# Supplementary material for: Untargeted Metabolomics of Slc13a5 Deficiency Reveal Critical Liver–Brain Axis for Lipid Homeostasis
Source: MDPI journal article supplement (doi:10.3390/metabo12040351), 2022-04-14
Supplement: s1 [file s1]

## Supplementary Data

# Untargeted Metabolomics of Slc13a5 Deficiency Reveal Critical Liver-Brain Axis for Lipid Homeostasis

Sofia Milosavljevic<sup>1,2</sup>, Kevin E. Grinton<sup>1</sup>, Xiqi Li<sup>1</sup>, Cláudia Medeiros<sup>3</sup>, Patrick Gillespie<sup>3</sup>, John R. Seavitt<sup>1</sup>, Brett H. Graham<sup>3</sup>, and Sarah H. Elsea<sup>1,\*</sup>

<sup>1</sup>Department of Molecular and Human Genetics, Baylor College of Medicine, Houston, TX, USA

<sup>2</sup>Harvard Medical School, Boston, MA, USA

<sup>3</sup>Department of Medical and Molecular Genetics, Indiana University School of Medicine, Indianapolis, IN, USA \*Correspondence: sarah.elsea@bcm.edu; Tel.: +1-713-798-5484

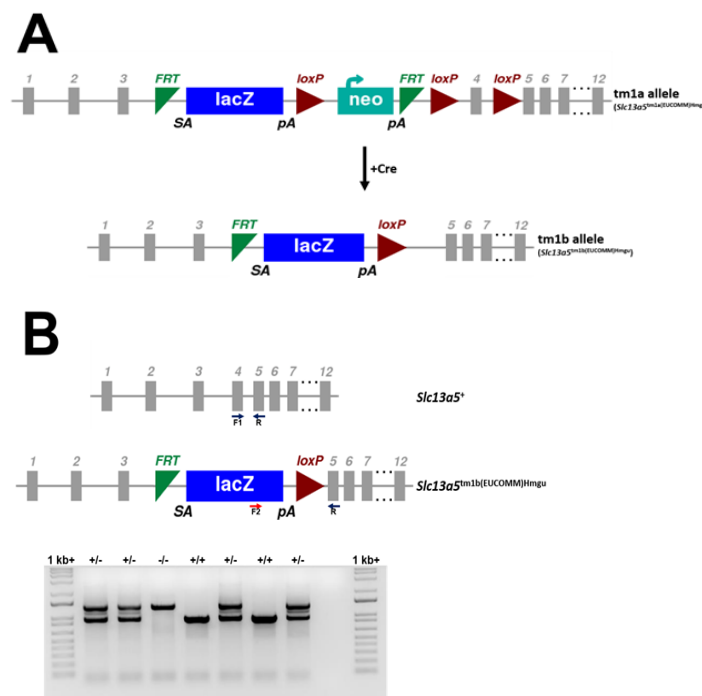

**Figure S1. Generation and Genotyping of Slc13a5 Deficiency Mice.** **A.** EUCOMM production of mouse model of Slc13a5 deficiency (C57BL/6N-Slc13a5<sup>tm1b</sup>(EUCOMM)Hmgu/Ieg). The *tm1a* allele has a *lacZ* gene trap cassette and a neomycin resistant transgene flanked by indicated FRT and loxP sites inserted in the intron between exons 3 and 4 of *Slc13a5*, as well as an additional loxP site inserted in the intron between exons 4 and 5. The *Slc13a5*<sup>tm1b</sup> mutant allele is generated by Cre-mediated excision of *Slc13a5* exon 4 and the *neo* cassette from the *Slc13a5*<sup>tm1a</sup> allele, which results in a frameshift mutation, leaving the *lacZ* gene trap intact. Partial genomic maps of *Slc13a5*<sup>tm1a</sup> and *Slc13a5*<sup>tm1b</sup> alleles are depicted. **B.** Genotyping of Slc13a5-deficient mice (C57BL/6N-Slc13a5<sup>tm1b</sup>(EUCOMM)Hmgu/Ieg). The wild type allele PCR amplicon is 919 bp, and the mutant allele PCR amplicon is 1301 bp. Partial genomic maps of *Slc13a5*<sup>+</sup> and *Slc13a5*<sup>tm1b</sup> alleles with indicated PCR primer binding sites, as well as a representative picture of agarose gel electrophoretic analysis of PCR genotyping results, are shown. “1 kb+” = 1 kb Plus DNA ladder. “+/+” = *Slc13a5*<sup>+/+</sup>; “+/-” = *Slc13a5*<sup>+/tm1b</sup>; and “-/-” = *Slc13a5*<sup>tm1b/tm1b</sup> [1].

1. Skarnes WC, Rosen B, West AP, Koutsourakis M, Bushell W, Iyer V, Mujica AO, Thomas M, Harrow J, Cox T, et al. A conditional knockout resource for the genome-wide study of mouse gene function. *Nature*, 2011. 474(7351): p. 337-42.

**Online eTable S1. Slc13a5 Deficiency Mouse Tissue Metabolite Flux.** Interactive table: [https://app.powerbi.com/view?](https://app.powerbi.com/view?r=eyJrIjojN2I4YTM3ZjMtZGE1MS00ODk0LThlNmItYWZlY2IzZjY2ZGE1IiwidCI6IjZiYmUyYmZmLWNjMzQtNDBIYi05OTZmLWZiNGY2ZjI5MTdiZiIsImMiOiJ9)

[r=eyJrIjojN2I4YTM3ZjMtZGE1MS00ODk0LThlNmItYWZlY2IzZjY2ZGE1IiwidCI6IjZiYmUyYmZmLWNjMzQtNDBIYi05OTZmLWZiNGY2ZjI5MTdiZiIsImMiOiJ9](https://app.powerbi.com/view?r=eyJrIjojN2I4YTM3ZjMtZGE1MS00ODk0LThlNmItYWZlY2IzZjY2ZGE1IiwidCI6IjZiYmUyYmZmLWNjMzQtNDBIYi05OTZmLWZiNGY2ZjI5MTdiZiIsImMiOiJ9)
