# Supplementary material for: Untargeted Metabolomics of Slc13a5 Deficiency Reveal Critical Liver–Brain Axis for Lipid Homeostasis
Source: Metabolites. 2022 Apr 14;12(4):351. doi: 10.3390/metabo12040351 (PMC9032242; doi:10.3390/metabo12040351)
Supplement: Supplementary file 1 [file metabolites-12-00351-s001.zip › metabolites-1641645-supplementary.xlsx]

## Sheet: Table S1a-serum
Supplementary Table S1a. Total Metabolites Identified in Serum of Slc13a5 Deficiency Mice
Serum			SAMPLE NAME	7406	7407	7408	7409	7410	7411	7412	7413	7414	7415	7416	7417	7418	7419	7420	7421	7422	7423	7424	7425	7426	7427	7428	7429	7430	7431	7432	7433	7434	7435
			GENDER	F	M	M	F	F	F	F	F	F	F	F	F	F	F	F	M	M	M	M	M	M	M	M	M	M	M	M	M	M	F
			GENOTYPE	Slc13a5 +/+	Slc13a5 -/-	Slc13a5 +/+	Slc13a5 +/+	Slc13a5 +/-	Slc13a5 +/-	Slc13a5 +/-	Slc13a5 +/-	Slc13a5 +/-	Slc13a5 -/-	Slc13a5 -/-	Slc13a5 -/-	Slc13a5 -/-	Slc13a5 -/-	Slc13a5 -/-	Slc13a5 +/+	Slc13a5 +/+	Slc13a5 +/+	Slc13a5 +/+	Slc13a5 +/+	Slc13a5 +/+	Slc13a5 +/-	Slc13a5 +/-	Slc13a5 +/-	Slc13a5 +/-	Slc13a5 +/-	Slc13a5 -/-	Slc13a5 -/-	Slc13a5 +/-	Slc13a5 +/+
BIOCHEMICAL	CAS	KEGG	Group HMDB	WT	KO	WT	WT	heterozygote	heterozygote	heterozygote	heterozygote	heterozygote	KO	KO	KO	KO	KO	KO	WT	WT	WT	WT	WT	WT	heterozygote	heterozygote	heterozygote	heterozygote	heterozygote	KO	KO	heterozygote	WT
(12 or 13)-methylmyristate (a15:0 or i15:0)	2485-71-4		HMDB0061707	0.5411	0.5411	0.6024	1.2872	0.5411	1.2384	1.5648	1.1172	1.235	0.7674	0.7189	0.727	0.5411	1.1194	0.6088	1.1284	0.5411	0.5411	0.9165	0.9425	1.8501	1.6128	1.2858	0.5418	0.8443	0.6496	0.5411	0.5411	1.0575	0.5411
(14 or 15)-methylpalmitate (a17:0 or i17:0)		C16995	HMDB0061859	0.7525	1.0902	1.0184	1.6881	0.8811	1.4427	1.5445	1.2854	1.2889	0.9816	0.9646	0.6845	1.0208	1.3201	0.9447	0.9064	0.9221	0.9723	0.9705	0.9281	1.7022	1.4458	1.2861	0.7816	1.0531	0.8589	0.9329	0.7703	1.2585	1.2406
(16 or 17)-methylstearate (a19:0 or i19:0)	2724-59-6		HMDB0037397	0.8047	1.3976	0.8934	0.9435	1.0113	0.9327	1.3531	1.0789	1.0908	0.8431	0.8439	0.6409	0.7345	1.0682	0.6366	1.2195	1.1399	0.6591	1.0661	1.1037	1.7443	1.1542	1.1379	0.7603	1.0505	0.8551	0.7587	0.6976	0.9887	1.0491
(2 or 3)-decenoate (10:1n7 or n8)				0.3896	1.1707	0.7949	1.9139	0.7492	1.5504	2.1408	1.0904	1.2468	0.897	0.7105	0.9096	0.5463	0.7947	0.3896	2.0297	0.4425	0.3896	0.3896	0.3896	1.5668	2.244	1.6284	0.5901	0.8684	0.3896	0.7487	0.3896	1.1193	1.3796
(N(1) + N(8))-acetylspermidine		C00612,C01029	HMDB0001276,HMDB0002189	1.1078	0.7926	1.0172	0.7791	1.4956	0.763	0.5092	0.679	1.0467	1.5424	1.3001	1.0284	0.8851	0.6897	1.1541	0.9856	1.0519	1.2458	0.7563	0.8062	0.9193	1.0383	0.989	1.4662	0.9437	1.5684	1.2854	0.6527	0.5177	1.011
(R)-3-hydroxybutyrylcarnitine			HMDB0013127	0.7812	1.168	0.7221	2.0468	0.8781	1.1825	1.899	0.8934	1.0019	1.477	0.797	0.6627	0.9203	0.7915	0.6484	0.9981	0.8109	1.9004	1.655	1.729	1.2919	1.0816	0.9333	1.9125	0.4131	3.3028	1.3687	0.478	0.3351	1.4151
(S)-3-hydroxybutyrylcarnitine			HMDB0013127	1.0379	1.1904	0.8208	1.6543	0.9268	1.2126	1.8355	0.801	0.8341	2.2529	0.6378	0.3873	0.8441	0.9621	0.8194	1.7267	0.7642	1.0647	1.0844	1.1689	1.3521	0.9495	1.0952	1.3556	0.8168	2.2751	0.9274	0.6615	0.7247	1.3879
1,2,3-benzenetriol sulfate (2)			HMDB0060018,HMDB0060016	1.1683	1.1068	2.8804	0.3252	0.8932	0.4982	0.5671	0.4955	0.4252	1.4965	0.7176	1.3349	1.96	0.3252	1.1708	1.5539	0.4747	0.5802	1.3298	1.2775	0.3252	0.3252	0.5024	4.0916	0.3948	5.8911	0.4874	1.1377	0.3355	0.3252
1,2-dilinoleoyl-GPC (18:2/18:2)	998-06-1		HMDB0008138	0.881	0.9855	0.8615	1.1892	1.1026	0.9849	0.8992	0.654	0.6831	1.1088	0.7218	0.7348	0.6322	0.9848	1.2557	0.7005	1.2043	1.0145	1.2179	1.0203	1.189	0.7762	1.2471	1.2962	0.9522	1.1734	1.2224	1.1728	0.9392	1.1737
1,2-dilinoleoyl-GPE (18:2/18:2)*			HMDB0009093	0.9122	1.014	0.3842	0.3935	0.7531	1.0362	0.443	0.2614	0.4004	0.9965	0.3895	0.6439	0.3563	0.6219	1.2753	0.6646	1.2329	1.4326	1.6633	1.3674	1.0035	0.4671	1.4083	1.1442	1.0556	1.1107	1.4787	1.6433	0.9434	1.1046
1,2-dipalmitoyl-GPC (16:0/16:0)	63-89-8	D03585	HMDB0000564	0.9328	0.8861	0.8932	1.0915	1.2309	1.2232	1.0304	0.8293	1.0635	1.3157	0.8887	0.9067	1.0411	1.1828	1.0795	0.877	1.0147	0.9558	0.949	1.0536	1.1647	0.9831	0.9617	1.0211	0.9627	1.0579	0.7697	1.0561	0.8535	0.9853
1,2-dipalmitoyl-GPE (16:0/16:0)*			HMDB0008923	1.0343	1.0049	0.6439	0.8554	0.9189	0.9155	1.2463	0.4351	0.861	1.7304	0.7734	0.3217	0.5687	1.2878	0.9112	1.058	1.0663	0.8671	0.88	1.6631	1.7144	1.0195	1.1583	1.1553	0.9173	1.2437	0.7554	1.1936	0.9951	1.6382
1,2-distearoyl-GPC (18:0/18:0)	816-94-4		HMDB0008036	1.4585	0.5696	1.7088	2.2531	1.5295	1.7896	1.6574	1.2077	1.4033	1.1146	0.9742	1	0.9105	1.4492	1.0358	0.6619	0.2777	0.2777	0.6894	0.396	0.8613	0.2777	0.2777	1.1225	0.9714	0.2777	0.8169	0.8598	0.7328	0.2777
1,5-anhydroglucitol (1,5-AG)	154-58-5	C07326	HMDB0002712	1.0018	0.7997	1.1606	1.294	1.2266	1.2162	1.3806	1.3176	1.1563	1.241	1.2105	1.2947	1.1266	1.1281	1.1321	0.6303	0.8346	0.7346	1.0118	0.9982	0.6626	0.9208	0.8355	0.7198	0.6861	0.7113	0.9721	0.8608	0.7962	0.9658
1-(1-enyl-oleoyl)-GPE (P-18:1)*				1.039	1.0558	1.0797	0.9127	0.776	0.9713	1.0171	0.7955	0.8269	7.0849	1.0522	0.9026	0.9093	0.9848	0.9777	1.0764	1.0309	0.88	0.9497	1.812	0.9858	1.1631	0.9478	1.1882	0.8757	1.6271	1.0836	1.0637	0.6889	1.0142
1-(1-enyl-palmitoyl)-2-arachidonoyl-GPC (P-16:0/20:4)*			HMDB0011220	1.071	0.9247	1.3427	1.8491	1.2744	1.343	1.1547	0.8882	1.1566	1.5706	0.8739	1.4911	1.0616	1.2125	1.3411	0.7418	0.9971	0.7496	1.1824	1.0474	0.8322	0.851	0.604	0.9393	0.9498	0.7834	0.6907	1.0029	0.604	0.8667
1-(1-enyl-palmitoyl)-2-arachidonoyl-GPE (P-16:0/20:4)*			HMDB0011352	0.7007	1.1213	0.8303	0.9211	1.0273	0.9971	0.9388	0.6142	0.707	1.1687	0.7256	1.0029	0.7552	0.9424	1.0194	0.9183	1.4202	1.0443	1.4247	1.2634	1.003	1.0215	0.8869	1.1251	0.8224	1.1377	0.8307	1.1197	0.7028	1.2245
1-(1-enyl-palmitoyl)-2-linoleoyl-GPC (P-16:0/18:2)*			HMDB0011211	0.7436	1.2931	0.9982	1.5563	0.9422	1.1897	0.728	0.6721	0.9389	0.7484	0.654	1.1541	0.6968	0.8046	1.2093	0.9567	1.1494	1.0194	1.3417	1.4003	1.0436	1.0166	0.8957	1.1958	0.9104	1.0174	0.9404	1.0018	0.947	1.2824
1-(1-enyl-palmitoyl)-2-linoleoyl-GPE (P-16:0/18:2)*			HMDB0011343	0.426	1.5265	0.7185	1.0346	0.9118	0.7261	0.7495	0.5342	0.6705	0.8226	0.6098	1.2546	0.6794	0.8433	0.9189	1.1778	1.4349	1.0943	1.9484	1.6312	1.0705	1.0119	1.126	1.0274	0.7346	0.9881	1.1685	1.0978	0.6584	1.2465
1-(1-enyl-palmitoyl)-2-oleoyl-GPC (P-16:0/18:1)*			HMDB0007996	0.8872	1.0414	1.0004	1.2443	0.8769	1.047	0.8578	0.7727	1.0464	1.0278	0.8489	1.1255	0.8775	1.0152	0.9789	1.037	0.9427	0.955	1.1948	1.0867	1.1227	1.0764	0.9452	0.9996	0.8125	1.2308	0.8206	0.9952	0.894	1.1625
1-(1-enyl-palmitoyl)-2-oleoyl-GPE (P-16:0/18:1)*			HMDB0011342	0.6403	1.2599	0.8734	1.1519	0.9275	1.0108	0.9614	0.5008	0.7888	1.0479	0.6383	1.0776	0.7279	0.9782	0.8878	1.018	1.1088	0.8712	1.3503	1.5017	1.2266	1.194	0.9391	1.1171	0.8912	1.0673	0.9928	1.0072	0.7803	1.1524
1-(1-enyl-palmitoyl)-2-palmitoyl-GPC (P-16:0/16:0)*			HMDB0011206	0.8241	1.0232	0.8441	1.1985	1.0072	1.1804	0.94	0.7542	1.0831	1.0044	0.824	1.0785	0.8322	1.0161	0.9956	0.8699	1.0281	0.9844	1.0734	1.0995	1.1228	1.0856	0.9698	0.9501	0.9553	1.0636	0.6969	0.954	0.8326	1.1226
1-(1-enyl-palmitoyl)-GPC (P-16:0)*			HMDB0010407	1.226	1.1034	1.4347	1.2185	0.8209	1.0554	0.7602	0.6889	1.0455	1.4087	0.7073	1.0505	1.0741	1	0.9955	1	0.8221	0.8958	1.0984	0.981	0.9703	0.8878	1.0201	0.9374	1.1097	0.7857	0.8642	0.9988	1.0337	1.1339
1-(1-enyl-palmitoyl)-GPE (P-16:0)*			HMDB0011152	1.1473	1.0074	1.2713	1.2034	0.895	0.9394	0.8115	0.6283	0.9129	4.2883	0.8728	0.9855	0.9472	1.0608	1.1043	1.0899	0.9326	0.9703	0.9926	1.6168	0.9137	1.0509	0.9477	1.0816	1.0843	1.3598	0.8238	1.1286	0.8541	1.0834
1-(1-enyl-stearoyl)-2-arachidonoyl-GPE (P-18:0/20:4)*			HMDB0005779	0.9811	0.9556	1.1275	1.3346	1.1491	1.2793	1.1009	0.736	0.8473	1.0453	0.8023	1.0013	0.6922	1.0487	1.1516	0.6772	1.1783	0.9646	1.1099	0.9987	0.8823	1.0936	0.8482	1.0622	0.7985	0.7862	0.7456	1.0747	0.69	1.3232
1-(1-enyl-stearoyl)-2-linoleoyl-GPE (P-18:0/18:2)*			HMDB0011376	0.7884	1.2074	0.9812	1.411	1.0038	1.0991	0.9303	0.655	0.7139	0.8325	0.6627	1.0486	0.589	0.8938	1.0906	0.7661	1.3549	0.9931	1.2521	1.3004	1.0543	1.1371	1.1402	1.2262	0.7801	0.9664	0.9962	1.1564	0.7777	1.4674
1-(1-enyl-stearoyl)-2-oleoyl-GPE (P-18:0/18:1)	144371-68-6		HMDB0011375	0.8548	1.2263	0.8059	1.2396	0.9982	1.1345	0.9246	0.689	0.802	1.0018	0.7456	1.0516	0.6624	1.0537	1.047	0.6897	1.3296	0.6992	1.1023	1.3153	0.9957	1.1047	0.8366	1.0675	0.7843	0.7186	1.0571	1.0401	0.5921	1.3767
1-(1-enyl-stearoyl)-GPE (P-18:0)*				1.1153	0.9426	1.2283	1.4929	1.0103	1.0279	0.8032	0.652	0.9446	1.8129	0.8517	0.956	0.8611	1.0304	1.0614	0.8573	1.004	0.9295	1.0632	1.0438	0.8911	1.1173	0.9067	1.0015	0.9985	0.8373	0.9028	1.0695	0.8406	1.0952
1-arachidonoyl-GPA (20:4)	799268-65-8		HMDB0062312	0.9969	0.8728	1.5113	1.2613	1.4516	0.7327	1.2316	1.1046	1.6223	1.2308	1.3809	0.9669	1.2272	0.797	0.7045	1.0397	0.515	0.7565	1.2014	0.7593	1.0031	1.1919	0.8092	1.0255	0.9869	1.181	0.682	0.8423	0.774	0.7062
1-arachidonoyl-GPC* (20:4)*		C05208	HMDB0010395	1.3428	0.9258	1.4183	1.504	1.2275	1.1031	1.3063	1.0689	1.6664	1.2046	1.0162	0.8626	1.0064	1.5144	1.068	0.884	0.9088	0.7986	0.8946	0.8894	1.2424	0.9829	0.9621	0.9085	1.1245	0.8606	0.661	0.9604	0.9794	0.9936
1-arachidonoyl-GPE (20:4n6)*			HMDB0011517	1.2779	1.1	1.3761	0.994	0.9745	0.837	1.1135	0.7973	1.4647	1.006	0.7619	0.8381	1.0452	1.3581	0.9712	1.1521	0.9736	0.8231	0.9757	0.9679	1.1613	1.1048	1.1475	0.8244	1.3388	0.7061	0.5967	0.921	1.193	1.2143
1-arachidonoyl-GPI* (20:4)*			HMDB0061690	1.0016	1.0252	1.0565	1.5212	1.1462	1.156	1.1622	1.1519	1.2123	0.8798	0.9605	1.0866	1.0306	1.1289	1.0418	0.8363	0.9289	0.7518	0.7855	0.669	1.0594	0.828	0.8876	0.712	1.1322	0.6885	0.8118	0.9984	0.9874	0.936
1-arachidonylglycerol (20:4)	35474-99-8	C13857	HMDB11578	0.6563	1.0907	0.8878	1.336	1.4472	1.0482	1.5206	0.7358	1.5192	1.0951	0.8597	0.9979	0.8956	1.615	1.295	0.9304	1.5803	0.9708	0.9838	1.0021	1.7231	1.8164	0.7901	0.8486	0.9656	1.3111	0.8816	0.8195	0.8255	1.5054
1-carboxyethylisoleucine				0.8333	3.2449	0.7238	0.3379	0.8705	0.6026	0.6642	0.8489	0.6859	1.2783	0.4789	0.4133	0.6443	0.3952	0.5888	1.2029	1.1444	2.8107	1.8573	1.821	1.6175	1.6511	1.9109	2.5289	1.096	3.5548	1.9134	0.904	0.5036	1.3188
1-carboxyethylleucine				1.7892	2.0185	0.8878	0.2993	1.274	0.8814	0.766	0.8951	0.8263	2.2927	0.7831	0.6432	0.9676	0.6079	1.053	0.9464	1.0026	1.8391	1.5488	1.3264	1.0889	0.9895	1.1225	2.4096	1.049	2.2834	1.1898	0.9974	0.4469	0.9019
1-carboxyethylphenylalanine				2.3318	1.1539	1.1935	0.4651	1.6801	1.0224	1.0006	0.9974	1.078	1.9507	1.1128	0.8925	1.4384	0.8361	1.4784	0.8446	0.8055	1.4707	1.339	0.9994	0.8123	0.7228	0.7602	1.765	0.9364	1.8013	0.8295	0.869	0.3742	0.7424
1-carboxyethyltyrosine				2.0072	0.8984	1.0423	0.3496	1.7346	1.212	1.0581	0.7081	1.1825	1.8397	1.0212	1.2681	1.444	0.9445	1.6002	0.7649	0.7592	1.5047	1.1264	0.8998	0.845	0.4913	0.7624	1.6067	0.9788	2.3258	0.6959	0.7455	0.3699	0.677
1-carboxyethylvaline				0.8246	3.1224	0.6233	0.3168	0.9729	0.6207	0.697	0.8261	0.5938	1.4927	0.6467	0.4776	0.6585	0.3905	0.5916	1.1083	1.0524	2.1541	1.9191	1.6256	1.1435	1.5827	1.8349	2.159	0.9612	3.1871	1.5091	1.0271	0.4177	1.2127
1-dihomo-linolenylglycerol (20:3)				0.5211	1.3526	0.9555	0.9082	0.9866	0.737	1.0765	0.7131	1.0696	0.8441	0.7617	0.5577	0.9731	0.9737	1.0014	1.1761	1.3166	1.0501	1.0316	0.9362	1.5141	1.3237	1.2116	0.9989	1.1245	0.7996	1.1815	0.814	1.0011	1.2269
1-docosahexaenoylglycerol (22:6)			HMDB0011587	0.3321	0.6584	1.0967	1.558	1.1559	1.1992	1.8191	0.6208	1.5679	0.8736	0.7029	1	0.9659	1.65	1.0807	0.9377	1.309	0.4218	0.4536	0.7528	2.3333	2.4788	1.0679	0.3321	0.8103	0.889	1.1089	0.4247	0.6797	1.1015
1-heptadecenoylglycerol (17:1)*				0.76	1.8271	1.0916	0.6737	0.8037	1.1357	1.2383	1.0576	0.9877	0.8387	0.805	0.6648	0.8879	0.896	1.0151	1.0855	1.2411	0.9808	1.1564	0.9344	1.0559	1.0123	1.5609	0.8437	1.0295	0.4913	0.5575	0.7435	1.185	1.4607
1-lignoceroyl-GPC (24:0)	325171-59-3		HMDB0010405	0.8785	1.0384	0.9973	1.0061	0.9152	0.9117	0.8904	0.6317	0.8158	0.9009	0.7502	0.8196	0.7278	1.0302	1.0029	0.8267	1.1073	1.0027	1.1234	1.0877	1.0422	1.1015	1.2206	1.0853	1.017	0.9807	0.6947	1.0342	0.9281	1.2784
1-linolenoyl-GPC (18:3)*		C04100	HMDB0010388	0.9845	1.1279	1.0886	1.54	1.1873	1.1315	1.0941	0.7248	1.0079	1.0304	0.8736	0.7392	0.7527	1.1514	0.9921	0.7998	1.0097	0.8026	0.9772	0.8923	1.0508	0.9346	1.3519	1.0666	0.9807	0.8752	0.7256	1.0264	0.9425	1.1352
1-linolenoylglycerol (18:3)	124151-74-2		HMDB0011569	1.0037	1.2449	0.8981	0.7315	1.3092	1.044	1.3508	0.6165	0.9963	0.9039	0.6287	1.124	1.2712	1.0138	1.5475	0.7584	1.1146	0.8375	0.86	0.5545	0.9692	1.0691	1.0043	0.4143	1.1406	0.4045	0.9011	1.1274	0.6676	1.0739
1-linoleoyl-2-arachidonoyl-GPC (18:2/20:4n6)*		C05208	HMDB0008147	1.0001	1.0969	0.9999	1.2027	0.8357	0.9127	0.8844	0.6949	0.9144	1.0158	0.6832	0.626	0.7974	0.9895	0.9955	0.8351	1.0985	1.1418	1.0987	1.2308	1.3804	1.0836	1.461	1.0322	1.0096	1.2269	0.8103	0.9631	0.8527	1.4779
1-linoleoyl-2-arachidonoyl-GPE (18:2/20:4)*			HMDB0009102	0.8402	1.1464	0.7622	0.5791	0.7631	0.8579	1.0456	0.4021	0.5897	1.2545	0.5068	0.5886	0.8663	0.8339	0.709	1.0778	1.1117	1.0403	1.202	1.7857	1.8389	1.1932	1.5305	1.0645	0.878	1.3007	1.0041	0.9959	0.8442	1.7948
1-linoleoyl-2-linolenoyl-GPC (18:2/18:3)*			HMDB0008141	0.6594	1.0505	0.7105	1.2503	0.8509	1.0302	0.812	0.4638	0.6878	0.7428	0.5048	0.6104	0.5363	1.2205	1.2134	0.6011	1.2488	0.8651	1.0404	1.1988	1.4996	0.9638	1.1795	1.0885	0.9758	1.2914	1.0242	1.0429	0.8363	1.6289
1-linoleoyl-GPA (18:2)*			HMDB0007856	0.9457	0.8993	1.1702	1.921	1.3565	1.0095	1.2267	0.7061	1.5611	0.9253	0.8007	0.8806	1.1448	1.8454	1.0509	1.1061	0.792	0.592	0.7632	1.2682	1.0005	1.1995	0.9492	0.7733	0.8827	1.4236	0.4549	0.7249	0.9995	1.1597
1-linoleoyl-GPC (18:2)		C04100	HMDB0010386	0.9897	1.0054	1.0658	1.1906	1.0771	1.0246	1.0558	0.8283	1.0236	0.9563	0.8497	0.8056	0.7964	1.1103	1.1425	0.8943	0.9919	0.929	0.9946	0.9328	1.1339	0.9049	1.0263	1.0112	1.0064	0.9065	0.8552	1.0796	0.9655	1.0684
1-linoleoyl-GPE (18:2)*			HMDB0011507	0.9987	1.1122	0.931	0.8077	1.0078	1.0756	1.1028	0.8356	1.1197	0.9507	0.7909	0.7064	0.7291	1.1614	1.2898	0.8687	1.0758	0.8183	1.1184	0.8977	1.1197	0.7878	1.0284	1.0013	1.1204	0.7837	0.9216	1.0625	0.9734	1.0432
1-linoleoyl-GPG (18:2)*				0.99	0.9102	1.0217	1.2615	1.01	1.7002	1.2428	0.9481	1.3099	1.1308	0.7223	0.9311	0.977	1.2857	1.1029	1.164	0.7942	0.8619	0.8721	0.8833	1.3192	0.9706	1.174	1.0452	1.1684	0.9002	0.6845	0.7785	0.8892	1.1335
1-linoleoyl-GPI* (18:2)*				0.8434	1.2056	0.9503	1.3076	1.1287	1.079	1.3123	1.0596	0.9652	1.0161	0.9922	0.9016	0.6949	1.0078	1.2998	0.6373	1.1055	0.7718	0.9829	0.8071	1.2876	0.7281	1.302	0.9657	0.8659	0.8708	1.117	1.1371	1.0141	0.9004
1-linoleoyl-GPS (18:2)*				0.9638	1.3702	0.7449	1.1166	1.3959	1.1011	1.6108	0.8994	1.0124	2.3532	1.0255	0.654	1.1845	0.8799	0.9092	0.947	0.8362	0.6713	0.8652	1.0114	1.1859	0.9045	0.654	1.1061	0.7107	1.6404	0.7604	1	0.8851	1.1658
1-linoleoylglycerol (18:2)	2277-28-3		HMDB0011568	0.6932	1.4524	1.0977	1.0307	0.9299	1.032	1.2359	0.8121	1.0574	0.962	0.7367	0.9831	1.2775	1.0063	1.1057	0.9826	1.1459	0.782	0.8135	0.6578	1.3781	1.3692	1.2452	0.5893	1.0294	0.5126	1.0498	0.782	0.6947	0.9937
1-methyl-4-imidazoleacetate	2625-49-2	C05828	HMDB0002820	1.2211	0.9299	0.9662	1.0514	1.1712	1.0609	1.2192	0.8988	1.6194	1.1957	0.9716	1.1073	1.2286	1.0065	1.1805	0.8624	0.9005	0.8392	0.7097	0.6865	1.0068	1.1383	0.9935	0.9277	1.1044	0.6415	1.0301	0.7614	0.7814	0.864
1-methyl-5-imidazoleacetate	4200-48-0		HMDB04988	1.3295	1.8557	0.9344	0.8549	1.1051	0.5637	1.6842	1.1716	2.2404	1.0757	0.9885	0.6013	1.0789	1.0154	0.926	0.7538	1.5281	1.476	0.8867	0.9016	0.9506	0.9994	0.7831	1.2914	0.7796	1.0006	0.5811	0.8582	1.0571	2.5339
1-methylhistamine	501-75-7	C05127	HMDB0000898	1.2982	1.0905	0.9954	1.1976	1.5897	0.7334	0.9015	0.7989	0.861	1.2751	0.9322	0.8208	1.0525	0.7964	1.0804	1.0396	1.0342	0.9486	1.0976	0.9223	0.8943	1.3566	0.8618	1.0046	1.1699	1.0389	1.6953	0.9799	0.6703	0.9759
1-methylhistidine	332-80-9	C01152	HMDB0000001	0.9944	1.3003	0.781	0.808	1.013	0.9591	0.883	0.7471	1.0056	0.8903	0.8017	0.914	1.1468	1.2092	1.0192	1.0113	1.0657	1.2064	0.9716	1.0763	0.8588	1.0627	0.6053	0.7198	1.4183	0.8191	0.9559	1.1573	1.141	1.4227
1-methylnicotinamide	1005-24-9	C02918	HMDB0000699	1.1958	0.6467	1.521	1.5476	1.1931	0.8021	0.9157	0.8438	1.128	1.5461	1.0502	0.9191	1.3935	0.7401	1.8455	0.9919	0.6258	1.2721	0.8453	0.6621	1.0084	0.8212	0.5788	1.307	1.0081	1.3152	1.2178	0.7055	0.9242	0.9016
1-myristoyl-2-arachidonoyl-GPC (14:0/20:4)*			HMDB0007883	0.7213	1.3902	0.9965	1.2707	1.1355	0.8446	0.8619	0.698	1.2563	0.8438	0.7698	0.6218	0.7162	1.3126	0.9609	0.756	1.2772	1.1005	1.1149	1.4099	1.2101	1.0498	1.8699	0.8901	0.8879	1.23	0.7238	1.0035	0.8271	2.0962
1-myristoyl-2-palmitoyl-GPC (14:0/16:0)	69525-80-0		HMDB0007869	0.7225	0.9721	0.8646	1.0127	1.215	1.2805	0.9873	0.6493	1.0369	1.143	0.8563	0.8892	0.8154	1.0747	1.0671	0.9441	0.9798	1.0239	0.8236	1.4208	1.0173	1.0863	1.1626	0.9587	1.0953	1.0909	0.5713	0.9304	0.8851	1.288
1-oleoyl-2-arachidonoyl-GPE (18:1/20:4)*			HMDB0009069	0.6921	1.362	0.8889	0.6128	0.5929	0.7136	0.6491	0.5311	0.6722	0.7633	0.6484	0.5376	0.8747	0.8164	0.667	1.3382	1.3772	1.453	1.3669	1.8809	1.4769	1.6521	1.9156	1.1234	1.1277	1.1969	1.1922	0.899	1.101	2.1237
1-oleoyl-2-arachidonoyl-GPI (18:1/20:4)*				0.9485	1.3636	0.8068	1.0454	0.6225	0.8665	0.6907	0.5901	0.8323	0.9779	0.7401	0.7142	0.9103	0.89	0.8607	1.2756	1.1936	1.1552	1.1829	1.4846	1.6522	1.415	1.7648	0.8743	1.3502	1.4235	1.0221	0.8697	1.2135	1.8359
1-oleoyl-2-docosahexaenoyl-GPC (18:1/22:6)*			HMDB0008123	0.9853	1.1279	1.2793	1.1584	0.8879	0.9912	0.8798	1.0099	1.0563	0.8859	0.8677	0.8453	0.9558	0.9388	0.9261	1.0067	1.0556	1.0667	1.0597	1.1103	1.0326	0.9933	1.0757	0.9774	1.0594	0.9791	0.9651	0.9501	1.0964	1.362
1-oleoyl-2-docosahexaenoyl-GPE (18:1/22:6)*			HMDB0009078	0.5849	1.4193	0.826	0.5635	0.4701	0.6991	0.6423	0.5649	0.4822	0.7425	0.5647	0.5327	1.0159	0.6247	0.5627	1.4455	1.4564	1.5704	1.1848	1.9532	1.4121	1.8018	2.0052	1.1358	1.0022	1.0112	1.2529	0.9506	0.9978	2.0844
1-oleoyl-2-linoleoyl-GPC (18:1/18:2)*			HMDB0008105	1.1778	1.0535	1.4998	1.2807	1.0507	1.3027	0.9178	1.1806	1.1166	1.0036	1.1093	0.9754	0.9823	1.003	1.1143	0.7918	0.9267	0.944	0.8509	0.8662	0.8452	0.7127	1.0927	0.9955	0.9822	0.7916	0.997	0.9829	1.2092	1.1302
1-oleoyl-2-linoleoyl-GPE (18:1/18:2)*			HMDB0005349	0.6303	1.3563	0.5871	0.4102	0.633	0.8265	0.5375	0.4082	0.4485	0.6844	0.5218	0.6129	0.6118	0.6434	1.0434	1.0785	1.5462	1.4711	1.5639	1.8107	1.1876	1.0874	1.8149	1.1988	0.9566	1.1605	1.4794	1.3238	0.9113	1.8741
1-oleoyl-GPC (18:1)	19420-56-5	C03916	HMDB0002815	1.1265	1.1914	1.3728	0.9988	0.9197	0.9225	0.8843	0.9178	1.0698	0.8965	0.8972	0.6847	0.868	1.1103	0.8675	1.1716	0.9888	1.0012	0.996	1.0909	0.9606	1.0248	1.1963	1.0678	1.1165	0.9082	0.8085	1.0046	1.2171	1.2703
1-oleoyl-GPE (18:1)	89576-29-4		HMDB0011506	1.19	1.0239	1.209	0.9372	1.007	0.9365	0.8548	0.7267	1.0708	1.1024	0.7561	0.7251	0.8861	1.3132	1.3193	0.978	0.8759	0.9088	1.049	0.9634	1.0584	0.8758	1.026	0.993	1.187	0.7444	0.8033	1.0733	1.2736	1.1214
1-oleoyl-GPG (18:1)*				1.0457	1.0282	1.0559	0.6637	1.1749	1.4045	1.197	0.9987	1.3035	1.1331	0.9509	0.7623	0.7966	1.2395	1.0013	1.1706	0.7753	0.807	0.8615	0.9863	0.7854	0.6673	1.0951	0.9504	1.3025	0.7452	0.5691	1.0239	0.8469	1.0773
1-oleoyl-GPI (18:1)			HMDB0061693	0.866	0.9358	0.9845	0.9214	0.9325	0.7835	0.914	1.1344	0.8398	1.6203	1.0287	1.281	0.6558	1.0155	1.1213	0.5743	1.1358	0.5937	1.0185	1.086	1.0657	0.6523	1.1967	0.859	0.8824	0.8329	1.4479	1.349	1.2871	1.2572
1-oleoylglycerol (18:1)	111-03-5		HMDB0011567	0.6646	1.6004	1.0657	0.9979	1.4543	1.5242	1.1624	0.7245	0.9221	1.0694	0.7611	0.9554	1.1714	0.9955	1.2249	1.4461	0.7583	0.8946	1.0021	0.6142	0.6914	0.8758	1.2614	0.7506	1.2979	0.4635	1.0218	1.0023	0.9347	1.2949
1-palmitoleoyl-2-linolenoyl-GPC (16:1/18:3)*			HMDB0008008	0.4679	1.8824	0.6749	1.2684	0.7303	0.9368	0.7366	0.5522	0.8482	0.3996	0.4754	0.5354	0.5633	1.1307	0.8842	0.9305	1.549	1.221	1.2327	2.1584	1.3779	1.5893	2.3074	1.1266	0.9879	1.4659	1.0121	0.899	1.035	3.1308
1-palmitoleoyl-GPC* (16:1)*			HMDB0010383	1.1052	1.7342	1.3008	0.8621	0.8101	0.8822	0.6497	0.8975	0.9371	0.862	0.8607	0.7056	1.0175	0.8569	0.7942	1.351	1.0135	1.2014	1.1406	1.2173	0.8595	0.9865	1.7591	1.1462	1.2569	0.9186	0.8458	1.0723	1.4616	1.4558
1-palmitoleoylglycerol (16:1)*				1.0457	2.6892	1.1589	0.7232	0.7285	1.1798	0.787	0.711	1.0949	0.7922	0.8064	0.9216	1.1355	0.7717	0.7864	1.2838	1.5424	1.9028	1.0573	0.8738	0.8166	1.234	3.0831	0.7632	1.5657	0.5443	0.8208	0.9543	1.5249	2.6078
1-palmitoyl-2-arachidonoyl-GPC (16:0/20:4n6)	35418-58-7	C05208	HMDB0007982	0.8793	0.9967	0.8662	1.0169	1.0236	0.9525	0.9682	0.7535	0.9676	0.9582	0.8474	0.8956	0.8667	1.0633	0.9855	0.9702	1.1491	1.0297	1.0364	1.0566	1.1007	1.0838	1.0864	1.0033	1.0391	1.0165	0.8307	1.0294	0.9033	1.1935
1-palmitoyl-2-arachidonoyl-GPE (16:0/20:4)*		C05210	HMDB0005323	0.7188	1.3428	0.7694	0.624	0.7185	0.7007	0.6378	0.4769	0.7323	0.7205	0.6626	0.6935	0.7611	0.8106	0.766	1.2897	1.4897	1.3947	1.3851	1.6315	1.3707	1.5979	1.9447	1.0928	1.1327	1.2095	1.1896	0.9497	1.0503	2.1439
1-palmitoyl-2-arachidonoyl-GPI (16:0/20:4)*			HMDB0009789	0.794	1.4953	0.9638	1.0636	0.8586	0.8971	0.6889	0.5434	0.8517	0.8011	0.6311	0.9725	0.7632	0.9357	1.0428	1.2434	1.3012	1.2076	0.9678	1.2717	1.2999	1.4178	1.7901	0.9684	1.1743	1.1562	1.1111	0.9424	1.0275	1.771
1-palmitoyl-2-dihomo-linolenoyl-GPC (16:0/20:3n3 or 6)*				0.8913	1.2208	0.8777	0.8828	0.8444	0.8433	0.7668	0.7717	0.8926	0.7952	0.7826	0.7596	0.8543	0.8909	0.9203	1.1664	1.0891	1.2118	1.1612	1.2412	1.1971	1.1072	1.3645	1.0755	1.0579	1.0874	1.06	0.9744	1.0256	1.2724
1-palmitoyl-2-docosahexaenoyl-GPC (16:0/22:6)	59403-54-2		HMDB0007991	0.7528	1.074	0.8622	1.1523	0.9065	1.0225	0.85	0.7392	0.9182	0.8184	0.7683	1.0124	0.9293	0.9613	0.8911	1.1463	1.1716	1.0863	1.0386	1.0464	1.1541	1.2474	1.1911	0.9988	1.0818	0.9828	1.0012	0.9766	0.969	1.299
1-palmitoyl-2-docosahexaenoyl-GPE (16:0/22:6)*			HMDB0008946	0.5818	1.4786	0.7087	0.6302	0.5573	0.755	0.5724	0.4946	0.5297	0.5382	0.623	0.8215	0.8807	0.6548	0.6712	1.5288	1.6301	1.5642	1.3391	1.7662	1.3589	1.9689	2.3906	1.1971	1.1201	1.0029	1.5118	0.9971	1.0203	2.1218
1-palmitoyl-2-linoleoyl-GPC (16:0/18:2)	40811-94-7		HMDB0007973	0.8019	1.0825	0.824	0.9534	0.9838	0.903	0.8721	0.739	0.8565	0.8689	0.7933	0.9083	0.8134	0.9332	1.0048	1.0298	1.1736	1.0788	1.0723	1.066	1.03	1.0703	1.0972	0.9997	1.0299	1.0003	1.0155	1.0775	0.9125	1.2369
1-palmitoyl-2-linoleoyl-GPE (16:0/18:2)			HMDB0005322	0.466	1.4986	0.4474	0.3881	0.6066	0.7031	0.465	0.3633	0.5303	0.5697	0.4507	0.6037	0.5127	0.7243	0.8554	1.2165	1.7037	1.4383	1.499	1.8906	1.0826	1.254	1.8462	1.1544	1.0514	1.1613	1.4059	1.1553	0.9486	2.4711
1-palmitoyl-2-linoleoyl-GPI (16:0/18:2)			HMDB0009784	0.7162	1.3692	0.7189	1.1137	1.0231	1.0071	0.6895	0.3648	0.4688	0.9456	0.5966	0.7277	0.4771	0.8228	1.0138	0.8704	1.246	1.0057	1.2304	1.3056	1.2212	0.9943	1.9499	1.2402	0.8489	1.0931	1.2192	0.9562	0.8332	1.3923
1-palmitoyl-2-oleoyl-GPC (16:0/18:1)	26853-31-6;26853-31-6	C13875	HMDB0007972	0.8035	1.3478	0.9681	0.8916	0.9473	0.8571	0.7523	0.7722	0.9485	0.7564	0.7608	0.8117	0.8095	0.9926	0.8033	1.3345	1.2943	1.2148	1.0709	1.2954	1.0074	1.3892	1.3687	1.0869	1.1964	1.0175	0.958	1.0581	1.1632	1.6371
1-palmitoyl-2-oleoyl-GPE (16:0/18:1)	26662-94-2		HMDB0005320	0.7145	1.4734	0.5943	0.6107	0.7975	0.8478	0.762	0.4088	0.7626	1.0243	0.5241	0.4289	0.5336	0.9542	0.8007	0.9757	1.507	1.3445	1.1923	1.8163	1.1883	1.174	1.8114	1.2628	1.0887	1.1597	0.859	1.1038	1.1878	2.8462
1-palmitoyl-2-oleoyl-GPI (16:0/18:1)*			HMDB0009783	0.8695	1.5342	0.8703	1.1073	1.1508	0.6077	0.7057	0.5322	0.6254	0.9602	0.7247	0.8863	0.4591	0.9991	1.1293	0.8329	1.6083	0.8378	1.1335	1.3859	1.1372	0.8247	1.7706	1.0784	1.096	1.1564	0.4591	1.2588	1	1.6716
1-palmitoyl-2-palmitoleoyl-GPC (16:0/16:1)*			HMDB0007969	0.6791	1.7708	0.7852	0.8012	0.907	1.0044	0.6282	0.6384	1.0502	0.6382	0.7288	0.6873	0.6998	0.9956	0.6802	1.1899	1.5582	1.2288	1.0509	1.7085	0.8295	1.2754	1.8575	1.0541	1.0926	1.0779	0.7147	0.8989	1.253	2.5845
1-palmitoyl-2-stearoyl-GPC (16:0/18:0)	59403-51-9	C03889	HMDB0007970	0.9796	0.9099	1.0905	1.5316	1.2907	1.3561	1.1804	0.8959	1.0689	1.0758	0.8725	0.9246	0.8883	1.2148	1.0905	0.8401	0.9871	0.9023	0.9901	0.9526	1.1448	0.9545	1.1514	1.1478	0.9452	1.0099	0.8404	1.0797	0.8448	1.1
1-palmitoyl-GPC (16:0)	17364-16-8	C04102	HMDB0010382	1.0523	1.1427	1.1105	0.8935	0.9051	0.903	0.8512	0.834	0.9062	1.0582	0.8353	0.8975	1.0293	0.9578	0.9143	1.105	0.9994	1.0522	1.089	0.9991	1.0043	1.0005	1.2404	1.0906	1.076	0.9137	0.9078	1.0396	0.9598	1.1345
1-palmitoyl-GPE (16:0)	53862-35-4		HMDB0011503	1.019	1.1343	1.0682	0.9478	0.9582	0.9809	0.9707	0.9442	1.029	0.9071	0.9648	0.81	0.9807	1.0889	1.0909	0.9627	1.0961	1.0595	1.0041	0.8635	1.1918	1.1616	1.1181	0.99	1.1806	0.826	1.0952	0.9959	0.9485	1.1343
1-palmitoyl-GPG (16:0)*				0.8458	1.0028	0.9917	0.9082	1.2821	1.4979	0.9233	1.0433	0.9972	1.5429	0.8819	0.7947	0.741	1.0996	1.0226	1.2786	0.843	0.8624	1.1779	1.1391	0.8926	0.7603	1.2874	1.2599	1.0858	1.0346	0.8132	1.1108	0.9213	0.8298
1-palmitoyl-GPI* (16:0)			HMDB0061695	0.7425	1.2318	0.9498	1.0331	0.8689	0.7442	0.8106	0.948	0.638	1.1098	0.8099	1.8964	0.5272	1.204	1.0846	0.7062	1.6472	0.83	0.9669	1.1888	1.4925	0.7932	1.5231	0.6206	1.3074	0.6918	1.9281	2.0863	1.5186	1.5149
1-palmitoylglycerol (16:0)	542-44-9		HMDB0011564	0.9671	1.1104	0.9145	0.7723	1.2845	1.1561	1.1189	0.7398	0.9281	1.0329	0.6664	1.1306	1.3148	0.9138	1.1492	1.0458	1.1165	0.6143	0.8771	0.7779	0.8276	0.9276	1.1505	0.956	1.2308	0.5932	0.7343	1.5294	1.265	1.4755
1-ribosyl-imidazoleacetate*	29605-99-0	C05131	HMDB0002331	1.2611	1.7398	0.6357	0.5807	0.8338	0.6679	0.7666	0.7383	1.5046	1.0826	0.5643	0.5147	0.6301	0.9019	1.1878	0.5766	1.906	1.6046	1.2609	0.9927	1.0338	0.6646	1.0073	1.6204	1.1869	0.9296	1.6375	1.111	0.7311	1.2486
1-stearoyl-2-arachidonoyl-GPC (18:0/20:4)	35418-59-8		HMDB0008048	1.0205	0.8221	1.1144	1.3442	1.1631	1.1326	1.0906	0.8626	1.0097	1.0009	0.9397	1.0142	0.9843	1.1522	1.0393	0.8706	1.0083	0.9489	0.905	0.8917	1.0001	0.9958	0.9858	0.9999	1.0405	0.9447	0.8052	0.9846	0.8793	1.0828
1-stearoyl-2-arachidonoyl-GPE (18:0/20:4)		C05210	HMDB0009003	0.7964	1.0595	0.9	0.7869	0.8045	0.8399	0.7705	0.4816	0.6855	0.7574	0.6744	0.845	0.7881	0.959	0.8657	1.1973	1.4238	1.3102	1.2013	1.4336	1.1967	1.6153	1.8479	1.1306	1.2205	0.9981	1.0019	1.0987	1.0335	1.7259
1-stearoyl-2-arachidonoyl-GPI (18:0/20:4)	383907-33-3		HMDB0009815	0.9183	1.0978	1.0482	1.333	0.9038	1.0809	0.8723	0.7035	0.962	0.8895	0.7791	1.02	0.9328	1.1022	0.9689	1.0193	1.0647	1.0284	0.8979	1.0151	1.1834	1.2308	1.2084	0.9245	1.1548	0.9285	0.8814	0.9	0.9849	1.2502
1-stearoyl-2-docosahexaenoyl-GPC (18:0/22:6)	59403-52-0		HMDB0008057	1.0295	0.9156	1.2132	1.6512	1.0996	1.3173	1.0711	0.8948	1.0665	0.8856	0.9135	1.2735	1.0123	0.9819	0.9734	0.987	1.011	0.8907	0.8631	0.8344	0.914	1.1644	1.0586	0.989	1.0734	0.8264	1.0235	0.9098	0.9704	1.0294
1-stearoyl-2-docosahexaenoyl-GPE (18:0/22:6)*			HMDB0009012	0.7612	0.9989	0.8795	0.7437	0.77	1.0149	0.7981	0.5785	0.6722	0.8214	0.7851	0.9322	1.0401	0.7916	0.7605	1.4381	1.4641	1.2764	1.2164	1.2424	1.2085	1.716	1.7018	1.1336	1.1139	0.8607	1.1661	1.0011	0.9729	1.5033
1-stearoyl-2-linoleoyl-GPC (18:0/18:2)*			HMDB0008039	0.9879	0.9992	1.0065	1.1913	1.1028	1.1136	0.96	0.8587	0.8525	0.9345	0.877	1.0008	0.8731	0.9678	1.1242	0.9437	1.0698	1.0317	1.0641	0.9502	0.9923	0.9342	1.0546	1.0599	1.0298	0.9521	1.0493	1.0724	0.9349	1.1143
1-stearoyl-2-linoleoyl-GPE (18:0/18:2)*			HMDB0008994	0.7575	1.173	0.7472	0.569	0.9003	0.9177	0.6181	0.3795	0.5616	0.6963	0.5361	0.761	0.5532	0.8248	1.1349	0.9429	1.472	1.2653	1.4437	1.4377	1.012	1.1211	1.7768	1.2059	1.0889	1.0145	1.293	1.336	0.988	1.7959
1-stearoyl-2-linoleoyl-GPI (18:0/18:2)			HMDB0009809	0.6732	1.1571	0.8773	1.2295	0.9454	1.0525	0.8137	0.4965	0.6173	0.8739	0.6523	0.7939	0.5593	0.9126	1.1237	0.7526	1.2789	1.0231	1.0573	1.1116	1.2206	0.9206	1.537	1.1741	0.9514	1.1324	1.1633	1.0232	0.9769	1.3218
1-stearoyl-2-oleoyl-GPC (18:0/18:1)	56421-10-4		HMDB0008038	0.9426	1.1365	1.2456	1.2814	1.0675	1.1106	0.8907	0.8007	0.8477	0.7352	0.7783	0.9185	0.706	0.953	0.8821	1.0568	1.0552	1.0193	0.9504	1.0311	0.9078	1.129	1.2741	1.0655	1.1798	0.8953	0.9773	0.9807	1.0778	1.3797
1-stearoyl-2-oleoyl-GPE (18:0/18:1)			HMDB0008993	0.6788	1.1911	0.7597	0.6413	1.0845	0.9086	0.7604	0.4213	0.5447	1.0476	0.6074	0.5842	0.4708	0.87	1.1733	0.8876	1.6803	1.2065	1.4388	1.5373	0.9678	1.0142	1.9409	1.3481	0.9055	1.0415	1.1687	1.436	0.9858	1.8821
1-stearoyl-GPC (18:0)	19420-57-6		HMDB0010384	1.3166	1.0053	1.3797	1.1603	1.0177	1.0116	1.0421	0.9538	0.9947	1.1457	0.939	1.0075	1.0314	1.0184	0.9624	0.9243	0.8868	0.9808	0.9372	0.8309	0.9051	0.9307	1.1414	1.0716	1.0674	0.7921	0.9467	1.0321	0.9079	0.9852
1-stearoyl-GPE (18:0)	69747-55-3		HMDB0011130	1.0422	1.0237	1.1291	0.8533	0.9636	0.8323	1.0073	0.9989	0.9891	0.938	0.9681	0.8001	0.8666	1.0555	0.9992	0.9448	1.0934	1.0658	1.0002	0.8533	1.093	1.0947	1.1635	1.0535	1.1246	0.792	1.137	1.0104	0.9925	0.9998
1-stearoyl-GPI (18:0)	796963-93-4		HMDB0240261	0.8283	0.8284	1.1523	1.0772	0.8903	0.7462	0.9687	1.1874	0.9817	1.0183	0.9705	2.1901	0.7419	1.2718	0.9427	0.6689	1.3077	0.7164	0.9224	1.1324	1.3509	0.9748	1.1077	0.6222	1.1807	0.609	1.4238	1.8564	1.6015	1.2273
10-heptadecenoate (17:1n7)	29743-97-3		HMDB0060038	0.6796	1.4403	0.9964	2.0877	0.9106	1.6859	1.7568	1.2241	1.4284	0.7648	0.7434	0.4327	1.1255	1.0493	0.5891	0.9219	1.034	1.1576	0.6963	0.7207	1.6573	1.4817	1.4968	0.5575	1.0036	0.4462	0.9063	0.4942	0.9861	1.245
10-nonadecenoate (19:1n9)	73033-09-7		HMDB0013622	0.7973	1.148	1.1727	1.9311	1.047	1.4726	1.7561	1.2511	1.5776	1.0757	0.8671	0.6542	1.2005	1.2644	0.7718	1.0172	0.8842	0.8323	0.8234	0.6794	1.7473	1.4128	1.2872	0.6139	0.9828	0.4837	0.8756	0.5664	0.9655	0.981
10-undecenoate (11:1n1)	1333-28-4	C13910	HMDB0033724	0.3803	0.4512	1.2643	2.7125	1.5626	1.7938	2.313	1.6232	2.0231	0.5087	1.0797	1.0302	1.2598	1.2901	0.3299	0.3299	0.6723	0.3299	0.3299	0.3299	0.9698	0.3299	0.5004	0.3299	0.3367	0.3299	0.4063	0.3299	0.4051	0.9309
12,13-DiHOME	263399-35-5	C14829	HMDB0004705	0.9552	1.1779	0.3892	2.9443	1.6073	2.6705	4.3296	1.0327	1.4566	0.9621	0.6743	0.2843	0.6318	1.1794	0.5253	0.5225	1.6965	1.7251	0.6585	0.9673	3.1453	3.3497	1.6537	0.6199	0.6645	0.5501	1.4338	0.957	0.7629	1.7567
12-HEPE	81187-21-5		HMDB0010202	1.0692	0.8174	0.7369	1.4478	0.4758	2.1234	1.2681	1.0062	0.5053	4.2995	1.0733	1.1145	1.2259	0.4479	0.8653	2.3871	0.9131	1.4907	0.6886	2.0633	1.8711	1.3262	0.7381	0.9496	0.4799	1.5724	0.9938	0.7292	0.393	0.9139
12-HETE	71030-37-0;73837-14-6	C14777	HMDB0006111	1.5208	1.2648	0.7729	0.6628	0.5078	1.0099	0.8415	0.6952	0.399	8.7979	1.0956	0.8542	0.818	0.7338	1.3534	1.937	0.8887	1.5367	0.8029	3.3799	1.1517	1.2922	0.6036	0.9901	0.3766	2.8295	1.7831	1.3199	0.3336	1.2226
12-HHTrE	54397-84-1	C20388	HMDB0012535	1.5585	1.4874	0.604	0.2844	1.0854	0.83	0.6226	0.6409	0.4696	3.653	0.9172	0.6023	1.2307	0.7897	1.0828	1.2441	0.6835	1.2228	0.8653	2.5129	1.2529	1.6447	0.4133	0.8067	0.7396	1.8178	1.5707	1.4113	0.6126	1.4096
13-HODE + 9-HODE		C14767,C14762	HMDB0004667,HMDB0004670	0.9055	0.6427	0.6156	2.2367	1.6542	2.9137	1.7256	0.8891	1.2785	1.2088	1.0694	0.7418	0.9925	1.0075	1.2888	0.7888	1.4484	0.6369	1.0279	0.6377	1.0552	0.9305	0.6061	0.5566	1.022	0.5131	0.5201	1.4018	0.5862	1.5834
14-HDoHE/17-HDoHE			HMDB0010213,HMDB0060044	0.9646	1.0148	0.8618	2.328	0.6096	2.1053	1.4968	1.0106	0.7141	3.7446	1.1115	1.284	1.1728	0.7254	1.0269	3.1665	0.5688	1.124	0.8476	0.9782	0.9907	0.9984	0.5358	0.9936	1.0016	1.0464	1.6011	0.8744	0.5297	0.976
16-hydroxypalmitate	506-13-8	C18218	HMDB0006294	1.042	0.9208	0.599	1.6874	1.0673	1.4335	2.3793	1.2838	1.9158	0.791	0.8157	0.4565	0.5411	1.1181	0.6554	0.8245	1.03	1.2591	0.6644	0.5416	1.5047	1.7341	1.585	0.5299	0.97	0.3762	0.8456	0.5255	1.055	1.1532
18-methylnonadecanoate (i20:0)				0.3107	0.1405	0.1908	0.9713	0.8751	0.8649	1.6814	0.9387	1.2476	0.5556	0.6955	0.6456	0.1405	0.9442	0.1405	2.1974	1.1311	0.1405	1.0389	1.2746	2.342	1.8392	1.5347	0.1405	1.0287	0.1405	0.1405	0.477	1.1127	1.1297
2'-deoxycytidine	951-77-9	C00881	HMDB0000014	1.0186	0.9578	1.0578	0.6509	0.7723	0.6999	0.9828	0.9771	1.0319	0.7211	0.9359	0.7522	1.0869	1.0896	1.1765	1.09	0.9384	1.1117	1.0036	0.9564	0.963	1.1658	1.0238	0.9386	1.0631	0.775	0.9964	1.0838	1.1958	1.1261
2'-deoxyuridine	951-78-0	C00526	HMDB0000012	0.8149	1.2906	0.6779	0.888	1.4139	0.8146	0.7548	0.8233	1.1551	1.453	1.253	0.773	1.1338	1.1998	1.0775	0.6726	1.1057	0.7751	0.7831	0.671	1.8363	1.1078	1.134	0.7712	1.7549	0.3962	2.5074	0.7881	0.9225	1.1118
2'-O-methylcytidine	2140-72-9			0.7671	0.8099	1.1399	1.1319	0.9217	1.1589	0.7851	0.9195	0.8887	1.2576	1.1834	1.0109	1.0352	0.6557	0.828	0.8744	0.916	1.2955	0.9272	0.7948	1.0482	1.0097	1.3694	1.3756	0.9903	1.293	1.2001	0.8538	0.7352	1.1058
2'-O-methyluridine	2140-76-3			0.7095	0.9291	1.0415	1.1486	1.0411	1.2303	0.8046	0.824	1.1499	1.0948	0.9888	1.311	1.2262	0.8799	0.9317	0.7175	0.7985	1.0802	0.9417	0.7875	1.1504	1.0485	1.0112	1.2426	0.8807	1.2211	1.3616	0.8026	0.6029	0.793
2,3-dihydroxy-2-methylbutyrate	14868-24-7		HMDB0029576	1.8711	0.9783	1.1255	0.9856	1.6619	0.6753	1.1407	0.6598	0.4745	1.5261	0.9237	0.9596	0.6269	0.9076	1.9711	2.6173	1.2878	1.7972	1.1717	0.9362	0.4745	0.4745	0.4745	3.2508	0.9657	4.6011	0.9299	1.731	0.5676	1
2,3-dihydroxy-5-methylthio-4-pentenoate (DMTPA)*			HMDB0240388	1.2191	0.9024	1.118	1.023	1.2162	1.2671	0.9973	0.9223	1.1588	1.2858	1.0237	1.2319	1.1257	1.0142	1.2691	0.7003	0.8837	1.0027	0.7468	0.7484	0.725	0.8127	0.841	1.0541	1.0678	0.917	0.7871	0.8944	0.6612	0.8143
2,3-dihydroxyisovalerate	1756-18-9	C04039	HMDB0012141	4.0114	0.8605	0.8844	1.2498	0.9257	2.7922	1.5519	0.9106	0.701	0.7755	0.7838	4.5487	0.587	0.7198	1.3721	0.8649	1.4628	1.0743	1.9309	3.0647	1.8255	0.6104	0.6235	3.6155	0.6831	2.9558	1.8596	3.8113	0.5253	0.825
2,4-di-tert-butylphenol	96-76-4			0.7785	1.4716	0.9523	0.9896	1.0104	1.031	0.8873	0.8078	0.7323	1.0349	0.8274	0.8699	0.8875	0.7268	0.9882	0.8337	1.3668	1.275	1.1259	1.069	1.3741	1.0267	1.1484	1.0423	0.935	1.0586	1.2699	0.9648	0.7436	1.2982
2,6-dihydroxybenzoic acid	303-07-1		HMDB0013676	1.98	1.1654	1.038	0.3976	1.2571	0.904	0.8735	0.6372	1.0099	1.6514	0.9901	1.2151	0.8398	0.9237	2.0101	0.8198	1.2671	1.1234	1.4294	1.241	0.5462	0.2802	0.9353	1.9998	0.9001	1.2952	0.6629	1.8799	0.7718	0.7502
2,8-quinolinediol sulfate				0.048	1.1531	0.048	1.8669	0.8676	1	0.048	0.048	0.5898	1.6471	1.072	0.462	1.24	0.4226	1.2252	0.2714	1.105	2.4485	0.6917	0.048	1.0981	0.5443	0.3857	0.048	0.185	2.6622	1.5109	0.4511	0.5925	1.2767
2-(4-hydroxyphenyl)propionate	938-96-5	C03080	HMDB0041683	0.4105	2.3453	0.4377	2.838	0.681	2.7223	0.7937	0.9283	1.0196	0.4194	0.9804	1.8196	0.3916	0.3916	0.3916	0.3916	1.4744	1.2904	0.876	1.2775	0.3916	0.5365	1.107	2.4245	0.3916	1.3078	0.7898	1.1902	0.3916	0.7087
2-amino-p-cresol sulfate				1.0026	3.3604	0.6451	0.7779	0.4558	0.8793	0.6452	0.6983	1.1207	0.9974	0.3974	0.1258	0.7418	1.3161	0.7259	1.0744	1.6325	2.6576	1.5875	1.3368	1.9384	1.9428	3.6443	0.9454	1.6045	1.3556	0.9222	0.8723	2.176	0.9184
2-aminoadipate	542-32-5;1118-90-7	C00956	HMDB0000510	1.1266	0.7818	0.9239	0.9362	0.6738	2.4323	0.9166	0.6193	0.7477	0.9682	0.9228	2.0466	1.5403	0.9293	1.056	1.0728	0.7564	1.4174	0.8342	0.8674	1.1318	0.7109	2.4175	1.4499	1.3917	1.9542	0.9113	1.0543	1.2332	1.0318
2-aminobutyrate	1492-24-6	C02356	HMDB0000452	0.7229	1.1469	0.853	1.4932	1.157	1.2244	1.0479	0.9552	0.9988	1.2902	1.0002	1.3719	1.1195	0.9998	1.0923	0.8642	0.9417	1.2014	1.2414	0.9747	0.8891	0.838	0.9671	1.323	0.8257	1.3888	0.9821	1.3382	0.9683	0.6825
2-aminoheptanoate	1115-90-8		HMDB0094649	1.9385	0.4768	0.9392	0.9822	1.6243	1.3536	1.2111	1.105	0.8796	2.9298	1.3426	1.6534	0.6323	1.1574	2.1633	0.6924	0.7563	0.7171	1.3963	0.815	0.7434	0.377	0.6528	1.7477	0.829	1.6375	0.5733	1.7985	1.0178	0.5863
2-aminooctanoate	644-90-6		HMDB0000991	0.8496	1.1774	1.4179	1.1507	0.5039	1.7366	0.911	0.8189	1.1611	0.8108	0.613	0.9834	1.6563	1.422	1.4349	0.7966	0.6464	1.3594	0.4943	0.8053	0.8187	1.0632	0.6689	0.8252	1.5334	0.349	1.0166	1.2617	1.8551	1.4141
2-aminophenol sulfate			HMDB0061116	0.3112	1.9728	1.3962	1.135	1.6283	0.3229	1.1327	1.4778	0.5306	1.0077	1.5114	0.3109	0.2112	0.1892	0.4448	0.4377	1.6554	0.8142	1.2116	0.8818	0.3502	0.3215	1.2119	1.6957	0.1033	1.6835	1.3668	1.7197	0.9923	0.7759
2-arachidonoylglycerol (20:4)	53847-30-6	C13856	HMDB0004666	0.4461	0.8163	0.4461	0.4461	0.8463	0.8219	1.7715	0.4461	1.7344	1.2751	0.4461	0.7463	1.0723	0.4461	0.4461	0.4461	1.5865	0.4461	0.4461	0.9277	2.0328	0.4461	0.4461	0.4461	0.4461	1.115	0.4867	0.6086	0.4461	1.1599
2-butenoylglycine	71428-89-2			0.5645	1.2508	0.7101	1.8111	0.6424	0.6747	1.8249	0.9798	0.7871	1.0202	0.5415	0.4305	0.5841	0.7697	0.7426	0.4876	1.2805	2.2229	1.7273	1.3016	1.4005	1.5472	1.2939	1.4507	0.6578	3.0154	1.7723	0.6134	0.4132	1.4495
2-hydroxy-3-methylvalerate	488-15-3		HMDB0000317	0.2528	1.6279	0.3393	0.518	0.3715	0.4459	0.3568	0.1789	0.5182	0.4772	0.3155	0.4289	0.6294	0.4797	0.9036	1.4827	1.0619	1.3723	1.071	1.0141	1.8256	1.7045	1.4149	1.014	1.7147	0.9874	1.256	1.0126	1.2047	1.0776
2-hydroxy-4-(methylthio)butanoic acid	583-91-5		HMDB0037115	0.6833	1.2732	2.5847	0.455	1.5512	0.7832	0.5303	0.2523	1.0585	1.0047	0.6258	0.6191	0.5963	1.3961	2.3767	0.8551	1.2164	0.9953	1.2305	1.6885	0.7537	0.7214	1.3907	1.2943	0.9227	1.7232	0.7289	1.0867	0.5025	1.3213
2-hydroxyadipate	18294-85-4	C02360	HMDB0000321	1.1899	1.9501	0.643	0.5932	0.9248	1.6178	0.8557	0.6254	0.7656	1.3387	0.851	0.8054	0.9198	0.4875	1.1754	0.6436	1.5819	1.8835	2.0269	1.4966	0.9145	0.5557	2.862	2.2116	0.606	2.5521	1.0752	1.6141	0.7561	1.3192
2-hydroxyarachidate*				0.4615	2.4256	0.3161	0.8046	0.5083	0.9635	1.2668	0.8314	0.7593	0.7158	0.566	0.7863	0.3089	0.8294	0.4616	1.0451	1.5418	2.0553	0.9817	1.5724	2.6606	2.525	2.4933	1.6996	1.0183	3.0101	1.7767	1.1469	1.3494	0.8847
2-hydroxybutyrate/2-hydroxyisobutyrate		C21297,C05984	HMDB0000729,HMDB00008	1.2188	1.4349	0.8664	0.9705	1.4306	0.7807	1.2145	0.8248	0.9257	1.3783	1.0616	0.6727	0.7373	0.8187	1.1949	0.7027	1.0682	0.9349	1.6535	1.6175	0.9813	0.947	1.3951	1.4888	1.0017	1.7752	0.9556	1.1804	0.5787	0.9983
2-hydroxydecanoate	5393-81-7		HMDB0094656	0.6677	1.084	1.0369	1.1321	1.9257	1.8371	1.7643	0.8564	1.5228	1.0076	1.4975	1.0684	0.852	1.2519	0.6981	0.9924	1.0747	0.7794	0.5701	0.9743	1.1497	1.092	1.3161	0.6739	0.9106	0.5834	0.8736	0.8073	0.7749	0.6558
2-hydroxyglutarate	40951-21-1	C02630	HMDB0059655	1.2712	1.3229	0.8645	0.7769	1.1997	0.8928	1.0365	0.6767	0.9097	1.2878	0.8835	0.9678	0.9631	0.8044	0.987	1.013	1.0775	1.195	1.2613	1.1558	0.882	0.6389	1.2805	1.6489	0.8181	1.723	0.8859	1.0285	0.577	1.0832
2-hydroxyhippurate (salicylurate)	487-54-7	C07588	HMDB0000840	1.0352	5.1855	0.6132	0.2755	1.3171	1.3839	0.4095	0.7922	1.8899	2.2223	1.8237	0.9648	0.325	0.5102	2.0052	0.7904	1.796	0.8432	0.8355	3.1258	0.2251	0.2251	2.5521	2.746	0.2251	1.4746	0.3393	2.1207	0.4594	0.9304
2-hydroxylaurate	2984-55-6			0.914	0.9931	0.8828	1.2347	1.0018	1.5345	1.8829	0.8029	1.1263	1.1138	1.0303	0.7586	0.8847	0.7981	0.67	1.6888	0.9382	1.0661	0.5514	0.5936	1.4567	1.3501	1.8645	0.8514	0.4386	0.9982	1.5162	0.6816	1.0695	1.409
2-hydroxyoctanoate	617-73-2		HMDB0002264	0.9711	1.1955	1.6341	0.8795	1.4083	1.565	1.6501	0.7956	1.9668	1.3271	1.4202	0.905	1.1889	1.4552	0.8453	0.8678	0.8113	0.9436	0.873	0.7332	0.8093	0.8652	1.1583	1.2589	1.6254	0.8598	0.8892	1.2953	1.0148	0.9852
2-hydroxyoleate	56472-29-8			0.2888	1.552	0.5644	1.801	0.8643	1.2631	1.108	0.9862	0.6026	0.4658	0.6254	0.7814	1	0.5562	0.2888	1.532	1.2303	1.9364	0.6106	0.7458	1.7559	1.9157	1.656	1.5803	0.9377	1.3992	1.5269	0.7564	0.8897	1.15
2-hydroxypalmitate	764-67-0		HMDB0031057	0.9334	0.9104	1.0774	1.4295	1.073	1.2283	1.6747	1.3842	1.3334	0.9167	1.067	0.9548	0.9536	1.15	0.8937	0.9863	0.7959	1.1805	0.728	0.5814	1.1203	1.3468	1.5403	0.7843	0.9978	0.5738	0.8806	0.9973	1.2941	1.0022
2-hydroxyphenylacetate	614-75-5	C05852	HMDB0000669	1.5149	1.8455	1.4014	1.4192	0.9181	1.1048	0.8376	1.1541	1.921	1.3493	1.0695	1.3119	1.6479	0.8992	1.9181	0.9305	0.7729	0.9298	0.9072	1.214	0.5474	0.2703	0.2703	0.2703	0.863	0.7349	0.7134	1.2849	0.8188	0.9302
2-hydroxysebacate	103963-71-9		HMDB0000424	0.8818	1.9961	0.8748	0.3764	1.2311	0.3958	2.348	0.8739	0.8235	1.8204	1.3103	0.3997	0.4729	0.6936	1.0146	0.4466	0.7919	1.7247	1.1103	0.9854	1.2762	0.7277	1.2463	1.2023	1.0671	2.2969	1.8965	1.1614	0.9568	0.8583
2-hydroxystearate	629-22-1	C03045,C03042	HMDB0062549	0.8984	0.9621	1.2988	1.3476	1.0453	1.2115	1.458	1.5525	1.2678	0.9871	1.1938	1.1366	1.0061	1.5957	0.9726	0.6025	0.8759	0.9116	0.7185	0.6999	0.969	0.9694	0.9939	0.5837	1.0981	0.4936	0.7986	1.0792	1.07	1.1651
2-isopropylmalate	3237-44-3	C02504	HMDB0000402	1.5396	2.0718	2.9828	0.4257	1.1318	0.6096	0.5097	0.3571	1.1132	0.837	1.192	2.7228	1.4164	0.4995	0.9278	1.0722	0.8802	0.6486	1.1922	1.8395	0.1417	0.314	1.2938	2.5574	0.4696	1.9573	0.7272	1.4299	0.4232	0.4439
2-keto-3-deoxy-gluconate	17510-99-5	C00204	HMDB0001353	2.4443	0.3827	3.0772	0.4369	0.9148	0.6378	0.9111	2.516	0.9573	0.2413	3.388	2.011	0.7672	2.126	1.1301	0.98	1.1481	0.5367	1.8448	0.5404	1.1617	1.188	2.1258	0.2413	2.4302	0.2413	0.8001	0.7594	1.02	0.6563
2-linoleoylglycerol (18:2)	3443-82-1		HMDB0011538	0.7943	1.608	1.229	0.9066	0.8696	0.9866	1.3271	0.9165	1.0789	1.2546	0.8178	0.8553	1.3174	1.0814	1.0134	1.0528	1.0913	0.8754	0.9006	0.7286	1.5122	1.4888	1.4316	0.9302	1.0312	0.8515	1.0427	0.7548	0.7435	0.932
2-methoxyhydroquinone sulfate (1)				1.4541	1.0625	1.659	0.4026	1	1.8951	1.6979	0.473	1.5995	1.1564	0.7499	4.8327	2.5408	0.7894	3.8311	1.5434	0.5099	0.9325	0.8449	0.6808	0.918	0.2411	0.7352	1.4915	0.4405	2.0831	1.0195	0.7939	0.8568	0.2411
2-methoxyhydroquinone sulfate (2)				1.2148	0.7377	1.8693	0.4164	0.741	1.4482	1.6198	0.4164	1.2622	1	0.7551	4.8329	2.3583	0.5976	2.56	1.936	0.4164	0.9789	0.4164	0.8527	0.8749	0.4164	1.0925	1.3269	0.4499	1.8384	0.8903	0.7508	0.753	0.4164
2-methylbutyrylcarnitine (C5)	31023-25-3		HMDB0000378	1.6269	1.1389	0.9086	1.8591	0.5184	0.9775	1.7369	0.7567	1.4093	2.0698	2.069	0.5184	0.9898	0.7665	1.3221	0.8062	0.893	0.5184	1.0102	2.1626	0.9774	0.8934	1.8861	2.1332	0.8873	3.004	0.6545	0.727	1.0567	0.8867
2-methylbutyrylglycine (C5)	52320-67-9		HMDB0000339	1.2584	1.3808	0.7467	1.832	1.4842	0.5264	1.3748	0.4679	0.9679	1.3438	1.0659	0.4159	1.0267	0.5227	1.011	0.3306	1.1323	0.989	0.8527	1.3296	0.9078	0.7447	1.4831	1.273	0.6625	2.1573	0.891	0.5961	0.4145	1.075
2-methylcitrate/homocitrate		C01251	HMDB0003518,HMDB0000379	1.2241	1.3734	0.9078	0.7697	1.0274	0.9784	0.8507	0.7457	0.9769	1.0004	1.1569	1.5523	1.0875	0.9287	0.9996	0.867	1.3792	1.3909	1.335	1.289	0.6788	0.7442	0.8897	1.6737	0.8941	1.4379	0.6697	1.3527	0.8664	1.0208
2-O-methylascorbic acid	17860-87-6		HMDB0240294	0.919	1.3438	0.7777	0.7345	1.0134	0.8937	0.8455	0.8538	0.8525	0.9866	0.7467	0.6015	0.8179	0.7245	0.7409	1.0583	1.2752	1.3592	1.1433	1.1564	1.0919	1.2473	1.7526	1.4459	1.0218	1.2291	1.0492	0.8672	0.5896	1.555
2-oleoylglycerol (18:1)	3443-84-3		HMDB0011537	0.8669	1.2965	1.4076	0.8	1.0208	1.148	1.0753	0.8515	1.131	1.362	0.8467	0.7655	1.0059	0.9829	0.9941	1.1785	0.9768	0.937	0.8296	0.7673	0.74	1.0789	1.3083	1.1085	1.1965	0.6966	0.8018	0.8052	1.1713	1.0293
2-oxindole-3-acetate	2971-31-5		HMDB0035514	1.8302	1.8272	1.5577	0.1752	0.7579	2.6005	2.3182	0.815	1.2787	0.9145	0.961	1.4452	1.0674	0.4316	0.8519	0.8806	1.5781	2.4453	0.9229	1.1205	0.5125	0.7897	1.991	2.5831	0.4346	2.1088	0.6266	1.039	0.3269	0.6142
2-oxoadipate	3184-35-8	C00322	HMDB0000225	1.3155	1.2974	0.7905	0.4721	0.4087	2.2711	0.9304	0.3449	0.7033	0.472	0.9355	1.5757	1.6162	0.8197	1.0715	1.0645	0.7473	2.381	0.8901	0.8321	0.7816	0.728	5.4736	1.2296	1.8146	2.2633	0.559	1.3015	1.1751	1.4148
2-oxoarginine*	3715-10-04	C03771	HMDB0004225	1.1439	1.1975	0.9071	0.6843	1.3501	0.8669	1.0629	0.7604	0.879	1.1516	1.1651	0.8964	0.8667	1.0359	1.0676	0.6974	1.0897	1.0772	1.0626	0.9641	0.7716	0.7397	1.0703	1.1934	0.9435	1.3812	0.8722	1.1635	0.592	0.9176
2-palmitoleoyl-GPC* (16:1)*			HMDB10383	0.9644	2.0252	1.3966	0.4361	0.5759	0.6949	0.5376	1.3729	1.5551	1.0175	1.1404	0.6449	0.5974	0.6715	0.6473	1.6644	0.9102	0.9825	1.0497	1.2939	1.1332	0.9315	1.6362	1.3802	0.9085	1.0758	0.9423	0.915	1.645	2.1022
2-palmitoleoylglycerol (16:1)*			HMDB0011534	1.1378	1.858	0.66	0.3886	0.3886	0.3886	0.3886	0.7188	0.6683	1.1555	0.575	1	0.3886	0.6296	1.0283	1.2462	0.3886	0.3886	0.3886	0.6014	0.3886	1.309	1.6235	0.927	0.7364	0.877	0.3886	1.5103	1.6767	1.8278
2-palmitoyl-GPC* (16:0)*			HMDB0061702	1.0054	1.2554	1.0961	0.769	0.7811	0.8914	0.9137	1.1417	0.9506	1.1417	0.9716	0.7592	0.9871	0.9363	0.8972	1.0996	1.0275	1.0823	1.1184	0.9756	1.1561	0.9946	1.3591	1.195	1.0099	0.9376	1.1692	0.989	0.9142	1.0945
2-palmitoylglycerol (16:0)	23470-00-0		HMDB0011533	0.2887	0.8897	0.7453	0.9298	1.0325	1.048	1.0974	0.7703	0.4142	0.5542	0.9362	1.3703	1.3372	1.0849	0.9675	0.8788	1.2358	0.6003	0.4957	1.3909	0.8808	1.359	1.6112	1.3371	1.4638	0.7997	0.4616	1.9865	1.7611	2.2544
2-pyrrolidinone	616-45-5		HMDB0002039	0.6545	0.8535	1.0179	1.1298	1.4281	1.6392	1.4441	1.0295	0.5783	1.0351	0.9169	1.1446	1.1115	0.9821	0.9807	0.8805	0.9628	1.2384	1.0987	1.066	0.7754	0.7178	0.9355	1.2219	0.5679	1.4036	0.7993	0.8753	0.7217	1.135
2-stearoyl-GPE (18:0)*			HMDB0011129	1.0471	1.0806	1.2419	0.8489	0.9598	0.8987	0.9875	0.9275	1.0122	0.9743	0.941	0.8333	0.8779	1.1434	1.0023	0.9673	1.0772	1.0779	0.9591	0.8138	1.0844	1.0513	1.1905	1.1085	1.1031	0.7927	1.1481	0.9977	0.982	1.0058
2R,3R-dihydroxybutyrate	759-06-8		HMDB0000498	0.7373	1.2051	0.7152	0.7761	0.6281	0.7879	0.6449	0.5612	0.7908	0.78	0.765	1.1175	1.0051	0.7338	0.6625	1.199	1.0435	1.2404	1.2081	1.0124	1.3571	1.1609	1.1918	1.0362	1.0695	1.3598	1.0865	0.8963	0.922	0.9949
2S,3R-dihydroxybutyrate	5057-93-2		HMDB0002453	0.9069	1.148	0.5839	0.9102	0.7867	0.7987	0.5389	0.5527	0.5414	0.9789	0.6851	1.3874	1.2404	0.7014	0.7949	1.3491	1.1169	1.268	0.823	1.0247	1.4456	1.711	1.0211	1.29	1.145	1.3745	1.4804	1.2215	0.788	0.9561
3,4-dihydroxybutyrate	51267-44-8		HMDB0000337	1.4552	0.9746	1.0347	0.8797	1.0631	0.7354	0.8486	0.9353	0.8679	1.0138	1.0417	1.1672	1.2159	0.9874	1.1658	1.1523	0.9569	1.1572	1.0252	0.9432	0.8973	1.02	0.8445	1.0126	0.8805	1.0262	0.9591	1.1621	0.7428	0.8876
3,5-dichloro-2,6-dihydroxybenzoic acid				0.941	1.2154	1.11	1.0917	0.8913	1.402	0.8143	1.0082	0.9849	0.9086	0.876	0.9756	0.9311	0.9248	0.8846	1.0722	1.0799	1.1908	0.9642	1.2772	0.962	1.0525	1.2384	1.2488	0.7342	1.101	1.0246	0.9918	0.799	1.2103
3-(3-hydroxyphenyl)propionate	621-54-5	C11457	HMDB0000375	1.3803	0.6506	0.7738	0.4168	0.9077	0.888	0.8629	1.6455	0.7803	0.4168	0.6889	0.4168	0.4168	0.4168	0.6618	0.4168	2.5061	1.3931	1.4419	1.862	0.4168	0.4168	0.9262	1.8196	0.4168	1.8589	1	1.0167	0.4168	1.2009
3-(3-hydroxyphenyl)propionate sulfate	86321-32-6		HMDB0094710	0.8336	1.1114	1.7374	0.5913	1.236	0.8505	1.292	1.3389	0.4425	0.4829	1.0929	0.1987	0.2349	0.2931	0.7183	0.4872	2.4625	1.9637	1.4204	1.9169	0.2214	0.2582	0.9071	1.6191	0.0256	4.9029	1.7121	1.3648	0.2902	1.1687
3-(4-hydroxyphenyl)lactate (HPLA)	6482-98-0	C03672	HMDB0000755	1.3943	1.2713	0.7778	0.6592	1.2761	0.7553	1.2262	0.8828	0.9757	1.1325	0.9336	0.6466	1.0905	0.905	1.0019	0.5598	1.1009	1.4426	1.0907	1.1045	0.8585	0.7014	1.0572	1.3339	0.9981	1.6036	0.8527	0.9519	0.4992	1.2577
3-(4-hydroxyphenyl)propionate	501-97-3	C01744	HMDB0002199	0.5192	1.984	1.0276	0.6884	0.8268	0.4058	1.0363	0.4927	0.4058	1.0689	1.3247	0.4878	1.0633	0.4058	1.355	0.6195	1.7216	0.7906	1.376	1	0.4058	0.4058	0.7064	2.5537	0.4438	2.1472	0.7657	1.1887	0.4058	0.4269
3-acetylphenol sulfate				1.1805	4.7926	0.945	0.2907	0.6029	0.5409	0.6429	0.65	1.2535	0.2907	0.5738	0.5185	0.573	0.4156	0.4226	1.7942	5.2774	7.8535	1.2919	3.1027	1	0.9831	2.8736	4.0597	0.6741	7.4399	2.515	1.351	0.6755	2.4992
3-amino-2-piperidone	1892-22-4		HMDB0000323	1.395	0.8913	0.7121	0.5724	1.2413	0.9242	0.997	0.8174	0.7621	1.5322	0.8676	0.6543	1.0685	1.003	1.1845	1.2144	1.119	1.6476	1.1897	1.4002	0.8037	0.5666	0.776	2.5297	1.0481	1.3671	0.7781	1.3967	0.6161	0.6938
3-aminoisobutyrate	10569-72-9;214139-20-5	C05145	HMDB0002166	1.3803	0.548	0.548	1.2258	0.7489	0.548	1.0149	0.548	1.3105	1.1625	0.6686	0.548	1.1624	0.6778	1	0.548	0.548	0.63	0.7588	0.548	1.0435	0.548	0.7932	2.2252	0.548	1.4532	0.7021	0.7898	0.548	0.548
3-bromo-5-chloro-2,6-dihydroxybenzoic acid*				0.7573	1.2315	0.9488	1.251	0.9552	1.4486	0.7666	0.9558	0.9053	1.0011	1.0054	0.9993	0.8006	0.9558	0.8329	1.0119	1.1059	1.1256	1.0007	1.0774	0.987	0.9701	1.0671	1.2428	0.7623	1.4427	1.058	0.9324	0.8305	1.2272
3-carboxy-4-methyl-5-pentyl-2-furanpropionate (3-CMPFP)			HMDB0061643	2.7342	0.9485	2.3545	2.4302	2.0692	1.6568	2.6026	1.865	1.8454	1.6563	1.3631	1.5234	2.0149	1.6073	1.2929	0.5076	0.7572	0.7916	0.8855	0.7915	0.9311	0.8138	0.762	1.0515	0.7219	0.6749	0.5548	0.8854	0.6865	0.79
3-dehydrocholate	2304-89-4		HMDB00502	0.4035	0.5899	0.7033	1.0088	0.4035	0.4035	1.6686	0.4035	0.9912	0.4035	0.4035	1.6803	0.4035	2.5156	1.1847	0.6602	0.4035	0.4035	0.4035	0.4035	0.5863	0.4035	0.4035	0.4035	0.4035	0.4035	1.7453	0.4035	0.4035	0.4035
3-formylindole	487-89-8	C08493	HMDB29737	1.577	1.1095	1.345	0.924	1.3126	1.1693	1.3308	1.1921	1.2046	2.0681	1.32	1.1805	1.2817	0.8507	1.261	0.7597	0.8257	0.6123	0.8031	0.8595	0.4082	0.6627	0.7569	0.9984	0.6963	1.0166	0.5937	1.0016	0.5906	0.9513
3-hydroxy-2-ethylpropionate	4374-62-3		HMDB0000396	1.1015	1.5854	1.0072	1.0131	0.7081	1.0499	1.1906	0.7123	0.8769	0.5967	0.7746	1	1.2073	1.2882	1.1819	0.6859	0.7678	1.1129	1.296	0.6976	0.8609	0.5967	0.9576	1.2845	1.2561	1.1561	0.7194	0.8673	0.8993	0.7634
3-hydroxy-3-methylglutarate	503-49-1	C03761	HMDB0000355	0.7763	1.1982	0.9998	1.2838	0.9569	0.9213	1.1661	0.7923	0.7988	1.0262	0.7243	0.9869	0.9982	0.6092	0.7913	1.0191	1.4551	1.2462	1.1404	1.1272	0.8169	1.0002	1.4472	2.0392	0.8363	2.0927	1.7544	0.9199	0.6977	1.2592
3-hydroxyadipate			HMDB0000345	0.8911	3.2402	0.5714	1.3055	1.0543	1.3918	1.0722	0.7456	0.99	1.1914	0.7365	1.3128	1.2318	0.5506	0.7103	0.8685	0.9644	0.8138	1.2169	0.968	1.7171	1.1331	1.798	1.3136	0.5224	1.3775	0.8825	0.5702	0.4288	1.01
3-hydroxybutyrate (BHBA)	625-72-9	C03197,C01089	HMDB0000011,HMDB0000357,HMDB0000442	0.5159	0.8391	0.5427	4.7368	1.0504	1.7394	3.8647	1.5811	1.052	0.9813	0.8381	1.3472	0.7398	0.7579	0.6052	0.6036	1.0265	1.2701	0.6151	1.0187	1.4856	1.8781	1.304	0.7313	0.5709	1.7254	1.3083	0.9605	0.5722	0.9132
3-hydroxybutyroylglycine				0.4786	1.6924	0.7314	2.0974	0.9281	0.6691	3.0705	1.3651	1.5601	0.8403	0.6223	0.9422	1.3908	0.6941	0.5239	0.6916	0.7782	1.6222	1.171	1	1.5184	1.9517	1.5536	1.3653	0.7457	2.4544	0.8953	0.5862	0.4786	1.0836
3-hydroxydecanoate	5561-87-5		HMDB0002203	0.4752	0.8033	0.8798	1.4546	1.3391	2.3603	2.2675	1.2374	1.508	0.8823	0.6729	1.0344	0.6704	0.9656	0.5616	3.3348	0.6946	1.2728	0.7394	0.5869	2.0128	3.1766	1.8209	0.5649	0.957	0.6232	1.1809	0.4251	1.4188	1.2549
3-hydroxydecanoylcarnitine			HMDB0061636	0.439	0.9235	0.8251	1.6192	1.282	1.7739	1.7284	0.7221	1.03	1.4537	0.6547	0.6166	0.6682	0.97	0.5851	2.3686	0.9231	1.5693	0.5702	0.7813	1.5126	2.0471	1.3032	0.6885	0.772	1.241	1.1422	0.4658	1.0317	1.4594
3-hydroxyhexanoate	10191-24-9		HMDB0061652,HMDB0010718	0.5716	1.0004	0.8081	2.2567	1.3322	2.2911	2.0537	1.0768	1.2587	0.8046	0.8859	0.6892	0.7469	0.7449	0.5606	1.0895	0.7061	1.2618	0.6655	0.8156	1.1852	1.4685	1.9372	0.9996	1.0442	1.935	1.1007	0.3464	0.8843	0.83
3-hydroxyisobutyrate	2068-83-9	C01188,C06001	HMDB0000023,HMDB0000336	0.8766	1.2887	0.8823	1.151	1.1225	1.4163	0.9231	0.5407	0.6881	0.9206	1.048	1.114	0.9619	0.684	0.7833	0.7558	0.7028	1.7991	1.1048	1.1926	1.1113	1.1558	0.7644	1.5984	0.7914	1.7571	1.094	0.8795	0.3947	1.0381
3-hydroxylaurate	53941-38-1		HMDB0000387	0.4192	0.8941	0.9285	1.8195	1.242	2.4728	2.1406	1.2268	1.7751	0.8401	0.6757	0.8019	0.669	1.0715	0.4898	3.5836	0.5971	1.3723	0.7786	0.4565	2.3104	3.9148	2.147	0.5542	0.8806	0.5906	1.327	0.3648	1.4487	1.4623
3-hydroxymyristate	3422-31-9			0.5406	0.9401	1.0021	1.9356	1.1026	2.4081	2.3287	1.2039	2.0123	0.8264	0.7452	0.736	0.5986	0.9979	0.5926	2.8793	0.6652	1.3307	0.7735	0.5881	2.4596	3.2715	2.0492	0.5327	0.9334	0.6225	1.221	0.4552	1.2808	1.1774
3-hydroxyoctanoate	88930-08-9	C20793	HMDB0001954	0.5494	0.8825	0.9927	1.8696	1.419	2.4415	2.9229	1.6849	1.641	0.9161	0.8431	0.9536	0.7073	0.9484	0.5528	2.8447	0.9569	1.1798	0.6591	0.5904	2.2743	3.2198	1.787	0.801	1.1386	0.9126	1.0073	0.4485	1.4131	1.1989
3-hydroxyoctanoylcarnitine (1)				0.4715	1.1795	0.8798	1.5196	0.9607	1.6097	2.5664	0.7465	1.4022	1.1509	0.8036	0.6289	0.6219	0.8711	0.4715	2.3575	0.9158	1.5804	0.5489	0.8251	1.474	1.8914	0.9562	1.0064	1	1.4555	1.0601	0.5068	0.9866	1.5612
3-hydroxyoctanoylcarnitine (2)				0.6273	0.6273	0.9761	0.6273	0.6273	2.179	1.74	0.6273	1.0239	0.6273	0.6273	0.7572	0.6273	0.8688	0.6273	1.2597	0.8896	1.1659	0.6273	0.6273	1.2804	0.6273	0.6273	0.7474	0.6273	1.2117	0.6273	0.6273	0.7501	0.6273
3-hydroxyoctanoylglycine				0.1771	2.77	0.449	1.0653	0.3288	0.4924	1.2456	0.9347	0.8458	0.1787	0.1835	0.2873	0.1771	0.6054	0.1771	1.6334	2.0091	6.3023	0.7658	1.2457	2.893	5.2175	1.7663	1.5561	0.7203	2.3943	2.6067	0.4801	0.7433	2.8011
3-hydroxyoleate*				0.9191	0.9802	1.0198	2.4174	1.1098	2.2332	2.6641	1.4145	2.8118	0.9114	0.9118	0.6342	0.8283	1.1188	0.5065	0.5065	0.6234	1.2044	0.7652	0.6566	2.2568	2.5694	2.7812	0.5333	0.716	0.5961	0.8838	0.5065	1.312	1.1545
3-hydroxyoleoylcarnitine				0.4371	1.1831	0.847	2.0293	1.0196	1.7206	1.7797	0.8917	1.4046	0.9804	0.9042	1.0398	0.9644	1.2629	0.4596	2.4806	0.6168	1.3362	0.4611	0.708	1.2496	1.4577	1.0712	0.512	0.6292	0.7317	1.0402	0.3435	0.6611	1.3846
3-hydroxypalmitate	928-17-6		HMDB0010734	1.3906	0.7769	1.0838	0.9193	1.0723	1.3592	1.7464	1.022	1.9728	1.1111	0.8877	0.6642	0.5267	1.313	0.6434	1.5795	0.7972	0.978	0.833	0.7487	1.2469	1.5368	1.5143	0.6988	1.3824	0.6879	0.6716	0.4798	1.2244	0.6786
3-hydroxypalmitoylcarnitine			HMDB0013336	0.7154	1.2266	0.9341	1.5138	1.0999	1.5499	1.6537	0.8398	1.2525	1.7851	0.8702	1.0171	0.935	1.3156	0.7331	2.7275	0.7906	1.3821	0.6769	0.9829	1.3177	1.6485	1.1611	0.7263	0.7513	0.9408	0.8789	0.5581	0.7691	1.5431
3-hydroxypyridine sulfate	1955-23-3			2.6296	1.0236	3.883	0.3491	2.0682	0.8998	0.5698	0.7323	0.7131	1.685	1.2918	3.6123	2.8436	0.9764	2.1337	1.7122	0.8931	0.8257	1.445	1.4817	0.2649	0.2121	0.6145	2.3937	0.7219	2.5084	0.5384	1.6084	0.5592	0.3761
3-hydroxystearate	45261-96-9		HMDB10737	1.576	0.749	1.8294	1.4771	1.2675	2.0446	2.9385	1.1981	2.427	1.01	0.6274	0.481	0.3376	1.5499	0.5862	1.4681	0.7256	0.7735	0.7992	0.4303	1.5672	0.99	1.2273	0.4031	1.163	0.3615	0.7757	0.5138	1.2387	0.7737
3-indoleglyoxylic acid	1477-49-2			1.9384	1.2182	1.0558	1.1493	1.4212	0.8692	1.266	1.0243	1.4211	1.9534	1.2865	1.0492	1.3978	0.6773	1.5091	0.6028	0.9757	0.6113	0.9625	0.9456	0.3195	0.515	0.6837	1.2818	0.7978	0.8263	0.5554	1.2652	0.601	0.9303
3-indoxyl sulfate	2642-37-7		HMDB0000682	1.2673	0.9987	1.8128	1.8161	1.4139	1.4257	1.597	1.3981	1.646	1.1421	1.3512	0.8563	1.4268	1.0734	1.3392	0.4164	0.8475	0.7241	0.8388	0.8859	0.9885	0.4637	0.7453	1.0377	0.6569	0.7406	0.4947	1.0013	0.5911	0.724
3-methoxycatechol sulfate (2)				0.7187	1.838	1.5587	0.574	1.6281	0.3023	0.8681	1.3649	0.4486	1.2223	1.7441	0.9314	0.4518	0.3076	0.6865	0.5663	1.4447	1	1.2548	1.0054	0.2468	0.2198	1.1863	2.2678	0.2198	2.0195	1.0698	1.7492	0.7395	0.544
3-methoxytyrosine	300-48-1		HMDB0001434	0.99	0.8276	0.9101	0.9828	1.2164	1.229	1.1647	0.867	1.0122	0.9395	1.1186	1.0281	0.8845	1.2484	1.5408	0.7283	0.7672	0.9772	1.2434	0.7916	1.01	0.9059	0.7465	1.096	1.1502	0.6461	1.0309	1.3689	1.0991	0.6726
3-methyl catechol sulfate (1)				2.0298	0.6178	1.5196	0.5397	1.1793	0.4531	0.4144	0.8533	0.2764	1.1898	1.117	2.6238	1	0.2323	0.6968	1.2365	1.1428	0.8235	1.2569	1.104	0.1874	0.1874	0.3035	2.3171	0.231	2.2184	0.7125	1.7498	0.1874	0.1874
3-methyl-2-oxobutyrate	3715-29-5	C00141	HMDB0000019	0.7592	1.0456	1.3084	0.9595	0.8093	1.0704	0.9322	1.2961	0.7214	0.8673	0.9942	1.1174	0.8586	0.6973	0.6694	1.0531	0.8609	1.2415	1.087	0.8389	1.0001	1.9185	1.4072	0.9099	1.0322	1.1951	1.0244	0.8187	1.0678	0.9999
3-methyl-2-oxovalerate	1460-34-0;51829-07-3	C00671,C06008,C03465	HMDB0000491	0.6433	1.2669	1.5207	1.0376	0.7491	1.2346	1.0229	1.2088	0.9554	0.9828	0.9849	1.0715	0.8751	0.8303	0.7917	1.1755	0.8205	1.1605	1.1127	0.9893	1.0142	1.6241	1.1616	0.8255	0.7809	1.1743	1.0107	0.6915	0.9383	0.9215
3-methyladipate	3058-01-03		HMDB0000555	0.8354	2.3311	0.923	0.6252	0.5583	1.4794	0.8602	0.8099	1.28	0.3421	0.9476	0.8219	0.5088	0.8455	0.6718	1.3031	3.0206	2.7912	1.0524	1.2145	2.6997	2.0524	4.072	1.1928	0.3755	1.7761	1.9606	0.74	0.8074	1.1045
3-methylcrotonylglycine	33008-07-0	C20828	HMDB0000459	1.0193	3.1555	1.0972	1.1105	0.6583	0.4622	1.2421	0.9343	0.9589	0.9258	0.7819	0.9101	0.8459	0.7896	1.0033	0.7349	1.5111	2.6055	0.6471	1.7239	0.9221	1.1426	1.6073	1.6968	1.2392	1.6774	0.9967	0.8848	0.8186	1.4555
3-methylcytidine	21028-20-6		HMDB0240577	1.109	1.0392	0.5376	0.5376	0.7077	0.5376	1.0602	0.6289	1.2678	0.5376	0.7831	0.5376	1.3121	1.1272	1.1811	1.2816	0.6612	0.8598	0.8945	0.9136	0.9371	1.0122	1.1209	1.0189	0.9878	0.6934	1.9188	0.9	0.9419	1.036
3-methylglutaconate	5746-90-7		HMDB0000522	1.164	1.6565	0.8658	0.9533	1.4177	0.9673	1.1216	0.8246	1.2404	1.3064	1.2288	1.1418	1.0419	0.9893	1.0107	0.5979	1.2842	0.9749	0.8865	1.2151	0.7713	0.7053	0.8556	1.5397	0.8915	1.27	0.7071	1.2525	0.4886	0.7469
3-methylglutarate/2-methylglutarate			HMDB0000752,HMDB0000422	1.0429	1.3014	0.7616	0.8503	1.3872	1.0602	0.9743	0.6993	1.1142	1.0687	0.9269	1.0374	0.844	0.7205	0.9209	0.9401	1.1241	1.0586	1.0141	0.9859	0.9638	0.9213	1.1308	1.2048	0.7711	1.1677	1.0503	0.9626	0.523	1.023
3-methylhistidine	368-16-1	C01152	HMDB0000479	1.0209	0.606	1.2268	1.0416	0.8149	0.839	0.9351	1.0795	1.2584	1.3438	1.3125	1.105	0.953	1.1428	1.3196	0.788	0.8648	1.3554	1.0738	0.9077	1.0381	0.9521	0.9869	1.0131	0.9704	0.8737	0.7514	0.7019	0.7644	1.2735
3-phenylpropionate (hydrocinnamate)	501-52-0	C05629	HMDB0000764	0.3491	1.2265	0.7035	1.5559	1.5539	0.7771	0.7063	1.0291	0.4155	1.031	1.863	1.239	0.1957	0.2586	0.4834	0.7083	1.3487	1.2643	1.368	1.0933	0.2301	0.471	1.8954	1.7038	0.0911	3.5325	0.9709	1.1222	0.5954	0.5033
3-phosphoglycerate	80731-10-8	C00597	HMDB0000807	0.6328	2.6695	0.6134	2.1399	1.4065	0.9559	1.0838	0.4428	0.414	6.8837	0.571	0.1675	2.3224	0.5135	1.0441	2.5148	0.4185	0.8892	0.6472	1.376	0.5749	0.2989	0.445	4.7933	1.048	2.8762	0.7413	2.044	2.4907	1.4117
3-ureidopropionate	462-88-4	C02642	HMDB0000026	1.1636	1.1215	0.6801	0.9513	2.0733	0.9618	1.2785	1.0617	1.0961	1.2765	1.326	1.0012	0.992	0.6777	0.8529	0.5976	1.1861	1.4067	0.9988	1.1113	0.5744	0.7063	1.1329	1.594	0.6916	2.285	0.7558	0.9485	0.3625	0.9249
4-acetamidobenzoate	556-08-1	D03836		0.6425	1.5381	0.939	1.2335	1.0341	0.7669	1	1.1356	0.6937	0.975	1.5943	1.1043	0.4044	0.3047	0.8483	0.7655	2.2074	1.5439	1.3581	1.6092	0.4852	0.7637	2.3811	2.5321	0.3047	1.9474	0.7668	1.7397	0.5147	0.6034
4-acetamidobutanoate	3025-96-5	C02946	HMDB0003681	1.6372	1.2589	0.6311	0.6545	0.646	1.0003	1.6606	0.8147	1.1606	1.1374	1.0516	0.9302	1.0509	0.6832	1.042	1.1117	1.1055	1.0067	0.9997	0.6819	0.7465	0.6141	1.2475	1.1671	0.8602	1.1937	0.7686	0.6681	0.5838	0.7899
4-acetylcatechol sulfate (1)				1.018	1.8124	1.5605	0.808	2.0052	0.2666	1.0672	1.558	0.374	1.3571	2.2258	0.6153	0.3646	0.2394	0.5354	0.5826	1.5382	1.6697	0.9207	0.7949	0.3615	0.2943	1.3136	2.3526	0.1815	3.2843	1.2574	1.8838	0.982	0.5596
4-acetylphenyl sulfate				1.2636	3.3486	2.1222	0.3635	1.1614	0.5017	0.7118	1.032	0.978	1.1451	1.6048	1.8505	0.9694	0.4118	0.811	0.6961	1.4399	1.1852	1.022	1.8824	0.3723	0.1543	0.9607	2.6703	0.4481	2.2995	0.9427	2.0413	0.6241	0.6123
4-allylcatechol sulfate				0.2872	4.3261	1.2324	1.0066	0.9206	0.8189	0.3367	2.206	1.523	0.6835	2.2173	1.0888	0.9539	0.8488	1.1864	0.2747	1.2992	0.6637	1.7121	0.917	0.2279	0.1981	0.9934	2.268	0.7222	1.6256	2.6393	2.4877	0.7825	2.0962
4-allylphenol sulfate				0.5685	2.4158	0.9853	0.9004	0.9234	0.5685	0.602	1.2545	1.1353	0.6582	1.8451	1.0147	0.6322	1.0865	1.1121	0.5685	0.7795	0.5685	1.0751	0.5685	0.5685	0.5685	0.5847	1.4287	0.6814	0.6863	1.4291	1.6804	0.5911	1.0714
4-chlorobenzoic acid	74-11-3	C02370		0.946	1.1914	0.8922	1.0999	0.9881	0.9574	1.0577	0.9827	0.9649	1.1063	1.0952	0.867	0.9251	0.9279	0.9035	1.3962	1.1632	1.0119	1.1079	0.9532	1.0869	0.9653	0.8864	0.9512	0.9352	1.0603	1.0956	1.0755	1.0721	1.014
4-cholesten-3-one	601-57-0	C00599	HMDB0000921	1.8473	0.7585	1.4622	3.1849	2.4238	2.5266	1.9184	1.9222	2.6033	2.0682	2.493	2.2849	2.4526	4.0064	3.0803	0.7352	0.6855	0.8958	0.931	0.9271	0.9895	0.9889	0.8919	1.0105	0.931	0.7913	0.7046	0.9262	0.6107	0.7954
4-ethylcatechol sulfate				1.0286	2.1613	0.9239	1.3712	1.3154	0.6178	1.1488	1.861	0.886	0.8471	1.6585	0.437	0.3785	0.2856	0.7164	0.7248	1.9203	2.6674	0.9714	1.0566	0.7201	0.7216	1.1908	1.98	0.4424	1.7861	1.158	1.1297	0.6472	0.8888
4-ethylphenol glucuronide				0.8686	2.5883	1.055	0.1146	1.3255	0.0109	1	1.388	1.1643	0.4444	1.3329	0.0109	0.2826	0.2827	0.7856	0.6589	1.6331	1.6659	0.9907	0.8094	0.4738	1.0713	2.0832	1.6643	0.1489	0.9528	1.2518	1.0203	0.6962	2.2476
4-ethylphenyl sulfate	123-07-9	C13637	HMDB0062551	1.3817	2.4694	1.1496	0.2406	1.2742	0.0367	1.0373	1.3435	1.6398	0.9059	1.2496	0.0171	0.6797	0.3892	1.3818	0.6638	1.5425	1.8134	0.8651	0.6097	0.7246	0.9127	1.6893	1.3775	0.3349	0.7453	1.5199	0.9627	0.9443	1.55
4-guanidinobutanoate	463-003;463-00-3	C01035	HMDB0003464	2.096	1.1618	0.3917	0.4053	2.1339	0.7755	1.0062	0.7224	1.0707	1.9482	0.9938	0.5108	0.5378	0.9355	2.0341	0.4797	1.6558	0.7975	1.2352	0.8694	0.5516	0.3803	1.232	2.2249	1.1425	1.5933	0.5298	1.5603	0.9079	1.104
4-hydroxybutyrate (GHB)	502-85-2	C00989	HMDB0000710	0.2993	0.4169	0.8611	1.832	0.9221	2.1898	3.3854	0.2993	1.1701	0.5417	0.3518	0.2993	0.6447	1.5754	0.6633	1.2723	0.2993	1.0222	1.9193	1.8062	1.8338	0.8487	1.9541	1.2673	0.8616	0.87	1	0.2993	0.2993	0.723
4-hydroxycinnamate	501-98-4	C00811	HMDB0002035	1.5213	2.9123	1.5359	0.1282	1.1889	0.6578	0.4279	0.5467	1.618	1.2741	1.3253	1.5742	1.2421	0.7187	1.4458	0.791	0.9827	0.4664	1.1633	2.1197	0.2146	0.1259	0.441	2.1439	0.801	1.0173	0.2004	1.7997	0.4494	0.4518
4-hydroxycinnamate sulfate	376374-66-2			1.1839	2.3718	1.0138	0.2257	1.3754	1.353	0.2864	0.4496	2.0496	1.2613	1.3468	2.0831	1.2674	0.9135	1.6634	0.5384	1.1266	0.6212	0.5898	1.2519	0.2281	0.087	0.2893	1.9293	0.5358	1.9159	0.2926	0.9862	0.4408	0.5044
4-hydroxyhippurate	2482-25-9		HMDB0013678	1.0352	3.9473	1.4726	0.407	1.0327	0.6911	0.6812	0.5335	1.5424	0.8673	1.4051	1.1057	0.9355	0.7319	1.0498	0.7204	1.5469	0.6705	0.9673	1.9181	0.6416	0.5929	1.1387	1.4879	0.6521	1.1285	0.6048	1.4734	0.5082	1.2371
4-hydroxyphenylacetate	156-38-7	C00642	HMDB0000020	1.3001	1.4637	0.9225	1.1298	0.9495	0.6596	0.6072	0.8664	1.1294	0.8281	1.2388	1.0505	1.3603	0.9321	1.1255	0.4475	1.2579	0.811	1.3914	1.2964	0.6187	0.3912	0.7226	1.6633	0.8054	1.1119	0.492	1.1629	0.4859	1.1032
4-hydroxyphenylpyruvate	156-39-8	C01179	HMDB0000707	1.2945	1.0693	1.3195	0.3591	0.9051	0.8624	0.9481	0.7308	0.8537	1.2238	0.8178	0.9148	1.3904	2.1776	1.8446	0.6179	0.7622	1.1642	1.4426	1.4056	0.6198	0.4907	1.2189	2.3649	1.2108	1.6313	0.4705	1.0519	0.4213	0.9456
4-imidazoleacetate	645-65-8	C02835	HMDB0002024	1.0742	1.3842	0.7905	0.8449	0.8978	1.0002	0.7281	0.3292	1.3417	0.9129	0.8683	0.9998	1.0425	0.8397	1.2433	0.842	1.4467	0.9318	1.2005	1.158	0.5206	0.7744	0.9447	1.5549	1.074	1.023	1.0387	1.1061	0.9176	1.2591
4-methoxyphenol sulfate	3233-60-1			0.4731	1.1007	1.4311	1.0072	1.6351	0.1398	1	1.6369	0.0196	1.0901	1.6927	0.2174	0.0196	0.0196	0.0196	0.0196	1.4171	0.7977	0.6772	0.466	0.0196	0.0196	0.9283	1.6618	0.0196	1.5048	0.8393	1.8376	0.9344	0.1434
4-methyl-2-oxopentanoate	816-66-0	C00233	HMDB0000695	0.8192	1.2681	1.4033	0.8337	0.8545	1.2038	1.0085	1.208	0.9061	1.0456	1.0325	1.0133	0.8462	1.1832	0.9032	0.9643	0.8975	1.2234	1.2068	0.9265	0.9931	1.5462	0.9719	0.8796	0.9544	1.1567	1.0069	0.8952	1.0892	0.9335
4-methylcatechol sulfate			HMDB0240459	1.2911	2.9849	1.7166	1.3056	1.928	0.4649	1.0093	1.8406	1.141	0.681	1.5996	0.3956	0.4904	0.5643	0.7601	0.7141	1.861	1.9329	1.2077	0.8441	0.5215	0.5936	0.8473	2.0887	0.7191	0.9907	0.9225	1.7177	0.859	1.3621
4-methylhexanoylglycine				1.0139	2.6384	0.4474	0.9518	1.226	0.372	1.1426	0.6804	0.7574	1.4221	0.7583	0.2453	0.8146	0.473	0.6839	0.7681	1.6622	1.6638	0.9861	2.1125	1.527	1.3376	2.3923	1.902	0.815	3.3411	1.2885	0.6777	0.5448	1.5872
4-vinylcatechol sulfate				1.5665	1.6323	1.7603	0.2015	1.031	0.656	0.7814	0.5191	1.0036	1.1052	0.9964	1.486	1.4472	0.9057	1.9531	0.7666	1.2809	0.9308	1.2443	0.9317	0.2164	0.1474	0.6876	2.0619	1.3168	1.2741	0.2801	1.3342	0.7489	0.3765
4-vinylguaiacol glucuronide				1.6542	0.8517	3.2944	0.0818	1.6225	1	0.2274	0.2117	0.6037	1.4033	1.0299	3.1338	1.6408	0.7937	1.3566	2.0598	0.5212	0.4234	1.6407	1.2946	0.0962	0.0818	0.4635	1.9598	0.8017	2.1791	0.3481	1.6275	0.5409	0.2428
4-vinylguaiacol sulfate			HMDB0127980	1.8024	1.1042	2.9186	0.0155	1.0772	0.8523	0.3501	0.2757	0.6011	1.3078	1.2449	3.1131	2	0.5717	1.176	1.5944	0.8877	0.9228	1.9157	1.3854	0.194	0.0919	0.6242	2.8297	0.7029	3.461	0.28	1.2741	0.3441	0.2439
4-vinylphenol sulfate	2628-17-3	C05627	HMDB0062775	1.8064	1.6897	1.0899	0.3169	1.5354	0.8037	0.9991	0.9485	1.3971	1.6884	1.4067	1.1559	1.1256	1.0009	1.3644	0.847	0.9145	0.8419	0.9595	0.9068	0.5058	0.205	0.2005	1.5242	1.0293	1.1007	0.4599	1.398	0.6721	0.587
5,6-dihydrothymine	696-04-8	C00906	HMDB0000079	0.7741	1.6135	2.0101	0.5781	1.0299	1.1443	0.5284	0.6417	2.2314	1.2019	1.1282	1.5266	2.8827	3.2901	1.8244	0.8552	0.3382	1.0813	0.9057	0.4642	0.8932	0.7001	0.6965	0.9701	1.8149	0.8949	0.9375	0.7429	1.8201	1.4614
5,6-dihydrouracil	504-07-4	C00429	HMDB0000076	0.6771	2.1879	0.8653	0.4256	2.1107	0.4256	0.835	0.6246	0.9227	0.9107	1.3851	0.5038	0.4256	0.4256	0.7001	1	1.4957	2.1989	1.106	0.4784	1.2246	0.6539	1.7013	2.4762	1.4054	3.9422	1.0126	1.1663	0.6932	0.9363
5,6-dihydrouridine	5627-05-04		HMDB0000497	1.1154	1.0646	1.0372	1.1736	0.8577	0.9751	0.9362	1.04	1.4051	1.0856	1.0624	1.0791	1.2007	0.9708	0.8869	0.9436	0.9137	1.1006	0.7285	0.8187	1.0382	1.429	0.9315	1.0249	1.1367	0.9005	0.8314	0.8091	0.9709	0.8
5-(galactosylhydroxy)-L-lysine	32448-36-5			0.793	1.0944	0.4641	0.9625	1.1273	1.0701	0.8069	0.6629	0.9909	2.1685	1.07	0.4897	1.282	1.0102	0.4757	1.3705	0.5207	1.2984	0.9683	0.7632	0.6121	0.8286	0.8437	1.0606	1.0334	1.4921	1.0508	1.0091	0.9634	1.202
5-dodecenoate (12:1n7)	2430-94-6		HMDB0000529	0.5295	0.9555	0.414	2.0257	0.9772	1.7693	1.7769	1.0228	1.4833	0.7388	0.7721	0.6913	0.809	0.6003	0.2008	1.648	1.2007	1.6763	0.8626	0.9401	2.4116	2.5748	2.5444	0.6243	0.7466	1.5937	1.4039	0.6672	1.0842	1.2592
5-dodecenoylcarnitine (C12:1)			HMDB13326	1.0899	0.9149	1.6379	2.4951	1.3838	1.7775	3.0325	1.1975	2.5894	1.0536	0.9464	0.9248	1.0773	3.4529	0.9424	0.8086	0.7087	0.6553	0.254	0.7309	1.7227	1.3762	1.2046	0.3777	0.7405	0.5764	0.6	0.3592	0.8321	1.67
5-hydroxyhexanoate	44843-89-2		HMDB0000525,HMDB0000409	0.9481	1.6043	0.5088	0.9276	0.8899	0.896	1.7745	0.6106	0.6242	0.8146	0.7178	0.5088	0.5088	0.5604	0.7524	2.8292	1.6905	1.7311	1.1192	0.9299	1.582	1.5161	2.6544	1.4574	1.0519	2.4654	1.5843	0.7463	0.726	1.1833
5-hydroxyindoleacetate	54-16-0	C05635	HMDB0000763	0.9935	0.936	1.1177	1.0065	1.2803	1.7839	1.9952	1.7625	2.34	1.4092	1.116	1.8208	1.3635	0.922	0.8484	0.7634	0.7818	1.2006	0.4933	0.556	0.8108	0.9408	0.4933	1.4749	0.5816	1.4137	0.679	0.4933	0.7041	0.7654
5-hydroxylysine	13204-98-3	C16741	HMDB0000450	1.1022	0.7574	1.0495	0.9085	0.9842	0.8581	1.0158	0.8584	0.9162	1.193	1.0953	0.9623	1.0793	1.0732	1.2593	1.0187	0.9271	1.0173	1.1461	0.9765	0.9288	0.9153	1.1101	1.3444	0.9717	1.0194	0.7938	1.0325	0.835	0.764
5-methyl-2'-deoxycytidine	838-07-3	C03592	HMDB0002224	1.1309	0.5342	0.9914	0.2936	0.2936	0.824	0.2936	0.7534	1.0086	0.7641	1.1313	1.3776	1.2853	1.2492	1.3776	1.0241	0.2936	0.9507	1.0986	0.7195	0.4291	1.115	0.8287	0.7732	1.3513	0.6905	0.7712	0.2936	1.045	1.1301
5-methylcytidine	2140-61-6		HMDB0000982	0.753	1.1139	0.9548	1.1341	0.9794	0.8777	1.1306	1.2021	1.0206	0.9235	0.9352	0.8637	1.0596	0.7865	0.878	1.1948	0.7462	0.9207	0.8993	1.0248	1.1228	1.5285	1.3851	0.9479	1.2718	0.5663	1.284	0.9167	1.1735	1.1876
5-methylthioadenosine (MTA)	2457-80-9	C00170	HMDB0001173	1.1078	1.097	0.8317	1.4381	1.1907	1.1145	0.909	0.7622	0.9607	2.0672	0.8747	0.6977	1.1112	0.7435	0.9136	1.1807	0.7908	1.1271	1.0393	1.2437	0.9136	0.6782	0.8877	1.8544	1.0807	1.2794	0.923	1.124	0.8624	0.86
5-methylthioribose	23656-67-9		HMDB0001087	0.7411	1.0563	0.9917	1.064	0.8254	1.2326	1.2456	1.0917	1.1972	0.8699	0.9063	0.9464	1.2493	1.1253	0.8421	1.1202	0.8579	1.4064	0.8597	0.7525	1.1402	1.048	1.0076	0.9789	1.0745	0.9179	0.9924	0.9889	0.8147	1.032
5-methyluridine (ribothymidine)	1463-10-1		HMDB0000884	0.6857	1.0149	0.8009	1.4432	1.279	1.9764	0.8121	1.1474	1.0592	0.9851	0.7027	1.3243	1.0613	0.6673	0.7206	1.0855	0.7227	0.9807	0.8611	0.8822	1.3054	1.3414	1.286	1.5372	0.721	1.1933	1.4638	0.586	0.6598	0.8105
5-oxoproline	98-79-3	C01879,C02237	HMDB0000267	0.9511	1.2234	1.1753	0.9725	1.2333	0.8829	1.0022	0.9006	0.9844	1.3482	0.8199	0.662	1.0574	1.0404	1.0565	1.2914	1.0321	0.8557	1.1469	1.0369	0.9718	0.6575	0.71	1.1688	0.8563	1.159	0.8116	1.1494	0.9978	0.8847
6-hydroxyindole sulfate			HMDB0000682	1.0267	1.0452	1.3528	1.9191	0.9678	2.0787	1.6254	1.3583	1.7439	0.9897	1.1659	0.5718	1.284	0.9244	1.0695	0.5245	0.8872	1.1639	0.9621	0.827	1.2302	0.5059	1.0103	1.1103	0.5574	0.9113	0.3148	0.961	0.5515	0.6759
6-oxopiperidine-2-carboxylate	34622-39-4		HMDB0061705	1.4531	1.0518	0.9146	0.3827	1.0014	1.6891	0.3962	0.5595	0.9986	0.8135	1.0607	2.7603	2.1348	0.6629	1.5488	1.0393	0.8027	0.8074	1.6912	1.3515	0.4054	0.3658	1.269	1.8426	0.9593	2.3203	0.3353	1.292	0.637	0.5551
7-HOCA	115538-85-7	C17337	HMDB0012458	2.2867	1.0856	2.584	0.9332	1.8362	0.74	2.6528	1.9051	1.8103	1.3973	1.5688	0.9348	1.018	0.6798	1.1225	0.9304	0.8301	1.0002	0.9998	0.8008	0.8242	0.5288	1.3539	1.1764	0.7206	0.9146	0.5444	1.0792	0.8189	0.7754
7-ketodeoxycholate	911-40-0		HMDB0000391	0.2821	2.2586	0.6255	4.7482	1.3006	2.1541	1.8933	0.5849	3.425	0.155	0.0921	1.2565	0.6508	33.3233	1.9729	0.7435	1.8885	0.3594	0.0947	5.779	18.345	2.5641	0.6516	0.0922	0.1324	0.5911	1.8784	0.0299	0.3926	21.3605
7-methylguanine	578-76-7	C02242	HMDB0000897	1.0888	1.0001	1.155	1.1824	0.9121	1.058	1.0728	1.1173	1.3684	1.1307	1.0381	0.9406	1.2095	1.0123	1.0395	0.8824	0.8709	1.1939	0.6208	0.7284	0.9518	1.0502	0.9685	0.9999	0.9578	0.8868	0.9732	0.808	0.9622	0.9592
9,10-DiHOME	263399-34-4	C14828	HMDB0004704	1.0603	1.2172	0.5431	1.7719	1.1401	1.4619	2.1607	1.0177	1.2971	1.1955	0.7186	0.4752	0.6205	0.7494	0.3656	0.7788	1.1059	1.4705	0.8916	0.5317	1.6307	1.6818	1.2321	0.6848	0.9334	0.9196	1.3041	0.9806	0.7113	0.9823
acetylcarnitine (C2)	5080-50-2	C02571	HMDB0000201	0.8207	1.0127	0.8311	1.2443	1.0177	0.9907	1.1888	1.0329	0.8601	1.196	0.8725	0.6485	0.8765	0.7728	0.8186	1.0803	0.9943	1.068	0.9562	1.2584	1.0429	1.0057	1.0896	1.1936	0.8209	1.3107	0.9488	0.8398	0.7328	1.1545
acetylphosphate	94249-01-1	C00227	HMDB0001494	0.4853	1.8739	0.5259	1.4589	1.0955	1.7256	0.8853	0.6515	0.646	1.8642	0.5222	0.5907	1.6918	0.4708	0.9539	1.6704	1.0206	0.9872	1.3088	0.9992	1.0154	0.7181	0.4927	0.9304	1.0008	0.8887	1.3243	1.4037	1.0344	1.1258
aconitate [cis or trans]		C02341,C004174	HMDB0000958,HMDB000072	0.9158	1.2565	1.053	1.0582	0.9941	1.1	1.0737	0.9056	0.9621	1.1931	1.0388	0.9832	1.1356	0.9891	0.9067	1.1226	0.8485	1.1995	0.8882	0.8559	0.8726	1.0002	1.0369	1.338	1.1113	1.2313	0.9998	0.9416	0.9014	0.9807
adenine	73-24-5	C00147	HMDB0000034	0.9233	1.4417	0.3179	0.6367	1.3937	0.8969	1.0767	0.7117	1.1163	0.7359	0.6015	0.3824	0.571	0.2533	0.8599	1.6292	1.2085	1.9909	2.268	1.8644	1.6632	0.7159	1.5464	3.153	0.6873	3.1164	0.7713	1.0787	0.4286	1.4777
adenosine	58-61-7	C00212	HMDB0000050	0.1926	1.1516	0.0294	0.2221	0.9698	0.7313	0.0704	0.2492	0.0419	0.5148	1.2631	0.9193	0.0491	0.0308	1.8627	0.9482	2.5933	1.4491	2.8058	1.3353	2.2554	3.4092	1.4687	1.184	1.0302	0.8118	1.1081	1.8633	0.8393	1.266
AMP	149022-20-8	C00020	HMDB0000045	0.0163	5.0296	0.0148	0.1079	0.5076	0.3061	0.0185	0.017	0.0086	1.6366	0.4943	0.0134	0.0137	0.0149	0.3822	3.2857	3.258	4.3347	4.2475	4.3115	2.7348	3.4098	1.1503	4.06	0.5621	5.1541	5.0792	3.1117	0.8497	3.6151
adipoylcarnitine (C6-DC)			HMDB0061677	0.9614	0.9814	0.6686	1.6005	0.9369	2.2289	1.5582	1.3406	0.7509	0.9425	0.8877	1.3581	1.5124	0.766	0.7399	0.7525	1.0471	1.0959	0.8719	1.0258	1.1991	0.8755	1.4156	1.1684	0.5177	1.3085	1.0186	0.3967	0.4339	1.1546
adrenate (22:4n6)	2091-25-0	C16527	HMDB0002226	0.9344	1.3053	0.9802	1.8061	1.0911	1.1866	1.462	1.2492	1.2642	1.468	0.8055	0.4017	1.142	1.3706	0.6063	1.0198	0.562	0.7544	0.7219	0.8056	1.4782	0.9675	1.1181	0.6515	1.044	0.4156	0.4894	0.623	1.1507	0.8003
adrenoylcarnitine (C22:4)*				0.7397	0.8168	0.6682	1.4155	1.3634	0.6682	1.2947	0.6682	1.2181	0.8408	1.0743	0.6682	0.6682	1.2958	0.6682	1.0366	0.6721	0.6682	0.6682	0.6682	1.0839	0.9549	0.9634	0.8241	0.686	0.6682	0.6682	0.6682	0.6682	1.2655
alanine	56-41-7	C00041	HMDB0000161	1.0314	0.789	1.0654	0.9427	1.254	1.3877	0.9014	0.7944	0.9345	1.3031	0.9824	1.3777	1.205	1.0498	1.3412	1.109	0.9412	1.3929	1.0056	0.8967	1.0095	0.6941	0.8744	1.4014	0.9679	1.453	0.9944	0.9337	0.8503	0.8041
allantoic acid	99-16-1	C00499	HMDB0001209	1.4718	1.1419	1.4083	1.0056	1.0739	0.9258	1.1409	1.385	1.3056	0.8514	1.038	1.5859	1.211	0.9944	0.9252	0.703	0.9144	1.2147	0.9312	0.8559	1.0194	1.1477	0.8065	0.7657	1.0302	0.8556	0.9387	0.8224	0.6516	0.9872
allantoin	97-59-6	C02350,C02348,C01551	HMDB0000462	1.1364	1.1558	1.1137	0.9266	0.8848	1.006	0.8622	0.9124	1.1199	0.9736	0.9106	1.3112	1.2521	1.0042	0.9805	0.9969	0.9371	1.2231	0.9225	0.9732	0.8887	1.1713	1.0031	1.0543	1.0248	1.209	0.9054	0.9387	0.7705	1.0376
alpha-hydroxyisocaproate	10303-64-7	C03264	HMDB0000665,HMDB0000624,HMDB00746	0.2486	1.2525	0.5582	0.2687	0.4714	0.2518	0.7401	0.213	0.358	0.614	0.3566	0.3081	0.4839	0.4424	1.0408	1.1985	1.0336	1.5569	1.1639	1.1361	1.3002	1.3983	1.2925	0.9955	1.7923	1.461	1.0045	1.0808	0.9511	1.1399
alpha-hydroxyisovalerate	600-37-3		HMDB0000407	0.2006	1.6588	0.3024	0.2878	0.3001	0.3982	0.2652	0.254	0.3608	0.3345	0.3466	0.4152	0.4025	0.4691	0.6273	1.4934	1.1943	1.5294	1.5796	1.1406	1.6043	1.3754	1.3533	1.1138	1.6549	1.2456	0.9262	1.1902	1.0738	1.0755
alpha-ketoglutaramate*	18465-19-5	C00940	HMDB0001552	1.456	1.1792	1.2087	0.818	1.1248	0.9612	0.8505	0.7746	1.0446	1.2656	0.906	0.9192	1.0362	1.043	1.1286	1.5217	1.0131	1.1028	1.2653	0.9869	0.9052	0.7768	0.9499	1.1067	0.7916	1.0899	0.6669	0.8756	0.6562	0.9201
alpha-ketoglutarate	305-72-6;328-50-7;22202-68-2	C00026	HMDB0000208	0.9149	1.1831	0.5767	0.3152	0.6167	0.8789	0.924	0.6092	0.6436	0.4141	1.2362	1.193	0.7013	1.2448	0.8213	1.0875	1.7154	2.3624	1.4646	1.3123	1.0902	0.9823	2.1382	0.9848	1.2099	1.9413	0.8678	1.0152	0.7631	1.162
alpha-muricholate	2393-58-0	C17647	HMDB0000506	1.2503	1.2346	0.9244	4.9286	0.8399	2.5721	3.208	0.8373	17.011	0.473	0.3078	2.2296	0.8752	74.0633	1.0756	0.9059	1.9679	0.4086	0.0824	15.872	16.849	1.8029	0.421	0.1032	0.2655	0.7868	1.1472	0.023	0.3174	47.3427
alpha-tocopherol	59-02-9;10191-41-0	C02477	HMDB0001893	0.2618	0.2342	1.6235	0.3788	0.129	0.7505	0.3681	0.7988	1.5555	0.0412	0.2521	0.514	0.7811	1.2012	1.5693	0.1281	1.6568	2.3039	1.3047	0.3742	1.7021	1.203	1.8252	2.0759	1.3121	1.9699	1.5992	0.1513	0.0135	1.7342
anserine	10030-52-1	C01262	HMDB0000194	0.4802	3.4866	0.4314	2.68	1.0693	0.7209	0.8313	0.5256	0.9107	4.2872	0.9037	0.2912	2.4067	0.4815	0.9307	1.1655	0.7356	1.266	0.5934	1.2857	0.8428	0.6728	0.7475	1.8912	1.6877	2.0731	1.3506	1.8004	1.6947	1.6678
anthranilate	118-92-3	C00108	HMDB0001123	0.593	1.0279	0.7903	1.5972	1.315	1.0595	0.7893	0.8508	0.8328	1.1183	1.0778	0.8754	0.7951	0.4618	0.625	0.8117	1.0951	1.0025	1.2966	1.6615	1.1756	0.8037	1.712	1.4174	0.7323	1.7019	0.9975	1.0559	0.507	0.7714
arabitol/xylitol		C00542,C01904,C00379	HMDB0002917,HMDB0001851,HMDB0000568	1.4089	1.0875	0.8058	0.6873	1.3141	0.8548	1.0184	0.6956	1.0599	1.5276	0.7542	0.7078	0.767	0.66	1.1544	0.9491	1.234	1.356	1.5319	1.2896	0.9212	0.7366	1.1852	2.1176	0.9037	2.105	0.8196	0.9816	0.5805	1.0252
arabonate/xylonate		C00502,C05411	HMDB0000539	1.6141	1.2695	1.296	0.8549	1.1976	0.9883	1.1757	1.4351	1.1334	1.4783	0.8585	0.8773	0.9455	1.1225	1.1879	0.8487	0.9263	0.932	1.2608	1.0589	0.8493	0.9828	0.9965	1.1941	0.591	1.042	0.5694	0.9323	0.5873	1.0035
arachidate (20:0)	506-30-9	C06425	HMDB0002212	0.6657	1.4432	0.9252	0.9624	0.8721	1.102	1.2566	0.8213	1.0527	0.9368	0.7608	0.7573	0.7146	0.9418	0.8496	1.3708	1.2313	1.108	1.1982	1.1165	1.5836	1.4487	1.6627	0.8944	0.9675	0.9568	1.0325	0.9499	1.0595	1.3678
arachidonate (20:4n6)	506-32-1	C00219	HMDB0001043	1.0513	0.9921	1.254	1.8466	1.0179	1.2254	1.2261	1.2082	1.5513	1.8499	0.9688	0.4896	1.1916	1.4553	0.6501	0.767	0.7274	0.705	0.778	1.4074	2.5117	1.3057	1.0079	0.9313	0.9448	0.7019	0.5648	0.7495	0.8376	0.8516
arachidonoylcarnitine (C20:4)			HMDB0006455	0.7605	0.8881	0.9821	2.2009	1.4474	1.2944	2.0816	1.2299	1.8145	1.1788	1.146	0.9801	0.9613	1.7446	0.6762	1.2447	0.7525	0.9036	0.5442	1.0179	1.6401	1.58	1.1284	0.7957	0.8676	0.877	0.7482	0.5872	0.6628	1.2682
arachidoylcarnitine (C20)*			HMDB0006460	0.5509	1.0295	0.5509	1.1605	0.8382	0.5509	0.9834	0.5509	0.5509	0.5509	0.9368	0.6965	0.5509	0.6885	0.8041	0.9059	1.2806	1.3521	0.9669	1.0835	1.5893	1.3765	0.5509	1	0.5509	1.1075	1.209	0.8365	0.5509	1.3982
argininate*	157-07-3		HMDB0003148	1.3377	1.4192	0.6425	0.6934	1.2331	0.6397	0.9056	0.9626	1.0374	1.3977	1.086	0.3564	0.6656	0.6567	0.8743	0.475	1.2456	1.042	1.0559	1.2894	0.7061	0.5376	1.1849	1.8262	0.6727	1.8476	0.4986	1.0586	0.5443	1.288
arginine	1119-34-2	C00062	HMDB0000517	0.7451	0.7306	0.9858	0.7153	1.2348	0.8063	1.0142	0.7874	1.2112	1.1142	1.2885	1.5967	0.4541	1.3501	1.2494	0.7982	1.0275	1.1841	0.8221	0.3416	1.1149	1.1926	0.5382	0.5585	1.1812	0.8649	1.3067	0.8711	1.0239	0.7545
argininosuccinate	156637-58-0	C03406	HMDB0000052	0.8322	1.2776	0.7582	0.829	1.3022	2.482	0.8131	0.6106	1.0091	1.7009	0.7073	1.232	1.0457	0.9606	1.1337	1.686	0.6897	1.6294	0.9909	0.8035	1.1283	0.8623	0.7766	1.6254	0.6952	2.504	1.1837	1.2924	0.7189	0.7756
ascorbic acid 2-sulfate			HMDB0060649	1.8841	0.9865	1.4784	1.2457	0.9768	1.1121	1.1383	1.0135	1.4255	1.1969	0.941	1.4305	1.9021	1.0917	0.9846	0.8969	0.8426	1.0862	0.7486	0.7047	0.9537	1.3421	1.1419	0.9335	1.087	0.8701	0.9853	0.7028	0.7559	0.93
ascorbic acid 3-sulfate*				2.1341	0.6986	1.6673	1.4824	1.5837	1.7393	1.4357	1.2577	1.7558	1.6021	1.1346	1.4732	1.6983	1.118	1.3584	0.5515	0.8016	0.9649	0.6314	0.6312	0.923	0.902	0.973	0.9867	0.9084	0.8792	1.0133	0.6544	0.5281	0.9856
asparagine	70-47-3	C00152	HMDB0000168	0.9562	0.7805	0.9149	0.8658	1.053	1.1965	1.0828	0.8145	1.0268	1.1816	1.0339	1.3243	0.9966	1.006	1.2445	1.0034	0.8953	1.2202	1.0932	0.8354	0.9823	0.6989	0.7862	1.0622	0.9007	1.1082	0.7688	1.019	0.8023	0.7491
aspartate	56-84-8	C00049	HMDB0000191	0.8701	1.0399	0.9394	2.4663	1.5164	1.8116	1.0278	0.8957	1.4665	1.6786	1.2581	0.6408	1.1579	1.5249	0.9502	1.9827	0.7634	0.8511	0.7953	0.6717	1.3874	0.8364	1.0665	0.8164	1.0414	0.8206	1.446	0.8511	0.9722	0.834
azelate (C9-DC)	123-99-9	C08261	HMDB0000784	0.9864	1.3039	0.6681	0.5692	1.7231	0.7714	1.1554	0.586	0.8977	1.4829	1.0733	0.9603	0.6515	0.6943	1.0017	0.8972	1.3526	1.207	0.9983	1.4052	1.4131	1.0357	1.8108	1.2421	0.6811	2.8543	0.8263	1.1397	0.5563	0.9373
behenoyl dihydrosphingomyelin (d18:0/22:0)*			HMDB0012091	0.6728	1.2356	0.8447	2.335	0.8039	1.0006	0.6924	0.4517	0.7836	0.8137	0.5212	0.9994	0.5792	1.018	0.7475	1.0687	1.2198	1.2249	1.0706	1.5136	1.185	2.1071	1.6234	1.1262	0.9336	1.0731	0.8575	0.9705	0.8584	2.0141
behenoyl sphingomyelin (d18:1/22:0)*			HMDB0012103	0.5831	1.5331	0.6022	0.739	0.5951	0.592	0.5588	0.4112	0.5964	0.5706	0.4719	0.6722	0.5211	0.574	0.5625	1.4925	1.7829	1.5589	1.3785	1.7541	1.2688	1.9632	1.8363	1.2473	1.1608	1.4265	1.0147	1.1308	0.9853	1.9935
behenoylcarnitine (C22)*			HMDB0062468	0.6868	1.3392	0.7184	0.9776	0.8745	0.8452	0.8683	0.5345	0.6403	0.9258	0.8317	0.9308	0.6874	0.8196	0.9478	1.364	1.6872	1.4788	1.2577	1.6842	1.3874	1.9768	1.7068	1.2478	1.0224	1.2259	1.2084	1.1753	0.9251	1.7717
benzoate	65-85-0	C00180	HMDB0001870	0.6292	0.4263	0.4263	1.2164	1.1515	5.9115	0.7831	0.6393	0.6957	1.991	2.4517	0.4263	0.4263	0.4263	0.4263	5.2019	0.7212	1.1658	0.9821	0.5409	1.0179	1.1326	0.7447	1.154	0.4263	1.2611	2.9922	0.7366	0.4888	0.4726
beta-alanine	56-41-7;107-95-9	C00099	HMDB0000056	0.9039	1.2593	0.7804	1.3763	1.0054	0.9324	0.9523	0.5365	0.9006	1.7358	0.9457	0.7412	0.9962	0.9321	1.0038	1.3049	0.9059	1.1794	0.908	1.1722	1.0168	0.7862	0.9127	1.4158	0.9924	1.5226	1.0407	1.2311	1.1896	1.1582
beta-hydroxyisovalerate	625-08-1		HMDB0000754	0.816	1.5258	0.7236	1.0544	0.808	0.8111	0.8786	0.8089	0.8516	0.7428	0.8097	1.0237	1.0834	0.7867	0.99	1.1841	0.8426	1.2448	1.2637	1.3488	1.2847	1.5872	1.5854	1.3197	2.7573	1.01	0.9381	0.845	0.5983	1.0991
beta-hydroxyisovaleroylcarnitine	99159-87-2			0.9135	1.0706	1.0108	1.3074	1.0894	0.9458	1.0742	0.9233	1.0883	1.2424	0.8309	0.7423	0.8957	0.96	0.9739	1.1491	0.7906	0.9409	1.1812	1.2684	1.0439	0.9312	1.0473	1.149	0.9024	1.5142	0.9892	0.9076	0.9557	1.1228
beta-muricholate	2393-59-1	C17726	HMDB0000415	1.0016	0.9984	0.8828	5.2717	1.1144	2.7501	2.2961	1.1685	2.9719	0.5829	0.4858	2.3421	1.4481	12.1289	1.1772	0.5707	0.6488	0.288	0.22	2.1867	3.2574	0.6317	0.9008	0.1528	0.2257	0.486	1.0723	0.1019	0.3027	9.2321
beta-sitosterol	83-46-5	C01753	HMDB0000852	0.2872	1.2736	0.6978	0.6667	0.5538	0.6022	0.2872	0.4721	0.9924	0.5233	0.4224	0.5518	0.2872	1.0845	0.5348	1.2078	1.4206	1.2524	1.0076	1.4175	1.3991	1.5272	2.2486	1.1699	0.748	1.1253	1.4508	0.5724	0.5475	1.5159
betaine	107-43-7	C00719	HMDB0000043	0.6924	0.9422	0.7735	0.8072	1.0223	1.0311	0.7752	0.8483	0.803	1.2363	0.9704	0.8753	0.7142	0.8611	0.9992	1.0008	1.0282	1.2845	1.5604	1.2342	1.327	0.9739	0.7574	2.0023	1.0654	1.5676	1.2606	1.4287	1.1189	0.7903
betonicine	515-25-3	C08269	HMDB0029412	1.673	0.9922	1.0078	1.06	1.5258	0.6465	1.2729	0.7731	0.5309	1.6303	1.6406	0.4257	0.7069	0.8244	3.6802	0.8341	0.7153	1.6	1.2102	0.7379	0.845	0.4257	0.8163	1.7527	0.4257	1.1309	0.8739	1.7718	0.9687	1.3711
bilirubin	635-65-4	C00486	HMDB0000054	0.0309	0.0312	2.6552	0.0542	0.0309	0.427	0.0719	0.1673	2.5327	0.0309	0.0309	0.0745	0.3	1.243	1.1219	0.0309	0.8988	1.7383	1.1012	0.0942	3.9467	1.2958	3.1568	1.5616	0.8101	2.0158	0.2861	0.0309	0.0309	1.2226
bilirubin degradation product, C17H18N2O4 (1)				1.3651	1.1945	1.0767	1.1358	0.9905	1.4681	1.8359	1.2202	1.2445	1.3306	0.7456	1.8257	1.2173	1.0045	0.5364	1.2246	0.9712	0.6194	0.6831	0.9854	1.1923	1.6868	0.5141	0.2334	0.9229	0.429	0.6445	0.8212	0.9955	0.5811
bilirubin degradation product, C17H18N2O4 (2)				1.4693	0.9895	1.2685	1.045	0.659	1.0744	1.6591	1.3984	1.5194	1.1131	0.9688	1.1041	1.2123	1.0762	0.3744	1.0105	0.5123	0.5716	0.7198	0.8094	1.077	1.3712	0.7419	0.3231	1.0675	0.2331	0.9346	0.9077	0.8779	0.5207
bilirubin degradation product, C17H18N2O4 (3)				1.2432	1.0068	1.0329	1.3461	1.1122	1.5966	2.1527	1.284	1.8973	0.7743	0.8396	1.3995	0.8935	1.5254	0.5453	0.8849	0.9915	0.4856	0.5942	1.085	1.6666	2.4331	0.6086	0.2944	1.0346	0.4052	0.7376	0.8306	0.8155	0.9932
bilirubin degradation product, C17H20N2O5 (1)				0.972	0.9548	0.9183	1.6964	1.2204	1.3971	3.0415	1.8676	1.5635	0.5589	1.1359	1.6563	0.928	1.5578	0.4776	0.8086	0.8655	0.199	0.4168	1.0778	1.9395	2.3334	0.3265	0.199	0.8063	0.199	0.8531	1.0725	1.0174	0.9826
bilirubin degradation product, C17H20N2O5 (2)				1.1828	0.9454	0.9673	1.8031	1.2543	1.6945	3.2032	2.0669	2.2986	0.8705	0.9924	1.8082	0.921	1.7974	0.5658	0.8195	1.005	0.2088	0.3961	1.1485	2.2378	2.5203	0.3272	0.123	0.7606	0.123	0.8764	1	1.0767	0.8639
biliverdin	55482-27-4;55482-27-4	C00500	HMDB0001008	1.2374	1.0034	0.681	1.3884	1.0839	1.6425	1.7933	0.9966	1.0549	0.9382	0.8735	1.687	1.0349	1.1031	0.5843	1.0312	0.8777	0.774	0.8517	1.3848	0.7761	1.5143	0.3222	0.9861	0.7889	1.2377	0.5123	0.8195	0.6381	1.1346
biopterin	22150-76-1	C06313	HMDB0000468	1.0309	1.3211	0.944	0.9814	0.9633	0.9541	1.2075	1.1563	1.0138	1.102	0.9862	0.7876	1.1718	1.062	0.8145	0.8952	1.1255	1.0587	0.8436	0.9005	0.9804	1.3223	1.357	0.885	1.1177	0.8837	1.078	0.9717	0.8607	1.3901
branched chain 14:0 dicarboxylic acid				0.1605	3.0256	0.2483	0.4117	0.3336	0.1605	0.4514	0.1605	0.1605	0.1605	0.2901	0.1874	0.1605	0.1605	0.2586	3.3721	2.114	1.4804	0.9712	1.0288	3.0706	2.5239	4.8354	1.3592	0.6219	2.4386	2.1809	0.7398	0.7776	1.9387
branched-chain, straight-chain, or cyclopropyl 10:1 fatty acid (1)*				0.4501	1.1118	0.4501	0.801	0.9913	0.9993	0.7795	0.4506	1.4638	0.4501	0.8598	0.6054	0.4501	1.1752	0.4501	0.4501	2.4188	1.4781	1	0.4501	0.4501	0.4501	1.7422	1.3309	0.4501	4.2398	0.4501	0.4501	0.4501	0.4501
branched-chain, straight-chain, or cyclopropyl 10:1 fatty acid (2)*				1.1426	0.9918	1.1071	1.9467	1.9565	2.8015	1.7983	1.7789	1.8208	0.973	1.9602	2.3836	1.5314	1.5493	1.057	0.2123	0.4526	0.7744	0.3029	0.432	0.8401	0.5172	1	0.7023	0.4666	0.766	1.0004	0.2123	0.2275	0.6501
branched-chain, straight-chain, or cyclopropyl 12:1 fatty acid*				1.025	0.6063	1.4862	3.0161	1.695	2.38	2.6569	1.9126	3.1207	0.9724	1.4006	1.3713	1.7931	2.5998	0.975	0.9241	0.5599	0.7075	0.4655	0.4002	2.2425	1.8612	1.1999	0.5022	0.5504	0.6237	0.8503	0.3551	0.6932	0.8451
butyrate/isobutyrate (4:0)	109-92-6	C00246	HMDB0000039	0.6687	0.9691	1.0797	2.0231	1.3981	1.309	1.809	1.5121	1.2163	1.2472	2.3	1.8221	1.8645	1.6468	1.7209	2.0492	0.5268	0.6701	0.867	0.8782	0.8111	0.9461	0.9317	0.7391	0.4714	1.0309	0.6939	0.4448	0.5152	0.5296
butyrylcarnitine (C4)	25576-40-3	C02862	HMDB0002013	2.2587	0.8356	0.8528	1.0803	1.22	0.5591	1.6825	0.7	1.0477	1.2954	1.2879	0.2494	0.9546	1.3652	1.4076	0.5775	0.6967	0.6799	0.9712	1.2332	0.6975	0.5541	1.5203	1.3245	1.0056	1.63	0.674	0.7034	1.0199	0.9944
butyrylglycine (C4)	20208-73-5		HMDB0000808	1.5533	1.2014	0.9668	1.6963	1.0773	0.306	1.4571	0.7204	0.9338	1.3382	1.6491	0.1939	0.6741	0.7682	1.0332	0.2939	1.0642	0.7718	1.4377	1.3854	0.7788	0.9602	3.1066	1.409	0.9038	2.5684	0.9009	0.6484	0.9222	1.3898
C-glycosyltryptophan	180509-18-6		HMDB0240296	0.7396	1.2168	0.7167	0.9158	1.0347	0.726	0.8422	0.9423	1.0254	1.7348	1.0112	0.3827	1.0584	0.7608	0.7413	1.2624	0.7594	1.061	0.8063	0.9888	1.0669	1.0228	1.0116	1.0737	0.977	1.2114	1.1888	0.7656	0.7048	1.1673
caffeic acid sulfate			HMDB0041708	2.1266	0.8346	1.2328	0.1952	1.4277	0.9874	0.4207	0.415	0.8781	1.7348	1.1308	1.3532	0.9122	1.0688	2.1387	0.4061	1.1433	0.9608	1.0553	1.0126	0.1973	0.2873	0.3871	1.6709	1.3171	1.5586	0.2675	1.1754	0.5639	0.8234
campesterol	474-62-4	C01789	HMDB0002869	0.5348	1.0751	0.9734	0.9558	0.9002	0.7205	0.7034	0.6487	1.0423	0.9093	0.8185	0.6345	0.6031	0.9183	0.7242	1.0522	1.2911	1.6106	0.9574	1.0266	1.4206	1.6062	1.839	1.2478	1.2084	1.1741	1.254	1.042	0.8601	1.2443
caprate (10:0)	334-48-5	C01571	HMDB0000511	0.6371	1.0137	0.6391	1.243	0.9882	1.9447	1.3987	1.0551	1.4179	0.8645	0.6885	1.019	0.798	1.1615	0.6365	1.3561	1.3167	0.8793	0.9826	0.9103	1.0103	1.5493	1.4432	0.8096	0.997	1.7007	1.003	0.6559	0.9906	0.7046
caproate (6:0)	142-62-1	C01585	HMDB0000535	0.9665	1.1045	0.7925	1.0601	1.1031	1.176	2.3507	1.6842	1.3874	0.8525	1.0356	0.6887	0.6864	0.9941	0.7142	1.3699	1.0059	0.6824	0.958	0.7623	0.9226	1.4351	1.2811	1.0843	0.838	0.9149	0.8408	0.6897	1.029	1.1723
caprylate (8:0)	124-07-2	C06423	HMDB0000482	0.8938	1.0879	0.5304	1.4539	1.1098	1.2334	2.5211	1.2326	1.3197	0.902	0.7155	0.5435	0.6508	0.9033	0.7884	1.3547	0.9121	0.7554	0.7046	0.7147	1.1642	1.2713	1.4454	1.3774	0.6002	1.3363	1.1484	0.6684	0.6906	1.1057
carboxyethyl-GABA	4386-03-02		HMDB0002201	1.146	1.0921	0.8052	0.9028	0.979	0.9667	0.8135	0.5206	0.9531	1.1741	0.9135	0.9584	1.0328	0.6662	1.0602	1.0131	1.2546	1.1586	0.9987	1.0958	1.2484	0.8495	1.4494	1.558	0.7643	1.584	1.3134	1.0013	0.571	0.8727
carnitine	461-05-2	C00487,C00308	HMDB0000062	1.1686	0.7739	1.2606	0.92	0.8546	0.989	1.0913	1.0824	0.9583	1.0958	1.069	0.8239	1.1329	1.1103	1.1031	1.0752	0.8714	0.7386	0.9956	1.1737	1.0738	0.5788	0.8876	0.8776	0.9563	0.8407	1.0044	0.9333	1.0651	1.0599
carnosine	305-84-0	C00386	HMDB0000033	0.8821	2.8913	1.0562	1.7616	0.9438	0.7973	0.9345	0.6269	1.1299	2.7915	0.7646	0.43	1.7502	0.585	0.8503	1.1259	0.6272	1.2759	0.5217	0.9002	0.7607	0.6951	0.7586	1.4387	1.4284	1.4594	1.2707	1.4902	1.318	1.409
carotene diol (1)				1.2534	0.9273	1.3127	0.5074	0.8434	0.4403	1.2972	0.7559	0.782	1.1612	1.2456	1.1809	1.2871	1.5224	1.5037	0.4558	1.1335	0.9877	1.029	0.456	1.2521	0.9944	0.8339	0.4007	1.1307	0.6994	0.9812	1.191	0.5513	1.0056
carotene diol (2)				1.0443	0.4608	1.9141	0.3497	0.8884	0.4032	0.837	0.7424	0.76	0.6499	1.1372	0.9944	1.4603	1.8276	2.2098	0.2317	1.0958	1.3199	1.178	0.2654	1.6396	1.0719	1.3855	0.3081	1.0812	0.7449	1.096	0.9226	0.2317	1
carotene diol (3)				0.9526	0.3713	2.3307	0.3713	0.3713	0.3713	0.7084	0.7504	0.8175	0.4428	0.7865	0.9972	1.5126	1.9735	2.5549	0.3713	1	1.355	1.0387	0.3713	2.0054	1.2559	1.2553	0.3713	1.3925	0.5938	1.0292	0.4954	0.3713	0.478
catechol glucuronide				0.3065	3.1945	1.1991	0.532	1	0.2807	0.5585	1.2622	0.3176	0.2955	1.3376	0.2807	0.2807	0.2807	0.4124	0.5208	1.9888	0.5385	1.6162	1.3427	0.2807	0.3062	3.2058	2.8204	0.2807	2.8929	0.7721	2.0325	0.4148	1.0066
catechol sulfate	4918-96-1		HMDB0059724	0.4852	2.106	1.4054	1.26	1.3072	0.3889	0.7825	1.3053	0.6263	0.6091	1.449	0.4385	0.2648	0.2562	0.5615	0.6176	1.8588	1.0327	1.3136	0.9673	0.2886	0.4022	1.4425	1.7398	0.1628	1.6817	1.0725	1.4415	0.6512	1.1281
ceramide (d16:1/24:1, d18:1/22:1)*				0.2417	1.9379	0.0603	0.2248	0.0603	0.0603	0.3407	0.5193	0.2103	0.1916	0.3337	0.0603	0.0603	0.2351	0.1	1.7533	1.4828	1.6444	1.0469	1.891	1.2827	1.2028	2.4902	1.5659	0.82	1.2504	0.9531	0.6429	1.1477	2.8458
ceramide (d18:2/24:1, d18:1/24:2)*				0.8832	0.7595	1.0163	1.1162	0.8187	1.1376	1.0837	1.0131	0.9869	1.0468	0.8123	0.5596	0.8045	1.3305	0.856	0.8914	0.773	0.9378	0.6321	1.0856	1.4682	1.1582	1.2348	1.4576	0.9587	1.2504	0.6665	0.7765	1.1241	1.3284
chenodeoxycholate	474-24-9;474-25-9	C02528	HMDB0000518	1.5669	1.9087	1.6526	1.5451	0.9158	1.5274	3.4492	1.8676	1.2812	0.9162	1.0798	1.5636	1.0094	1.8284	0.9906	0.5859	0.5101	0.4679	0.9726	0.9443	1.9792	0.4135	1.1245	0.7671	0.9222	0.6663	1.6231	0.9248	0.9584	0.3689
cholate	81-25-4	C00695	HMDB0000619	0.1814	1.6597	0.8317	4.8268	1.9397	2.8697	2.0979	0.3393	8.5583	0.2163	0.0981	3.1676	0.6389	33.5181	1.8212	0.9996	2.0376	0.3827	0.0958	6.3611	10.6915	2.3693	0.6368	0.073	0.1611	0.5894	1.0004	0.0424	0.3614	23.2671
cholesterol	57-88-5	C00187	HMDB0000067	0.6829	1.1067	0.8472	1.1913	1.0124	0.9485	0.9276	0.8601	0.8997	0.756	0.8011	0.7694	0.6328	1.0506	0.7219	1.015	1.2252	1.2293	0.9744	1.2326	1.2673	1.2199	1.3208	1.0819	0.9856	0.9876	1.0284	1.0836	0.846	1.5207
cholesterol sulfate	2864-50-8	C18043	HMDB00653	1.1512	0.7938	1.1451	1.1359	1.4064	1.0671	1.1879	1.1629	0.9454	1.1752	1.2354	1.2247	1.0237	1.0393	1.0764	0.6981	0.97	0.6967	0.9658	0.8667	0.7175	0.7366	0.8646	1.0488	1.0784	0.8155	0.9331	0.9763	0.7824	0.9285
choline	67-48-1	C00114	HMDB0000097	0.7234	1.0859	0.7097	1.0912	1.3309	0.8821	0.7578	0.9437	0.9063	1.2315	0.9153	0.671	0.7939	0.7408	0.7239	1.2762	0.9756	1.3223	1.063	1.1473	1.1635	1.3375	1.1344	1.2784	0.8486	1.4308	1.0244	0.9047	0.7379	1.0791
phosphocholine	72556-74-2	C00588	HMDB0001565	0.9958	1.3627	0.7167	1.4695	1.4107	1.5694	1.0858	0.8991	0.9305	1.8115	0.9116	0.5478	1.1668	0.9911	0.7738	1.2967	0.8305	0.9972	1.0028	1.3157	1.0313	0.714	0.9205	1.5521	0.8525	1.9107	1.2368	0.9602	0.7651	1.3384
cinnamoylglycine	16534-24-0		HMDB0011621	0.2464	4.2175	1.0741	0.7838	0.5238	0.3721	0.7059	1.0361	0.8277	0.5625	0.552	0.5831	0.1452	0.3349	0.295	1.3297	3.509	3.6586	2.562	2.2497	0.8479	2.1074	3.0269	2.9671	0.2123	4.8095	1.861	1.7631	0.9639	2.3913
cis-3,4-methyleneheptanoate				0.5914	1.0284	1.0837	0.9863	1.274	2.341	1.4449	0.5914	1.8809	0.5914	1	0.8566	1.165	0.9476	0.5914	1.7083	0.7322	0.7653	0.5914	0.895	1.0939	0.7773	1.5167	1.0511	0.8869	1.0312	0.5914	0.7648	0.6534	0.8208
cis-3,4-methyleneheptanoylcarnitine				0.5333	1.1184	1.1423	2.0935	1.3613	1.7619	2.1313	0.6971	1.6535	0.8773	1.1045	0.9388	0.9457	1.4705	0.6029	0.671	0.8286	1.0844	0.6138	0.845	1.6075	1.4064	1.6354	0.8676	1.0148	0.9852	0.9745	0.559	0.9437	1.6129
cis-3,4-methyleneheptanoylglycine				0.4177	2.1479	1	1.2416	1.0135	1.4877	1.4672	1.0882	1.5754	0.5276	0.9924	1.1693	0.9418	1.1831	0.4746	0.4563	0.9022	1.4011	0.3724	0.7357	1	1.1969	1.5417	0.6495	0.7777	0.5542	1.154	0.5989	0.4587	1.2393
cis-4-decenoate (10:1n6)*	505-90-8		HMDB0004980	0.3003	0.9065	0.7295	2.7444	1.4396	2.0912	3.0739	1.4241	1.2465	0.3516	0.8768	1.5848	1.3954	1.0145	0.6257	1.054	0.6532	0.5404	0.3554	0.4509	2.2554	2.3089	2.0191	0.4286	1.2548	0.5355	0.9388	0.5166	0.9855	1.0487
cis-4-decenoylcarnitine (C10:1)	98930-66-6		HMDB0013205	0.8229	0.8326	1.0207	2.2917	1.2836	1.6119	2.5409	1.1897	2.0635	0.994	1.006	0.9836	1.0747	2.1852	0.8265	1.0082	0.7488	0.9092	0.4742	0.7882	1.6509	1.8414	1.2099	0.5819	0.8346	0.6206	0.8573	0.5319	0.8279	1.1654
cis-aconitate	585-84-2	C00417	HMDB0000072	1.0223	1.182	1.0019	0.9981	0.9707	1.166	1.1728	0.8829	0.9169	0.9896	1.2049	1.1815	1.1754	1.0246	0.9562	0.9912	0.7723	1.5989	0.9314	0.805	0.9574	1.0804	1.0632	1.3632	0.9939	1.5608	0.8843	1.0514	0.746	0.8165
cis-urocanate	7699-35-6		HMDB0034174	1.6575	0.8476	1.5759	1.2193	1.1233	0.8512	0.8294	1.0245	0.8014	2.2555	1.3749	0.5548	1.3868	2.5222	0.7771	0.9163	0.9755	1.5903	0.9373	1.2007	0.4083	0.7239	1.5156	1.803	1.0565	1.1253	0.5691	0.7968	0.4308	0.8823
citrate	77-92-9	C00158	HMDB0000094	0.8827	1.1437	0.9957	0.9672	0.8772	1.1333	1.0511	0.9186	1.001	1.0692	1.0294	1.0777	1.0593	0.9772	0.8951	0.9909	0.8485	1.2426	0.8708	0.8622	0.9136	1.0966	1.0035	1.1577	0.9769	1.2415	1.1642	0.9118	0.999	1.0293
citrulline	372-75-8	C00327	HMDB0000904	1.2532	0.9967	1.0155	0.9552	1.1126	0.9466	1.2445	0.8054	1.1172	1.5313	1.271	0.8396	1.08	1.0863	1.0853	0.8845	0.9484	1.0789	0.9427	0.9218	0.8912	0.8007	0.9006	1.1709	1.1339	1.0033	0.8746	1.0377	0.7339	0.7557
corticosterone	50-22-6	C02140	HMDB0001547	1.775	1.669	0.8496	0.1055	1.5998	0.9731	0.9813	2.0361	1.2171	0.2944	2.5939	0.1799	2.3565	0.6449	1.0187	0.652	1.1672	1.3578	0.3968	0.8804	0.2565	0.3686	1.0466	1.6378	1.4766	1.092	0.0537	1.9693	0.3378	0.8414
creatine	57-00-1	C00300	HMDB0000064	0.7983	1.2988	0.7768	1.4977	1.0468	0.9756	0.9531	0.786	0.954	1.7338	0.969	0.6675	1.3585	0.8895	0.9346	1.1363	0.7948	1.0962	0.8037	1.076	0.8603	0.6192	0.6959	1.2008	1.0244	1.3807	1.0434	1.2322	1.1977	1.1414
creatine phosphate	922-32-7	C02305	HMDB0001511	0.5506	0.9802	0.4644	1.4105	1.6991	1.0387	1.4219	1.0607	0.8012	2.3676	1.0198	1.2722	1.2463	0.3741	0.8622	0.6416	1.5887	1.9507	1.0678	0.2559	0.9452	0.2624	0.2559	0.2559	0.6011	0.529	3.2763	1.4012	0.4045	0.4234
creatinine	60-27-5	C00791	HMDB0000562	0.9204	1.117	0.939	1.1891	1.0401	1.0045	1.0044	0.9813	1.164	1.3017	0.9073	0.8761	1.1868	0.942	0.8658	1.0361	0.9592	1.3158	0.8858	0.9211	0.9956	0.9483	0.8882	1.1879	1.0258	1.1605	1.0089	0.9461	0.878	1.1131
cystathionine	535-34-2	C02291	HMDB0000099	0.9189	1.2058	0.9974	0.9066	0.7036	0.7252	0.924	0.6629	0.825	1.1464	0.8511	0.5344	0.9241	0.7597	1.2161	1.0026	0.8941	1.5201	1.4817	0.9945	1.085	1.0945	1.1411	1.6964	1.3093	1.4146	0.9963	1.0639	1.4571	1.1005
cysteine	52-90-4;56-89-3	C00097	HMDB0000574	0.8168	1.2868	0.7786	0.6538	1.0113	0.9727	0.8213	0.7609	0.7617	1.5337	0.9819	0.7406	0.9999	0.7424	0.7856	1.078	1.1841	1.634	1.2866	1.1758	1.1786	0.9205	1.3672	1.5353	0.9679	1.966	1.0001	1.038	0.6001	1.1013
cysteine s-sulfate	1637-71-4	C05824	HMDB0000731	1.1921	0.5677	1.1556	1.5435	1.0448	1.8759	0.7729	1.9618	0.7243	1.1437	1.3906	2.7971	1.1729	0.5964	1.0707	0.7026	1.4966	1.2994	1.2384	0.9552	0.4409	0.9431	0.5726	0.8768	0.685	1.7558	0.5265	0.8666	0.6131	0.7971
cysteine-glutathione disulfide	13081-14-6	R00900	HMDB0000656	0.7411	1.2448	0.6342	0.8815	1.0031	1.009	0.782	0.8891	0.6187	0.9969	0.7918	0.8137	0.9784	0.7628	0.9555	0.8114	1.2064	1.1591	1.3484	1.1247	1.154	0.9858	1.1775	1.4472	1.04	1.3374	1.3615	1.2189	0.6366	1.4119
cysteinylglycine disulfide*	70555-24-7		HMDB0000709	0.9176	0.8622	0.8615	2.2979	2.2561	1.5299	1.0014	1.186	1.5441	0.9135	1.0915	0.9127	0.792	1.415	1.0062	0.7883	1.1039	0.8817	0.8639	1.2014	1.8822	2.2376	0.8246	0.8141	0.8358	0.7651	1.034	0.9986	0.6955	1.159
cystine	56-89-3	C00491	HMDB0000192	0.9451	0.8359	1.3449	1.4919	0.9559	1.2098	1.2499	1.5942	0.9865	1.0166	1.7354	1.5462	1.2046	0.8863	0.9313	0.9263	0.9596	1.4523	1.2175	0.7538	0.8428	1.0416	1.0135	0.9822	1.0601	0.9065	1.2945	0.8644	0.7836	0.9842
cytidine	65-46-3	C00475	HMDB0000089	0.7726	1.095	0.7937	0.8137	0.9491	0.9029	0.8739	0.7473	1.0798	1.1186	0.6882	0.8168	1.0724	0.9713	1.028	1.7044	0.8844	0.9899	1.072	1.1099	1.0978	1.1552	0.9612	1.0156	1.0672	0.9035	1.047	0.9182	1.0101	1.1814
CMP	63-37-6	C00055	HMDB0000095	0.5842	1.6153	0.1313	1.1343	1.014	1.2074	0.5322	0.6348	0.2352	2.2174	0.986	0.3573	0.9606	0.4375	0.7624	1.5825	0.6994	1.1157	1.0393	1.3294	1.0427	0.6539	0.726	1.5956	0.8362	1.3323	1.126	1.1895	0.7978	1.4126
cytosine	71-30-7	C00380	HMDB0000630	1.4857	0.8885	0.6365	0.5445	1.0972	0.6601	1.0963	0.5366	1.0459	1.392	0.8551	0.9526	1.1529	1.0362	1.4341	1.1664	1.1236	1.8224	0.9735	0.7547	1.4083	0.711	0.9048	1.1518	0.7071	2.1416	0.9315	1.0265	0.661	0.6549
daidzein	486-66-8	C10208	HMDB0003312	1.3649	0.8529	1.4505	0.1881	1.2514	1.2065	0.5651	0.3347	0.5418	1.0373	0.9305	1.3366	1.3862	1.1803	2.0331	0.7	0.6138	0.4038	1.4294	1.4087	0.8217	0.1088	0.4743	1.5211	0.9972	1.9146	0.9107	1.494	1.0028	0.4341
daidzein 7-O-glucuronide			HMDB41718	1.2255	0.5605	1.1675	0.5701	1.6531	0.8883	1.0066	0.1667	1.2267	0.9896	0.7249	1.1988	1.2241	1.7283	1.9323	0.5709	0.9934	0.2908	0.7969	1.9826	1.0319	0.6839	0.1673	1.303	0.515	2.6403	0.4994	1.1399	0.4401	2.8368
daidzein sulfate (1)				0.9285	0.3434	0.1457	0.1457	2.4147	2.1226	1.5796	0.1457	0.1457	0.1457	0.5751	0.1457	0.9376	2.6231	2.2738	0.1457	1.3618	0.2876	0.1457	0.1457	0.1457	1	0.1457	1.0586	0.2065	2.8791	0.1457	0.6907	0.3366	4.9953
daidzein sulfate (2)				1.6126	0.6483	2.0657	0.4243	1.9454	1.4182	1.0365	0.3989	0.8671	1.3524	1.1811	2.0287	1.9381	1.2649	2.8463	0.6259	0.6363	0.4481	0.9098	1.1141	0.5678	0.2031	0.209	0.9635	0.5712	1.6997	0.4254	1.1402	0.5555	1.5279
decadienedioic acid (C10:2-DC)				0.2622	1.3677	0.9587	2.8219	0.8802	2.1068	2.2892	1.6331	1.6453	0.2622	1	1.1334	0.4493	0.6734	0.2622	0.2622	0.3292	0.946	0.2622	0.2622	1.1917	1.4394	1.9351	0.2622	0.3323	0.2622	0.5529	0.2622	0.2622	0.8868
decanoylcarnitine (C10)	1492-27-9		HMDB0000651	1.0849	0.9683	0.8482	2.4148	0.9919	1.2241	2.8689	0.8578	1.6804	1.0497	0.9028	0.5696	0.7439	1.3604	0.3689	1.4195	1.0081	1.2201	0.4462	0.6065	1.5357	1.8113	1.4523	0.6259	0.9118	1.2926	0.9426	0.2898	0.6488	1.5358
deoxycarnitine	6249-56-5	C01181	HMDB0001161	0.9723	0.8317	1.1659	1.6896	1.0048	1.3848	1.2995	0.8261	1.3992	1.3581	0.8642	1.1316	1.2483	1.0672	0.9952	1.0332	0.7902	0.8363	0.8505	0.9392	1.1752	0.8097	1.1997	1.1741	0.8126	1.3062	0.981	0.7077	0.8287	0.932
deoxycholate	83-44-3	C04483	HMDB0000626	3.2234	1.3986	1.4507	1.2541	1.2605	1.4826	2.7353	2.1988	1.8635	1.173	0.8865	1.6362	2.6437	1.1135	1.3855	0.4542	0.296	0.4579	0.5758	0.6498	1.6429	0.4259	0.8647	0.3597	0.6255	0.5732	0.6287	0.5868	0.5034	0.3003
diacylglycerol (16:1/18:2 [2], 16:0/18:3 [1])*				0.317	4.6735	0.317	0.6705	0.317	2.0384	0.4917	0.6764	0.8079	0.7889	0.5346	0.7582	1.6985	0.317	0.6685	1.6883	2.1346	1.5516	1.4409	1	0.6982	1.0921	4.1194	0.317	1.524	0.317	1.8912	0.9395	0.3376	3.6446
dihomolinoleate (20:2n6)	2091-39-6	C16525	HMDB0005060	0.7596	1.1764	1.1916	1.5031	0.8225	1.0706	1.4127	1.3273	1.3717	1.0457	0.8428	0.4843	1.1374	1.1604	0.8902	1.0413	0.7789	0.8244	0.8667	0.7668	1.9373	1.0916	1.259	0.6912	0.9664	0.5833	0.8642	0.6349	1.0336	0.9556
dihomolinolenate (20:3n3 or 3n6)	17046-59-2	C03242	HMDB0002925	0.7406	1.3523	1.1179	1.6458	0.7951	1.2205	1.2838	1.13	1.3105	0.9907	0.7975	0.4898	1.35	0.8963	0.721	1.1008	0.9293	0.8559	0.8583	0.8647	1.7036	1.0687	1.5414	0.8305	1.0674	0.5564	0.8386	0.6912	1.0093	1.0524
dihomo-linolenoylcarnitine (C20:3n3 or 6)*				0.6788	1.2102	0.9237	2.213	1.4701	1.605	1.7376	1.0101	1.5545	0.9106	0.955	0.9681	0.9961	1.7114	0.6557	1.5109	0.9476	1.12	0.7376	0.8965	1.9022	1.6586	1.3246	0.7167	1.0039	0.914	0.9778	0.578	0.7422	1.6631
dihomo-linoleoylcarnitine (C20:2)*				0.5686	1.3472	0.9375	2.92	1.5871	1.5339	2.4494	1.1202	1.9627	0.6952	1.315	0.8991	0.9337	1.8955	0.6262	1.0567	0.9369	0.8309	0.543	0.9433	2.2785	1.7802	1.3911	0.7562	0.9286	0.7602	1.1636	0.5249	0.6634	1.4783
dihydrocaffeate sulfate (2)				0.7407	2.6641	1.917	1.5214	1.3969	0.9854	0.9273	0.9218	0.9509	0.8938	1.3536	0.9389	0.6196	0.4276	0.9348	0.5117	2.2418	1.1513	1.5025	1.1793	0.3426	0.639	2.5141	2.2265	0.3158	1.917	1.0523	1.1916	0.3729	1.0146
dihydroferulic acid sulfate			HMDB0041724	0.699	0.9531	2.4138	1.216	1.2182	2.7911	1.1536	1.7398	1.1088	0.7926	2.1655	0.6277	0.8693	0.5507	1.4733	0.4478	0.7813	1.2247	0.5256	1.1304	0.727	0.1898	0.7425	1.4524	0.2656	4.1674	2.2744	1.0469	0.3313	0.3576
dihydroorotate	155-54-4	C00337	HMDB03349	1.9255	0.8118	0.7853	0.4362	2.7871	0.4627	1.851	0.7422	0.8541	1.714	1.7026	0.8407	0.9795	1.0023	2.2109	0.8913	2.2794	0.9709	4.5027	1.3714	0.9977	0.606	0.8954	5.2232	3.2483	2.0351	0.7292	6.445	0.8181	1.4761
dihydroxyacetone phosphate (DHAP)	102783-56-2	C00111	HMDB0001473	1.6482	1.6521	0.5166	0.3893	1.6766	1.3654	1.1117	0.4855	0.9254	3.6863	1.0688	0.5377	1.0592	0.8413	0.6235	4.1948	0.6319	0.7295	2.2304	0.857	1	1.2024	1.0677	2.095	0.3893	2.8032	0.5324	0.6807	0.4061	0.76
dimethylarginine (ADMA + SDMA)	102783-24-4	C21189,C03626	HMDB0003334,HMDB0001539	0.9124	0.9575	1.2111	1.1514	1.0878	1.0866	0.8183	0.8576	1.1259	1.0313	1.0501	1.2405	1.2649	0.9746	1.1844	1.0137	0.8459	1.067	0.8896	0.7481	0.8995	1.1006	0.8497	0.9863	1.059	0.8176	1.0356	0.8787	0.902	0.762
dimethylglycine	1118-68-9	C03626	HMDB0000092	1.3696	1.0013	0.7905	0.6666	1.4029	0.6729	1.04	1.0002	1.016	1.4352	1.1452	0.7305	0.7481	0.8599	0.9998	0.7084	1.0116	0.8656	1.0583	1.0508	0.75	0.8588	0.9178	1.3027	1.1256	1.0452	0.7066	1.2013	0.7449	0.9644
docosadienoate (22:2n6)	7370-49-2	C16533	HMDB0061714	0.5845	1.7568	0.8933	1.0431	0.7206	0.7811	1.1639	0.9574	0.9596	0.6708	0.5227	0.3992	0.6732	0.9786	0.7417	1.8524	1.1155	1.5133	1.4851	1.1492	2.3007	1.5545	2.3239	0.9248	1.0214	0.8241	1.3134	0.8117	1.0936	1.8074
docosadioate (C22-DC)	505-56-6	C14240	HMDB0061714	0.9281	1.0063	1.049	1.4045	1.5458	1.6119	2.39	1.5498	0.9372	1.0058	1.1049	0.9682	0.5815	1.1904	0.8516	0.5987	1.1834	0.7809	1.4228	0.9954	1.8186	0.7575	1.2927	0.9447	0.8233	1.0046	0.9511	0.974	0.8982	0.8906
docosahexaenoate (DHA; 22:6n3)	6217-54-5	C06429	HMDB0002183	0.7232	1.1326	1.6744	2.5262	0.9143	1.6708	1.4993	1.2492	1.5535	1.2148	0.8514	0.903	1.7918	1.0805	0.6089	1.1493	0.8004	0.7765	0.6991	0.8352	2.1796	1.3123	1.329	0.6061	1.0778	0.4797	0.9106	0.64	0.758	0.9222
docosahexaenoylcarnitine (C22:6)*				0.6525	0.6525	0.8326	2.083	0.6525	1.1435	1.462	0.7347	1.4357	0.6525	0.6525	0.7283	0.8819	1.2485	0.6525	0.9421	0.6525	0.6525	0.6525	0.6733	1.2199	1.2117	1.0089	0.6525	0.6525	0.6525	0.6525	0.6525	0.6525	0.9911
docosapentaenoate (DPA; 22:5n3)	2234-74-4	C16513	HMDB0001976,HMDB0006528	0.8888	1.213	1.2525	2.0598	0.8503	1.4767	1.5446	1.2203	1.1801	1.209	0.9591	0.793	1.8345	0.9765	0.7354	1.1823	0.8073	0.864	0.8246	0.8794	1.6656	1.3713	1.6064	0.7868	1.1641	0.643	0.7486	0.7058	1.0235	0.9691
docosapentaenoate (n6 DPA; 22:5n6)	25182-74-5	C16513	HMDB0001976	0.8017	1.3095	1.1591	1.4805	0.8538	1.0003	1.3905	1.0111	1.5322	1.4859	0.8907	0.5855	1.0766	1.3007	0.7335	1.0544	0.8316	0.7653	0.9997	0.7592	1.5782	0.9733	1.3393	0.7944	1.0755	0.5671	0.8384	0.6631	1.0981	0.9973
docosatrienoate (22:3n3)	59708-86-0	C16534	HMDB0002823	0.4844	1.4235	0.9174	0.8	0.6247	0.6258	1.0748	1.0909	0.9725	0.9532	0.7282	0.3111	0.6715	1.0433	0.5296	2.4709	1.0275	1.6703	1.1323	1.3443	3.0616	1.2602	2.4977	1.0344	0.8841	0.9237	0.9266	0.4798	1.1159	2.131
docosatrienoate (22:3n6)*				1.0149	1.1501	1.5229	1.2224	0.8824	0.9326	1.0158	1.1674	1.6891	1.4536	0.8228	0.2425	0.9544	1.0352	0.8739	0.2425	0.937	0.2425	1.4611	0.8322	0.2425	0.496	1.0574	0.955	1.4135	0.4988	0.9851	0.8971	1.5651	0.2425
dodecadienoate (12:2)*				0.3446	0.7752	0.6349	2.989	1.0558	2.406	2.6345	1.3833	1.3503	0.4245	0.5283	0.7407	0.6252	1.342	0.5256	1.3423	1.002	0.9131	0.4772	0.5206	3.1329	2.6794	1.5067	0.5053	0.998	0.4754	1.1158	0.4445	1.0573	1.4293
dodecanedioate (C12)	693-23-2	C02678	HMDB0000623	0.8519	0.8595	0.7078	1.7422	1.4302	1.4711	1.5761	1.2141	1.2151	1.0176	0.8075	0.6273	1.2744	1.0265	0.7371	1.1985	0.6273	1.4935	0.6273	0.6273	1.119	0.9824	0.8135	0.8599	0.7229	1.0487	0.7863	0.6273	0.7035	0.7853
dodecenedioate (C12:1-DC)*			HMDB0000933	1.373	1.0116	0.9579	1.3455	1.8428	1.143	2.3037	1.5372	1.6112	1.6088	1.4442	0.8166	1.1615	0.9535	2.0612	0.6891	0.505	0.7933	0.7084	0.8378	1.2944	0.8674	1.312	0.9161	0.6426	0.937	0.6766	1	0.7983	0.505
eicosanedioate (C20-DC)	2424-92-2			0.8949	1.1427	0.7891	1.223	1.031	1.1163	1.623	1.2999	0.7369	0.8858	0.8094	0.9935	0.5235	0.7259	0.7833	0.7189	1.197	1.1063	1.4678	1.0806	1.5592	0.844	1.2232	0.957	1.0065	1.2417	0.9615	0.9364	0.8128	1.0353
eicosapentaenoate (EPA; 20:5n3)	10-2005-9;10417-94-4	C06428	HMDB0001999	0.9382	1.0993	1.4639	2.4255	1.0249	2.1088	1.9289	1.409	1.6597	0.9751	0.8434	0.9108	1.8622	1.1424	0.7606	0.8993	0.7633	0.7217	0.7002	0.9219	2.2435	1.6046	1.6181	0.6743	1.2444	0.5386	0.6757	0.6542	0.9221	1.0447
eicosenedioate (C20:1-DC)*				0.9785	1.2335	0.9915	1.6487	0.6113	0.9606	1.8017	1.8192	1.4814	1.3093	1.1084	0.8872	1.3684	0.6101	0.6101	0.9456	0.6101	0.9988	1.4344	0.7228	1.7444	0.6101	1.8329	0.8609	0.7719	1.0012	1.1582	0.7393	0.9762	0.6101
eicosenoate (20:1n9 or 1n11)		C16526	HMDB0002231,HMDB0062436	0.5019	1.5736	0.9353	0.9701	0.701	1.0344	1.4561	1.0678	1.1798	0.8104	0.5636	0.4397	0.961	0.7397	0.5383	1.657	1.0575	0.8229	1.0351	1.0537	1.8682	1.5419	1.5441	0.7437	1.0299	0.638	0.8575	0.702	1.1209	1.2563
eicosenoylcarnitine (C20:1)*				0.3593	1.4391	0.7656	1.7299	1.1872	1.1641	1.9326	0.9578	1.3017	0.6404	1.1105	0.8221	0.8577	1.1852	0.5755	1.1672	0.9428	0.8206	0.574	1.0294	1.6666	2.1061	1.6109	0.6646	0.8191	0.9706	1.188	0.505	0.7789	1.5286
enterolactone sulfate			HMDB0240506,HMDB0240505	1.0156	0.9844	0.8965	1.2225	1.2583	1.5959	0.6059	1.3031	2.038	1.5875	1.0205	0.606	0.9566	1.1655	0.8752	0.2635	1.2819	0.7965	0.8702	2.2813	1.2198	0.7996	0.5918	1.1265	0.8871	2.3238	0.4302	0.551	0.8906	5.5842
equol glucuronide				0.3158	2.2026	0.6653	0.9513	0.7701	0.9333	1.3363	0.7388	2.5768	0.3006	0.7832	0.3002	0.2299	1.0487	0.4165	0.7762	2.3449	1.2484	1.0685	2.8796	2.8484	2.1429	2.0111	2.0504	0.2022	2.6576	1.0953	0.9452	0.6012	7.3449
equol sulfate				0.6751	1.475	0.9025	1.004	1.0676	0.9797	1.0971	0.9145	1.442	0.5927	0.996	0.5589	0.4424	0.5192	0.6358	0.8009	1.4345	1.1406	1.1719	1.4081	1.0538	1.0586	1.7677	1.6891	0.4772	1.4408	0.7274	0.875	0.7624	2.311
ergothioneine	58511-63-0	C05570	HMDB0003045	0.8168	1.2426	0.9259	1.3194	0.7384	1.592	1.3143	1.0378	0.8979	1.0749	0.7306	0.9651	1.2995	0.9916	0.8385	1.1976	0.6746	0.9675	1.0362	1.1583	1.3017	0.6936	0.6839	1.3013	0.7397	1.4967	0.8626	0.7797	1.0084	1.029
erucate (22:1n9)	112-86-7	C08316	HMDB0002068	0.3839	1.9652	0.769	0.8252	0.7662	0.9186	1.4712	0.9304	1.0468	0.6804	0.4563	0.5371	0.7175	0.6327	0.452	2.6854	1.63	1.3392	1.7314	1.7493	2.1774	1.757	2.2784	0.8857	1.2851	0.9532	1.1258	0.9148	1.2259	1.9309
erythritol	149-32-6	C00503	HMDB0002994	1.4623	1.4081	0.7701	0.9297	0.9745	1.0063	0.5662	0.6217	0.9107	0.895	0.8051	0.9937	1.1345	0.8767	1.1089	1.2678	1.4567	1.4592	0.9825	1.2738	0.8545	1.0799	1.4774	1.3556	0.9636	1.2514	0.949	1.0672	0.7133	1.2796
erythronate*	88759-55-1		HMDB0000613	1.4177	1.0821	0.9748	0.8282	1.0258	0.8908	0.9442	0.8538	0.9525	1.1524	0.798	0.8548	1.0115	0.9768	1.127	1.0485	0.977	1.2714	1.0752	1.0835	0.9488	0.8799	0.9885	1.4129	1.0661	1.453	0.8769	1.0451	0.6815	1.0635
ethyl alpha-glucopyranoside	34625-23-5		HMDB0029968	8.5227	0.663	0.6241	2.1494	0.7645	4.2736	2.4526	1.8298	1.0809	0.7634	1.2173	7.4581	0.4683	0.3925	0.9191	0.5209	0.8499	0.5852	3.2349	5.9625	1.6805	0.4343	0.8697	5.8592	0.5319	4.5018	5.0411	7.4168	0.5671	0.386
ethyl beta-glucopyranoside			HMDB0029968	1.5972	0.9254	0.9497	1.0865	0.7259	0.9101	0.9989	0.9007	0.9244	0.9469	0.9145	1.0842	1.0759	1.0011	1.1254	1.0133	1.1593	1.0725	1.083	0.9881	1.1112	0.8068	0.9682	1.1438	1.1294	0.7163	1.4028	1.1583	0.9411	0.8468
ethyl glucuronide	17685-04-0		HMDB0010325	0.282	3.6574	0.282	0.282	0.282	1.2806	0.282	0.282	1.7721	0.282	0.282	0.282	2.0569	0.9037	0.282	0.2915	0.4066	0.9026	0.282	0.4002	0.282	0.282	0.6463	2.4984	0.6057	4.1667	0.282	1.0963	0.282	1.1384
ethylmalonate	601-75-2		HMDB0000622	2.0938	0.9736	1.0221	1.158	1.165	0.9831	1.2683	0.8199	1.0679	1.1052	1.2367	0.8461	1.2206	0.7004	0.9117	0.7323	0.9163	0.7938	1.064	1.0169	0.8384	0.9099	2.859	1.8387	0.8189	1.4682	0.9265	0.6797	0.9045	1.2042
ferulate	537-98-4	C01494	HMDB0000954	1.9259	0.8861	1.7952	0.1657	1.4699	0.9633	0.6315	0.3201	1	1.2557	1.4659	1.4757	1.3121	1.0289	1.5096	0.6472	0.7041	0.1657	1.4461	1.3081	0.1845	0.1657	0.5195	1.0962	0.9389	0.8648	0.1657	1.5722	0.668	0.3902
ferulic acid 4-sulfate	86321-29-1		HMDB0029200	1.4577	0.9782	1.5419	0.3849	1.9207	1.8197	0.7061	0.4013	1.3532	1.6395	1.3165	1.7484	1.2865	1.2901	1.7346	0.455	0.8433	0.7134	0.8791	1.1061	0.3505	0.3407	0.5592	1.5257	0.767	2.4537	0.29	1.0218	0.5037	0.7326
FAD	146-14-5;84366-81-4	C00016	HMDB0001248	0.8292	1.531	1.0671	0.9332	1.2082	1.2119	0.9088	0.8792	0.8739	1.7075	0.9769	0.4576	0.8031	0.4825	0.7637	1.5209	1.0781	1.5203	1.0276	1.0231	0.8866	1.1252	1.1065	1.5907	0.7746	1.3529	1.0866	0.6261	0.5181	0.7976
formiminoglutamate	816-90-0	C00439	HMDB0000854	1.7311	0.9689	1.37	2.0452	1.089	1.7586	1.3032	1.0311	0.424	0.7122	0.5297	0.5175	2.3882	0.5038	0.5923	1.1517	0.5661	0.6376	1.3645	1.846	0.5424	0.4717	0.9574	1.5359	1.1531	1.0723	0.3696	1.3699	0.3154	0.7696
fructose	57-48-7	C00095	HMDB0000660	0.9944	1.0707	1.1689	0.9373	0.9854	1.0228	0.981	2.855	0.7407	0.3283	1.0273	1.1996	0.6293	1.0129	0.6582	0.408	1.0326	0.7424	1.2816	1.0056	2.7208	0.9224	1.2395	0.4005	1.3347	0.2593	1.4584	0.8685	0.7621	1.3692
fructosyllysine	21291-40-7		HMDB0034879	1.0311	0.8841	1.5267	1.1753	0.9473	1.5233	1.145	0.8764	1.3731	0.9451	0.925	1.7641	1.0624	1.0175	1.0299	0.8354	0.8284	1.2159	1.226	0.9384	1.0014	1.0884	0.9478	1.2086	0.9986	0.8163	0.9865	0.8916	0.7613	0.7372
fumarate	100-17-8	C00122	HMDB0000134	0.8389	1.0457	0.6783	0.6963	0.8714	1.5431	0.6751	0.709	0.861	1.3642	0.7845	0.9631	1.0727	0.7613	1.1501	1.1873	0.9977	1.901	0.9557	1.0792	1.3985	0.6383	1.0672	1.7661	1.0023	2.1721	1.3711	0.9063	0.7381	1.0824
galactonate	299-28-5	C15930,C00880	HMDB0000565	0.6955	1.6099	0.7962	1.0198	0.9225	0.7684	0.7009	0.6547	0.6627	0.9486	0.5548	0.5149	0.6894	0.471	0.6842	1.2091	1.4492	1.3905	1.5371	1.0515	1.0922	1.0497	1.5494	1.5061	0.9802	1.284	1.3956	1.0937	0.5598	1.6584
gamma-glutamylalanine	5875-41-2	C03738	HMDB0029142	0.5668	2.1267	0.659	0.5852	1.0029	0.9559	0.732	0.7484	0.784	0.6218	1.1051	2.7061	0.7696	1.3929	1.0987	1.6078	1.2201	1.4469	1.0996	0.7971	0.9955	0.9711	0.951	1.1627	1.2206	1.1372	0.9971	1.5681	1.884	0.7846
gamma-glutamylcitrulline*				1.0003	0.9997	0.6334	0.7924	1.2094	0.8296	1.2198	1.1801	0.9325	0.4035	1.4397	1.3238	0.3357	0.9834	0.9586	0.7067	1.7812	1.3929	1.4739	0.7288	1.1015	1.3905	1.3185	0.8795	1.4744	0.7321	1.261	1.4535	0.5442	0.8153
gamma-glutamylglutamate	1116-22-9	C05282	HMDB0011737	0.5622	1.4467	0.6201	0.891	0.8418	0.827	0.9472	0.8414	0.7686	0.8925	0.6218	0.417	0.5649	1.0755	0.6064	1.026	1.3454	1.2797	1.0208	1.3385	1.0503	1.0495	1.6138	1.5024	0.9894	1.6398	1.0106	1.1974	0.6997	1.1823
gamma-glutamylglutamine	10148-81-9	C05283	HMDB0011738	0.8074	0.9127	0.6112	0.6264	0.4867	0.7444	1.0141	1.0827	0.8488	0.5204	1.1267	1.0456	0.4178	1.1383	1.0057	0.7796	1.2089	1.0951	1.5266	0.9943	1.1923	1.172	1.2269	0.9732	1.0217	0.9196	1.0156	1.2585	0.7947	0.8575
gamma-glutamylglycine	1948-29-4		HMDB0011667	0.6239	1.1308	0.6351	0.6663	0.8878	0.649	0.8051	0.7571	0.7412	0.7871	0.8317	0.7599	0.7225	1.0001	0.7933	0.9999	1.2651	1.2905	1.3439	1.104	1.4301	1.2052	1.1123	1.1431	1.4841	1.0838	0.9741	1.2041	1.0032	1.0395
gamma-glutamylhistidine	37460-15-4		HMDB0029151	0.6527	1.3011	0.7064	0.716	1.0496	0.7808	0.9674	0.6037	0.8811	0.8483	0.8634	0.8887	0.8194	1.0068	0.9449	1.0609	1.2559	1.4231	1.6379	1.413	0.6946	1.0922	0.7986	1.0463	1.3351	1.1726	1.1187	1.5071	0.9932	1.2889
gamma-glutamylisoleucine*			HMDB0011170	0.7708	1.6109	0.7213	0.8042	0.8458	0.6729	0.7062	0.7002	0.715	1.0121	0.8007	0.791	0.8579	0.8513	0.7923	1.0242	1.116	1.4688	1.2577	1.3182	1.5213	1.2748	1.3135	1.352	1.4163	1.3256	0.9879	1.4766	0.9768	1.2622
gamma-glutamylleucine	2566-39-4		HMDB0011171	0.8231	1.2046	0.6486	0.6065	1.0559	0.7582	0.6961	0.7778	0.645	1.0239	0.8411	0.7145	0.5856	0.9575	0.9809	0.8804	1.2616	1.3965	1.4283	1.372	1.2167	1.0685	1.1314	1.6523	1.3179	1.283	0.9821	1.742	0.8618	1.0179
gamma-glutamylmethionine	17663-87-5		HMDB0029155	1.0058	0.5993	0.4066	0.3323	1.2819	0.8007	0.7673	0.6412	0.7825	0.3332	1.225	2.2141	0.1955	1.3036	1.9637	0.4423	2.1191	1.4819	2.2469	0.9632	1.557	0.8879	2.2406	1.3782	1.4543	1.1379	0.9942	1.844	0.4544	0.6356
gamma-glutamylphenylalanine	7432-24-8		HMDB0000594	0.9246	1.1605	0.7132	0.5976	1.1748	0.93	0.6842	0.7943	0.7218	1.0112	0.98	0.9435	0.7975	1.0356	1.1509	0.9888	1.304	1.3902	1.5545	1.5425	0.8508	0.7771	1.0596	1.7352	1.2328	1.4898	0.8567	1.8132	0.8396	1.1367
gamma-glutamylserine	5875-35-4		HMDB0029158	0.777	0.9411	0.8652	0.6565	1.1421	1.0038	1.062	0.974	0.8178	0.8876	1.1842	1.1667	0.7506	1.2126	1.1864	0.9962	1.0849	1.1986	1.6366	0.9713	1.0211	0.8507	1.2008	1.0965	1.2831	0.9706	0.9049	1.4999	0.7653	0.9222
gamma-glutamylthreonine	5652-48-2		HMDB0029159	0.701	1.1624	0.6435	0.6745	1.021	0.8503	1.0434	0.8642	0.8801	0.3878	0.809	0.8626	0.6409	0.7984	0.7815	0.9174	1.431	1.2996	1.4457	1.2287	1.506	1.4064	1.1686	1.265	1.2354	1.1347	1.0403	1.5617	0.8741	0.979
gamma-glutamyltryptophan	66471-20-3		HMDB0029160	0.7412	1.0018	0.7693	0.9655	1.3597	1.1105	0.9375	1.1958	0.9982	0.8652	1.1244	1.2869	0.8148	0.8913	1.0326	0.6509	1.1836	0.9241	1.1985	1.1017	0.6275	0.7655	1.3769	1.4042	0.8434	1.1727	0.7927	1.3027	0.5584	1.1427
gamma-glutamyltyrosine	7432-23-7		HMDB0011741	0.793	0.9803	0.5824	0.5316	1.0948	0.8742	1.0135	0.5363	0.7225	0.8206	0.8415	1.0831	0.8185	1.2055	0.9865	0.795	1.2186	1.1177	1.0884	1.3077	1.2585	0.5642	1.2584	1.3529	1.3493	1.2826	0.6623	1.531	0.7183	1.2515
gamma-glutamylvaline	2746-34-1		HMDB0011172	0.5403	1.7112	0.4325	0.6765	0.7477	0.6429	0.5886	0.6036	0.5377	0.7405	0.6782	0.615	0.6397	0.7275	0.5823	1.3223	1.3858	1.8119	1.2651	1.2906	1.7898	2.5469	1.2781	1.2828	1.2863	1.2706	1.0862	1.3806	0.9138	1.3342
gamma-tocopherol/beta-tocopherol		C14152,C02483	HMDB0006335,HMDB0001492	0.5504	0.7931	1.3555	2.3205	0.9738	1.687	0.8908	0.6786	1.0262	0.4151	0.7056	1.1156	0.7538	0.878	1.6353	0.3621	1.4275	1.3583	1.1001	0.715	1.0394	0.6939	1.5458	2.4378	0.7028	1.5326	2.2835	0.8209	0.2316	1.1201
genistein	446-72-0	C06563	HMDB0003217	0.8627	1.0624	1.4695	0.3068	1.185	1.3711	0.671	0.2799	0.6344	1.2498	0.6249	1.1575	1.0108	0.9892	1.9232	0.833	0.6125	0.4929	1.6758	1.5147	1.3978	0.1169	0.6738	1.7057	0.7683	2.2024	1.1184	1.5567	0.6645	0.7996
genistein glucuronide*				1.14	0.2983	0.9815	0.6889	1.5661	1.1085	1.3281	0.1435	1.6222	0.7306	0.7455	1.1877	1.0185	2.2823	2.3258	0.4061	1.1349	0.0962	0.525	2.4557	1.6701	1.0272	0.1491	0.971	0.3314	2.9865	0.3369	0.8421	0.2892	3.5327
genistein sulfate*				1.6351	0.4201	2.5987	0.4937	1.7196	1.2138	1.2481	0.4962	0.9632	1.5677	1.0368	1.6498	1.4726	1.4102	2.5443	0.5402	0.6407	0.3618	0.8191	1.098	0.7017	0.2756	0.2849	0.7439	0.5402	1.2878	0.4731	1.1588	0.5252	1.3281
gluconate	527-07-1	C00257	HMDB0000625	0.9934	0.6575	0.7785	1.0127	0.7004	1.2955	0.9787	0.9454	0.7556	1.3643	1.0206	1.1242	1.3744	0.7175	1.0242	0.7707	0.6028	0.9205	0.5656	0.9507	0.9436	1.0714	1.8439	1.8415	1.4244	1.2849	0.9138	1.1572	1.0066	1.837
glucose	50-99-7	C00031	HMDB0000122	0.997	1.0965	0.9595	1.1373	0.8051	1.3082	1.0799	1.0157	1.1538	0.8383	0.8719	0.992	0.9429	0.8882	0.8683	0.6712	1.01	1.1869	0.997	0.9789	1.3563	1.0871	1.3111	1.1255	1.003	0.7933	1.2567	0.7681	0.6798	1.3869
glucuronate	207300-70-7	C16245	HMDB0000127	0.9731	1.6924	0.6649	0.7135	0.7612	0.6078	0.844	0.7244	0.8649	0.8045	0.5695	0.5646	0.6042	1.0172	0.5187	0.9828	1.8624	1.3113	1.7325	1.9751	1.4089	1.5377	1.5241	1.553	1.2296	1.2248	1.2503	1.2951	0.6747	2.2692
glucuronide of C10H18O2 (11)*				1	0.3147	1.0205	0.8906	0.8857	1.0206	1.7454	1.1265	0.4327	1.0127	1.2598	0.6074	1.1338	0.2759	0.5989	0.2759	0.2759	0.2759	0.2759	0.2759	0.2759	0.2759	0.2759	0.2759	0.2759	0.2759	0.2759	0.2759	0.2759	0.2759
glucuronide of C14H22O4 (1)*				1.6389	0.4458	1.4396	2.9308	0.575	1.9279	1.4194	0.8908	0.8201	0.4458	0.4458	2.1349	1.2925	1.1092	0.7775	0.4458	0.4458	0.4458	0.4458	0.4458	0.8338	0.7422	0.4458	0.4458	0.4458	0.4458	0.4458	0.4458	0.4458	0.5686
glucuronide of C14H22O4 (2)*				1.8251	0.6253	1.3025	0.9907	1.1828	0.8164	1.6851	1.5121	1.0092	0.9908	1.181	0.6253	0.7526	0.7798	0.7791	0.6253	0.6253	0.6253	0.6253	0.6253	0.6253	0.6253	0.6253	0.6253	0.6253	0.6253	0.6253	0.6253	0.6253	0.6253
glutamate	56-86-0	C00025,C00217	HMDB0000148	0.7797	1.323	0.7406	1.7411	1.0765	1.4053	1.023	0.6637	0.8458	1.8393	0.7688	0.4004	1.3126	0.9804	0.976	1.3518	0.6725	0.909	0.8229	1.2758	0.9668	0.5368	0.8065	1.6126	0.8754	1.7854	1.0196	1.0962	1.0839	1.2109
glutamine	56-85-9	C00064	HMDB0000641	1.1236	0.8682	1.0295	1.1171	1.0056	1.1201	0.9881	1.0071	1.0118	1.1459	0.9266	0.9386	0.9694	0.985	1.1325	1.0439	0.9269	1.0238	1.0234	0.9944	1.0902	0.904	0.9433	1.0579	0.8823	1.0234	0.9022	0.8812	0.9567	0.87
glutamine_degradant*	2353-44-8			1.3865	0.9271	1.0089	0.8222	0.9944	0.9546	0.9699	0.9851	1.2095	0.9742	1.113	0.9614	0.6655	1.0477	0.9773	0.7934	1.0267	1.0558	1.0369	0.8479	0.8375	1.1547	1.2514	1.3105	1.0683	1.0056	0.909	1.0926	1.1332	0.9295
glutarate (C5-DC)	110-94-1	C00489	HMDB0000661	1.9238	1.421	0.4534	0.6895	1.1764	0.5614	1.7344	0.4995	1.2448	1.201	1.0551	0.4006	1.4419	0.7158	1.3047	0.3334	0.8445	0.3455	1.3159	1.5025	0.5244	0.4369	1.8101	1.1334	1.0019	1.4958	0.4326	0.8348	0.2978	0.9981
glutarylcarnitine (C5-DC)	102636-82-8		HMDB0013130	1.151	0.8425	0.718	1.0052	1.3382	1.8532	1.2015	0.9244	1.0166	1.5124	0.7863	0.9882	1.5185	0.661	0.7795	0.7216	0.903	0.9948	1.102	1.228	1.4178	0.613	1.2397	1.2774	0.7579	1.9173	0.8477	0.4513	0.3914	1.1386
glutathione, oxidized (GSSG)	103239-24-3	D00031,C00127	HMDB0003337	0.6817	2.4637	0.3763	0.8695	1.2043	1.0497	0.7398	0.5844	0.8138	1.286	0.4718	0.3504	0.7607	0.9503	0.7856	0.8048	1.3355	0.9033	1.4662	1.6619	2.0346	0.9294	1.3629	2.0992	1.062	1.8107	1.5393	1.5817	0.7789	2.2669
glycerate	600-19-1	C00258	HMDB0006372,HMDB0000139	1.1405	1.2076	0.9516	0.8406	1.026	0.9105	0.9152	0.8964	0.9107	1.0311	0.9691	0.8441	1.1084	0.8647	0.9117	1.0363	1.0431	1.1509	1.1988	1.118	0.9659	0.8567	0.974	1.3389	1.1466	1.4424	0.8587	1.0628	0.9015	1.0731
glycerol	56-81-5	C00116	HMDB0000131	1.0044	1.1487	0.99	1.2481	0.9956	1.5966	1.6216	0.9348	1.44	1.1874	0.8738	0.5564	0.8892	0.7246	0.5991	1.5636	0.8965	1.2756	0.9586	1.0405	1.5975	1.3527	1.6752	1.3541	0.9162	1.4015	0.8515	0.6026	0.893	0.9365
glycerol 3-phosphate	29849-82-9	C0093	HMDB0000126	0.911	2.0057	0.5646	1.0264	0.8012	0.971	0.6949	0.5702	0.6024	2.217	0.4719	0.2548	1.2827	0.5579	0.6574	1.2246	0.9095	1.0255	1.4636	2.0696	1.4703	0.8281	1.3903	2.331	1.0044	2.3573	0.9956	1.1559	0.8388	1.4129
glycerophosphoethanolamine	33049-08-0	C01233	HMDB0000114	0.8938	1.4644	0.8321	1.142	1.1753	1.2141	0.8101	0.8498	0.878	1.8323	0.8982	0.5485	1.1602	0.9696	0.8075	1.8528	0.7123	0.8362	1.0373	1.2624	0.8426	0.6861	0.9231	1.2943	1.0272	1.1281	1.0102	1.0182	0.9898	1.1992
glycerophosphoglycerol		C03274	HMDB0240316	0.8519	1.7399	0.7173	1.0579	0.8662	1.4749	0.5404	0.5543	0.7218	1.6461	0.5825	0.5591	1.1131	0.6936	0.8088	1.1916	0.8271	0.9776	1.0655	1.2702	1.2069	0.804	1.0475	1.3579	1.0396	1.32	1.0224	0.9175	0.6678	1.5407
glycerophosphoinositol*	16824-65-0			1.3644	1.1382	0.9402	0.6753	0.9183	0.511	0.668	0.7166	0.5457	1.5308	0.7878	0.5416	0.7656	1.0253	0.8913	1.0993	0.9798	1.1591	0.8938	1.5695	0.9613	1.2954	1.7873	1.4403	1.4243	1.5635	1.0202	0.9622	1.2904	1.4309
glycerophosphorylcholine (GPC)	28319-77-9	C00670	HMDB0000086	1.0011	1.1611	1.0835	1.053	0.8693	1.1614	0.8671	1.0826	0.8252	1.236	0.8777	0.5939	1.1088	0.8383	0.719	1.2556	0.7882	0.9007	0.9989	0.9665	1.0276	0.7829	1.2293	1.1546	1.0281	0.9534	1.1043	0.8804	0.9032	1.162
glycerophosphoserine*				1.0077	0.9923	0.8796	1.1873	1.0991	0.9855	1.0995	0.8709	0.8614	2.4609	0.8262	0.8801	1.2908	0.9146	0.7317	1.1411	0.8786	1.1021	0.7798	1.095	0.873	1.0294	1.3252	1.241	0.8153	1.1232	0.99	1.0388	0.7584	1.1652
glycine	56-40-6	C00037	HMDB0000123	0.8738	0.9303	0.9418	1.2118	1.0761	1.0073	0.9874	0.8331	1.0255	1.3259	1.0292	0.9927	1.243	0.989	1.1617	1.0665	0.85	0.9223	1.0856	0.8704	1.0457	0.792	0.8685	1.0359	1.1711	1.1719	0.8656	0.9203	1.0409	0.9578
glycine conjugate of C10H14O2 (1)*				0.8865	1.4911	1.6802	1.1109	0.7418	0.4436	0.7599	0.9178	1.2827	1.051	0.8475	0.6641	1.1028	0.9864	0.9829	1.0136	0.8846	1.4783	0.7301	0.7063	0.957	1.2088	1.0344	1.0819	1.4354	1.3362	1.1455	0.5746	1.0777	0.9336
glycine conjugate of C6H10O2 (2)*				0.3963	3.2445	0.3852	0.6918	0.5499	0.4221	0.7168	0.5382	0.4634	0.8457	0.4361	0.3007	0.5382	0.412	0.3487	1.7353	3.4863	4.7115	1.7937	2.4168	2.1995	2.3813	2.6075	2.3366	1.2749	4.1379	2.4105	1.1543	0.7793	2.9111
glycine conjugate of C6H10O2 (3)*				0.4775	2.9653	0.5563	1.1883	0.4703	0.9215	1.7779	1.2054	0.9413	0.4406	0.8911	0.4921	0.6	1.0587	0.4406	0.4406	0.4406	0.4406	0.4406	1.6818	1.1536	2.7721	2.3596	1.2565	0.4406	0.4406	0.4406	0.4406	0.7999	0.4406
glycitein sulfate (2)				1.0043	0.3818	2.1808	0.571	2.404	1.0487	1.6984	0.6134	1.7107	1.4088	1.898	0.7586	0.7968	1.3786	1.8132	0.4146	0.8505	0.2362	0.4827	1.3976	1.1684	0.9767	0.2591	1.2501	0.266	2.3047	0.3446	0.9957	0.582	2.6242
glyco-beta-muricholate				0.0872	0.0872	0.0872	1.8819	0.6655	1.0596	0.8884	0.0872	2.3373	0.0872	0.0872	0.0872	0.0872	8.3873	0.8513	0.0872	0.9004	0.0872	0.0872	2.2584	1.8626	0.9404	0.0872	0.0872	0.0872	0.7874	0.0872	0.0872	0.0872	5.9188
glycocholate	475-31-0;863-57-0	C01921	HMDB0000138	0.0133	0.0555	0.0578	1.1948	1.2285	1	1.9654	0.0133	3.3954	0.0623	0.0295	0.2335	0.027	6.8101	0.7216	0.0133	1.2954	0.0133	0.0175	1.9471	2.8195	1.8481	0.0133	0.0133	0.0133	0.911	0.0133	0.0133	0.0133	4.3566
glycolate (hydroxyacetate)	79-14-1	C00160	HMDB0000115	1.5009	0.9249	1.2004	0.9947	1.3613	1.0053	1.1248	1.1151	1.0524	1.6895	1.139	1.0753	1.2647	1.4065	0.8908	0.6995	1.1478	0.7727	0.8982	1.0302	0.8005	0.8147	0.9286	0.7895	0.8476	0.9801	0.5894	0.9278	0.4519	1.1788
glycosyl ceramide (d16:1/24:1, d18:1/22:1)*				0.4382	1.4968	0.6299	0.7918	0.7227	0.4935	0.7046	0.8591	0.5495	0.2315	0.5676	0.245	0.2618	0.5266	0.5361	1.0786	1.3336	1.589	1.4411	1.8425	1.5522	1.4013	1.5702	1.9268	1.1242	1.3219	0.9214	1.3396	1.5526	2.2443
glycosyl ceramide (d18:1/20:0, d16:1/22:0)*				0.6716	0.7918	1.0175	1.34	1.2517	1.2579	1.0661	0.8925	0.9194	0.7827	0.8007	0.8151	0.7286	0.8553	0.8117	0.8404	1.0211	0.9486	1.1102	0.9943	1.434	1.4743	1.1642	1.6361	1.3918	0.8981	0.6937	1.6134	1.2877	1.0057
glycosyl ceramide (d18:1/23:1, d17:1/24:1)*				0.9761	0.915	1.3188	1.4489	1.2335	1.1517	0.9339	1.4194	1.1152	1	0.9563	0.2926	0.8844	1.1224	0.2926	0.5364	0.8068	0.8878	1.0327	0.976	1.2447	0.9062	1.2071	1.5088	1.2514	0.9435	0.7164	0.5625	1.0683	1.1752
glycosyl ceramide (d18:2/24:1, d18:1/24:2)*				0.9745	0.7836	1.2773	1.3041	1.3062	1.0236	1.1615	1.25	1.2353	0.9483	0.9764	0.6509	0.8584	1.2203	1.2185	0.6529	0.7999	0.8778	0.9546	0.8938	1.2414	1.04	0.8365	1.2908	1.0743	0.7993	0.6462	1.2026	1.0263	0.9597
glycosyl-N-behenoyl-sphingadienine (d18:2/22:0)*				0.5471	1.1636	0.6177	0.378	0.6413	0.9836	0.4878	0.6606	0.4968	0.6451	0.5227	0.5023	0.4833	0.4832	0.5343	1.1399	1.126	1.0445	1.3152	1.4613	1.5114	1.7039	2.3809	1.6991	1.2852	1.2781	0.5994	1.2147	1.0164	1.481
glycosyl-N-nervonoyl-sphingosine (d18:1/24:1)*			HMDB0010712,HMDB0004975	0.8403	0.2079	1.1874	0.2079	0.2079	0.2079	1.1377	1.1515	1.0001	0.7955	0.2079	0.2079	0.2079	1.2954	0.2079	0.2079	0.2079	0.2079	0.2079	0.8603	1.0933	0.2079	0.9999	0.2079	0.2079	0.8097	0.2079	0.2079	0.2079	0.2079
glycosyl-N-palmitoyl-sphingosine (d18:1/16:0)				0.9242	0.6958	1.215	1.548	1.511	1.3322	1.2689	1.2296	1.1478	0.9162	1.0138	0.8858	0.8729	1.1636	1.1458	0.6932	0.8418	0.8807	0.8226	0.7305	0.9862	1.0215	0.8472	1.2439	1.1336	0.6672	0.7176	1.1255	1.024	0.9367
glycosyl-N-stearoyl-sphingosine (d18:1/18:0)				1.431	0.3362	2.0689	3.3701	2.9563	3.1818	2.6242	2.2138	1.6495	1.376	1.7829	1.6483	1.4386	1.8933	1.3561	0.3577	0.432	0.3862	0.3976	0.3617	0.5243	0.5296	0.3864	1.0472	0.9264	0.3764	0.3211	0.9528	0.805	0.3798
glycosyl-N-tricosanoyl-sphingadienine (d18:2/23:0)*				0.8019	0.9469	1.6888	1.7623	1.7509	1.9479	0.851	1.2719	1.5719	0.9888	1.3937	1.2968	0.784	1.326	0.2475	0.2475	1.0567	0.8573	0.6386	0.5591	0.8534	0.8516	0.5592	1	1.0282	0.7042	0.794	1.0233	1.1158	1.1976
glycylvaline	1963-21-9		HMDB0028854	0.9051	0.8047	0.6854	1.1967	0.9272	1.0352	0.4023	0.5432	1.1006	0.8936	0.8297	0.8146	0.5586	1.3925	0.8872	0.4023	1.294	1.1186	1	1.2555	1.8889	1.6094	1.0938	1.1621	1.0689	1.302	0.9812	0.7505	0.4892	1.1127
guaiacol sulfate			HMDB0060013	0.9669	5.1011	1.6256	0.9043	0.3253	0.2842	0.2413	0.9302	0.0976	0.5887	0.29	1.789	0.0976	0.0976	0.0976	0.0976	2.6171	1.7449	1.6484	1.4186	0.0976	0.7076	5.4361	2.8616	0.5035	3.3512	1	1.7018	0.5775	1.3558
guanidinoacetate	352-97-6	C00581	HMDB0000128	0.9003	0.8711	1.238	1.2474	1.4851	1.6022	1.2863	0.8223	1.2332	1.1151	0.9552	0.986	0.9322	1.014	0.9322	1.0355	0.8151	0.9351	1.072	0.9113	1.0471	0.9226	0.9233	1.4538	1.0179	1.3263	1.2099	0.8601	0.9409	0.5938
guanidinosuccinate	6133-30-8	C03139	HMDB0003157	1.5679	0.6478	1.2472	1.0229	0.5157	1.317	1.3306	1.5133	1.3816	1.0025	0.5232	0.6175	1.3318	0.7723	0.6063	0.6083	0.3587	1.0785	0.6921	0.7548	1.995	0.3807	1.3162	1.1366	1.0888	1.7564	0.3502	0.651	0.7714	0.9975
guanosine	118-00-3	C00387	HMDB0000133	2.2653	0.5841	0.3746	2.6992	1.9319	2.3905	0.5322	2.0477	1.078	1.1116	2.2691	1.2621	0.8586	1.3586	2.161	0.6629	0.4131	0.4722	1.463	0.5871	1.4654	0.8697	1.4827	0.7995	1.6844	0.4796	0.0859	0.922	0.8557	0.565
5'- GMP	5550-12-09	C00144	HMDB0001397	0.0428	1.8149	0.0133	0.2172	0.4242	0.4429	0.0133	0.0133	0.0133	1.0538	0.4908	0.044	0.0172	0.0133	0.4008	1.4986	0.9491	1.5248	1.5544	1.3167	1.0509	1.1029	0.6353	1.5706	0.5166	1.5577	1.1414	1.3245	0.5383	1.2962
gulonate*	20246-53-1	C00800	HMDB0003290	0.6536	2.3831	0.2911	0.3581	0.887	0.5052	0.7825	0.5303	0.4214	0.7441	0.3109	0.3699	0.5246	0.222	0.3646	1.277	2.0362	2.4917	2.7942	2.1547	1.3544	1.7488	2.14	3.7918	1.113	3.3096	1.4605	1.3044	0.3999	2.3059
heme	14875-96-8	C00032	HMDB0003178	1.989	1.6127	0.452	1.1948	1.2399	1.0691	1.2722	0.9952	0.6128	3.0523	1.4371	1.2167	0.8169	0.3048	0.3914	1.7182	0.9107	1.0048	0.7866	1.2306	0.2747	0.6347	0.1855	0.8948	0.886	1.1456	0.9399	1.0993	1.2735	0.5492
heneicosapentaenoate (21:5n3)	24257-10-1			0.9681	0.363	1.6556	1.0615	0.4946	0.363	1.6053	0.363	1.4548	1.1956	0.8423	0.363	1.518	1.1228	0.363	0.7223	0.363	0.363	1	0.363	2.3306	1.5397	0.363	0.5383	0.8383	0.363	0.363	0.5293	0.8786	0.363
heptadecanedioate (C17-DC)	2424-90-0			1.0878	0.8663	0.871	1.89	2.0546	1.6166	3.1285	1.452	2.0758	1.1937	1.1492	0.65	0.4922	1.0329	0.6169	0.6829	0.96	0.6605	0.9184	0.9079	1.3633	1.288	1.0972	1	0.8804	1.363	0.4922	0.6148	0.6376	0.7809
heptanoate (7:0)	111-14-8	C17714	HMDB0000666	0.9436	1.0645	0.4171	1.3833	1.6172	1.1647	1.7431	1.2691	1.3812	1.2034	1.3673	0.5341	0.6414	0.5232	0.6217	1.2852	1.0324	0.4969	0.9889	0.8545	0.8159	0.9821	0.8388	1.1597	0.92	1.6982	0.7557	1.1592	0.8996	1.0111
heptanoyl glycine	23783-23-5		HMDB0013010	0.7996	2.284	0.4545	0.8735	1.1335	0.1456	0.8872	0.5135	0.5999	1.4977	1.1719	0.0752	0.5232	0.4306	0.5262	0.4911	1.8874	2.0415	2.1379	2.6842	0.9695	1.0565	2.1233	2.7735	1.1522	5.4792	0.5594	1.018	0.982	1.7773
heptenedioate (C7:1-DC)*				0.6566	1.1152	1	2.1216	1.0838	2.1763	0.8308	0.9902	1.2406	0.5783	1.1612	1.9847	1.7646	0.821	0.7136	0.3035	0.3035	0.3035	0.3035	0.3035	1.1523	0.3035	0.8728	0.3035	0.3035	0.3035	0.6899	0.3035	0.3035	0.3035
hexadecadienoate (16:2n6)	28290-73-5		HMDB0000477	0.4383	1.2456	0.6093	2.685	0.9585	1.5588	1.7334	1.0789	1.2792	0.5837	0.6565	0.706	1.4016	0.9588	0.6738	0.8821	1.0723	1.1868	0.7065	0.7306	2.164	1.784	1.4653	0.5625	1.0412	0.5641	1.1088	0.5162	0.7833	1.2315
hexadecanedioate (C16)	505-54-4	C19615	HMDB0000672	0.9794	1.0901	1.0206	3.4281	2.7111	2.1012	4.592	1.4868	2.1451	1.2841	1.3232	0.7542	0.9685	0.844	0.8611	0.8237	0.9579	1.0914	0.9277	0.8102	1.5256	0.9113	1.3135	1.0986	0.6775	1.4491	0.7523	0.6007	0.5097	0.8929
hexadecatrienoate (16:3n3)	7561-64-0			0.5109	1.0469	0.7243	2.2532	1.15	1.551	2.0962	0.983	1.6491	0.6401	0.7566	0.6412	1.0415	1.1403	0.5916	0.8479	0.6923	0.9908	0.4749	0.592	1.8414	1.8458	1.6767	0.4581	1.0484	0.4751	1.0961	0.4565	1.0092	1.117
hexadecenedioate (C16:1-DC)*				0.6528	1.0931	1.0014	3.0413	1.8372	1.7373	3.1951	1.0955	2.004	1.517	1.1556	0.651	0.9986	0.8467	0.8943	0.6809	0.8639	1.1361	0.6197	0.9566	1.5143	0.8374	1.4204	0.935	0.7224	1.4389	0.9094	0.355	0.7047	1.0193
hexanoylcarnitine (C6)	6920-35-0		HMDB0000756	3.5552	1.0323	0.5248	1.9559	1.4285	0.6092	3.7546	0.698	1.2754	1.2847	1.833	0.2449	0.7597	1.3765	0.7672	0.6914	0.6387	0.73	1.0202	1.5637	0.9237	0.9796	2.6473	2.2738	0.9544	2.7246	0.6741	0.4465	0.9798	1.1431
hexanoylglycine (C6)	24003-67-6		HMDB0000701	1.0796	2.0966	0.654	0.9204	0.575	0.1747	1.3316	0.7009	0.6109	0.8321	0.7708	0.1294	0.416	0.6334	0.5227	0.6223	1.3801	1.3671	1.8227	1.6835	1.1423	2.5116	2.8149	1.7086	1.3113	2.0562	0.8492	0.8656	1.096	2.4067
hippurate	495-69-2	C01586	HMDB0000714	0.6178	3.7238	1.446	1.2352	1.2211	0.774	0.9133	1.3911	1.7045	0.7286	2.0338	0.9435	0.3507	0.4635	0.5415	0.7096	1.9112	0.9886	0.8481	1.5906	0.3382	0.8537	2.4581	1.5355	0.1544	1.2782	1.0114	1.5659	0.615	1.0793
histamine	51-45-6	C00388	HMDB0000870	0.6589	1.3103	0.633	3.1262	2.052	0.979	1.3544	1.0323	0.9158	2.1524	2.3638	0.6319	1.4252	1.0978	0.8745	0.7417	0.5405	0.6781	0.8984	0.8841	1.3769	0.8389	0.5247	1.4153	1.3004	1.9073	0.9728	1.021	0.747	1.6113
histidine	5934-29-2	C00135	HMDB0000177	0.9929	1.0166	1.023	1.0071	1.0086	0.9289	0.9804	0.8868	1.0736	1.37	1.0374	0.888	0.7665	0.9526	1.088	0.8707	0.8236	1.0244	1.1381	1.0163	1.0204	0.8883	0.8587	1.1287	0.9734	1.2036	1.0636	0.9448	0.9199	0.8784
histidine betaine (hercynine)*	534-30-5			0.7175	1.1875	0.5577	1.7204	0.8744	1.478	1.2343	0.8101	0.8153	0.9785	0.559	1.095	1.1605	0.7661	0.9748	1.384	0.5855	0.665	0.8352	1.2928	1.1715	0.9369	0.2797	1.2678	0.6566	1.1504	1.0306	1.2123	1.0215	1.354
homoarginine	156-86-5	C01924	HMDB0000670	0.7536	0.7645	1.642	1.8105	1.509	1.6309	1.3214	1.0345	1.4322	0.848	0.8554	1.2014	1.4824	1.4907	1.2215	0.8096	0.6509	1.0054	0.9946	0.6921	0.8843	1.0482	0.8057	1.2312	1.1836	0.887	0.9441	0.9311	0.7363	0.4486
homocitrulline	1190-49-4	C02427	HMDB0000679	1.7439	0.7278	1.2681	0.7882	0.872	0.7956	1.3564	1.089	0.8159	1.4157	1.0395	1.082	0.8508	1.0329	1.2325	0.6357	0.9062	1.1357	0.9671	1.1068	0.9133	0.7977	0.3184	1.3244	0.7941	1.0735	1.0387	1.8003	0.8991	0.8195
homostachydrine*	1195-94-4	C08283	HMDB0033433	1.1587	0.6641	0.5456	0.6206	0.8226	0.5893	1.0667	1.6123	0.5567	1.2603	1.2948	0.569	0.4313	0.903	5.0641	0.9333	0.7344	1.3043	1.6597	1.2285	2.1422	0.8396	1.1565	1.8035	0.7089	0.4447	1.271	1.3656	1.2005	0.6044
hydantoin-5-propionate	5624-26-0	C05565	HMDB0001212	1	2.1322	0.3728	0.3728	0.9081	0.4112	0.9531	0.3728	0.3728	0.7913	0.6758	0.661	0.6527	0.3728	0.7309	0.5816	2.0295	1.9164	2.7115	3.2846	1.2235	0.843	3.3494	2.5853	2.4043	2.8358	0.8309	1.8475	0.3728	1.8311
hydroquinone beta-D-glucopyranoside	497-76-7	C06186	HMDB29943	1.9027	1.5148	0.952	0.2561	0.9259	1.0735	0.2976	0.3437	0.7251	0.7602	1.4213	1.7715	1.6664	1.0897	1.6171	0.752	1	0.6765	1.513	1.5168	0.2561	0.2561	0.5678	1.4801	1.0345	0.9687	0.2561	1.689	0.6827	0.4471
hydroquinone sulfate	123-31-9	C00530	HMDB0240263	0.9091	1.8639	2.3442	2.3931	2.1597	0.5644	1.4744	2.3852	0.9269	2.0788	2.9537	0.8255	0.5723	0.2466	0.6321	0.2405	1.3781	0.8674	0.6482	0.5529	0.9488	0.3166	1.076	1.3715	0.2405	1.829	1.1778	1.5528	1	0.3246
hydroxy-N6,N6,N6-trimethyllysine*				1.0705	0.9337	0.9408	1.1861	0.9575	0.9494	0.9907	0.717	1.0093	1.2772	0.8742	0.9512	1.4309	0.8181	0.9311	1.1744	0.9769	1.4223	0.9285	1.1318	1.0607	1.2392	0.9473	1.5781	1.0228	1.2724	1.1643	1.0181	0.9513	0.9549
hydroxyasparagine		C20631	HMDB32332	1.3935	1.153	1.1435	1.0511	1.051	1.0071	1.2097	1.2642	1.4582	1.1223	1.1978	0.7816	1.4533	1.2358	0.9055	0.9393	0.8693	1.2471	0.9295	0.7233	0.9216	0.9754	0.9446	0.947	1.0697	0.7651	0.7662	0.8566	0.9929	0.8698
hydroxymethylpyrimidine	73-67-6	C01279		1.8723	1.3643	0.6139	0.5725	1.3427	0.7754	0.8806	1.0139	0.8122	1.4156	0.7712	0.9105	0.86	0.9389	1.2465	0.7814	1.4509	1.6154	1.6638	1.3693	0.9861	0.4591	0.6568	3.0362	0.8875	2.3359	1.42	1.5277	0.5521	1.0674
hydroxypalmitoyl sphingomyelin (d18:1/16:0(OH))				0.9227	0.9993	0.9	1.0007	1.2238	1.1336	1.1104	0.8016	0.9967	1.0041	1.0791	1.1302	0.8656	0.9706	1.0913	0.8702	1.022	1.0422	1.057	0.7769	0.8488	1.1141	1.1186	0.9351	1.0918	0.8933	0.8043	1.068	0.8974	0.7936
hyodeoxycholate	83-49-8	C15517	HMDB0000733	1.6314	1.4778	0.9273	1.9673	0.6532	1.0727	2.9411	1.5751	1.3512	0.3544	0.6284	0.6436	1.2782	1.953	1.9209	0.2421	0.2421	0.2421	0.2421	0.7157	1.1067	0.2421	0.2421	0.2421	0.5898	0.2421	0.7033	0.2421	0.4783	0.4943
hypotaurine	300-84-5	C00519	HMDB0000965	0.586	1.3212	0.76	0.7537	1.3604	0.8042	0.5734	0.7127	0.6765	1.6998	0.9903	0.3957	0.7104	0.9945	1.2163	2.2475	0.7061	0.9839	1.1563	1.1051	1.0055	0.6428	1.0573	1.4281	1.0928	1.5747	1.0814	0.9737	1.1797	1.3974
hypoxanthine	68-94-0	C00262	HMDB0000157	1.2191	1.013	0.7346	1.3717	1.1504	1.4317	1.0609	1.0629	1.1106	2.0317	0.9461	0.4895	0.987	0.6304	0.832	1.3222	0.3812	0.8673	1.1898	0.9549	1.4689	0.7236	1.1967	1.6338	0.7246	1.4243	0.0748	0.8391	0.7979	0.7415
imidazole lactate	14403-45-3	C05568	HMDB0002320	0.4299	1.7176	0.4586	0.2883	0.3155	0.4326	0.4563	0.3463	0.4387	0.315	0.2633	0.2445	0.3897	0.3144	0.36	1.3088	1.2348	1.3794	1.3132	1.3831	1.5314	1.2364	1.8907	1.0903	1.1024	1.4333	0.9842	1.0158	1.0678	1.8097
imidazole propionate	1074-59-5		HMDB0002271	1.3875	1.188	1.0891	4.5222	0.8046	1.8853	3.2064	0.7506	4.1113	0.7752	1.0005	0.6233	3.4383	2.9329	1.2455	0.517	0.6999	0.8342	0.3785	1.2799	1.8344	0.4848	1.3149	0.9995	0.5201	0.6881	2.369	0.4665	0.4629	0.8086
indole-3-carboxylate	771-50-6	C19837	HMDB0003320	1.124	1.1977	1.2789	1.4932	1.316	1.0189	1.0639	0.942	1.8734	1.1082	1.1544	1.2475	1.795	1.1373	1.0489	0.8791	0.7231	0.8156	0.7301	0.8795	0.6995	0.8283	1.0885	0.9735	0.943	0.9805	0.7823	0.9811	0.5311	0.6038
indoleacetate	6505-45-9	C00954	HMDB0000197	1.323	0.8469	1.6957	0.9102	1.3354	1.2696	0.9814	0.9541	1.5857	1.1112	1.2308	1.1885	1.6515	0.829	1.2089	0.6507	0.8131	0.5881	0.9572	1.0711	0.5798	0.3551	1.2097	1.6973	0.5425	1.3562	0.6076	1.0186	0.7598	0.9393
indoleacetylglycine				1.2042	2.5318	1.8829	0.5015	0.9852	0.5587	0.5294	0.8166	1.2872	0.9426	1.0782	0.9922	1.058	0.7317	1.0078	0.7454	1.2807	0.8599	1.1265	1.0315	0.6669	0.3212	1.0825	1.6033	0.9212	1.1041	0.9529	1.1441	0.7364	1.0952
indoleacrylate	1204-06-4		HMDB0000734	1.6035	1.0375	1.2032	1.7091	1.4586	2.5403	1.2803	0.9306	1.5088	1.4072	1.1161	1.7249	1.3361	0.8757	1.3971	0.9345	0.9382	0.9625	0.7571	0.9041	0.9519	0.7088	1.816	0.9534	0.4797	0.6096	0.7535	0.7349	1.1458	0.4182
indolelactate	832-97-3	C02043	HMDB0000671	1.4356	1.3365	1.1588	0.9283	1.2034	0.8787	0.9505	0.7915	1.3637	1.3806	0.8929	1.0932	1.2351	0.7718	1.2514	0.7467	1.1569	1.0495	0.9197	0.9043	0.6125	0.7452	1.3469	1.4881	0.9494	1.4512	0.7654	0.9236	0.518	1.2215
indolepropionate	830-96-6		HMDB0002302	0.7299	1.157	1.1836	1.3266	0.8954	1.1108	1.0127	0.8379	1.6325	1.0971	1.011	0.989	0.9047	0.7396	1.3834	0.9346	1.3768	1.1809	1.1331	0.8072	1.1261	0.9323	1.4645	1.2949	0.4046	0.9302	0.8295	0.837	0.5242	0.6405
indolepropionylglycine				0.6442	2.2223	1.2793	0.9618	0.5824	0.5052	0.6651	0.6891	1.7101	0.8335	0.8644	0.5139	0.596	0.7275	1.2491	1.3151	2.7479	1.6226	1.3643	1.3578	1.8872	2.2929	1.9884	1.7596	0.5848	1.0382	0.8657	0.8669	0.6208	2.1791
indolin-2-one	59-48-3	C12312		1.1957	0.7641	1.4657	1.8564	1.4343	1.4886	1.0897	1.1076	1.4445	1.5073	1.057	0.9536	1.1972	0.9228	1.1885	0.4098	1.0433	0.7828	0.673	0.9567	1.0868	0.646	0.8385	0.9308	0.4028	1.2408	0.4475	0.7987	0.4358	0.702
indoxyl glucuronide	35804-66-1		HMDB0010319	0.5474	3.0998	0.7716	1.1089	0.9105	1.0291	0.9709	0.8463	0.785	0.4721	0.7559	0.5685	0.6928	0.5018	0.619	0.8824	1.9037	1.8996	2.1376	3.134	1.9214	1.058	2.8025	1.7723	0.6809	1.8143	1.4646	1.6769	0.6859	2.6214
inosine	58-63-9	C00294	HMDB0000195	1.4608	0.9382	0.7794	1.6061	1.2727	1.562	0.9735	1.3257	1.4164	1.2642	1.2013	0.6548	1.0127	0.9873	1.1627	0.9146	0.4692	0.6602	1.5658	0.9773	1.6746	0.9702	1.3607	1.3851	1.0822	0.9188	0.1338	0.9469	0.8242	0.8408
inosine 5'-monophosphate (IMP)	4691-65-0	C00130	HMDB0000175	0.0363	3.3706	0.0363	1	0.6984	0.6596	0.0363	0.0363	0.0363	5.4736	0.2522	0.0363	0.0363	0.0363	0.5572	1.2679	0.7367	2.7258	0.5293	1.6851	0.9746	0.2301	0.3495	2.6653	0.5091	4.3697	2.1954	2.6013	1.1819	2.196
isobutyrylcarnitine (C4)	25518-49-4		HMDB0000736	1.162	1.1341	0.6341	1.8613	1.7409	0.8778	1.0953	0.5649	0.7672	1.5591	1.5739	0.6232	1.0268	0.7978	0.9732	0.3688	1.0505	0.7196	0.6646	1.7509	1.237	0.8948	1.493	1.5449	0.4963	2.8057	1.0323	0.5951	0.5294	0.8155
isobutyrylglycine (C4)	15926-18-8		HMDB0000730	0.7932	1.5042	0.908	1.6203	1.0902	0.5366	0.8418	0.5709	0.6528	0.87	0.9732	0.5424	1.0268	0.476	0.7671	0.935	1.6927	1.2834	1.4086	1.5111	1.1701	1.0906	1.9807	1.0439	0.6827	2.0903	1.355	0.7956	0.6791	1.2029
isocaproylglycine				0.9337	1.89	0.4551	0.9644	1.04	0.3307	1.0356	0.5948	0.6825	1.2176	0.7381	0.1658	0.7981	0.3711	0.6227	0.6367	1.8485	1.3509	1.1763	2.313	1.6184	1.555	2.0761	1.8989	0.9021	2.7724	1.1056	0.5849	0.5495	1.8267
isocitrate	20226-99-7	C00451	HMDB0001874	0.6344	1.2243	0.8033	0.908	0.7365	1.3786	1.0239	0.8673	1.4151	0.8444	0.8914	0.6954	1.0033	0.8936	0.9535	1.0569	1.4767	2.9143	1.5126	0.9967	2.021	0.7791	1.9806	2.7708	1.1477	3.2	0.86	0.854	0.6983	1.0243
isocitric lactone	4702-32-3			1.9894	0.6864	1.0064	1.0019	1.0141	1.1891	0.668	0.5465	0.8886	1.492	0.6917	1.3301	1.3195	1.0275	1.3166	0.7865	0.8206	1.0338	0.635	0.9513	0.6933	0.822	1.0876	2.0675	1.1638	1.8492	0.6199	0.7091	0.5406	0.9981
isoleucine	73-32-5	C16424,C00407,C06418	HMDB0000172	1.0488	1.3748	0.9121	1.1864	1.1251	1.0543	0.8906	1.0506	0.9956	1.1568	0.9867	0.942	1.0044	0.9033	1.1288	0.8199	0.9336	1.1736	0.9802	1.11	0.9444	1.12	1.0858	0.9226	0.9512	1.0988	1.2194	0.9696	0.6698	0.9396
isoleucylhydroxyproline*			HMDB0028908	1.0056	1.2095	1.0823	0.7119	0.9942	0.8351	0.9614	0.8969	0.8727	1.4465	1.0549	0.7268	1.1782	1.0663	1.0955	1.1974	0.9651	1.4303	0.7048	0.761	1.1853	1.4618	1.5957	1.042	0.9607	1.2117	0.9944	0.8069	0.8508	0.9506
isovalerate (C5)	503-74-2	C08262	HMDB0000718	0.4696	1.022	1.0688	1.3672	1.2506	1.0283	1.2882	1.2939	1.2777	1.796	3.039	3.0241	2.4983	2.0677	2.0595	2.8696	0.5838	0.4801	0.9455	0.7642	0.6949	0.978	0.6912	0.6692	0.3048	0.968	0.3917	0.4066	0.4811	0.3726
isovalerylcarnitine (C5)	31023-24-2	C20826	HMDB0000688	2.999	1.3537	0.9331	0.4107	0.4107	0.8445	0.4107	1	0.6685	2.5355	2.1989	0.558	1.4078	1.0727	1.5886	0.7285	1.0855	0.4107	0.4107	0.4107	0.4107	0.5511	0.4107	0.4107	0.9979	0.4107	0.7874	1.117	0.8085	1.1404
isovalerylglycine	16284-60-9		HMDB00678	1.773	2.6009	1.0687	0.514	1.3516	0.3001	0.6318	0.6367	0.7157	1.5449	1.0982	0.4329	1.0365	0.731	1.1272	0.5289	1.2266	1.665	0.9431	1.2868	0.6797	0.9184	1.2931	1.5876	0.9231	1.7279	0.9635	0.8701	0.6544	1.2976
itaconate	97-65-4	C00490	HMDB0002092	1.1393	1.2213	0.8805	0.5522	1.0162	0.773	1.0538	0.6762	0.9279	1.245	1.4744	1.894	2.1291	1.0548	2.8102	4.7103	0.7827	1.2171	0.6594	0.9364	2.3188	0.7804	0.7303	0.9838	1.7979	1.1011	0.884	0.8747	0.757	0.9643
kynurenate	492-27-3	C01717	HMDB0000715	0.7356	2.0487	0.5132	0.4003	0.9054	0.5904	0.6268	0.9535	0.8109	1.1779	1.4704	1.3177	0.9057	0.3234	0.5871	0.7272	1.7575	1.346	1.3392	1.3366	0.4758	1.2335	2.3608	1.8222	0.6804	2.9295	1.0465	1.0657	0.3247	2.3615
kynurenine	2922-83-0	C00328	HMDB0000684	0.9749	0.9132	1.2157	1.3547	1.5482	1.0907	1.2169	2.0141	1.5298	1.3259	1.8542	1.5379	1.0737	0.7955	0.9485	0.9845	0.8727	0.7945	0.9426	0.9983	0.7928	0.8543	0.9397	1.1073	0.9589	1.1427	0.5335	1.0592	0.6089	1.0017
lactate	79-33-4	C00186	HMDB0000190	1.1697	1.0881	1.0148	0.7687	0.9968	0.8858	0.8209	0.9483	0.9621	1.342	0.9625	0.9815	0.9931	0.9555	1.0091	1.0956	1.0277	1.1621	1.2399	1.0775	0.9277	0.8706	1.1443	1.3663	0.9156	1.2599	1.0032	0.9373	0.7976	1.0556
lactosyl-N-palmitoyl-sphingosine (d18:1/16:0)	4201-62-1			0.8269	2.5884	0.7301	0.5093	0.9149	0.373	0.8742	0.4122	0.7909	0.956	0.4656	0.5577	0.6053	0.6708	0.9127	0.716	2.2104	1.8332	1.4849	2.2383	1.044	2.2215	2.1865	1.6957	1.4121	1.7875	1.763	1.7049	1.6663	3.154
laurate (12:0)	143-07-7	C02679	HMDB0000638	0.5849	0.9209	0.6117	2.3977	1.0495	2.29	2.3609	1.4968	1.9172	0.7121	0.7966	0.5227	0.7503	1.0179	0.5239	1.0174	1.2213	1.3195	0.64	0.8555	1.917	2.2284	1.8458	0.6299	0.8452	0.9512	1.0126	0.5315	0.9874	1.1975
laurylcarnitine (C12)	25518-54-1		HMDB000225	0.5503	1.0814	0.9998	2.5976	1.2772	1.9288	3.1561	0.9114	1.7122	0.9844	0.7876	0.805	0.8591	1.7855	0.4778	1.3896	0.9657	1.094	0.4338	1.0055	1.8858	2.3362	1.5295	0.5913	0.8046	0.9023	1.0002	0.4334	0.7979	1.7676
leucine	61-90-5	C00123	HMDB0000687	1.1127	1.2162	0.9696	1.0259	1.1499	1.0845	0.8784	0.9744	0.9472	1.2486	1.0004	0.9845	0.9289	0.994	1.1907	0.8094	0.9689	1.1655	1.0389	1.0885	0.9842	0.9996	0.9595	1.0831	0.9934	1.0974	1.1583	1.1063	0.7276	0.9474
lignoceroyl sphingomyelin (d18:1/24:0)	60037-60-7			0.8759	1.4444	0.9017	1.1492	0.7978	0.9068	0.8417	0.6194	0.8784	0.8873	0.6944	0.9352	0.7644	0.8743	0.9053	1.1366	1.3431	1.3886	1.0274	1.5195	1.0806	1.5904	1.5481	1.0205	1.0307	1.2191	1.0221	0.9795	0.9007	1.7844
lignoceroylcarnitine (C24)*				0.4685	0.9594	0.8138	1.0039	0.7622	0.8739	1.026	0.6319	0.7181	0.9961	0.8744	0.7512	0.5545	0.874	0.8239	1.1201	1.3895	1.3486	1.2327	1.5133	1.3441	1.5887	1.6249	1.3831	0.9075	1.3279	1.4097	1.3228	0.9465	1.4209
linoleamide (18:2n6)	3999-01-07		HMDB0062656	2.129	1.087	0.6279	1.1799	1.1476	1.0202	0.8458	0.8726	1.8211	1.4508	1.0052	0.7437	0.8301	1.5725	0.8646	1.2564	0.6141	0.4083	2.0632	0.9701	0.671	0.5412	1.0273	1.2642	0.7551	0.4083	1.4486	0.8522	1	0.687
linoleate (18:2n6)	60-33-3	C01595	HMDB0000673,HMDB0006270	0.8006	1.1478	1.0602	2.2245	1.041	1.7891	2.2322	1.4562	1.779	1.2638	0.9285	0.5838	1.4898	1.3596	0.677	0.9442	1.0061	0.9939	0.6088	0.8443	2.4238	1.9318	1.5554	0.6324	0.9132	0.4993	0.8102	0.6782	0.8712	0.9604
linolenate (18:3n3 or 3n6)		C06426,C06427	HMDB0001388,HMDB0003073	0.6918	1.1134	0.7641	2.0713	0.9945	1.9291	2.6348	1.3051	1.8209	1.0351	0.804	0.6002	1.2227	1.2756	0.6725	0.7437	1.0055	1.0803	0.5319	0.6305	2.2548	1.8083	1.6826	0.5061	0.9165	0.4416	0.7581	0.6303	0.8685	1.0565
linolenoylcarnitine (C18:3)*				0.5766	1.1208	0.9283	2.8914	1.2286	1.8431	2.6824	1.0185	1.8065	0.9815	0.9091	0.9506	0.9069	2.1682	0.6753	1.0575	0.8525	1.2632	0.4898	0.8798	2.2523	1.9252	1.473	0.7151	0.836	0.8676	1.0254	0.4705	0.7107	1.7011
linoleoyl ethanolamide	68171-52-8		HMDB0012252	0.6155	0.7931	1.1424	1.9883	1.4581	1.7906	2.0761	1.5203	1.6476	1.0184	1.0294	0.9694	0.7239	0.7141	0.5784	0.8879	1.0168	0.9832	0.5012	1.0316	1.7806	1.2507	1.6499	0.9735	0.8763	1.2827	0.4873	0.694	0.8272	0.9662
linoleoyl-arachidonoyl-glycerol (18:2/20:4) [1]*			HMDB0007257	1.0056	1.4872	0.8954	0.9704	0.8591	0.7764	0.7815	0.7169	0.6169	1.1032	0.8707	0.6111	1.0743	0.7241	0.9944	0.993	1.5715	1.1653	1.2896	1.0239	0.9124	1.201	1.7915	1.0845	1.4093	0.6908	1.2624	1.0659	0.9216	1.2678
linoleoyl-arachidonoyl-glycerol (18:2/20:4) [2]*			HMDB0007257	0.9835	1.442	0.936	0.9909	0.6656	0.6798	0.7561	0.5377	0.5547	1.2393	0.7565	0.6577	1.2088	0.6581	0.918	1.2221	1.3068	1.2579	1.2419	1.0369	0.8101	1.2324	1.6556	1.2404	1.3359	1.0047	1.0487	0.9953	0.8942	1.2941
linoleoyl-docosahexaenoyl-glycerol (18:2/22:6) [1]*			HMDB0007266	0.7115	1.536	1.9057	1.537	0.7186	1.4161	0.9436	0.8922	0.8611	0.9095	1.0564	1.0791	1.9507	0.5375	0.8665	1.4472	1.0851	0.9205	0.7908	0.8891	1.3773	1.7945	1.764	0.5415	1.1387	0.4377	2.374	0.6771	0.5114	1.1937
linoleoyl-docosahexaenoyl-glycerol (18:2/22:6) [2]*			HMDB0007266	0.8254	1.3393	1.8627	2.14	0.9926	1.3613	0.955	0.904	0.9572	1.5586	1.2026	0.9772	2.1947	0.9996	0.8208	1.3123	1.0501	0.8796	1.0328	0.938	1.5599	1.7368	1.3889	0.8277	1.0004	0.896	1.8987	0.6168	0.6317	0.8405
linoleoyl-linolenoyl-glycerol (18:2/18:3) [1]*			HMDB0007249	1.7415	1.2693	1.1181	0.4362	1.7351	1.5148	1.0255	0.7243	0.9725	1.2389	0.8151	1.1011	1.3341	0.7489	2.0595	0.7228	1.5589	0.666	0.9745	0.688	0.6643	0.8658	1.6127	0.5324	0.9017	0.4876	1.4256	2.2667	0.4428	1.1568
linoleoyl-linolenoyl-glycerol (18:2/18:3) [2]*			HMDB0007250	1.6478	1.5124	1.1384	0.8432	1.5641	1.2755	1.0663	0.7263	1.0125	1.2659	0.7662	0.8912	1.3974	1.1449	1.7045	0.644	1.1064	0.6702	0.9875	0.8213	0.8637	1.0539	1.5308	0.679	0.9815	0.9426	0.815	1.5818	0.5739	0.8818
linoleoyl-linoleoyl-glycerol (18:2/18:2) [1]*			HMDB0007248	1.081	1.5046	1.0617	0.7605	1.0013	1.0578	0.8907	0.7283	0.8418	0.855	0.679	0.7472	1.1648	0.6903	1.1367	0.7988	1.3752	0.7067	1.0676	0.943	0.9987	1.2051	1.7773	0.6108	1.0262	0.5226	1.422	1.2449	0.5431	1.071
linoleoylcarnitine (C18:2)*	36816-10-1		HMDB0006469	0.4864	1.1454	0.791	2.7799	1.2981	1.6714	2.4406	1.0149	1.5075	0.8471	0.9851	1.0948	1.1338	1.516	0.5455	1.0327	0.7214	0.9473	0.4473	0.849	1.981	1.7628	1.3552	0.6307	0.7991	0.757	0.9209	0.5025	0.5939	1.2598
linoleoylcholine*			HMDB0013213	0.4999	0.4999	0.524	0.9526	1.5756	0.4999	0.5819	1.3877	0.4999	0.4999	1.0474	0.4999	0.4999	0.7413	0.4999	0.7916	1.1017	0.4999	0.8714	1.2193	0.8602	1.0753	1.3669	0.4999	1.1867	0.4999	0.8499	1.6326	2.4529	0.8451
lysine	56-87-1	C00047,C00739	HMDB0003405	1.027	0.8216	1.3584	1.0714	1.0942	1.2937	1.0381	0.8767	1.0682	0.9652	0.8963	1.2847	1.1418	1.0743	1.009	1.0393	0.7563	0.9168	1.1995	0.991	0.9062	0.9026	0.9274	1.2429	0.8701	1.0592	0.8295	0.8401	0.8037	0.6279
malate	6915-15-7	C00497,C00149,C00711	HMDB0000744,HMDB0031518,HMDB0000156	0.6737	1.1251	0.6503	0.7937	0.892	1.5303	0.7102	0.6539	0.7944	1.4461	0.7581	0.8584	1.1096	0.7766	1.1437	1.2347	1.0065	1.9952	1.0392	0.9476	1.3865	0.5857	0.8648	1.4812	0.9935	1.9003	1.4779	1.036	0.7691	1.0557
maleate	110-16-7	C01384	HMDB0000176	1.5617	1.0132	0.7405	0.9265	0.9919	1.6572	0.8882	1.2024	1.1941	1.0361	0.9071	0.9946	1.6168	1.0054	2.1307	0.6246	1.1481	1.2391	0.921	1.2635	1.5795	0.7725	0.9382	1.4516	0.8046	1.7547	0.95	0.8824	0.7923	0.722
malonate	141-82-2;26522-22-85-0	C00383	HMDB0000691	1.2054	1.0607	1.0661	0.7574	0.7456	0.8945	0.9659	1.0028	1.1718	0.7536	1.1263	1.303	1.2186	1.053	1.1698	0.7828	1.1004	1.0546	0.7379	0.8676	0.7641	1.1943	0.8874	0.8888	0.952	1.158	1.1306	0.9972	0.9299	0.8303
malonylcarnitine	853728-01-5		HMDB0002095	0.8331	1.3491	0.6986	1.0538	0.9494	1.3679	0.9566	0.8309	0.7205	1.7823	0.796	0.3909	1.1183	0.7978	0.811	2.2253	0.7333	1.1227	1.4289	1.4323	1.149	0.6142	0.7559	1.6198	0.7585	1.3049	1.0675	1.0434	0.8488	1.2734
mannitol/sorbitol		C00392,C00794	HMDB0000247,HMDB0000765	0.9942	1.026	1.1252	0.7412	0.9297	1.0845	1.0058	0.7973	1.0487	1.4013	0.8151	0.7949	0.9002	0.545	10.8707	1.3601	0.9671	1.2562	1.0616	0.8826	1.2049	0.9418	1.3097	1.4519	0.8091	1.3987	0.8848	0.712	0.498	1.2141
mannonate*	642-99-9			0.0368	0.0368	0.0368	0.65	1.2708	0.98	1.0606	0.0368	0.1141	0.0368	0.0368	0.769	1.4418	0.0368	1.0187	0.0368	0.0368	1.2874	0.944	0.0368	1.1274	1.0858	0.0418	0.9689	1.3654	0.0368	1.1459	0.9813	0.7115	1.567
mannose	3458-28-4	C00159,C02209,C00936	HMDB0000169	0.5055	1.2133	0.6592	1.3139	0.5564	1.1139	1.285	1.5012	1.0446	0.7053	0.5603	0.5202	0.8394	1.0224	0.3312	0.7387	1.2158	1.2481	0.8988	0.9776	1.1775	1.8199	1.5863	0.8088	1.0312	0.6275	1.6534	0.6876	0.58	1.1548
margarate (17:0)	506-12-7		HMDB0002259	0.962	1.1388	1.044	1.2497	1.0103	1.0855	1.5531	1.1082	1.259	1.185	0.9246	0.8338	1.0833	1.4222	1.1039	0.8623	0.9818	0.8779	0.8763	0.7277	1.408	0.9948	1.0432	0.7115	1.0052	0.714	0.802	0.8377	0.9069	0.9025
margaroylcarnitine (C17)*	106182-29-0		HMDB0006210	1.0819	1.1398	1.0019	1.6091	1.0951	1.1947	1.5278	0.8898	1.3144	1.0731	0.9347	1.0959	1.1425	1.8982	1.0476	0.8787	0.8972	0.7416	0.732	0.8663	1.3615	1.3056	0.9905	0.7532	0.9655	0.8045	0.8985	0.7586	0.6634	0.9981
mead acid (20:3n9)	20590-32-3		HMDB0010378	1.0586	1.2598	1.6511	1.5538	1.0191	1.3709	1.5207	1.105	1.5424	1.1327	0.7462	0.5548	1.5249	1.0224	0.6561	0.8517	0.5237	0.7651	0.7463	0.6492	1.1763	0.8081	0.9809	0.798	1.1778	0.4128	0.5983	0.7009	1.2644	0.8459
methionine	63-68-3	C00073	HMDB0000696	1.2107	0.6217	1.0788	0.6125	1.0908	1.1037	0.8223	0.5955	0.7879	1.299	0.97	1.348	1.0888	1.0805	1.8231	0.9256	0.8383	0.9056	1.257	1.0303	0.7462	0.4842	0.8337	1.3076	1.0541	1.03	0.6555	1.1704	0.8071	0.6368
methionine sulfone	820-10-0		HMDB0062174	1.411	0.6429	1.2444	0.9953	1.1629	1.1127	1.2053	1.071	1.0916	1.453	1.1496	1.2329	1.028	1.0038	1.7997	0.5143	0.7768	0.7045	1.2207	0.7498	0.668	0.4671	0.4302	0.9962	0.6759	0.5931	0.618	1.1188	0.801	0.5828
methionine sulfoxide	3226-65-1	C02989	HMDB0002005	1.5978	0.7711	0.8964	0.5028	1.2679	1.0109	0.9291	0.6284	0.7768	1.6308	1.0444	1.296	1.024	1.2002	2.1127	0.9466	0.9825	0.9891	1.5111	1.3749	0.6944	0.4459	0.7063	1.7027	1.0279	1.4956	0.5574	1.7452	0.869	0.7544
methyl glucopyranoside (alpha + beta)			HMDB0029965	1.1345	0.9346	0.7346	1.2121	0.7983	0.8852	0.9875	1.5255	0.5904	0.9616	0.992	0.9075	0.6978	0.7337	2.4381	0.9632	1.1033	1.0579	1.238	1.3589	3.0389	1.0103	1.3691	1.166	0.766	0.5933	1.5219	1.1425	0.7097	1.008
methyl indole-3-acetate	1912-33-0		HMDB0029738	2.4554	1.1838	1.0381	0.5143	1.3563	0.7699	1.0414	1.2993	0.4266	2.5897	1.5593	1.7046	1.3134	0.4266	0.9619	0.8989	0.5846	0.4701	0.6839	0.5616	0.4266	0.4266	0.5129	1.2585	0.8056	0.7163	0.5724	1.202	1.1996	0.4266
methyl-4-hydroxybenzoate sulfate			HMDB0041646	3.4263	0.3696	1.514	0.4561	1.8711	228.978	0.7684	0.7093	1.142	1.3008	1.2842	2.8062	1	0.9776	2.1476	0.3696	0.5886	0.3696	0.3696	0.3696	0.3696	0.3696	0.3696	0.7632	0.471	0.8346	0.3696	1.3347	0.4024	0.3696
methylmalonate (MMA)	516-05-2	C02170	HMDB0000202	1.3532	0.9368	0.8011	0.5778	1.5594	2.1044	1.5223	0.7172	0.7276	1.7252	0.8277	0.8019	1.1995	0.64	1.3723	0.9251	0.9832	0.799	1.8357	1.336	1.0907	0.5992	1.0181	2.0896	0.9946	1.7024	0.951	1.0054	0.5613	1.0333
methylphosphate	7023-27-0		HMDB61711	0.8366	0.9462	0.8294	1.3369	1.0794	0.9719	1.1797	0.8023	0.9042	2.1412	1.088	0.6208	1.3479	0.961	1.2101	0.9138	0.9098	1.0175	0.8394	0.7873	0.9857	0.8601	1.1226	1.6491	1.0427	1.1432	0.8015	1.1594	1.0143	1.0559
methylsuccinate	498-21-5		HMDB0001844	1.4987	1.26	0.8045	1.1954	1.6523	1.2264	0.9539	0.7585	1.8977	1.1611	0.9999	0.7162	1.0642	0.5692	1.0001	0.5435	1.1044	0.832	0.7675	0.7681	1.0168	0.7659	1.3988	1.2167	0.5663	1.0973	1.0544	0.6654	0.3248	0.9095
mevalonate	96949-03-0	C02104	HMDB0000227	1.2976	1.1412	1.3957	1.3255	0.882	1.1794	1.4309	1.2859	1.0357	0.704	1.0743	1.1328	0.9454	0.9491	0.8035	0.8588	1.1548	1.2807	0.9643	1.0481	0.8931	1.0741	1.1326	0.9233	0.886	0.8877	0.8465	0.8115	0.7821	0.9553
mevalonolactone	674-26-0		HMDB0006024	0.8975	0.9948	1.5345	0.9832	0.7799	0.63	2.8627	1	1.0707	0.5681	2.2892	1.0833	0.5681	0.662	1.6649	0.7312	1.3417	0.7943	0.6675	1.3958	2.1483	3.2609	1.4225	0.6608	0.5681	0.7219	1.1073	0.5681	0.6772	2.2426
myo-inositol	87-89-8	C00137	HMDB0000211	1	1.3836	0.7215	0.8956	1.2464	1	0.825	0.7454	0.8906	1.7958	0.9648	0.6753	1.2129	0.8703	0.9541	1.4174	0.874	1.4806	1.0618	1.0483	0.8297	0.6962	0.7072	1.5904	1.0638	1.7243	1.2097	1.17	0.7726	1.1266
myristate (14:0)	544-63-8	C06424	HMDB0000806	0.5812	0.9962	0.6932	2.7442	1.0346	2.3916	3.3388	1.3883	2.7286	0.6979	0.8291	0.417	0.7746	1.3142	0.4959	0.9037	1.0444	1.239	0.4969	0.6534	2.5303	2.9161	2.746	0.403	1.0038	0.4163	0.8827	0.4037	1.1512	1.2402
myristoleate (14:1n5)	544-64-9	C08322	HMDB0002000	0.1967	1.2426	0.4106	4.4563	1.1863	3.6742	1.9928	0.9631	1.4282	0.311	0.4689	0.6	0.7866	0.5705	0.3248	1.6044	1.2565	1.6561	0.4405	0.3621	2.7093	2.292	1.6299	0.5328	1.0335	0.7586	1.4896	0.2748	1.4595	0.9665
myristoleoylcarnitine (C14:1)*	889848-55-9		HMDB0240588	0.4268	1.0718	1.067	2.8129	1.2317	1.8459	2.981	1.0781	2.0588	0.597	0.949	0.9765	0.7976	2.1453	0.4112	1.1989	0.6907	1.0128	0.3965	0.7556	1.9382	2.1948	1.4954	0.436	0.7098	0.5697	0.9872	0.3537	0.6971	1.7271
myristoylcarnitine (C14)	18822-89-4		HMDB000506	0.5633	1.353	1.0171	2.0933	1.1308	1.5244	2.3859	0.9536	1.5972	1.1411	0.9907	0.9422	1.0093	1.4532	0.5237	1.218	0.8084	0.9821	0.4701	0.9181	1.4997	1.8753	1.5236	0.5845	0.803	0.7474	0.95	0.4566	0.7084	1.5849
N,N,N-trimethyl-5-aminovalerate				0.7905	0.7794	1.0261	2.9584	1.4878	3.0391	1.1518	1.1218	1.0602	1.8503	1.5868	2.3177	1.282	0.9416	0.6455	1.0672	0.5845	0.6899	0.8421	1.1093	0.7332	1.0404	0.9197	0.8886	1.4911	0.9739	0.6865	0.6804	0.7591	0.8832
N,N,N-trimethyl-alanylproline betaine (TMAP)			HMDB0240365	0.8545	1.0477	1.339	2.2871	0.841	1.0262	0.8066	0.7339	0.7862	3.0903	0.8855	0.648	1.3409	0.7575	1.0238	1.07	0.6431	1.0027	0.8193	0.9973	0.9652	0.629	0.684	1.4247	0.9881	1.5565	1.03	1.0103	1.0465	1.4227
N,N-dimethylalanine	2812-31-9			1.3495	0.6843	1.1169	0.6738	0.4341	0.669	0.8527	1.2992	1.3012	0.8789	0.8352	1.312	1.6209	1.4878	1.6649	1.2138	0.5676	0.9732	0.6176	0.7331	2.0858	0.9993	1.0957	0.8898	1.0007	1.5957	1.9525	0.549	1.1673	0.7814
N-(2-furoyl)glycine	5657-19-2;5657-19-2		HMDB0000439	2.4199	2.8464	1.1128	0.077	1.265	0.6322	0.1853	0.9431	1.0569	0.8798	2.0698	1.6176	0.8798	0.4867	0.8149	1.7968	1.9366	1.1387	1.1137	1.5339	0.1368	0.2018	0.7221	1.9109	0.4007	1.6233	0.3249	1.495	0.2652	0.4197
N-acetyl-1-methylhistidine*				1.0906	1.3775	0.7395	0.5036	0.7031	0.6962	0.4213	0.4213	1.0123	0.8155	0.9733	0.8273	1.135	0.5019	0.8704	1.0609	1.0625	1.2267	1.089	1.3808	0.7972	1.5763	0.829	1	1.3557	1.2778	0.9876	1.0427	0.9154	1.8005
N-acetyl-2-aminooctanoate*			HMDB0059745	0.6164	1.9253	0.7858	0.7587	0.335	0.6156	0.5717	0.4295	0.6543	0.4994	0.4519	0.5362	0.725	0.687	0.5311	1.4108	1.1956	1.8831	1.0187	0.9813	1.508	1.6557	1.2636	1.2885	2.1441	1.5814	1.8885	1.2025	1.5556	1.9847
N-acetyl-3-methylhistidine*	37841-04-6			1.1885	1.2031	0.97	0.9214	1.0744	0.8666	1.0121	1.1519	1.119	1.5524	1.245	0.659	0.8265	0.5516	0.8148	0.4671	0.8559	1.0287	1.2012	0.4964	1.358	0.6284	0.7085	1.0481	1.3064	1.4291	0.8061	0.9879	0.7885	1.2994
N-acetyl-aspartyl-glutamate (NAAG)	3106-85-2	C12270	HMDB0001067	0.4825	9.2677	0.6044	4.0622	2.3854	0.8679	2.1346	0.6727	2.5749	2.8229	0.7143	0.203	3.5573	0.6637	1.5536	1.8554	0.4539	0.834	0.6333	1.0244	0.6031	0.3184	0.9756	1.0302	2.0057	5.5338	0.9658	1.6995	2.6908	0.6846
N-acetyl-beta-alanine	3025-95-4	C01073	HMDB0061880	0.9074	0.9356	1.4958	1.4047	1.0498	0.9186	0.5089	0.7587	1.0641	1.6467	1.0316	0.7611	1.245	1.2221	1.2483	1.2787	0.6689	0.714	0.7682	0.5058	0.9684	1.5797	0.4454	0.7167	1.2746	0.7624	1.3345	0.5012	1.2279	1.1342
N-acetyl-isoputreanine				1.2769	0.5738	0.8024	0.5738	1.4279	0.5738	0.6148	0.5738	1.597	1.7728	1.4067	1.163	1.3651	1.0609	0.7951	0.5738	0.5738	0.5738	0.5738	0.5738	0.5738	0.8427	0.5738	0.5738	0.663	0.9391	0.668	0.5738	0.5738	0.5738
N-acetylalanine	97-69-8	C02847	HMDB0000766	0.9087	1.4573	1.2001	1.0948	1.073	0.8991	0.8109	1.0189	0.868	1.1739	0.958	0.9988	1.006	0.7915	1.0012	0.8524	0.9546	1.4566	1.0551	0.9046	0.9071	1.2468	0.9919	1.2305	0.9868	1.3977	1.086	0.8427	0.6883	1.0634
N-acetylarginine	155-84-0	C02562	HMDB0004620	0.7568	1.3568	0.713	0.6655	0.9243	0.6211	0.8445	0.6775	0.6949	0.9114	0.7838	0.9899	0.6607	0.9443	0.9223	1.0101	1.1349	1.3076	1.658	1.3709	1.1481	1.0682	1.1098	1.3037	1.2201	1.8505	1.0105	1.3832	0.8744	1.1468
N-acetylasparagine	4033-40-3		HMDB0006028	0.9401	1.7727	0.7767	0.8059	1.0519	0.6895	0.9057	0.8573	0.8464	1.1704	0.7547	0.7352	0.7815	0.702	0.7772	0.8637	1.3691	1.4969	1.8881	1.5336	1.4002	0.9481	1.1461	1.8771	1.2552	2.7432	1.0636	1.1359	0.6952	1.5529
N-acetylaspartate (NAA)	997-55-7;997-55-7	C01042	HMDB0000812	0.7615	6.6868	0.7567	2.7109	2.0714	0.8239	1.2603	0.5658	1.9054	1.8659	0.6155	0.5872	2.7137	0.8427	1.2984	1.546	0.6521	0.9892	0.6966	0.8726	0.6521	0.6081	0.8904	1.2058	1.5978	5.0159	1.0108	1.248	1.8566	0.893
N-acetylcarnosine	56353-15-2		HMDB0012881	1.0176	1.6832	0.5445	0.469	0.5725	0.469	0.469	0.469	0.7463	1.2145	0.469	0.6041	0.5728	0.577	0.6461	1.4065	0.6292	2.0014	0.7109	1.2459	1.0388	2.0269	1.655	1.5934	1.8456	1.8079	0.9448	0.9756	0.9824	1.1769
N-acetylcitrulline	33965-42-3	C15532,C02851	HMDB0000856	1.4106	1.7654	0.8824	0.7281	1.2237	0.5996	0.9909	0.6639	1.1227	1.8016	1.1669	0.6876	1.0091	0.8734	0.8775	0.8501	1.3417	1.0566	1.6266	1.894	0.8556	0.7527	0.8525	2.0452	1.2654	2.1782	0.7649	1.3699	0.7195	0.9523
N-acetylglucosamine/N-acetylgalactosamine		C01074	HMDB0000212,HMDB0000215	0.9807	1.0207	0.9122	0.6806	1.036	0.9866	1.1291	0.963	0.8699	1.103	1.0725	0.9924	1.0477	0.8448	0.6806	0.9963	1	1.2273	1.0343	0.9557	1.0242	1.3323	1.1182	1.1789	0.8367	1.2642	1.0537	0.8819	0.7307	0.9716
N-acetylglucosaminylasparagine	2776-93-4	C04540	HMDB0000489	0.9909	1.512	0.6721	1.225	1.1944	1.3168	1.0424	1	0.9874	1.9735	0.9956	0.6455	1.3067	0.8269	0.7755	1.433	0.5313	1.3476	0.8303	1.0595	1.0476	0.786	0.5313	1.3417	0.94	1.2721	1.0447	0.9256	0.7129	0.8337
N-acetylglutamate	5817-08-03	C00624	HMDB0001138	1.6402	1.2817	0.5266	0.6231	1.0024	0.9976	0.6741	0.5388	0.6086	1.3539	0.7371	0.766	0.959	0.8783	1.0746	0.9817	1.288	1.2821	1.9715	2.0317	0.6582	0.5708	1.3274	2.7913	1.1885	2.7573	0.6094	1.7266	0.5986	1.219
N-acetylglutamine	2490-97-3	C02716	HMDB0006029	0.7082	1.6913	0.6123	0.3392	0.4628	0.4961	0.5228	0.4303	0.4311	0.6671	0.4814	0.4996	0.6904	0.5905	0.5972	2.0858	1.4205	1.5055	2.081	1.6715	1.6508	1.2396	1.2851	1.537	1.4241	1.8821	1.0465	1.2507	0.9535	1.346
N-acetylglycine	543-24-8		HMDB0000532	0.6437	1.4334	0.7998	1.8242	0.5842	0.6617	1.084	0.9904	0.8482	0.8565	0.6636	1.4582	1.2019	0.7555	0.7926	1.0156	1.0531	1.6232	1.032	0.9458	1.1754	2.0331	0.9899	1.0101	1.0096	1.3969	0.9485	0.6768	0.742	1.2909
N-acetylhistidine	39145-52-3	C02997	HMDB0032055	1.2341	1.2533	0.9562	0.4767	0.8547	0.6066	0.9142	0.6156	0.7687	1.002	0.8974	0.793	0.939	0.8242	0.9539	0.919	1.2046	1.1434	1.7722	1.2881	1.4816	1.0351	1.1379	1.4553	1.4462	1.4199	0.998	1.3254	0.6531	1.3578
N-acetylisoleucine	3077-46-1		HMDB0061684	0.9784	2.761	0.9887	0.6926	1.169	0.7832	0.8674	0.8678	0.8248	1.2795	0.9851	1.0275	0.9566	0.6744	0.8882	0.7984	0.995	1.6795	1.3178	1.243	1.005	1.6443	1.3303	1.3603	1.1155	2.1283	1.5248	0.9783	0.5343	1.0911
N-acetylkynurenine (2)				0.9021	1.1191	1.1799	1.2826	0.9296	0.8021	0.906	1.5193	1.1902	1.0129	1.3053	1.3057	0.9871	0.5954	0.8492	0.8025	1.1988	0.8856	1.0286	0.9095	0.8698	1.1439	1.1176	0.9218	0.9422	1.5518	0.6732	1.0525	0.552	1.3555
N-acetylleucine	1188-21-2	C02710	HMDB0011756	1.0224	2.0011	0.7579	0.4239	1.0022	0.6924	0.6239	0.6875	0.6702	1.1441	0.7941	0.7859	0.6781	0.6267	0.8516	0.6596	1.0949	1.7571	1.3581	1.4189	0.9561	1.2914	0.9978	1.5275	1.0605	2.0628	1.3688	1.1726	0.4462	1.0527
N-acetylmethionine	65-82-7	C02712	HMDB0011745	1.0449	1.3246	1.0911	0.5411	0.9308	0.7034	0.7017	0.7203	0.6678	1.0346	0.772	1.0013	0.842	0.8228	0.9444	1.0424	1.1881	1.5339	1.484	1.2219	0.8694	1.0018	1.0991	1.364	0.9987	1.5549	0.9675	0.9525	0.5816	1.1837
N-acetylmethionine sulfoxide	108646-71-5			1.2216	1.2252	1.0094	0.628	1.0038	0.7425	0.9417	0.7129	0.6773	1.2343	0.8117	0.8834	0.7933	0.8631	1.0275	1.261	0.9962	1.4214	1.4845	1.247	0.9634	1.0348	0.8521	1.4426	0.7387	2.0011	0.66	1.1221	0.6068	1.3575
N-acetylneuraminate	131-48-6	C00270	HMDB0000230	1.0901	1.1426	0.9721	1.272	1.1741	1.059	0.946	0.7636	0.9673	2.0824	0.9314	0.7896	1.2984	0.8974	0.9552	1.1182	0.9518	1.1339	0.8108	1.0305	0.9249	0.9836	0.8604	1.247	1.0164	1.2696	1.0351	0.9455	0.8486	1.1573
N-acetylphenylalanine	2018-61-3	C03519	HMDB0000512	1.3617	1.0811	1.0589	0.8026	1.3212	1.0636	0.8659	1.0089	1.0493	1.3808	1.2776	1.1202	1.046	0.9245	1.2472	0.4986	0.7935	0.9911	0.8107	0.8156	0.9287	0.8312	0.5428	0.8303	1.1803	1.2544	0.8703	1.0189	0.5062	0.632
N-acetylproline	1074-79-9		HMDB0094701	1.8176	0.7593	0.3903	0.3208	0.7393	1.038	0.9006	0.6034	0.4742	1.5559	1	1.6636	1.2521	1.0818	2.1507	1.4677	1.0806	1.2611	1.3474	0.6942	0.3208	0.546	0.4425	1.2815	0.9632	1.883	0.6082	1.3174	0.774	0.5638
N-acetylputrescine	18233-70-0	C02714	HMDB0002064	1.0806	0.9191	1.012	1.0016	1.0743	0.7444	1.0599	0.9056	0.9079	1.1259	1.2056	0.9666	1.0089	1.0169	1.4056	0.9569	0.9424	1.4776	0.9357	0.7761	0.9401	0.9212	0.9913	1.5507	1.0948	1.2952	0.9984	0.9956	1.6305	0.8519
N-acetylpyrraline		C01227		1.8671	0.7889	0.843	0.2845	1.5881	0.6575	0.8727	0.7153	0.5828	1.5785	1.321	1.0708	0.7466	0.661	1.0465	1.0995	1.4289	1.5211	1.4627	1.7658	0.7264	0.3326	0.287	2.5472	0.9535	3.0937	1.2104	2.4596	0.4993	0.5548
N-acetylserine	97-14-3		HMDB0002931	0.808	1.7869	0.8531	0.6343	0.9	0.6579	0.6943	0.6754	0.7463	0.9889	0.7351	0.7997	0.7861	0.7036	0.8448	1.0111	1.3035	1.5077	1.9115	1.7332	1.0888	1.3199	1.2476	2.1041	1.3028	2.2916	1.0908	1.1701	0.7444	1.3721
N-acetyltaurine			HMDB0240253	1.1203	1.8719	1.1109	0.9617	1.1195	0.944	1.0966	0.8223	0.9865	2.2106	0.9749	0.772	0.9776	0.6388	0.6583	1.4464	1.5104	1.5491	1.0135	1.3313	0.663	0.98	1.4251	1.8053	0.671	2.5821	0.6923	0.9751	0.5827	1.6906
N-acetylthreonine	17093-74-2		HMDB0062557	0.9485	1.8062	0.9426	0.7029	0.8634	0.6838	0.6488	0.714	0.6936	1.2217	0.7619	0.8142	0.997	0.7215	0.8409	1.1003	1.1955	1.2105	1.3589	1.2618	0.831	1.2113	1.3241	1.5245	1.049	1.8228	1.003	1.0757	0.626	1.4912
N-acetyltryptophan	1218-34-4	C03137	HMDB0013713	0.7252	1.6238	0.8192	0.6292	0.7196	0.6417	0.9189	0.7221	0.8423	0.9895	0.8214	1.0215	0.7916	0.4986	0.7452	0.8231	1.3171	1.2718	1.3761	1.3831	1.2597	1.2479	1.6388	1.2884	1.3399	2.015	1.2132	1.0105	0.5463	1.5466
N-acetyltyrosine	537-55-3		HMDB0000866	1.0972	0.9028	0.8919	0.6477	1.4697	1.5176	1.1227	0.6681	1.1674	1.1481	1.1437	2.124	1.3537	1.2249	1.3951	0.6221	0.7845	1.2127	0.6783	0.6059	1.2231	0.6252	0.5188	0.6547	1.4162	1.6437	0.7902	0.8895	0.697	0.6621
N-acetylvaline	96-81-1		HMDB0011757	0.8925	2.392	0.9301	0.7874	1.1467	0.854	0.725	0.9085	0.792	1.4902	1.1772	1.0415	0.8828	0.7559	0.9763	1.0237	0.8406	1.4128	1.1712	1.1795	0.7219	1.3876	1.4033	1.3614	0.8348	1.7262	1.3732	0.8969	0.6106	1.1604
N-alpha-acetylornithine	6205-08-09	C00437	HMDB0003357	1.5495	1.08	1.0052	0.5517	1.2297	1.1023	1.1533	0.7206	0.75	1.3673	0.8136	0.8383	1.0022	0.8055	1.1828	1.5961	0.82	1.2766	1.4013	0.9978	0.6781	0.5407	0.742	1.8791	0.7731	1.8092	0.8102	1.5502	0.5781	0.403
N-carbamoylaspartate	923-37-5	C00438	HMDB0000828	1.6276	0.9719	0.6853	0.6728	1.511	0.6891	1.6738	0.5376	0.7346	2.0882	0.8944	0.6134	1.287	1.1666	1.2431	0.8383	1.0281	0.771	1.4368	1.1936	0.6298	0.6024	0.8317	2.5142	1.7837	1.1741	0.6082	2.6154	0.8648	1.2965
N-delta-acetylornithine		C00437	HMDB0003357	1.1803	0.8789	1.1144	0.9667	1.0659	0.671	1.1571	1.0448	0.7554	1.5179	1.7439	1.2335	0.8439	1.1399	1.748	0.7563	0.9248	0.9129	1.0224	0.9889	0.8014	0.7679	0.7344	0.8498	1.0461	0.8806	1.0111	1.3393	1.0575	0.7595
N-formylanthranilic acid	3342-77-6	C05653	HMDB0004089	1.2298	1.2463	1.8291	2.0262	1.1422	1.0805	1.4626	1.2421	1.5224	1.3948	1.4568	1.0158	1.1875	0.6743	0.9562	0.3293	0.8042	0.6289	0.5973	0.9985	0.4841	0.4196	0.7537	1.3023	0.3866	0.9306	0.3597	1.0015	0.4379	0.5998
N-formylmethionine	4289-98-9	C03145	HMDB0001015	1.0351	2.9969	0.9988	0.7524	0.8638	0.7226	0.7215	0.7358	0.7434	0.8665	0.8583	0.8986	0.9025	0.776	0.9587	1.4371	1.8631	1.9241	1.471	1.8216	0.8496	1.3879	1.8392	1.5686	1.0012	1.5926	1.4442	1.0312	0.798	2.0278
N-formylphenylalanine	13200-85-6		HMDB0240317	1.0527	1.6643	1.19	0.7794	1.7821	0.8881	0.725	0.6817	0.6103	1.6991	1.1969	1.0692	0.9926	1.0712	1.3939	1.3071	0.6799	0.9871	1.1381	0.9757	1.5634	1.0074	0.9136	1.5459	0.855	1.813	0.8158	0.9919	0.6672	0.8573
N-glycolylneuraminate	1113-83-3	C03410	HMDB0000833	0.6092	1.7721	0.642	1.1253	1.0565	0.8566	0.7271	0.5105	0.8407	3.5706	0.6131	0.2358	1.7494	0.628	0.9463	1.5692	0.6362	1.0606	0.5827	1.0537	0.8124	0.6847	0.8598	1.517	1.3047	1.6517	1.3507	1.3265	1.5377	1.4316
N-linoleoyltaurine*				0.8321	0.9759	0.8873	2.3086	0.8955	1.2984	1.8701	1.0724	1.3439	1.0241	0.7741	0.7874	0.9094	1.1728	0.9203	1.4858	0.9048	1.5356	0.6528	0.8933	1.6209	1.5098	1.2349	1.3802	0.9462	1.6604	0.808	0.7255	0.8248	1.2478
N-methylproline	475-11-6		HMDB0094696	1.0013	1.4306	0.6453	1.2158	0.7864	1.6018	0.9155	0.9589	0.7322	1.0362	1.0036	1.0125	1.1601	1.1578	1.4976	0.758	0.8536	1.1868	1.0502	0.8272	1.243	0.6462	1.04	1.2257	0.9309	0.9987	0.8554	0.9331	0.8966	0.7147
N-monomethylarginine	53308-83-1	C03884	HMDB0029416	1.1449	0.6962	1.3378	1.1583	1.3773	1.3846	0.9555	0.9627	0.912	1.4302	1.2563	1.4834	1.0345	1.2608	1.5985	0.6958	0.6687	0.6805	1.2973	0.9164	0.7939	0.6938	0.8271	1.3057	0.9655	0.5773	0.9456	1.2563	1.0701	0.5295
N-octanoylglycine	14246-53-8		HMDB0000832	0.9385	1.8797	0.5021	1.3025	0.6467	0.2144	1.6497	0.8603	0.5648	0.9702	0.7616	0.2419	0.3248	0.7717	0.482	0.8995	1.1747	1.5835	0.9805	1.0838	1.2227	2.4654	1.7292	1.5814	1.3364	2.6079	1.0478	0.5605	1.0195	2.0678
N-oleoyltaurine	52514-04-2			0.6875	0.9957	1.044	2.0945	0.9316	1.2975	1.3651	1.2186	1.5112	0.8988	0.899	0.8719	0.8169	1.1974	0.6663	1.6541	0.7293	1.1375	0.5352	0.8831	1.2229	1.3168	1.2225	1.0043	0.8144	1.1432	0.6568	0.5339	0.9001	1.2201
N-palmitoyl-phytosphingosine (t18:0/16:0)			HMDB0010697	1.0084	0.92	0.8009	0.3717	1.7962	0.5424	0.9916	0.6789	0.6416	1.1345	1.1215	0.6903	0.3184	1.2611	1.8477	0.392	1.5329	1.1261	1.923	1.1947	0.9631	0.5718	0.9535	1.8718	1.3516	1.7039	0.7471	2.1796	0.9059	1.3094
N-palmitoyl-sphinganine (d18:0/16:0)	5966-29-0		HMDB11760	1.4436	0.6589	0.6916	0.6503	2.0023	0.9046	1.1166	0.7349	0.9035	1.5108	0.9187	0.6097	0.3674	1.6207	2.188	0.3965	1.3663	1.03	1.902	0.9082	0.9036	0.4923	1.0506	1.8845	1.5539	1.0659	0.501	2.3382	0.97	1.1038
N-palmitoyl-sphingosine (d18:1/16:0)	24696-26-2		HMDB0004949	0.8777	0.8353	0.8584	1.036	1.263	1.3064	1.1474	0.787	1.008	1.4532	0.8008	0.8062	0.8999	1.3066	1.0712	0.7894	1.1003	0.8298	0.992	1.0156	0.8815	0.8631	0.8407	1.4507	1.0089	1.5056	0.6316	1.2058	0.6756	1.2649
N-palmitoyltaurine	83982-06-3			0.5919	1.6617	0.749	0.5919	0.5919	0.5919	0.5919	0.5919	0.5919	1.2241	1.5498	0.7627	0.7172	0.5919	0.7993	2.4737	0.5919	1.5598	0.8733	1.4424	0.5919	0.5919	0.9081	0.8607	0.9364	1.7255	0.5919	1.0636	0.5919	1.8359
N-stearoyl-sphingosine (d18:1/18:0)*	104404-17-3		HMDB0004950	0.8635	0.5611	1.0299	2.1948	1.8121	2.409	2.0363	1.4613	1.2653	1.8414	1.0882	1.0906	1.3109	1.7352	0.9701	0.7084	0.5913	0.5224	0.4457	0.8609	0.7605	0.9648	0.5315	1.459	0.7205	1.752	0.3538	0.8337	0.7436	1.1234
N-stearoyltaurine	63155-80-6			1.0212	1.0475	1.1439	1.2436	1.0696	0.9155	0.9852	0.9692	0.8442	1.4916	0.919	0.8396	0.8393	1.1649	1.0852	1.4099	0.7948	0.978	1.0329	1.0077	1.0186	0.987	0.8567	1.2819	0.9923	1.392	0.7156	1.1255	0.9088	0.9326
N1-Methyl-2-pyridone-5-carboxamide	701-44-0	C05842	HMDB0004193	1.1346	1.4348	1.3508	0.8924	1.1084	0.5552	0.7611	0.8559	1.5414	1.1925	0.8831	0.9229	1.3496	0.7316	0.9091	1.1726	1.0496	1.413	0.9644	0.9337	0.998	1.3445	0.9278	1.002	1.3984	0.9287	1.5739	0.8298	0.9743	1.3229
1-methyladenosine	15763-06-1	C02494	HMDB0003331	0.9203	1.2883	0.9305	0.8464	0.7735	0.7994	0.9495	0.9757	1.1002	1.1231	0.9721	0.8525	1.2031	1.0183	1.0372	1.1246	0.9676	1.1468	1.0123	0.7997	1.0259	1.5626	1.046	0.9877	1.165	0.9587	0.9836	0.9208	1.0629	1.1056
N1-methylinosine	20245-33-4		HMDB0002721	1.1456	0.8403	1.6253	1.5242	0.9418	1.2127	0.8643	1.0277	1.0444	1.1971	1.1632	0.9723	1.4932	0.9495	1.0339	0.9206	0.8322	1.1656	0.5398	0.5132	0.7584	1.5908	1.2034	0.8105	1.2754	0.4961	0.7879	0.5281	0.7972	1.1448
N2,N2-dimethylguanosine	2140-67-2		HMDB0004824	0.6701	1.0896	0.9957	0.6701	1.0484	0.6701	0.6701	0.9232	0.6701	0.6701	0.9481	0.6701	0.6701	0.6701	0.8334	0.8876	0.6701	1.6511	0.6701	0.957	0.9525	1.1119	1.1476	1.5835	0.6701	1.0043	1.1351	0.6701	0.8619	1.1972
N2,N5-diacetylornithine	39825-23-5			1.0079	1.4074	0.893	0.9419	0.8553	0.7415	0.7053	0.7856	0.8511	1.0412	1.1366	1.0702	0.8457	0.7283	0.9152	0.912	1.3847	1.2094	1.042	1.019	1.2045	1.2156	0.8697	1.1059	1.2565	1.3118	0.9921	0.9301	0.9273	1.3394
N2,N6-diacetyllysine	499-86-5			1.4879	1.0538	0.9205	0.6081	1.069	0.6297	1.0287	0.7771	0.902	1.0789	0.9543	0.8999	1.0821	0.7606	0.9349	0.8844	1.2772	1.245	1.3071	1.3034	0.9153	0.7931	0.8283	1.6798	1.2692	1.7244	0.9713	1.4223	0.6912	1.1045
N2-acetyl,N6,N6-dimethyllysine				0.9985	1.4548	0.9541	0.3754	0.5418	0.3754	0.9501	0.8511	0.6926	0.8758	0.6964	0.3754	0.742	0.8173	0.9497	0.968	1.2695	1.7928	1.071	0.8453	1.0499	1.1641	1.1935	1.1536	1.0015	1.2709	1.5966	1.0201	1.0376	1.2911
N2-acetyllysine	1946-82-3	C12989	HMDB0000446	1.4406	0.9813	0.9318	0.5849	1.248	0.7472	1.0295	0.8798	0.8876	1.4058	0.9179	0.8558	0.8633	0.8781	0.9997	1.0231	1.2743	1.2208	1.2906	1.3008	1.0003	0.9427	0.8179	1.7487	0.9184	1.7737	1.0887	1.3815	0.7438	1.1422
N4-acetylcytidine	3768-18-1		HMDB0005923	1.4998	1.0378	0.7345	2.1867	1.2943	1.9212	0.625	1.5574	1.1482	0.8077	1.3015	1.3593	1.3346	1.0133	1.3402	0.88	0.5735	0.7615	0.8169	0.4619	1	1.1916	0.801	0.7467	1.0797	0.2964	0.2964	0.712	0.8514	0.7016
N6,N6,N6-trimethyllysine	23284-33-5	C03793	HMDB0001325	1.0564	1.1895	0.8931	1.1557	1.0979	1.0953	0.9379	0.8742	0.9543	1.7683	0.9665	0.9784	1.1844	0.7771	1.009	1.1805	0.9412	1.1937	0.9766	1.104	0.7887	1.0729	0.843	1.386	0.9867	1.1909	0.9546	1.0114	0.925	0.991
N6,N6-dimethyllysine	2259-86-1	C05545	HMDB0013287	1.1031	0.9331	1.0434	0.9938	1.0036	0.9948	0.8664	0.822	1.0407	1.2141	0.9964	1.0141	1.2147	0.9538	1.1899	0.8856	0.9862	1.254	1.0077	0.9236	0.8534	1.0063	0.8163	1.3066	1.0247	1.0304	0.9383	1.1175	0.8172	0.9766
N6-acetyllysine	692-04-6	C02727	HMDB0000206	1.3765	0.6487	1.1496	0.8114	1.0821	0.848	1.0177	0.8232	0.9983	1.2393	1.0653	1.0567	1.1622	1.0027	1.1526	0.8543	0.8777	0.9738	1.0194	1.0017	0.6598	0.7831	0.6636	1.2215	0.9821	1.2127	0.8365	1.2217	0.7497	0.7935
N6-carbamoylthreonyladenosine	24719-82-2		HMDB0041623	0.9228	0.7096	1.1326	1.1286	0.7708	0.9225	1.3649	0.8256	1.3144	0.9925	0.8646	0.7096	1.0075	1.4166	0.7096	1.2669	0.8538	0.7096	0.7096	0.7188	1.3571	2.1807	1.0098	0.7096	0.806	0.8606	1.1925	0.7096	0.8944	1.742
N6-carboxymethyllysine	5746-04-03		HMDB0240347	1.1681	1.2799	1.1031	1.5568	0.9819	1.0318	0.9078	0.981	0.7755	1.463	0.8222	0.5246	1.0158	0.7605	0.2877	0.9796	0.9114	1.0221	0.9428	0.8361	0.2877	0.2877	0.2877	1.8755	0.7668	1.4815	1.1728	1.3546	1	1.2967
N6-methyllysine	1188-07-4	C02728	HMDB0002038	1.3898	0.73	1.3197	1.0853	1.2184	0.8895	1.2431	1.1979	1.079	1.2617	1.0323	0.7736	1.1557	1.0075	1.3113	0.7543	0.7775	0.9069	1.0308	0.9925	0.7415	0.884	0.5935	1.1576	0.6757	0.7133	0.7588	1.0774	0.7722	0.6772
N6-succinyladenosine	4542-23-8		HMDB0000912	0.8205	1.4126	0.837	0.524	0.9113	0.9932	0.6097	0.6904	0.4704	1.6022	0.9366	0.5859	1.8654	0.7641	1.4062	1.6465	0.6822	1.2684	1.2834	1.0351	1.0068	0.6583	0.8778	1.4859	1.4565	1.3155	1.0335	1.4571	1.5449	0.6757
nervonoylcarnitine (C24:1)*				0.4757	0.8603	0.5217	0.7361	0.7568	0.8011	0.7734	0.4814	0.5106	1.3587	1.092	0.848	0.429	0.852	0.5336	1.0718	1.0616	0.9769	1.0332	1.2225	1.0231	1.3971	1.1762	1.1899	0.8943	1.0563	1.182	1.1773	1.093	1.3489
nicotinamide	98-92-0	C00153	HMDB0001406	0.7965	0.9494	0.8036	1.399	1.2781	0.9951	0.8471	0.9518	0.8312	1.685	0.8005	0.5323	1.0195	0.7424	1.0571	1.2102	1.0062	1.461	1.1772	1.2636	1.1781	0.9703	0.8695	1.5415	0.912	1.5978	0.9516	1.0049	0.8626	1.0373
nicotinamide N-oxide	1986-81-8		HMDB0002730	0.7263	1.1113	1.3527	1.0434	0.8777	0.3308	0.888	1.0076	1.1366	0.9765	0.9601	0.8859	1.2958	0.8021	0.5538	2.1544	1.2878	1.4551	1.3926	1.1575	1.0967	2.0761	0.4094	0.7469	1.6555	0.4192	0.4255	0.9924	1.2942	0.5594
nicotinamide riboside	1341-23-7	C03150	HMDB0000855	1.1831	1.2678	1.2366	1.1578	0.9172	1.1471	1.223	1.1596	1.4016	1.4256	0.9018	0.9718	1.2072	0.6965	1.0628	0.968	0.9062	1.1845	0.9272	0.8562	0.9634	0.9938	0.9585	1.2688	0.8925	1.0677	1.0062	0.8839	0.7403	0.8632
nicotinate ribonucleoside	2625-49-2	C05841	HMDB0006809	1.1708	0.7711	1.1173	0.4179	1.0824	0.7556	1.0062	0.7276	0.9738	5.4559	0.8022	1.1862	1.4013	0.7219	1.1721	1.8226	0.7451	1.1078	0.9938	0.7088	1.016	0.5266	1.2203	1.3891	0.6112	1.6885	0.6276	1.276	0.3662	0.4646
nisinate (24:6n3)	68378-49-4		HMDB0013025	0.6013	1.6416	1.2123	1.4738	0.8207	1.5651	1.2555	0.9918	1.3383	1.1386	0.8977	0.5306	1.4455	1.0235	0.7774	1.3909	0.8318	0.879	0.7622	0.6803	1.7407	1.0055	1.7881	0.6575	1.2228	0.4113	0.984	0.5236	0.9945	1.3381
nonadecanoate (19:0)	646-30-0	C16535	HMDB0000772	0.8979	1.4045	1.0559	0.8652	0.9077	0.9387	1.3331	0.9761	1.1758	1.2404	0.8663	0.7596	0.8151	1.0659	0.8236	1.1827	1.2528	0.7862	1.2317	0.9751	1.745	0.995	1.2889	1.005	1.0778	0.9887	1.1026	0.9209	0.9907	1.1643
O-sulfo-L-tyrosine				1.3523	1.5335	1.0443	0.7505	0.9168	0.7653	0.9873	0.8039	1.3883	1.5746	1.0669	0.9578	1.2232	0.9779	0.935	1.1143	1.4159	1.2032	0.9348	1.162	0.9868	0.9747	0.9338	1.3339	1.1452	1.0127	0.8804	1.0415	0.9413	0.9471
octadecadienedioate (C18:2-DC)*				1.128	0.975	1.3106	2.3943	2.5552	1.253	2.7636	1.407	1.3944	1.5935	1.8717	1.0225	0.6068	1.1045	1.6029	0.7005	0.5983	0.9359	0.8935	0.8608	1.117	0.7225	0.97	0.7584	0.7304	1.1132	0.9775	0.9045	0.7086	0.538
octadecanedioate (C18)	871-70-5		HMDB0000782	0.9942	1.0102	0.9521	2.067	1.4182	1.3078	2.3465	1.2912	1.2254	1.2062	1.0399	0.8652	0.8598	0.8108	0.8164	0.6913	1.0521	1.0058	1.0134	0.8107	1.364	0.9486	1.1475	0.9427	0.8443	1.1735	0.5973	0.7853	0.791	0.8415
octadecanedioylcarnitine (C18-DC)*	123233-50-1			0.6981	0.6981	1.036	1.1577	1.0679	0.9746	1.3258	0.6981	1.0857	0.6981	0.6981	0.808	0.7578	1.5798	0.6981	0.6981	0.6981	0.6981	0.6981	0.939	1.1763	1	0.6981	0.6981	0.6981	0.8159	0.6981	0.6981	0.6981	0.9269
octadecenedioate (C18:1-DC)				0.9836	1.0015	1.0536	2.3046	1.6117	1.4311	2.779	1.3228	1.9591	1.3053	1.1665	0.9658	1.4066	0.9985	1.3231	0.5281	0.6985	0.6491	0.9356	1.0308	1.6349	0.6728	1.1107	0.5385	0.5986	0.8872	0.7595	0.6864	0.6522	0.548
octadecenedioylcarnitine (C18:1-DC)*	251981-06-3			0.8771	0.7272	1.4563	2.2658	1.3713	1.6576	2.6402	0.9044	3.3859	1.144	0.9375	1.0095	1.2971	4.1348	1.1158	0.6822	0.9899	0.7274	0.6708	1.5038	2.0884	1.3133	0.9905	0.6594	0.8148	0.9097	0.6038	0.6594	0.9155	1.9701
octanoylcarnitine (C8)	3671-77-0	C02838	HMDB0000791	2.3374	0.8541	0.5262	2.2289	1.0513	0.8777	3.2975	0.5841	1.2834	0.9517	1.0616	0.3155	0.6681	1.1307	0.4861	1.0483	0.6707	0.7658	0.4098	1.0665	1.2809	1.5552	2.5542	1.1013	0.7262	1.8426	0.6204	0.3513	0.8356	1.3198
oleate/vaccenate (18:1)		C01712,C08367,C00712,C21944	HMDB0000207,HMDB0000573,HMDB0003231,HMDB0240219	0.7721	1.1157	1.2401	2.0936	0.9245	1.8905	2.1399	1.4068	1.8628	1.056	0.8453	0.4225	1.2074	1.2184	0.5564	1.0068	0.89	0.915	0.5236	0.5723	1.7504	1.9733	1.6659	0.5394	0.9696	0.3301	0.7127	0.5068	1.1133	0.9932
oleoyl ethanolamide	11-58-0;111-58-0		HMDB0002088	0.8338	0.6334	1.386	2.063	1.3804	1.7749	1.5158	1.1737	1.6044	0.9319	1.0208	1.2104	0.9286	0.8828	0.6295	1.2464	0.8791	1.0783	0.5979	0.9782	1.3693	1.7336	1.3381	0.8419	0.93	0.9413	0.6974	0.5583	0.9792	1.3175
oleoyl-arachidonoyl-glycerol (18:1/20:4) [1]*			HMDB0007228	1.1409	1.3289	0.9767	0.8029	0.8701	0.6782	0.6658	0.6202	0.5045	1.1225	0.8501	0.4785	0.8669	0.6269	0.7046	1.0655	1.4245	1.2423	1.2833	1.0906	0.6813	0.9499	1.694	1.2749	1.4589	0.7046	1.0233	1.1105	1.443	1.3633
oleoyl-arachidonoyl-glycerol (18:1/20:4) [2]*			HMDB0007228	1.2283	1.4635	1.0209	0.683	0.8192	0.8439	0.6772	0.5336	0.5601	1.3618	0.7258	0.4984	0.955	0.5798	0.8144	1.2456	1.3642	1.4596	1.4182	1.0549	0.5549	0.9791	1.5815	1.5979	1.427	0.9783	0.9545	1.0474	1.2873	1.2049
oleoyl-linoleoyl-glycerol (18:1/18:2) [1]	106292-55-1		HMDB0007219	0.9456	1.7743	1.482	0.9691	0.9996	1.0781	0.816	0.7322	0.7999	0.8232	0.8065	0.6643	1.0715	0.7715	1.0174	1.0168	1.4694	0.841	1.109	1.0004	0.9029	1.2653	2.3785	0.7165	1.2802	0.4862	1.4146	1.0497	0.8846	1.6303
oleoyl-linoleoyl-glycerol (18:1/18:2) [2]	104346-53-4		HMDB0007219	0.9622	1.9755	1.3963	0.994	1.0557	1.1708	0.8213	0.6627	0.8721	0.9764	0.7226	0.6244	1.1514	0.7316	0.9596	1.1446	1.4313	1.006	1.1125	1.0489	0.9075	1.2976	2.0329	0.8753	1.1445	0.8056	1.5013	0.9129	0.725	1.6668
oleoylcarnitine (C18:1)	38677-66-6		HMDB0005065	0.4416	1.1411	0.838	2.6186	1.141	1.6269	2.0047	1.0089	1.4718	0.5728	0.9983	1.1406	1.0059	1.3454	0.4173	1.0017	0.6237	0.7519	0.3674	0.6224	1.3565	1.6504	1.3418	0.4754	0.6686	0.5296	0.8412	0.3874	0.5338	1.178
ophthalmate	495-27-2		HMDB0005765	0.4354	1.29	0.1212	0.4229	0.5373	0.5591	0.5893	0.443	0.3437	0.5231	0.2764	0.2168	0.3293	1.0113	0.3563	1.0572	2.2044	1.4349	2.4351	1.9091	3.8682	2.9514	0.9887	2.4117	2.2877	0.8783	1.9332	2.6631	1.7978	1.2078
ornithine	3184-13-2	C00077	HMDB0000214	1.3065	1.0129	1.1026	1.3782	1.2159	1.6403	0.9871	0.8945	0.7506	1.0858	0.8477	0.6091	1.4522	0.7812	0.9653	1.1068	0.6579	0.7691	1.3469	1.702	0.8153	0.6014	1.1654	1.792	0.7371	1.1887	0.6627	1.261	0.5619	0.6741
orotate	50887-69-9	C00295	HMDB0000226	0.8334	1.1867	0.8997	0.5891	0.8493	0.682	0.788	0.7407	0.9093	0.9888	0.7267	0.6475	0.7892	0.7633	0.9746	1.218	1.2757	1.4901	1.4003	1.2141	1.504	1.0112	1.2872	1.7174	1.185	1.8002	0.9694	1.5848	1.1015	1.4047
orotidine	314-50-1		HMDB0000788	1.068	1.0925	1.0599	1.1519	0.9835	0.9877	0.948	0.9097	0.8726	1.9737	0.9642	0.901	1.0853	0.8779	0.9356	1.1443	0.9378	1.1898	0.9957	1.0043	0.95	1.1567	0.9539	1.2787	1.0446	1.1847	1.0781	0.9718	0.8498	1.2226
oxalate (ethanedioate)	144-62-7	C00209	HMDB0002329	0.914	1.0654	0.8456	1.0479	0.9853	0.9475	1.0448	0.9699	0.9378	0.8548	0.9703	0.6518	1.0037	0.8387	0.9837	1.1205	1.1628	1.0935	1.2335	1.0462	1.0888	1.0907	1.4133	1.0757	1.0215	0.8657	0.7657	0.9963	0.7898	1.1658
p-cresol glucuronide*	17680-99-8		HMDB0011686	0.8148	1.7451	2.702	1.9128	2.2425	0.244	0.9918	1.3132	1.0562	0.8878	1.3777	0.1818	0.8602	1.0895	0.9071	0.5745	0.5752	1.1693	0.6438	1.0082	1.5927	0.5981	0.7009	0.8116	1.802	0.8077	1.2259	0.8365	1.2164	1.7912
p-cresol sulfate	3233-57-7		HMDB0011635	1.0594	1.2627	2.6172	2.0016	1.8698	0.4071	0.9556	1.1017	1.2339	1.0989	1.3517	0.2704	1.0387	0.9613	1.416	0.4793	0.6228	0.9321	0.6391	0.6644	1.1715	0.614	0.5493	0.6238	1.6077	0.5789	0.96	0.8042	1.1348	1.2697
p-hydroxybenzaldehyde	123-08-0	C00633	HMDB0011718	1.7705	1.2869	0.9504	0.4715	1.257	0.5413	1.3725	0.9232	0.7039	1.5481	1.4072	1.2511	0.9734	1.842	1.3372	0.4947	0.8925	0.5599	0.9994	1.3186	0.5291	0.606	0.4418	1.0006	1.2016	0.4849	0.653	1.6946	1.0581	2.1629
palmitate (16:0)	57-10-3	C00249	HMDB0000220	0.7798	1.1319	0.87	1.4557	0.9118	1.4107	1.6365	1.1369	1.4854	1.0138	0.8544	0.6078	0.9869	1.15	0.7312	1.0242	1.0131	0.9783	0.6999	0.7102	1.4418	1.513	1.3833	0.701	0.9793	0.5867	0.7677	0.6745	1.0259	1.0833
palmitoleate (16:1n7)	373-49-9	C08362	HMDB0003229	0.4705	1.5176	0.6833	2.9797	0.8357	3.0151	2.6581	1.5451	2.3589	0.4688	0.7622	0.3132	0.9297	1.0005	0.3321	0.9041	1.3276	1.4038	0.438	0.7055	2.0494	3.3106	3.5644	0.4157	0.9995	0.3061	1.0114	0.3394	1.3344	2.0785
palmitoleoyl-arachidonoyl-glycerol (16:1/20:4) [2]*				0.8235	2.9767	0.9031	1.7237	0.9336	1.1275	0.7831	0.8205	0.4899	0.729	0.4556	1.0323	1.3425	0.5134	0.6721	1.2225	1.4618	1.1148	1.0266	0.2872	0.7986	3.1363	2.7252	1.132	1.0473	0.5629	1.4485	0.9599	0.9734	1.6074
palmitoleoyl-linoleoyl-glycerol (16:1/18:2) [1]*			HMDB0007132	0.3725	3.3802	1.0355	0.7141	0.3725	0.9968	0.3738	0.5133	0.6353	0.3725	0.4312	0.5383	1	0.3725	0.3725	1.373	1.4157	1.1142	0.8422	1.5953	0.3725	1.3981	4.3858	0.3725	1.0823	0.3725	1.7302	0.3987	0.904	3.5561
palmitoleoylcarnitine (C16:1)*				0.3617	1.3795	0.8727	3.0116	1.2553	2.0049	2.4482	1.0152	1.8829	0.6107	0.9444	0.9078	0.9848	1.5872	0.3263	1.1631	0.7486	1.0255	0.299	0.8268	1.5949	1.9473	1.6251	0.4654	0.6823	0.5444	1.0345	0.2939	0.6892	1.8675
palmitoyl dihydrosphingomyelin (d18:0/16:0)*			HMDB0010168	0.7558	0.8886	0.9193	1.4145	1.0522	1.0804	0.9215	0.664	0.9446	0.9284	0.8326	1.1435	0.8044	1.0319	1.1547	0.6951	1.0005	0.9081	1.055	0.9507	1.0198	1.0249	1.117	1.1583	1.0191	0.9995	0.8242	1.1103	0.826	1.1014
palmitoyl ethanolamide	544-31-0	C16512	HMDB0002100	0.7987	0.8404	1.1075	1.1969	1.2057	1.3659	1.2576	1.1256	1.3351	0.9563	0.8636	0.8167	0.8186	1.0668	0.8969	1.062	0.8339	1.0437	0.7347	0.7475	1.2324	1.124	1.1748	0.9307	0.8355	1.074	0.6874	0.6358	0.7064	1.0992
palmitoyl sphingomyelin (d18:1/16:0)	6254-89-3		HMDB0010169	1.0678	0.8218	1.1004	1.1812	1.0848	1.0773	1.0954	0.9164	1.0875	1.0605	0.9892	1.2004	1.0312	1.0969	1.1116	0.7493	0.8822	0.8774	0.8791	0.8882	0.9782	1.0415	0.9181	0.9998	1.0002	0.8205	0.7359	1.0146	0.8934	0.8513
palmitoyl-docosahexaenoyl-glycerol (16:0/22:6) [1]*			HMDB0007121	0.4701	1.3451	1	1.2753	0.6186	1.3494	0.6752	0.5138	0.6945	0.7542	0.8154	0.803	1.8026	0.4701	1.0617	1.2976	1.2043	1.2732	0.9385	0.9292	1.1563	1.315	2.4892	0.7579	1.1125	0.6799	1.7076	0.9113	0.9093	1.2411
palmitoyl-linoleoyl-glycerol (16:0/18:2) [1]*			HMDB0007103	1.0099	2.1081	1.1463	0.9686	1.167	1.2498	0.8408	0.5826	0.5914	0.7714	0.6304	0.6723	1.0062	0.3854	1.0524	0.9938	1.594	0.9664	1.22	0.9191	0.7939	1.5537	2.5963	0.819	1.3097	0.3875	1.2437	1.1152	0.9339	2.1253
palmitoyl-linoleoyl-glycerol (16:0/18:2) [2]*			HMDB0007103	0.985	1.7868	0.9783	0.736	0.8455	1.163	0.6439	0.5228	0.691	1.015	0.5375	0.6886	1.0167	0.5528	1.0187	1.05	1.3252	1.0983	1.0763	0.9122	0.8248	1.3983	2.0081	0.7803	1.0568	0.6471	1.1146	1.1165	0.6175	1.2916
palmitoylcarnitine (C16)	6865-14-1	C02990	HMDB0000222	0.7261	1.1857	0.8217	1.7126	1.0487	1.4451	1.6002	0.894	1.285	1.1408	0.9513	1.2688	1.1061	1.3328	0.6677	1.2876	0.8054	0.8984	0.5621	0.8759	1.375	1.676	1.3814	0.6589	0.8596	0.8606	0.7742	0.5881	0.6781	1.2687
palmitoylcholine			HMDB0240592	0.3846	0.8463	0.4471	1.0192	1.3135	0.3846	0.5522	1.3638	0.4631	0.3846	1.0672	0.3846	0.3846	0.9	0.5404	0.8506	1.3494	0.5187	0.8876	1.3196	1.1016	1.482	1.5317	0.466	1.584	0.475	0.9808	1.4708	2.5909	1.0788
pantothenate (Vitamin B5)	137-08-6	C00864	HMDB0000210	1.1256	1.004	1.2296	1.3096	1.3316	1.447	1.0041	0.9921	1.0256	1.3649	0.9014	1.4893	1.5841	1.0918	1.4114	1.0432	0.7833	0.7239	0.9293	0.7317	0.6216	0.6438	0.6657	0.9701	1.0871	0.9354	0.8537	0.996	0.7203	0.8764
pelargonate (9:0)	112-05-0	C01601	HMDB0000847	1.0542	0.9323	0.6677	0.8331	2.0127	1.2862	1.2726	1.702	1.0093	1.3273	1.1266	0.7179	0.824	0.7628	0.7819	2.2278	0.8852	2.2048	1.0485	0.9907	0.6453	0.9225	0.5676	1.7431	0.8003	0.893	1.0798	1.1868	1.0701	0.6398
pentadecanoate (15:0)	1002-84-2;10002-84-2	C16537	HMDB0000826	0.7036	1.273	0.8835	1.452	0.8774	1.2651	1.6149	1.1076	1.3146	1.0908	0.8081	0.7028	1.1685	1.1778	0.8494	1.0014	1.0253	0.9986	0.7663	0.7993	1.6629	1.2464	1.3194	0.6813	0.916	0.5529	0.8248	0.6285	0.8386	1.0221
pentadecanoylcarnitine (C15)*			HMDB0062517	0.861	1.2184	0.8006	1.5306	1.1781	1.3256	1.5858	1.0574	1.4658	0.9928	1.0072	1.3051	1.0534	1.9352	0.6509	0.6755	0.8605	0.9894	0.6918	0.7768	1.6352	1.2666	1.0381	0.7866	0.8861	0.8465	0.9535	0.5567	0.7514	1.259
pentose acid*		C00803	HMDB0000892	2.9807	0.5529	0.9554	0.5498	2.3396	0.6736	1.3687	0.7221	0.4574	2.7637	0.9672	0.7433	0.7154	0.7427	2.3937	0.682	1.2505	1.2755	1.5247	1.0328	0.5618	0.0873	0.4918	3.0992	2.0549	1.967	1.0842	2.0528	0.7035	1.1562
perfluorooctanesulfonate (PFOS)	1763-23-1	C18142	HMDB0059586	0.5788	4.7036	3.772	0.4282	0.4282	0.4282	0.4507	0.4282	3.5361	0.4282	0.4282	0.4282	3.7259	3.5676	0.8258	0.4282	0.4282	0.4282	0.5693	0.4282	1	0.4282	0.4282	0.6296	3.3951	0.4906	0.6124	0.4282	2.4598	4.8945
phenol glucuronide	17685-05-1		HMDB0060014	0.99	2.084	0.6204	0.9778	0.9958	0.9039	0.6847	1.2081	0.4864	1.0042	1.0461	0.9313	0.6237	1.0366	0.4704	0.8206	1.4622	1.3241	1.4247	2.1042	1.2553	1.2511	1.926	1.731	0.8527	2.1113	0.5197	1.5255	0.4092	0.7116
phenol sulfate	937-34-8	C02180	HMDB0060015	1.0781	1.1946	0.9115	1.3287	1.0577	1.09	0.7961	1.0196	0.8639	1.2601	1.0216	1.1775	0.9458	0.9199	0.8833	0.7361	1.2575	1.049	0.9067	1.0292	0.9804	0.8753	0.902	1.2579	0.8454	1.0501	0.4955	1.153	0.5094	0.7071
phenylacetate	103-82-2	C07086	HMDB0000209	1.0159	0.8822	0.8669	3.1784	3.4042	2.654	1.0625	0.9841	0.6974	2.4523	1.8283	2.7323	1.8795	1.1586	1.1096	0.3022	0.4794	1.41	0.5863	1.2673	0.7112	0.4487	0.4542	1.1655	0.7686	1.7187	0.9465	0.9672	0.5347	0.3321
phenylacetylcarnitine	287108-21-8			2.1782	0.3777	1.3376	3.8011	2.2059	1.9436	2.394	0.7608	1.2232	1.2034	2.0399	1.0319	1.8503	1.9818	1.3347	0.184	0.184	0.2642	0.184	0.9681	0.6791	0.184	0.3154	0.2361	0.3778	0.3833	0.2466	0.3131	0.4428	0.184
phenylacetylglycine	500-98-1	C05598	HMDB0000821	1.1459	1.6364	1.5775	1.1618	1.4534	0.6316	0.8632	1.0669	1.2577	1.2679	1.1392	0.7995	1.0772	1.0543	0.7669	0.5709	0.8632	0.9331	0.53	1.1425	1.1902	0.9479	0.6494	0.8569	1.3423	0.6283	0.7289	1.0521	0.7066	0.8627
phenylacetyltaurine	33953-90-1			1.5263	1.0213	1.151	1.3553	2.3416	0.9127	1.6159	0.8284	0.6129	1.2326	1.2159	0.7881	1.0322	0.573	0.3004	0.4805	0.9553	2.2222	0.6213	1.4818	0.6091	0.7491	0.9787	1.7312	1.0545	1.5174	0.6093	1.0489	0.4274	0.9144
phenylalanine	63-91-2	C00079	HMDB0000159	1.0675	1.0973	0.9345	0.9374	1.1929	1.0459	0.8747	0.8985	0.9507	1.14	1.0195	0.9549	0.9942	0.9221	1.149	0.8266	0.9922	1.1467	1.0983	1.0753	0.9526	0.9626	0.9116	1.1097	1.0058	1.1583	1.0315	1.0837	0.7162	0.9321
phenylalanylhydroxyproline*			HMDB0011176	1.1329	0.8709	1.2057	0.859	0.96	0.877	1.0755	0.8626	1.0008	1.333	1.1569	0.9696	1.264	0.748	0.8278	0.9992	1.0955	1.4043	0.8642	0.7292	1.328	1.1737	2.0224	1.472	1.1937	1.1384	0.81	0.9948	0.8143	0.9975
phenyllactate (PLA)	828-01-3	C05607	HMDB0000779,HMDB0000563	1.2257	1.4418	1.9952	0.7488	1.203	0.6853	1.0977	0.5472	0.9564	1.3457	0.9966	0.9095	1.2847	0.9819	1.7354	0.905	0.9847	1.0513	1.0911	1.0524	0.6676	0.5604	1.4953	1.3229	1.0034	1.8501	0.9082	0.8754	0.56	0.7961
phenylpropionylglycine	56613-60-6		HMDB0000860	0.5608	3.1011	0.7832	0.7056	1.0988	0.3347	0.5561	0.8861	0.5102	1.1824	1.343	0.3363	0.269	0.3471	0.5031	0.7531	2.8108	1.6687	1.7966	2.0298	0.5307	0.9012	2.6261	1.6816	0.2656	2.7852	1.4853	1.3843	1.1388	1.7154
phenylpyruvate	156-06-9	C00166	HMDB0000205	1.2587	1.1257	1.1046	0.4033	0.9194	1.1262	1.0414	0.8133	0.6309	1.5901	0.9347	0.9335	1.4565	1.2365	1.062	0.9954	0.833	1.0046	1.0337	1.2032	0.4987	0.7976	0.7097	1.0396	0.6903	1.2166	0.623	1.216	0.5798	0.8335
phosphate	7664-38-2	C00009	HMDB0001429	0.7703	1.3736	0.9912	1.7307	1.3334	0.7662	1.183	0.6579	0.617	1.9918	1.0288	0.3436	1.153	0.8611	0.9994	1.9868	0.6699	1.2146	0.8236	0.7586	1.0006	0.6787	1.154	2.1312	0.969	2.2695	0.6721	1.0594	1.3735	0.8446
phosphoenolpyruvate (PEP)	10526-80-4	C00074	HMDB0000263	0.6772	2.4259	0.592	1.7943	1.2701	1.0621	0.9975	0.5176	0.4741	5.129	0.5389	0.1308	2.2848	0.5119	1.0025	2.077	0.4352	0.9005	0.6635	1.6588	0.5771	0.3137	0.4418	3.6587	1.1342	2.226	0.7347	1.7962	2.1468	1.6483
phosphoethanolamine (PE)	1071-23-4	C00346	HMDB0000224	0.8843	1.2299	0.5561	1.5053	1.494	1.133	0.9982	0.7056	0.8676	2.8179	1.0683	0.3624	1.2321	0.9102	0.7559	1.5607	0.6157	1.0052	0.7762	1.2102	0.9165	0.618	0.6972	1.8889	0.915	1.7131	1.0285	1.0018	0.9502	1.2461
picolinate	98-98-6	C10164	HMDB0002243	1.6781	1.5988	0.7626	0.477	1.1913	0.8525	0.5693	1.9109	0.6805	1.8015	1.8544	1.547	1.3052	0.686	1.0517	0.775	1.0981	0.6634	1.1031	0.9483	0.2016	0.7871	0.7251	1.8638	0.5832	2.0479	0.4284	1.683	0.3132	1.089
pimelate (C7-DC)	111-16-0	C02656	HMDB0000857	0.6056	2.6544	0.7066	0.525	1.2017	0.7521	1.6405	1.2415	1.0375	1.1103	0.9625	0.4973	0.3212	0.7823	0.8394	0.3853	1.3238	1.2356	1.2402	1.2698	1.4382	0.7806	1.9875	1.2003	0.4701	1.5959	1.5254	0.9101	0.6078	0.9463
pimeloylcarnitine/3-methyladipoylcarnitine (C7-DC)				0.249	2.1897	0.2151	0.2605	0.4395	0.4183	0.4058	0.3415	0.4666	0.3018	0.182	0.2335	0.2897	0.1681	0.1681	3.8774	3.1118	3.478	1.834	2.9568	4.1403	3.5612	7.4274	2.8146	1	6.4456	1.5368	1.3115	0.6541	2.4536
pipecolate	4043-87-2			1.3451	1.2546	0.8927	0.8023	0.617	0.7068	0.9633	0.964	1.0871	0.8722	0.8334	0.9765	1.0627	0.9005	1.0041	1.1801	1.2133	1.3118	0.9959	1.2239	1.1857	0.8988	1.3619	1.1765	1.0634	1.3256	0.7769	0.9088	0.8319	1.2351
prolylhydroxyproline	18684-24-7		HMDB0006695	0.9675	1.0222	0.8746	0.9875	0.7554	0.6075	0.8781	0.7828	1.0983	1.091	1.1188	0.778	1.4069	1.1326	1.0432	1.2168	0.8038	1.3825	0.7241	0.6296	1.0903	1.5912	1.1298	0.9613	1.0617	1.0215	0.9622	0.8661	0.8873	1.0125
proline	147-85-3	C00148,C000763	HMDB0000162,HMDB0003411	0.999	0.7476	0.8646	0.6469	1.1315	1.0172	0.8378	0.6254	0.882	1.4075	1.0771	1.1745	1.0538	1.1035	1.4452	0.9995	0.8542	1.2059	1.1779	1.0304	0.8024	0.6115	0.6752	1.2935	1.0005	1.3464	0.8376	1.2392	0.7965	0.6415
prolylglycine	2578-57-6		HMDB0011178	1.4102	0.9037	0.913	0.9523	1.1245	0.924	0.9942	0.9015	0.9205	1.5947	1.4286	1.0487	0.8937	1.3392	1.8016	0.6545	1.096	0.9567	1.0909	1.143	0.9835	0.8698	0.7878	1.3653	1.3683	0.999	1.001	1.4905	0.9872	1.1027
propionylcarnitine (C3)	17298-37-2	C03017	HMDB0000824	1.1317	0.9624	0.867	0.6394	2.0558	1.1981	1.42	0.9526	1.181	1.4783	1.1045	0.5018	0.8019	0.6707	1.0118	0.9568	1.0536	0.9882	1.3354	1.7378	1.2468	0.5345	1.4276	1.8728	0.8018	2.2942	0.6091	0.861	0.5447	0.9235
propionylglycine (C3)	21709-90-0		HMDB0000783	0.5189	2.8155	0.5807	0.9921	1.182	0.9976	0.8281	1.0024	0.8474	0.9291	1.2513	0.7761	0.6722	0.6576	0.8013	0.7761	1.5828	1.7644	1.5136	1.4375	1.1453	0.9659	1.2388	1.6909	0.8395	2.8632	1.1388	1.0289	0.5673	1.539
pseudouridine	1445-07-4	C02067	HMDB0000767	0.9008	1.1292	0.9651	1.1655	0.8478	0.9108	0.8768	1.1313	1.1738	1.1293	1.2381	0.8537	1.1504	1.0774	0.947	1.1453	1.0375	1.1365	0.9251	0.7463	0.8936	1.4785	0.8852	0.8758	1.2718	1.025	0.975	0.9142	1.0582	0.9697
putrescine	110-60-1	C00134	HMDB0001414	0.9602	0.8401	0.752	0.707	1.255	1.0101	0.7923	0.6136	0.9899	1.6586	0.9569	0.6843	1.015	0.7287	1.0385	1.4323	0.8706	1.112	0.9756	1.0455	1.1791	0.8032	1.1812	1.9529	1.1504	1.7601	1.0109	0.9896	1.2139	0.874
pyridoxal	65-22-5	C00250	HMDB0001545	1.7456	0.712	1.1434	1.5044	1.3019	1.7598	0.9143	1.0919	1.0449	1.5453	1.2717	1.9322	2.1759	1.2725	2.2963	0.4702	1.0177	0.8241	1.0758	0.7471	0.4351	0.4634	0.7271	0.9823	0.7336	0.9314	0.4881	0.9077	0.7391	0.6129
pyridoxamine	58052-48-5	C00534	HMDB0001431	1.604	0.3604	1.0483	1.2522	1.2885	1.813	0.6737	0.9485	1.0288	1.6284	0.9958	1.7296	1.6675	1.0405	1.8903	0.6617	0.8934	1.0938	1.1407	0.5079	0.6319	0.3301	0.9311	1.2485	0.7988	1.0042	0.4963	0.8374	0.7561	0.4594
pyridoxate	82-82-6	C00847	HMDB0000017	1.5023	1.1963	0.7863	0.8913	1.0913	1.4647	0.9606	0.929	1.1277	1.5179	0.5371	1.1812	1.1826	0.7297	1.233	0.6441	1.1026	1.5768	1.0193	0.7349	0.9206	0.9807	0.9535	1.5852	0.824	1.2443	1.2165	0.7688	0.4559	0.9738
pyrraline	74509-14-1	C21013	HMDB0033143	1.9045	0.5435	0.6353	0.5804	1.6823	0.6932	1.1814	0.886	0.528	1.7757	1.5432	0.8216	0.5322	0.7237	1.2213	1.114	1.4445	2.3737	1.742	2.1641	0.8011	0.4208	0.3566	2.9798	0.7291	3.1107	1.4518	3.2438	0.5626	0.4925
pyruvate	127-17-3	C00022	HMDB0000243	1.0257	0.7601	1.3336	0.3215	0.962	1.1212	0.7528	1.0644	0.8438	0.87	1.1725	1.719	0.9444	1.5202	1.0962	1.2733	1.0562	1.0227	1.1146	0.6718	0.9773	0.8961	1.1364	0.6212	1.1324	0.9622	1.1001	0.9348	0.858	0.8352
quinolinate	89-00-9	C03722	HMDB0000232	0.9806	1.6461	0.7604	0.7346	1.0194	0.4967	0.6742	1.5784	0.7242	1.282	1.4733	0.8759	0.9435	0.4786	0.7521	1.1311	1.6192	1.0763	1.1538	1.3543	0.4659	1.1689	0.8848	1.8133	0.9031	1.5877	0.3048	1.3916	0.4574	1.4645
retinal		C00376	HMDB0001358	1.3275	1.2751	0.582	1.1685	1.0149	1.0059	1.0279	0.6364	0.6546	1.4471	0.6408	0.9473	0.7844	0.7701	0.7277	1.5142	0.8348	0.9534	0.9322	1.563	0.7564	1.2761	1.2256	1.414	1.0343	0.8908	0.7095	1.2578	1.0341	0.9941
retinol (Vitamin A)	68-26-8	C00473	HMDB0000305	0.9886	1.0755	1.0508	0.9106	0.7592	0.8961	0.6116	0.73	1.0114	0.6343	0.6812	0.8908	0.8379	0.8628	0.8687	0.94	1.3332	1.3093	1.2863	1.3487	1.1439	1.1944	1.5155	1.2914	1.2291	1.164	0.6572	1.113	0.7682	1.8002
ribitol	488-81-3	C00532,C01904,C00474,C00379	HMDB0002917,HMDB0000508,HMDB0001851,HMDB0000568	1.1252	0.9509	0.8345	0.8628	1.0544	1.0195	0.8759	0.7514	1.2168	1.2852	0.7646	0.7063	0.8171	0.7746	1.0611	1.0818	0.9845	1.2035	1.1558	1.0155	1.0896	0.7097	1.2804	1.7576	0.8391	1.7441	0.848	0.909	0.5845	1.0893
riboflavin (Vitamin B2)	83-88-5	C00255	HMDB0000244	0.7362	0.6201	0.9639	1.4591	1.5151	1.8286	1.3604	0.7186	1.7922	1.1659	0.7851	0.9219	1.0361	1.6253	1.1818	0.7728	1.1011	0.612	0.5708	2.0542	2.1828	2.6883	0.7011	0.9342	0.4703	1.8976	0.386	0.6991	0.4874	3.0801
ribonate	5336-08-03	C01685	HMDB0000867	0.3875	0.7385	0.8477	1.0547	1.1509	0.9988	0.3875	1.0012	0.3875	1.1544	1.0372	0.7914	0.7934	0.6912	1.2433	1.07	1.5008	2.7858	0.9622	0.9773	1.5202	0.6981	1.3866	0.7706	1.3096	0.9614	1.0846	0.8777	0.8683	1.9454
ribose	50-69-1	C00121	HMDB0000283	1.7709	0.774	2.2494	1.2828	0.8139	0.7411	1.9047	1.7847	1.5151	0.5185	1.3031	1.2716	2.678	1.5145	1.3553	0.3789	0.5372	0.4466	1.1853	0.4218	0.5477	0.7819	0.9867	0.5904	1.5333	0.3172	0.4184	1	1.5621	0.3172
ribulose/xylulose			HMDB0000621,HMDB0000751,HMDB0001644,HMDB0003371	1.1943	1.1055	1.0718	0.9051	0.8094	1.033	1.2299	1.0447	1.0935	1.6016	1.0165	0.9333	1.1282	0.7868	0.9408	1.2553	0.8431	0.9675	1.0229	0.4712	0.9689	0.9835	1.245	1.18	0.9063	1.3518	0.6622	0.9073	0.9372	0.9514
S-(3-hydroxypropyl)mercapturic acid (HPMA)	23127-40-4			0.7103	3.1409	0.7719	0.3697	0.6157	0.5062	0.4808	0.3886	0.5512	0.8117	0.4834	0.768	0.6342	0.4895	0.8934	1.7523	2.735	3.0573	1.7244	2.0489	1.8365	2.8584	2.6361	2.0057	1.4349	2.2718	2.3496	1.1066	0.7633	2.3414
S-1-pyrroline-5-carboxylate	2906-39-0	C04322	HMDB0001301	0.8887	0.9764	0.9315	2.1145	1.7511	3.6249	2.1795	0.7695	1.3589	1.0044	1.1256	0.5042	1.6846	1.7898	0.8855	0.9415	0.9842	0.6885	1.0587	2.2259	1.7161	0.9508	4.0326	0.9019	0.9956	0.8159	0.4249	1.0265	0.8701	1.491
S-adenosylhomocysteine (SAH)	979-92-0	C00021	HMDB00939	1.1584	2.0527	0.1026	0.4217	1.9351	1.1059	0.9949	1.0224	1.0051	1.1394	0.8201	0.4866	0.2667	0.4222	0.9226	0.4812	1.2029	0.9351	3.0961	3.0484	1.2037	0.979	2.2936	1.8522	0.8026	3.1747	0.5058	1.3603	0.3318	0.7849
S-carboxymethyl-L-cysteine	638-23-3	C03727	HMDB0029415	1.3776	0.936	0.8498	0.571	1.3079	0.9849	0.9309	1.1934	0.839	1.3055	1.7968	0.8799	0.7726	0.9597	1.6147	0.7187	1.4552	1.5376	1.0342	0.8125	0.9544	0.6156	0.9468	1.6099	1.4052	1.6864	1.3106	1.4644	0.9775	1.0151
S-methylcysteine	1187-84-4		HMDB0002108	0.8256	0.9639	1.3918	2.5814	0.9336	2.1324	1.3138	1.5225	1.7122	1.1267	1.1359	2.9446	2.3513	1.6347	1.3917	0.7364	0.5356	0.6182	0.74	0.8125	1.0717	1	1.0854	0.5344	0.7999	0.5344	0.8818	0.7173	0.7583	0.5851
S-methylcysteine sulfoxide	6853-87-8		HMDB0029432	1.0007	0.0683	0.9993	1.2655	0.9534	1.2182	1.5178	1.185	1.1971	1.3359	1.2884	1.3698	1.4725	1.5913	1.0539	0.0683	0.0683	0.293	0.0683	0.0683	0.4717	0.4929	0.0768	0.2316	0.3339	0.0683	0.1919	0.2757	0.2782	0.0683
S-methylglutathione	2922-56-7	C11347		0.7592	0.9294	0.6033	1.4148	1.1837	1.4291	1.1562	0.7068	2.6882	0.965	0.5123	0.3859	0.7609	3.3016	1.211	0.3218	1.156	0.6045	0.6176	1.3611	2.0626	1.8217	1.3231	1.035	0.8106	1.2662	0.8971	0.4765	0.3153	3.442
S-methylmethionine	3493-12-07	C05319	HMDB0038670	0.4381	1.1047	0.3859	0.8064	1.1455	1.0463	0.3579	0.5631	0.451	1.2613	0.9748	0.8066	0.4235	0.8272	1.0422	0.748	0.9545	1.0083	2.3	1.5184	1.3289	1.3406	1.2623	1.8729	0.9598	1.2098	1.8844	1.3452	0.857	0.9917
salicylate	69-72-7	C00805	HMDB0001895	2.3685	0.8282	1.4756	0.6094	2.4592	1.2627	1.017	1.0933	0.8095	3.2312	3.0398	1.4611	0.938	0.8797	3.5389	0.7713	0.983	0.3844	1.2362	1.2054	0.1385	0.2529	0.9128	1.9856	0.4842	1.379	0.337	1.6824	0.5203	0.4733
sarcosine	107-97-1	C00213	HMDB0000271	1.5688	1.3372	0.8431	0.7497	2.1451	0.7859	1.0982	0.953	1.1794	2.6003	1.5383	0.977	0.7961	0.7615	1.6169	0.4833	1.0564	0.52	1.4172	1.7215	0.538	0.3617	0.9753	1.5112	1.023	2.0101	0.5095	1.3118	0.7569	0.7398
sebacate (C10-DC)	111-20-6	C08277	HMDB0000792	1.0672	0.9483	1.1248	1.2189	1.2471	1.0411	2.4638	1.0962	1.2118	1.124	1.2617	0.6913	0.8997	0.8478	1.1123	0.7008	0.8721	0.9589	0.7866	0.7606	1.1173	0.5335	1.691	1.2218	0.9176	1.5508	0.8892	0.8351	0.7869	0.7733
serine	56-45-1	C00065	HMDB0000187	0.9169	0.775	1.0431	0.9253	1.0857	1.2507	1.0561	0.7875	1.0772	1.3176	0.9667	1.347	1.0144	1.0396	1.219	0.9749	0.8622	1.0765	1.0483	0.932	0.9838	0.8061	0.7886	1.1137	0.9856	1.0948	0.8285	1.0359	0.8522	0.7161
serotonin	153-98-0	C00780	HMDB0000259	1.3031	0.9838	1.0214	0.9976	1.1629	1.0413	0.699	1.0288	0.933	0.8729	1.0024	0.7285	0.8714	1.1208	1.366	0.6682	1.0226	0.8466	1.4774	0.8728	0.877	1.0682	0.6511	1.1147	0.8429	0.9423	1.1552	1.0768	0.5646	1.0653
spermidine	124-20-9	C00315	HMDB0001257	1.8275	2.1927	0.97	0.2347	0.6928	0.3126	0.263	1.0147	0.122	4.0883	1.2947	0.5895	2.7794	0.0854	0.9853	2.0695	0.3327	1.4343	1.5397	0.3726	0.1974	0.2023	1.3959	3.1417	2.3693	0.7882	1.4773	1.6652	1.9937	0.104
spermine	71-44-3	C00750	HMDB0001256	0.8752	1.4203	0.4617	1.8304	1.0868	1.6139	0.8363	0.9519	1.2887	1.8074	0.697	0.2256	3.2796	1.7668	1.0481	0.8907	0.4845	0.5573	0.8852	1.9834	1.3689	0.3555	0.8289	1.2906	1.5613	0.5967	0.8341	0.8529	1.731	1.6652
sphingadienine	25696-03-1			0.4909	0.8662	0.9945	0.4909	0.7212	1.0055	0.4909	0.4909	0.4909	3.7958	0.4909	0.4909	1.9337	0.4909	0.4909	2.3127	0.4909	0.62	0.4909	0.4909	0.4909	0.4909	1.9146	1.9912	0.6691	1.1818	0.4909	0.7706	1.0125	0.6095
sphinganine	3102-56-5	C00836	HMDB0000269	0.7616	1.3026	1.3645	0.9471	1.0866	1.2911	0.9542	0.7047	0.8075	3.3924	0.6698	0.4867	1.5112	1.0161	1.1186	1.7431	0.7673	1.0313	0.6561	0.9085	0.6361	0.7619	1.6571	2.1103	0.8116	1.6172	0.71	1.2299	0.9839	1.2452
sphinganine-1-phosphate	19794-97-9		HMDB0001383	1.127	1.0157	1.2179	0.7762	0.9784	0.8583	1.0808	0.6866	0.7895	2.0505	1.0177	0.9838	0.9539	0.9843	1.2358	1.3487	0.929	1.2063	0.813	0.8904	0.9122	1.0619	1.2857	1.2288	0.7774	1.5104	0.7026	1.1229	0.698	1.0519
sphingomyelin (d17:1/16:0, d18:1/15:0, d16:1/17:0)*	121999-58-4			1.0349	0.8386	1.1489	1.397	1.399	1.2477	1.1513	0.9381	1.164	1.0428	1.0007	1.3122	1.0697	1.1982	1.1599	0.6574	0.9868	0.8821	1.0588	0.7191	0.9183	0.8097	0.7829	0.9993	1.0039	0.9106	0.8171	0.9391	0.8095	0.9299
sphingomyelin (d18:0/18:0, d19:0/17:0)*			HMDB0012087	1.2052	0.6705	1.2648	2.1719	1.8798	1.7984	1.6585	1.2006	1.2246	1.4914	1.3468	1.9759	1.0973	1.4639	1.2256	0.6832	0.7324	0.8205	0.7938	0.8481	0.9704	0.9364	0.753	0.9973	0.8997	0.8536	0.5319	1.0027	0.7662	0.9403
sphingomyelin (d18:1/14:0, d16:1/16:0)*			HMDB0012097	1.1162	0.8946	1.2318	1.4728	1.282	1.4199	1.0723	0.9305	1.1106	1.04	1.001	1.1697	0.9951	1.0477	1.1556	0.7617	0.9696	0.9767	0.9099	0.9061	0.9026	0.999	0.9817	0.9863	1.1069	0.8349	0.6703	1.0407	0.8715	1.0226
sphingomyelin (d18:1/17:0, d17:1/18:0, d19:1/16:0)	121999-64-2			1.1487	0.8413	1.212	1.7128	1.4245	1.3088	1.3048	0.914	1.203	1.1188	1.0993	1.398	1.1881	1.5185	1.317	0.6311	0.819	0.8005	0.9289	0.7908	1.0252	0.926	0.8452	0.9347	1.0787	0.8558	0.5868	0.9748	0.7848	0.9012
sphingomyelin (d18:1/18:1, d18:2/18:0)	108392-10-5		HMDB0012101	1.2101	0.6822	1.1321	1.3175	1.224	1.3562	1.2608	1.0014	1.1517	1.2465	1.1745	1.4414	1.1457	1.1957	1.1429	0.7123	0.6966	0.7761	0.7736	0.7465	0.7587	0.9804	0.8066	0.9723	0.9986	0.7152	0.5883	1.0701	0.8686	0.6776
sphingomyelin (d18:1/19:0, d19:1/18:0)*				0.9327	0.907	0.9596	1.5025	1.2832	1.1907	1.0501	0.7128	0.9662	1.1445	0.9104	1.4123	1.0814	1.2301	1.031	0.6854	0.9982	0.8098	0.8496	0.8398	1.0245	1.1742	0.7851	1.0018	1.1732	0.9964	0.5997	1.1087	0.8772	1.1404
sphingomyelin (d18:1/20:0, d16:1/22:0)*			HMDB0012102	0.6531	1.002	0.7342	1.0081	0.866	0.8299	0.7712	0.5469	0.7437	0.8254	0.6117	0.9236	0.7357	0.7145	0.7143	1.1133	1.2225	1.0955	1.067	1.1215	1.2067	1.6698	0.998	1.2119	1.2548	1.0832	0.7689	1.3321	1.0825	1.2874
sphingomyelin (d18:1/20:1, d18:2/20:0)*	222403-67-0			0.9676	0.9469	0.9868	0.9108	1.0977	1.1606	0.9135	0.9714	0.991	1.1307	0.9906	1.3291	1.1011	0.8992	1.0375	1.007	0.993	1.2266	1.2562	0.9862	1.224	1.2519	0.8341	1.1586	1.1563	1.1012	0.8319	1.2681	0.9373	0.8836
sphingomyelin (d18:1/20:2, d18:2/20:1, d16:1/22:2)*				1.2522	0.3585	1.0806	0.832	1.0815	1.154	1.1239	1.2564	1.1131	0.9339	1.3664	0.8802	1.0661	1.2418	0.926	0.3585	0.3585	0.3585	0.3585	0.3585	0.3585	0.5051	0.3585	0.4736	0.3585	0.384	0.3585	0.85	0.6461	0.3585
sphingomyelin (d18:1/21:0, d17:1/22:0, d16:1/23:0)*				0.6896	1.6674	0.7338	0.9908	0.6987	0.8017	0.657	0.4903	0.669	0.7231	0.5739	0.8732	0.7077	0.7441	0.71	1.1928	1.564	1.4864	1.36	1.6212	1.2529	1.7019	1.9894	1.0422	1.1269	1.5054	1.0373	1.0092	0.8287	2.27
sphingomyelin (d18:1/22:1, d18:2/22:0, d16:1/24:1)*			HMDB0012104	0.505	1.5342	0.523	0.5754	0.5369	0.5773	0.4505	0.418	0.4966	0.5179	0.4573	0.5861	0.497	0.498	0.5631	1.4391	1.5275	1.5746	1.4028	1.7502	1.2554	1.5469	1.6556	1.1838	1.1251	1.4168	0.9348	1.1076	1.0652	2.1037
sphingomyelin (d18:1/22:2, d18:2/22:1, d16:1/24:2)*				0.8443	1.2865	0.7415	0.6783	0.8189	0.634	0.7229	0.8449	0.7632	0.8593	0.8274	0.6868	0.7799	0.7769	0.9434	1.1959	1.2112	1.2789	1.3652	1.7802	1.3563	1.0566	1.2357	1.2055	1.0632	1.4009	0.7702	1.2743	1.1808	1.6819
sphingomyelin (d18:1/24:1, d18:2/24:0)*	94359-13-4		HMDB0012107	1.0046	0.9471	1.1066	1.0886	0.8864	0.8173	0.931	0.7131	1.0629	0.8892	0.778	0.7574	0.7727	1.0572	0.9194	0.8677	1.04	1.0129	0.972	1.1275	1.0039	1.105	0.9054	1.0614	1.1942	1.0032	0.76	0.9968	1.0851	1.2712
sphingomyelin (d18:1/25:0, d19:0/24:1, d20:1/23:0, d19:1/24:0)*				0.8858	2.1717	0.8035	1.3413	1.3172	1.1542	0.6146	0.9493	0.7793	0.9497	0.84	1.2153	0.8147	0.4034	0.4034	0.7003	1.2761	1.2577	1.3146	1.7259	1.1535	0.9853	1.2258	0.7574	0.8258	1.2381	1.2348	0.8137	1	2.4192
sphingomyelin (d18:2/14:0, d18:1/14:1)*				0.8112	1.019	1.1669	1.2131	1.1331	1.4381	0.9224	0.748	0.989	0.9287	0.7975	1.1106	1.0516	0.858	1.1119	0.9631	1.0175	0.8341	0.9248	1.011	0.876	0.871	1.105	1.0865	1.2339	0.8979	0.7695	1.0584	0.9698	1.0945
sphingomyelin (d18:2/16:0, d18:1/16:1)*				0.7572	1.0129	0.8454	1.0628	0.9107	0.9954	0.7539	0.6174	0.7615	0.8509	0.7115	0.9415	0.8019	0.8966	0.9477	1.0113	1.155	1.1725	1.1202	1.2378	1.1783	1.2224	1.2604	1.103	1.0046	1.0341	0.8665	1.1165	0.8667	1.1376
sphingomyelin (d18:2/18:1)*			HMDB0001348	0.9806	0.7929	1.05	1.4075	1.234	1.3552	1.0869	0.879	1.0146	1.0776	0.9264	1.3824	0.9874	1.0158	1.0658	0.914	1.0001	0.9255	0.9432	0.9999	0.8776	1.0883	0.9692	1.0368	1.112	0.909	0.7062	1.0188	0.894	0.9986
sphingomyelin (d18:2/21:0, d16:2/23:0)*				0.6529	1.7981	0.6178	0.7129	0.8709	0.7961	0.5668	0.4349	0.565	0.7626	0.6202	0.7878	0.6508	0.748	0.5742	1.2729	1.6246	1.6379	1.3383	1.7671	1.2719	1.3383	1.6225	1.3098	1.3065	1.5334	0.9498	1.0502	1.1159	2.6394
sphingomyelin (d18:2/23:0, d18:1/23:1, d17:1/24:1)*				0.9921	1.0876	1.0598	1.1671	0.9456	1.0421	0.8574	0.7255	0.9759	0.9607	0.8299	1.0662	0.9428	1.0625	1.0666	0.7288	1.02	1.01	0.9466	1.0261	1.0474	0.9857	1.0551	0.9603	1.1218	1.0079	0.7725	0.915	0.9272	1.5511
sphingomyelin (d18:2/23:1)*				1.036	0.9638	1.1049	1.2008	1.1656	0.9299	0.9083	0.8316	1.0244	1.1871	0.9758	0.9972	0.9289	1.288	1.2715	0.7011	0.949	0.9547	0.9963	1.0591	1.215	0.9189	0.9164	1.0028	1.1886	0.9875	0.6601	1.0561	1.0039	1.2991
sphingomyelin (d18:2/24:1, d18:1/24:2)*				1.0942	0.8769	1.0921	1.0984	1.0031	0.8975	0.9313	0.7954	1.0643	1.0622	0.9121	0.8708	0.9445	1.1841	1.2488	0.8532	0.9428	0.9964	1.0093	0.9969	1.125	0.9738	0.8686	1.0085	1.2222	0.9459	0.7136	1.1095	1.0063	1.141
sphingomyelin (d18:2/24:2)*				1.2574	0.7611	1.0883	1.0015	1.0929	0.861	1.0324	0.9669	1.1477	1.3708	1.1575	0.9786	1.1204	1.3461	1.4964	0.7763	0.8522	0.9331	0.9985	0.9607	1.2427	0.8686	0.7259	1.0359	1.0772	0.9864	0.6507	1.1971	0.9787	0.8682
sphingosine	123-78-4	C00319	HMDB0000252	0.6526	1.0515	1.2489	0.5776	1.0019	1.1753	0.7721	0.5284	0.5937	4.333	0.7446	0.3382	1.821	0.7016	1.0053	2.0666	0.7208	1.0026	0.4537	0.9981	0.6181	0.5259	1.5483	2.3161	0.7815	1.6974	0.5235	1.2858	1.0026	1.0133
sphingosine 1-phosphate	26993-30-6	C06124	HMDB0000277	1.1795	1.0144	1.272	0.7725	0.9545	0.8307	1.0694	0.9741	0.8099	1.6523	1.0775	0.9591	0.8981	0.8175	1.0572	1.302	1.0163	1.1789	0.9796	0.9856	0.9706	0.9714	1.1784	1.0807	0.8809	1.3846	0.9082	1.1221	0.732	1.0415
stachydrine	4136-37-2	C10172	HMDB0004827	1.2874	0.8807	0.9794	0.7001	1.042	0.8081	0.9965	1.0547	1.0817	1.2111	1.2281	0.7771	0.7357	1.0526	2.1058	0.7529	0.9494	1.162	1.228	1.0282	1.0035	0.6316	0.8575	1.6286	0.9422	0.8229	0.9289	1.3753	1.2625	0.9088
stearate (18:0)	57-11-4	C01530	HMDB0000827	1.0289	0.9977	1.2175	1.3441	1.064	1.274	1.6876	1.1945	1.4227	1.2209	0.9781	0.7981	0.9033	1.2466	1.0023	0.8885	0.8639	0.7815	0.8782	0.8168	1.3682	1.1505	1.131	0.8489	0.8951	0.8019	0.78	0.8752	1.0166	0.9222
stearidonate (18:4n3)	111174-40-4	C16300	HMDB0006547	0.7216	1.479	1.0002	2.1702	0.9646	1.8218	1.7904	1.1288	1.2051	0.8628	0.7614	1.0782	2.2794	0.9621	0.6445	1.2969	0.9476	1.0447	0.7304	0.6266	1.3795	1.8602	1.9808	0.5702	0.9998	0.5304	0.8104	0.5578	0.9225	1.2406
stearoyl ethanolamide	111-57-9		HMDB0013078	0.9247	0.8528	1.144	1.8016	1.2547	1.5654	1.5628	0.9863	1.5118	0.9532	0.9083	0.9735	1.0336	1.1924	1.028	1.1695	0.9591	0.9904	0.8026	0.8604	1.3186	1.4619	1.3234	1.0046	0.9954	0.9658	0.7735	0.8525	0.9029	1.2026
stearoyl sphingomyelin (d18:1/18:0)	85187-10-6;85187-10-6	C00550	HMDB0001348	1.4028	0.6437	1.2408	1.7704	1.6513	1.7352	1.6326	1.2376	1.4505	1.5426	1.3391	1.7928	1.529	1.4851	1.3293	0.6177	0.6879	0.7322	0.7068	0.6935	0.8574	0.8279	0.6701	0.8311	0.9947	0.7815	0.5091	1.0053	0.7486	0.6324
stearoyl-arachidonoyl-glycerol (18:0/20:4) [1]*		C00165	HMDB0007170	0.3769	1.1282	0.8375	1.097	0.5825	1.0246	0.7882	0.3769	0.3769	1.834	0.4726	0.3769	0.5759	0.6289	0.3769	1.1364	0.73	1.5798	0.9754	1.4513	1.3278	1.1924	0.7608	1.5609	1.1357	1.5237	0.9696	0.9282	0.8825	1.6183
stearoyl-arachidonoyl-glycerol (18:0/20:4) [2]*			HMDB0007170	0.6624	0.5301	0.7952	1.4904	0.8188	0.9832	0.5301	0.5301	0.5301	1.9842	0.5301	0.5301	0.5301	0.8834	0.5301	1.0891	0.5301	1.257	0.6993	1.4881	1.1342	0.875	0.5301	1.8661	1.0111	2.6635	0.8003	1	0.5301	0.5301
stearoylcarnitine (C18)	18822-91-8		HMDB0000848	0.8012	0.9607	0.8425	1.2592	1.1151	1.2604	1.3408	0.8442	1.0245	1.0703	1.0205	1.2724	1.0229	1.2232	0.964	1.0471	0.8541	0.9823	0.7784	0.9122	1.1989	1.5366	1.0576	0.832	0.9791	0.905	0.9088	0.8109	0.7705	1.0177
suberate (C8-DC)	505-48-6	C08278	HMDB0000893	0.7542	1.7226	0.7012	0.9569	1.3442	0.8899	1.7308	0.962	1.0145	1.157	0.9855	0.6021	0.5608	0.6959	0.8057	0.755	1.4987	1.5849	1.1505	1.5211	1.6038	0.9776	2.4918	1.2184	0.7119	2.4726	1.1191	0.797	0.482	1.4844
suberoylcarnitine (C8-DC)				0.5926	1.3867	0.7557	2.13	0.5788	1.9024	2.0496	0.9759	0.3598	0.3598	0.7089	1.286	1.6905	1.0913	0.3598	1.0241	0.7841	1.2218	0.5317	0.7944	1.2597	1.3597	1.8395	0.3598	0.483	0.8178	0.9697	0.3598	0.6768	2.0088
succinate	110-15-6	C00042	HMDB0000254	1.3828	0.9766	0.6274	0.7162	1.368	1.1818	1.1698	0.9281	1.3324	1.2505	0.9519	0.6099	1.0473	0.6854	1.0482	0.819	0.9921	0.9364	1.075	1.2487	1.5133	0.7678	1.381	1.4302	0.9594	1.4134	0.8228	0.8388	0.5506	1.0079
succinoyltaurine				0.9908	1.4727	0.9693	2.2343	1.2256	2.4708	1.1324	0.851	1.0333	2.0813	0.5404	1.212	1.7011	0.4326	0.416	1.0092	0.6268	1.3533	0.4945	0.7862	0.7727	0.6614	0.8886	1.698	0.5168	2.2845	1.0095	0.3329	0.2281	1.7749
succinylcarnitine (C4-DC)	256928-74-2		HMDB0061717	1.0129	0.9078	1.0188	2.3474	1.1327	1.4198	1.1804	0.7284	0.8799	2.5162	0.7902	0.543	1.6903	0.8839	0.9511	1.5741	0.4837	1.0032	0.7678	1.1494	0.6891	0.4498	0.4858	1.7045	0.5851	1.8635	0.9968	1.047	0.8046	1.0363
sucrose	57-50-1	C00089	HMDB0000258	1.576	0.3075	4.4946	0.1658	0.4916	0.5012	0.1869	0.1658	0.1658	1.3598	1.916	1.5299	2.0513	0.6792	1.3361	0.9484	0.3354	0.5661	1.2301	0.8968	1.7321	0.1658	1.2326	3.4013	1	2.3642	1.2755	0.8001	0.6204	0.7099
sulfate*	14808-79-8	C00059	HMDB01448	0.7605	1.11	0.9669	1.2911	0.6911	1.1247	1.0001	1.2352	1.0864	0.8404	0.98	1.0885	1.047	0.8738	0.9328	0.9821	1.1464	1.0429	1.1614	0.9999	1.075	1.1356	1.0609	0.8337	0.6568	0.9784	0.7286	0.881	0.6557	1.0778
tartarate	87-69-4;6106-24-7	C00552,C00898,C02107	HMDB0062642,HMDB0000956	1.2786	1.6481	0.5765	0.5765	1.3923	0.5827	0.7094	1.1039	0.5768	0.6575	1.4399	1.1177	1.4186	0.7274	1.4085	1.4253	0.982	0.5765	1.0502	0.8172	0.5765	0.8327	0.5765	0.8505	1.018	0.9361	0.5765	1.0978	0.5765	0.6554
tartronate (hydroxymalonate)	80-69-3	C02287	HMDB0035227	1.0502	1.1666	0.7376	0.9291	1.2385	0.8973	0.9625	0.9881	0.8356	0.8885	1.01	1.0897	0.99	0.783	0.9279	1.3867	1.2519	1.0437	1.2334	1.0537	0.8659	0.8544	0.6506	1.0288	0.9237	1.0745	1.0564	1.3592	0.9655	1.1375
taurine	107-35-7	C00245	HMDB0000251	1.0154	1.2158	0.8778	1.5823	1.0064	1.1207	0.9834	0.7948	0.8956	2.0284	0.872	0.6275	1.2352	0.7196	0.7864	1.332	0.7767	0.9936	0.8439	1.1577	0.9058	0.7144	0.8451	1.385	0.9763	1.533	1.0695	1.082	1.1136	1.2461
taurochenodeoxycholate	6009-98-9	C05465	HMDB0000951	0.5913	0.9786	1.0214	60.1795	35.6875	67.9136	143.86	0.525	322.859	0.3748	0.4013	5.1715	0.4736	198.7	22.2827	0.7293	58.3395	0.481	0.6699	130.493	161.495	98.4876	0.5439	0.4034	0.1433	56.505	0.264	0.6093	0.2301	234.16
taurocholate	145-42-6	C05122	HMDB0000036	0.4622	1.0831	0.8504	65.3473	38.5719	63.872	61.4767	0.5677	138.926	0.5558	0.3566	9.3845	0.7174	115.194	22.7687	0.9169	45.6677	0.4208	0.7229	58.7075	79.7434	55.8606	0.3677	0.4212	0.1756	26.6526	0.3132	0.5654	0.2474	129.294
taurocholenate sulfate*				0.148	0.148	0.148	2.0974	0.8235	1	1.5279	0.148	2.203	0.148	0.148	0.2046	0.148	2.5337	1.3627	0.148	0.148	0.148	0.148	0.2782	0.2154	0.148	0.148	0.148	0.148	0.148	0.148	0.148	0.148	0.148
taurocyamine	543-18-0	C01959	HMDB0003584	0.9561	1	0.8001	1.8797	1.3952	1.0012	1.2924	1.0552	1.0089	2.4337	0.9914	0.437	1.2942	0.437	0.7479	1.421	0.7994	1.1184	0.7136	1.0395	0.437	0.8886	0.681	1.4283	0.437	0.8946	0.5643	0.8996	0.7522	1.3827
taurodeoxycholate	207737-97-1	C05463	HMDB0000896	1.1515	0.8485	0.7871	26.8339	22.726	35.6501	36.2888	0.5264	71.2864	0.8108	0.563	4.4412	0.7352	69.8199	14.7904	0.5673	29.4149	0.2553	0.7092	48.8115	56.0647	31.5884	0.3607	0.3393	0.2009	25.8144	0.1446	0.7393	0.2457	73.0756
taurodeoxycholic acid 3-sulfate				0.0514	0.0514	0.0514	1.6408	0.3621	0.7447	1.2553	0.0514	2.3714	0.0514	0.0514	0.0514	0.0514	1.8206	0.6441	0.0514	0.0514	0.0514	0.0514	0.0514	0.0514	0.0514	0.0514	0.0514	0.0514	0.0514	0.0514	0.0514	0.0514	0.0514
taurohyodeoxycholic acid	38411-85-7		HMDB0000874	0.8564	0.5653	1.1436	45.9837	40.7733	60.2427	61.8051	0.6817	79.8423	0.552	0.7282	5.6774	0.5925	103.011	23.2102	0.2533	23.4139	0.2174	0.3625	45.7236	40.8794	21.0933	0.1795	0.206	0.2556	16.4199	0.1719	0.2845	0.1743	66.4225
taurolithocholate	516-90-5	C02592	HMDB0000722	0.0353	0.0353	0.0353	0.5882	0.3238	1.0316	1.0707	0.0353	3.515	0.0353	0.0353	0.0353	0.0353	3.5925	0.2819	0.0353	0.5789	0.0353	0.0353	1.5134	1.9035	0.7954	0.0353	0.0353	0.0353	0.9684	0.0353	0.0353	0.0353	2.2562
tauroursodeoxycholate	14605-22-2		HMDB0000874	0.6347	0.4826	1.3653	46.4561	34.8508	39.2892	54.2014	0.4247	90.2558	0.632	0.3328	6.4841	0.5967	96.7717	22.2358	0.3503	26.7402	0.1887	0.2646	33.0092	54.9442	29.9198	0.2895	0.2199	0.0842	17.2249	0.0893	0.278	0.1428	81.7293
tetradecadienedioate (C14:2-DC)*				1.0455	1.032	1	1.4589	1.3455	1.3494	1.6404	1.2669	1.3656	0.8915	1.4735	1.273	1.0647	1.2345	1.6301	0.7192	0.6763	0.695	0.5409	0.8754	1.6338	0.7727	0.9008	0.8926	0.7215	0.5409	0.7589	0.7014	0.6371	0.8874
tetradecadienoate (14:2)*	39039-37-7		HMDB0000560	0.4252	0.8817	0.9285	4.1798	1.2825	2.847	2.8324	1.7237	2.0161	0.6242	0.8089	0.9177	0.7285	1.1442	0.4732	1.5528	0.8722	1.398	0.5379	0.3932	2.5313	2.5476	2.2118	0.6017	0.9775	0.7327	1.3753	0.3923	1.0225	1.1986
tetradecanedioate (C14)	821-38-5		HMDB0000872	1.0046	0.9758	1.0084	1.7759	1.7538	1.6135	2.2747	0.937	1.9214	0.9134	1.0357	0.6487	1.2679	0.9392	0.8501	1.3307	0.7319	1.0873	0.6585	0.6016	1.0931	0.8848	1.0546	0.9954	0.9414	1.0191	0.6705	0.4661	0.8619	1.169
thiamin (Vitamin B1)	59-43-8	DG00125,C00378,D08580	HMDB0000235	1.1829	1.6366	0.9349	0.6388	1.1723	1.4286	0.7225	0.4898	1.3945	3.9322	0.7988	0.8979	1.2378	0.5997	1.0077	2.0315	1.4271	3.0583	1.0895	0.8678	0.9923	0.6887	1.54	5.0711	0.7183	7.4694	0.7889	0.3543	0.2247	0.7642
thioproline	34592-47-4			0.9437	1.2374	0.8772	0.7054	0.8618	0.9306	0.8203	0.8068	1.0023	1.2742	0.8426	0.7765	1.5286	1.0141	0.9551	0.9985	0.9292	1.2471	1.0706	1.0529	1.1945	1.0069	0.8019	1.3899	1.1671	1.4005	0.7254	0.937	1.0015	1.098
threonate	70753-61-6	C01620	HMDB0000943,HMDB0062620	0.9999	1.0082	0.8373	0.9739	0.9806	0.9979	0.9373	0.8741	1.0001	0.8488	0.9304	0.7217	1.0201	0.8698	1.0635	0.8799	1.1681	1.1847	1.2172	1.2092	1.2329	1.0375	1.6569	1.2629	1.1585	1.1069	0.8562	0.9658	0.743	1.369
threonine	72-19-5	C00188	HMDB0000167	0.9823	0.8815	0.9635	0.9511	1.2131	1.2863	1.0645	0.8589	1.1205	1.4385	1.1012	1.2508	0.9555	0.991	1.1991	0.9291	1.009	1.1247	1.1072	1.0136	0.9854	0.7719	0.9127	1.1928	0.8995	1.3094	0.8855	1.0311	0.7339	0.8042
thromboxane B2	54397-85-2	C05963	HMDB0003252	2.0158	1	0.6101	0.3946	1.2804	0.9207	0.7069	0.7979	0.5583	3.4946	1.2233	0.3058	0.7603	0.8524	0.9576	1.342	1.0356	1.1099	0.7156	2.8227	1.2383	2.0787	0.3058	0.8042	0.5875	1.7169	1.643	1.2078	0.6462	1.1442
thymidine	50-89-5	C00214	HMDB0000273	0.8823	1.3502	0.8476	0.8012	1.4542	0.7859	0.8674	1.0006	1.3526	1.8733	1.8058	0.7145	0.9994	1.345	0.9185	0.7953	1.2504	0.8209	0.7647	0.8541	2.101	1.1584	1.3782	0.9575	1.6739	0.7336	2.0089	0.8351	1.0437	1.2962
thymine	65-71-4	C00178	HMDB0000262	0.8087	0.7687	1.0593	0.7923	1.5977	1.5022	0.7458	0.7689	1.1188	1.3199	0.7803	0.5942	1.1622	0.7474	1.0097	2.2638	0.6651	1.2206	1.0707	1.1023	0.9209	0.7224	0.7431	1.6064	0.8951	1.3257	1.3091	0.9903	0.6828	1.1431
thyroxine	51-48-9	C01829	HMDB0000248	1.2835	1.0883	1.4903	0.8096	0.6624	0.9034	1.1227	1.3034	0.8959	0.9958	0.9195	1.088	1.1039	0.6302	0.8127	1.2691	0.8382	0.6674	1.1305	0.9559	1.0917	1.0037	1.3423	0.9963	1.18	0.541	0.5316	1.164	1.1119	0.6799
tigloylglycine	35842-45-6		HMDB0000959	0.7308	1.3346	0.8125	1.726	0.7059	0.9594	1.5377	0.8366	0.8436	1.1437	0.7094	0.7206	0.7136	0.821	1.0107	0.4956	1.439	2.4427	1.4713	1.6578	1.4911	1.1366	0.9893	1.28	0.8663	2.7227	1.6987	0.688	0.4696	1.3879
tiglyl carnitine (C5)	64191-86-2		HMDB0002366	0.5209	1.4385	0.5209	0.6223	1.1567	1.8553	1	0.5209	0.5209	1.9241	0.7677	0.5209	1.1161	0.7701	0.6139	1.7169	0.5209	0.8669	0.5209	1.218	0.5209	0.5209	0.6962	1.779	0.5209	2.848	0.8936	0.9911	0.7894	1.2087
trans-2-hexenoylglycine				0.5231	1.704	0.4826	1.2715	0.4655	0.4632	1.4443	0.5703	0.6901	0.5534	0.4394	0.3345	0.3345	0.5506	0.3345	0.9495	1.1741	2.0758	1.1873	1.0812	1.2256	2.0098	1.8553	1.2967	0.5852	1.6819	1.0505	0.7079	0.6262	1.4209
trans-3,4-methyleneheptanoylglycine				0.3749	2.6322	1.2099	1.3043	1.0251	1.4163	1.7228	1.1297	1.8354	0.5534	0.9276	0.9698	0.9202	1.5361	0.4354	0.5191	0.9749	1.624	0.441	0.8138	1.1606	1.4138	1.6409	0.7117	0.9281	0.7356	1.3581	0.6164	0.6399	1.6719
hydroxyproline	51-35-4	C01157	HMDB0000725	0.7682	0.9511	0.8738	0.8915	0.9725	0.7446	0.9074	0.7324	0.845	1.1535	0.9773	0.6831	1.0181	0.976	0.9207	1.4793	1.0906	1.5249	0.9952	1.0048	1.3756	1.2611	1.3009	1.3695	1.2098	1.2446	1.0121	1.2144	1.2531	0.8758
trans-urocanate	104-98-3	C00785	HMDB0000301	1.4736	0.8835	1.6162	1.376	1.4308	0.9961	1.0408	1.0545	0.754	1.7836	1.3184	0.6227	1.6793	0.6899	0.6027	0.9843	0.7455	1.3671	1.1258	1.284	0.4329	0.8447	1.0396	1.3841	0.8922	0.9204	0.7557	0.767	0.3951	1.0039
tricosanoyl sphingomyelin (d18:1/23:0)*			HMDB0012105	1.0648	1.0135	1.3777	1.5638	0.9707	1.2503	0.9871	0.6809	1.1812	1.0381	0.8314	1.3825	1.1137	1.1319	1.1277	0.6255	0.9415	0.8986	0.6298	0.7829	1.0129	1.1392	0.9841	0.7809	1.1326	0.7963	0.7168	0.8665	0.8453	1.3053
trigonelline (N'-methylnicotinate)	535-83-1	C01004	HMDB0000875	1.3362	0.8185	0.9181	0.7686	1.1883	1.0485	0.8495	0.6734	0.9214	1.2713	0.8946	0.8815	0.6912	0.9479	1.3159	0.7761	1.0748	1.2145	1.1145	1.003	0.7061	0.6345	1.0665	1.5721	1.0582	1.2978	0.997	1.3001	1.0203	0.9568
trimethylamine N-oxide	1184-78-7	C01104	HMDB0000925	2.4167	0.8341	4.2356	5.1725	4.9772	3.0996	3.713	4.2491	1.949	2.5045	4.0734	2.1738	2.5698	1.9651	1.2605	0.454	0.654	0.6655	0.4131	0.5097	0.3036	0.5248	1.0167	0.8433	0.5213	0.3308	0.3354	0.686	0.4863	0.9833
tryptophan	73-22-3	C00078	HMDB0000929	1.0905	0.9818	1.1418	0.8446	1.2049	1.0639	1.1025	1.2041	1.0974	1.2555	1.1964	1.2606	1.1373	0.9282	1.2043	0.6591	0.8443	0.8086	1.0217	0.9753	0.768	0.7743	1.0182	0.9172	0.973	0.9259	0.7742	1.0496	0.679	0.8554
tyrosine	60-18-4	C00082	HMDB0000158	0.9616	0.9981	0.824	0.7556	1.3144	1.2143	1.0019	0.6956	1.0717	1.038	0.9508	1.3432	1.0595	1.181	1.2034	0.7716	0.9431	1.122	0.9164	1.0453	1.1917	0.8334	0.9055	0.9874	1.0797	1.1522	0.8855	1.0989	0.7833	0.8195
UDP-N-acetylglucosamine/galactosamine		C00203,C00043	HMDB0000304,HMDB0000290	0.5208	1.2196	0.5208	1.7469	0.9692	1.9703	0.5208	0.5208	0.5208	1.8576	0.7134	0.5208	0.5208	0.5208	0.9841	2.7458	0.6826	1.3575	0.6657	0.7664	0.6798	0.5208	0.5208	1.6054	0.5208	1.6412	1.6618	0.8809	0.5208	1
undecanedioate (C11-DC)	1852-04-6		HMDB0000888	0.8359	0.7841	0.5547	1.0131	0.8916	1.3094	1.2547	0.9869	1.2367	1.2625	1.2217	0.702	1.2153	1.0934	0.7529	1.2917	0.7661	1.1366	0.5547	0.5547	0.9331	0.5547	0.5547	1.0664	0.7661	1.1376	0.5547	0.5547	0.7438	0.8165
undecanoate (11:0)	334-48-5	C17715	HMDB0000947	1.6123	0.4666	0.9099	0.6813	0.4407	0.4407	0.8406	1.0571	1.6777	0.9857	1	0.658	1.0479	2.4022	0.9592	3.1886	0.9582	1.3597	0.6109	1.0075	0.6668	0.7876	0.9224	1.7413	1.1724	1.516	3.8663	0.9761	1.2167	1.7447
undecenoylcarnitine (C11:1)				1.1937	0.8663	1.2684	2.6673	1.8921	2.373	3.8192	1.4864	3.4306	0.9342	1.3077	1	1.3143	3.3808	1.3136	0.4578	0.7363	0.8616	0.4578	0.4578	1.1004	0.6294	0.7716	0.6967	0.5626	0.5352	0.791	0.5677	0.4578	0.7254
uracil	66-22-8	C00106	HMDB0000300	1.2024	0.9591	0.9943	0.7731	1.4021	0.8253	1.1935	0.7875	1.0897	1.666	0.7533	0.6727	1.1386	0.6415	1.0107	2.1046	0.6889	1.0777	1.2973	1.2323	1.0057	0.668	0.9924	2.2312	0.6901	1.8597	0.7126	0.7601	0.6204	1.0966
urate	69-93-2;120K5305	C00366	HMDB0000289	1.0067	1.1384	1.119	0.7849	0.983	1.0186	0.9151	1.1254	1.2597	0.959	0.7712	0.7249	0.8401	0.6068	0.7498	0.8612	0.9933	1.208	1.1113	0.9169	1.3789	1.0894	1.2164	1.2681	0.6344	1.3521	1.0689	0.6346	0.5301	1.1015
urea	57-13-6	C00086	HMDB0000294	1.2857	1.2322	0.9352	0.9014	1.0099	0.7262	0.8612	0.7882	1.2137	1.2354	0.9901	0.861	0.9879	0.9414	1.1395	0.7818	1.1065	1.0706	1.0976	1.211	0.8466	0.8183	0.9685	1.2229	1.1777	1.0984	0.7129	1.1873	0.7127	1.0647
uridine	58-96-8	C00299	HMDB0000296	0.8763	1.0004	0.6607	1.1207	1.3309	1.3891	1.1599	1.0238	1.1046	1.0257	0.8797	0.9079	0.956	0.7649	0.8768	0.8826	0.9996	1.0298	1.1552	0.9435	1.2335	0.8892	1.0559	1.5546	0.8271	1.293	1.1269	0.7757	0.5931	0.9019
UMP	3387-36-8	C00105	HMDB0000288	0.1627	1.5247	0.1627	0.1627	0.4331	0.3884	0.1627	0.1627	0.1627	0.7846	0.4092	0.1627	0.1627	0.1627	0.2907	1.1448	0.9791	1.2621	1.1603	1.6135	0.9092	1.0209	0.5116	1.2086	0.471	1.073	1.7376	1.1458	0.571	1.2235
ursocholate	2955-27-3	C17644	HMDB0000917	1.499	0.4174	1.0537	2.2155	2.7255	1.3561	4.9332	1.4048	3.2701	0.9463	0.855	0.0554	0.8658	15.2473	1.5302	0.1049	0.6584	0.0554	0.1363	1.6685	4.9339	0.7122	0.2597	0.0554	0.1083	0.5496	0.7929	0.0554	0.0554	9.8206
ursodeoxycholate	128-13-2	C07880	HMDB0000946	1.8195	2.8132	2.6353	4.7452	0.6139	2.2234	5.1444	2.2844	1.7332	0.3828	0.2261	2.4942	3.2035	1.3838	1.1406	0.6231	0.1172	0.3654	0.1172	0.3103	1.8854	0.3396	1.2423	0.1417	0.1429	0.1609	0.8594	0.1172	0.5633	0.3154
valerylcarnitine (C5)	40225-14-7		HMDB0013128	0.3232	0.3232	0.3232	0.5386	1.9814	0.3232	1.0439	0.3232	0.4384	0.3232	0.3232	0.3232	0.3232	0.3232	0.3232	0.3232	0.3232	0.7515	0.8106	1.2192	0.3232	0.3232	1	1.3467	0.3232	1.7056	0.3232	0.3232	0.3232	0.3232
valerylglycine (C5)	24003-66-5		HMDB0000927	0.9027	1.7739	0.7013	1.7984	1.8022	0.5128	1.2735	0.738	0.9482	1.5532	1.7073	0.3291	0.6495	0.49	0.7394	0.523	1.3653	1.3345	1.5364	1.8505	1.0518	0.9266	1.9932	1.6378	0.7467	3.2379	0.8379	0.7808	0.7748	1.2391
valine	72-18-4	C00183	HMDB0000883	0.98	1.2256	0.9223	1.1539	1.1189	1.0456	0.8795	0.9872	0.901	1.2958	1.1046	0.9722	0.9547	0.8421	1.0689	0.7728	0.9029	1.0529	1.0019	1.1007	0.9141	0.9992	1.1228	1.0312	0.9254	1.1403	1.0823	1.0008	0.5967	0.9628
xanthine	69-89-6	C00385	HMDB0000292	1.1454	0.9909	1.0345	1.2087	1.0091	1.0941	1.2706	1.1207	1.2633	1.3331	0.8653	0.6557	1.0228	0.9005	0.8428	1.1213	0.5365	0.773	1.0583	0.8828	1.2078	0.8544	1.0772	1.0939	0.8185	0.9629	0.1522	0.7703	0.8503	0.7729
xanthosine	146-80-5	C01762	HMDB0000299	1.5134	0.8569	0.9878	0.657	1.0073	1.5639	1.3287	1.3309	2.1543	1.3702	0.481	0.4218	0.6727	0.1499	0.4751	0.9958	0.5997	1.0951	1.7341	1.2108	2.2625	1.0042	1.8914	2.7467	0.3397	2.5692	0.4573	0.3102	0.2576	0.7029
xanthurenate	59-007	C02470	HMDB0000881	0.9396	2.5976	0.336	0.2317	0.8436	0.2317	0.281	1.5083	0.5918	1.1837	1.9343	1.2885	0.9517	0.2317	0.6555	0.7485	2.4306	1.683	0.8074	2.0779	0.7211	1.0483	1.9338	2.0359	0.4138	2.3631	0.4168	1.3458	0.4417	2.7422
xylose	609-06-3	C00181	HMDB0000098	0.3609	4.316	2.1166	0.3609	0.3609	0.3609	0.3609	0.3609	1.4116	0.3609	0.3609	0.3609	0.3609	0.3609	0.4769	0.3609	0.6909	1	0.8142	1.206	0.9542	0.3609	0.3609	0.7998	0.3609	0.3609	1.6123	0.3609	0.3609	1.0463

## Sheet: Table S1b-liver
Supplementary Table S1b. Total Metabolites Identified in Liver of Slc13a5 Deficiency Mice
Liver				SAMPLE NAME	7436	7437	7438	7439	7440	7441	7442	7443	7444	7445	7446	7447	7448	7449	7450	7451	7452	7453	7454	7455	7456	7457	7458	7459	7460	7461	7462	7463	7464	7465	7466	7467
				GENDER	F	F	F	F	F	F	F	F	F	F	F	F	F	F	F	M	M	M	M	M	M	M	M	M	M	M	M	M	M	M	M	M
				GENOTYPE	Slc13a5 +/+	Slc13a5 +/+	Slc13a5 +/+	Slc13a5 +/+	Slc13a5 +/-	Slc13a5 +/-	Slc13a5 +/-	Slc13a5 +/-	Slc13a5 +/-	Slc13a5 -/-	Slc13a5 -/-	Slc13a5 -/-	Slc13a5 -/-	Slc13a5 -/-	Slc13a5 -/-	Slc13a5 +/+	Slc13a5 +/+	Slc13a5 +/+	Slc13a5 +/+	Slc13a5 +/+	Slc13a5 +/+	Slc13a5 +/-	Slc13a5 +/-	Slc13a5 +/-	Slc13a5 +/-	Slc13a5 +/-	Slc13a5 +/-	Slc13a5 -/-	Slc13a5 -/-	Slc13a5 -/-	Slc13a5 +/-	Slc13a5 -/-
BIOCHEMICAL	PUBCHEM	CAS	KEGG	Group HMDB	WT	WT	WT	WT	heterozygote	heterozygote	heterozygote	heterozygote	heterozygote	KO	KO	KO	KO	KO	KO	WT	WT	WT	WT	WT	WT	heterozygote	heterozygote	heterozygote	heterozygote	heterozygote	heterozygote	KO	KO	KO	heterozygote	KO
(14 or 15)-methylpalmitate (a17:0 or i17:0)	8181;17903417		C16995	HMDB0061859	0.9872	0.5873	0.664	0.1234	0.4639	0.3609	2.0087	5.2011	0.8185	1.0128	0.3009	0.8215	0.1255	0.9416	2.8786	2.7604	0.4725	0.6326	1.0229	1.176	0.8825	1.0586	3.0456	3.2223	0.7621	1.7106	0.7343	1.3117	2.704	2.9905	2.5124	4.3359
(16 or 17)-methylstearate (a19:0 or i19:0)	3083779	2724-59-6		HMDB0037397	0.901	0.647	0.5733	0.201	0.4335	0.3858	1.6677	3.7735	0.7809	0.8526	0.3784	0.7743	0.1874	0.7722	1.4818	2.2703	0.5886	0.6848	1.1773	1.2625	1.2255	1.099	2.7493	2.4013	0.8404	1.7486	0.8691	1.1641	2.2162	2.0204	1.883	3.9557
(3'-5')-adenylyladenosine*	94231				5.3802	0.4583	0.7293	1.6405	1.9432	0.4583	1.2373	1.1074	1	1.6566	1.8028	1.5053	0.9897	0.762	0.819	0.6672	0.4819	0.4583	0.62	0.4583	0.7636	0.9853	0.4583	0.4583	0.4583	2.6663	1.1514	3.8174	0.4583	0.4583	0.4583	0.7345
(3'-5')-adenylylcytidine	10875494	4833-63-0			4.0704	1.1595	0.8338	1.5265	2.4149	0.4775	1.5744	1.3264	0.8627	2.0557	2.2351	1.0594	0.8351	0.788	1	0.4594	0.8521	0.4594	0.7611	0.5586	0.6928	1.1618	0.4782	0.4594	0.57	1.7686	1.4573	2.4741	0.4594	0.4594	0.4594	0.6634
(3'-5')-adenylyluridine	145459093	3051-84-1			5.3778	0.9368	0.8922	1.5644	2.2766	0.4668	1.1244	0.8081	1.1189	2.0691	1.9266	1.3375	0.9027	1.0429	1.4933	0.5618	0.8368	0.3676	0.6069	0.3778	0.5256	1	0.3676	0.3676	0.6441	2.697	1.1488	3.2869	0.3676	0.3676	0.3676	0.5727
(3'-5')-uridylyluridine	145459105	2415-43-2			4.8692	1.0089	1.4872	1.0598	1.4373	0.6546	1.0382	0.8966	0.9315	1.457	1.7115	0.804	0.9484	0.9911	0.7606	1.321	1.3459	0.6546	0.8057	0.6546	1.0222	0.9335	0.8555	0.9397	0.6546	1.4233	0.6546	1.9754	0.6546	0.7504	0.6546	0.7605
(R)-3-hydroxybutyrylcarnitine	53481617			HMDB0013127	0.7456	1.1318	0.8396	0.7816	0.418	0.936	2.0537	1.1822	0.9275	0.9112	1.1418	0.546	0.8632	1.397	0.9914	0.7506	1.7613	1.4428	1.0061	1.5435	0.8584	1.3432	0.7844	0.9939	1.1983	1.7723	1.1691	0.627	1.1059	1.3105	0.6223	1.1447
(S)-3-hydroxybutyrylcarnitine	71464477			HMDB0013127	0.7955	1.2163	1.1108	0.5408	0.49	0.7832	1.1045	1.1059	1.4655	0.6513	1.1306	0.2929	1.1649	1.4463	1.1269	0.7647	0.9745	1.0255	0.9374	1.077	0.7043	0.6997	1.1705	0.718	1.1171	1.2277	0.7583	0.4718	0.7919	1.0633	1.0609	0.9728
1,2,3-benzenetriol sulfate (2)	54110629;92013662			HMDB0060018,HMDB0060016	0.787	0.299	1.4967	0.299	1.2099	0.299	0.6669	0.3522	0.299	0.7345	1.037	1.5169	1.4674	0.299	1	0.8749	0.706	0.299	1.0126	1.0259	0.299	0.299	0.3337	1.7109	0.299	2.6154	0.299	0.507	0.299	1.27	0.299	0.727
1,2-dilinoleoyl-GPC (18:2/18:2)	5288075	998-06-1		HMDB0008138	1.0189	0.9657	0.9803	1.275	0.6778	1.2101	1.0195	1.2607	0.9788	0.7762	0.7975	0.9219	1.2775	0.9708	1.0557	0.8826	0.9193	1.0287	0.8812	1.0768	1.5558	1.0876	1.1754	0.9212	0.9811	1.1496	1.2364	0.7782	1.2523	0.7809	0.7379	1.1918
1,2-dilinoleoyl-GPE (18:2/18:2)*	9546812			HMDB0009093	0.9301	1.0765	0.78	1.3884	0.6692	1.1645	0.9709	1.1567	0.849	0.8258	0.7131	1.0101	1.2513	0.9152	1.1176	0.9155	1.1232	1.1896	0.9982	1.1754	1.5304	0.9526	0.9665	0.9777	1.0018	1.4597	1.0535	0.7104	1.3739	0.9331	0.8617	1.2865
1,2-dipalmitoyl-GPC (16:0/16:0)	452110	63-89-8	D03585	HMDB0000564	1.1411	0.8587	0.8812	1.0229	0.9916	1.0234	1.0991	1.1286	1.2571	1.2044	1.0084	1.0194	1.1778	1.0818	1.2638	0.9555	0.9539	0.8796	0.9288	0.9183	1.2085	0.9634	0.8916	0.9883	1.0436	1.0473	0.9674	1.1458	0.9064	0.9177	0.9554	0.7973
1,2-dipalmitoyl-GPE (16:0/16:0)*	445468			HMDB0008923	2.0894	0.7775	0.772	0.6024	1.1061	0.6755	0.9321	1.368	1.5876	1.8056	0.8764	0.6546	1.1242	1.1128	2.0015	0.9275	0.9282	0.9744	1.2115	0.7242	0.903	0.6812	0.8896	1.591	1.262	1.2758	0.701	1.2851	0.7281	1.3449	1.4872	1.0256
1,5-anhydroglucitol (1,5-AG)	64960	154-58-5	C07326	HMDB0002712	1.022	0.9445	1.0727	1.2674	1.3879	1.2272	1.2963	1.2253	1.1952	1.2061	1.0946	1.4115	1.1765	1.0216	1.2535	0.5447	0.8794	0.7496	1.0051	1.0342	0.6334	0.9425	0.8405	0.738	0.7862	0.7298	0.9949	0.4933	0.889	0.8586	0.5463	0.9381
1-(1-enyl-oleoyl)-GPE (P-18:1)*					1.069	0.8265	1.1136	1.021	1.4653	0.6579	0.5975	1.0178	0.9758	1.6212	0.9416	1.0034	0.8457	0.7767	1.1658	1.7867	1	1.036	1.0428	0.6615	1.1339	0.5975	0.8116	1.0582	0.7166	1.219	0.7303	1.2163	0.8659	0.8573	0.6681	0.8936
1-(1-enyl-palmitoyl)-2-arachidonoyl-GPE (P-16:0/20:4)*	52925126			HMDB0011352	0.9127	0.9636	0.7422	0.8631	1.0082	0.767	0.8329	1.1558	1.1191	1.1104	0.8808	0.8629	1.0979	1.0492	1.1195	1.2163	1.0493	0.9741	1.0082	0.9525	1.015	1.0129	0.9141	0.9312	1.1062	1.0695	0.8718	1.1564	1.0538	0.8563	0.9918	0.9177
1-(1-enyl-palmitoyl)-2-linoleoyl-GPE (P-16:0/18:2)*	52925127			HMDB0011343	0.5099	1.3306	0.5099	0.5099	0.9643	0.5099	0.5099	0.8452	1.0282	1.3299	0.7957	0.5099	0.9539	0.878	0.9035	1.2293	1.407	0.9967	1.0247	1.2285	1.4273	0.9803	0.7149	1.0434	0.8027	1.2138	0.5584	1.7078	1.2294	0.5427	1	1.2406
1-(1-enyl-palmitoyl)-2-palmitoyl-GPC (P-16:0/16:0)*	11146967			HMDB0011206	1.1222	0.9582	0.8852	1.1705	1.1028	1.066	1.0196	1.3944	1.3333	1.0057	0.8342	1.046	0.9937	1.0351	1.2518	0.862	1.1238	0.9292	0.8674	1.0957	0.9632	0.888	0.8487	1.081	1.1642	0.8651	0.8472	0.9943	1.045	0.7307	0.9009	0.9803
1-(1-enyl-palmitoyl)-GPE (P-16:0)*				HMDB0011152	1.105	0.8328	0.864	0.9836	1.4672	0.9198	0.9688	1.2823	0.9707	1.1571	1.1284	1.1218	0.9315	1.0188	1.2915	1.5893	1.0707	1.2444	0.8755	0.8208	1.0164	0.9764	0.9404	0.9314	1.2108	1.1193	0.8313	1.1899	0.8798	0.7198	0.7087	1.0203
1-(1-enyl-stearoyl)-2-arachidonoyl-GPE (P-18:0/20:4)*	9547058			HMDB0005779	1.0863	0.791	0.9033	1.0093	1.3213	0.8549	1.2201	1.6152	1.4579	1.3451	1.021	0.9067	1.0179	1.0883	1.4846	0.9371	1.1381	0.8972	0.9035	0.855	0.9557	0.9907	0.8625	1.1377	1.0224	1.1059	0.8036	0.9614	1.0344	0.8496	0.9482	0.7964
1-(1-enyl-stearoyl)-2-linoleoyl-GPE (P-18:0/18:2)*				HMDB0011376	0.9463	0.8804	0.6639	0.6505	1.1624	0.7173	0.7543	1.5033	1.2886	4.7944	0.7446	0.6851	1.0205	0.7665	1.2782	1.2773	1.1982	0.9672	1.0929	0.8265	0.7662	0.9909	0.798	1.256	1.2515	1.1123	0.7222	1.0357	1.2058	0.6894	1.0091	1.0415
1-(1-enyl-stearoyl)-GPE (P-18:0)*					1.0116	0.7679	0.7656	1.1046	1.2733	0.8774	0.9021	1.2744	0.9903	1.1302	1.044	1.0097	1.1012	1.0133	1.3365	1.2975	0.8366	1.0745	0.7681	0.9086	1.1714	0.8566	0.7939	0.8868	0.795	1.0728	0.9152	1.0323	1.0976	0.7219	0.8129	0.8764
1-arachidonoyl-GPC* (20:4)*	24779476		C05208	HMDB0010395	1.289	0.9224	1.2338	1.3491	1.805	0.9015	1.1755	1.2165	1.0492	1.4193	1.8915	0.9669	1.0281	0.9438	1.2092	0.7716	0.934	1	1.1129	0.8367	1.0526	0.8868	0.501	0.6938	1.1452	0.9604	0.9894	0.6378	0.7413	1.0412	0.501	0.9376
1-arachidonoyl-GPE (20:4n6)*	42607465			HMDB0011517	1.2408	1.1114	1.0934	1.175	1.5108	0.8257	0.947	1.0837	0.9746	1.3638	1.4561	0.8787	0.8771	0.9473	1.0065	0.743	0.9961	1.0492	1.1055	0.8929	0.9883	1.0039	0.7596	0.8581	1.1647	1.0878	0.9804	0.5585	0.9417	1.0253	0.7563	1.1574
1-arachidonoyl-GPI* (20:4)*	121596217			HMDB0061690	1.1924	0.6206	0.9629	0.3346	0.6895	0.5067	1.5756	2.4324	0.8602	1.0074	0.4949	0.9374	0.254	0.8455	1.5576	1.8546	0.6074	0.8144	0.9926	1.0753	0.7923	1.1503	1.6878	2.3525	0.843	1.0588	0.7553	1.1955	1.4542	1.9152	1.4029	2.3409
1-arachidonylglycerol (20:4)	16019980;5282281	35474-99-8	C13857	HMDB11578	1.2207	0.4551	0.8494	0.1365	0.592	0.4135	2.1679	4.9141	1.0551	1.722	0.3228	0.6102	0.0753	0.9101	2.0634	2.3591	0.464	0.6489	1.1457	0.9449	0.7762	1.1861	3.2998	4.1911	0.8574	1.8532	0.5761	0.8721	2.8157	2.4115	1.5719	3.8566
1-carboxyethylhistidine	53990435				1.0709	0.9089	1.0541	0.4796	1.029	0.6617	0.8844	0.8272	0.8195	1.2736	0.9278	0.8372	0.6758	0.7439	0.9386	1.144	1.336	1.5549	1.6322	1.1702	1.0612	0.9052	0.971	1.4657	1.1392	1.1205	1.2479	0.8533	0.7069	1.1063	0.7193	1.0697
1-carboxyethylisoleucine					1.3804	0.7897	1.1806	0.9852	1.0602	0.6699	0.8679	1.4213	0.9125	1.2869	1.1788	0.5925	0.7357	0.7445	0.9476	1.1876	1.2827	1.591	1.1299	1.1398	0.8899	1.7001	0.9849	0.8835	1.0632	1.0072	2.4454	0.8307	0.797	0.9928	0.5597	1.8001
1-carboxyethylleucine					1.3561	0.8641	1.0036	0.8219	1.4154	0.5555	0.8491	1.2353	0.8899	1.2058	1.2821	0.8065	0.5523	0.5983	0.9739	0.7294	1.4965	1.4979	1.406	1.0358	0.8436	1.313	0.7304	1.0413	0.9964	0.823	1.3935	1.0496	0.694	1.2409	0.4461	1.0982
1-carboxyethylphenylalanine	59100900				1.5351	0.8362	1.0584	0.6855	1.1849	0.5738	0.8595	1.0171	0.7577	1.1573	1.1616	0.6534	0.7097	0.7094	1.0489	0.8911	1.2999	1.2082	1.2043	1.0106	0.7907	1.0955	0.6709	1.0611	0.9341	0.725	1.3764	0.999	0.5671	1.001	0.4669	1.0287
1-carboxyethyltyrosine					1.6853	0.7786	0.9355	0.6158	1.3499	0.6676	0.9421	0.9286	0.9051	1.2552	1.097	0.8019	0.7476	0.8085	1.0453	0.9853	1.2229	1.3515	1.1682	1.1249	0.8994	1.1608	0.7609	1.1119	1.0232	1.0326	1.5985	0.934	0.5722	1.0449	0.5449	1.0147
1-carboxyethylvaline					1.22	0.8461	1.2606	0.8967	1.1459	0.6559	0.8642	1.3481	0.918	1.1409	1.1788	0.582	0.7098	0.6953	0.8273	1.0072	1.0759	1.3978	1.1872	1.1346	0.8442	1.5849	1.1134	0.935	0.921	1.0531	2.2824	0.8745	0.8258	0.9928	0.5432	1.7222
1-dihomo-linolenylglycerol (20:3)					1.0052	0.4969	0.7111	0.1357	0.5383	0.4136	1.4388	3.9782	0.8742	1.2345	0.3576	0.5217	0.0862	0.7835	1.6136	1.9369	0.571	0.8598	1.1604	1.2751	0.9948	1.1781	2.8824	3.2319	0.9049	1.9778	0.5881	0.6943	3.2318	2.2845	1.7149	3.4293
1-dihomo-linoleoylglycerol (20:2)					1.1703	0.7277	0.7496	0.1427	0.2667	0.2157	1.2731	4.6038	1.1498	1.0278	0.311	0.3145	0.0654	1.2008	1.609	1.5716	0.4718	1.1766	0.5663	0.6421	1.13	0.8123	1.5343	3.162	0.4561	0.9722	0.4324	0.3248	3.5262	1.746	1.5145	2.1146
1-docosahexaenoylglycerol (22:6)	53480995			HMDB0011587	0.9982	0.3492	0.7427	0.13	0.4091	0.4321	3.1647	5.6241	1.1587	1.6425	0.2574	0.6222	0.0578	1.0018	2.6952	2.6628	0.3929	0.5751	0.9214	0.9884	1.0288	1.6121	3.7823	4.0779	0.8421	1.3504	0.5554	0.826	3.6927	2.9149	1.5723	4.0415
1-eicosapentaenoylglycerol (20:5)*	53480988			HMDB11580	1.4235	0.4247	0.9492	0.1921	0.5263	0.648	2.2393	4.999	0.9913	1.1986	0.2169	0.6796	0.1921	0.9057	3.056	1.7657	0.1921	0.6563	0.1921	0.8828	0.881	1.0087	3.0658	3.3869	0.9466	1.296	0.3117	0.1921	2.973	2.6972	1.4066	4.759
1-heptadecenoylglycerol (17:1)*					1.0288	0.7282	0.9023	0.4234	0.4519	0.4899	1.4118	4.3691	1.0265	0.8771	0.4234	0.5661	0.4234	0.8006	1.6221	1.8609	0.4505	0.9017	1.035	1.0841	0.6541	0.9111	3.0162	2.6374	0.9735	1.3501	0.5745	0.5729	2.5953	2.0037	2.0976	4.0514
1-lignoceroyl-GPC (24:0)	24779481	325171-59-3		HMDB0010405	1.0294	0.8395	0.953	0.9801	0.9296	0.774	1.4091	0.9546	1.0775	1.2211	1.0933	1.0079	0.9125	0.9093	1.2572	0.8647	0.9774	1.1752	1.1675	0.9641	1.164	1.264	0.8808	1.17	1.2297	1.1196	1.0771	1.0646	0.9643	0.8994	0.9921	0.9711
1-linolenoyl-GPC (18:3)*			C04100	HMDB0010388	1.0248	0.5748	0.7876	0.1823	0.4042	0.4291	1.5517	2.9691	0.7212	0.8633	0.2386	0.7745	0.1345	0.832	2.0958	1.7754	0.5758	0.6856	1.2061	1.1666	0.9752	1.2028	3.3205	2.5732	0.8534	1.4525	0.7363	1.1276	2.0441	2.1932	1.3632	3.6623
1-linolenoyl-GPG (18:3)*					0.9053	0.594	0.5882	0.6029	0.8616	0.6403	1.1865	2.6254	0.6227	1.0106	0.6085	1.0511	0.4143	1.0485	3.2384	1.2268	0.5818	0.8344	0.9885	1.1667	0.879	0.9894	1.9824	1.5901	1.264	0.7335	0.7324	1.9679	1.1005	1.6122	1.1294	3.7815
1-linolenoylglycerol (18:3)	53480978	124151-74-2		HMDB0011569	1.0273	0.6446	0.735	0.2104	0.6061	0.7874	2.4553	5.712	0.9889	1.1329	0.3524	0.9769	0.1003	1.0561	1.7152	1.508	0.4363	0.9499	0.6322	1.0111	0.7782	1.3979	3.1891	2.6227	0.852	1.3094	0.6776	0.9638	2.9108	2.2854	1.4162	4.9361
1-linoleoyl-2-arachidonoyl-GPC (18:2/20:4n6)*	24778979		C05208	HMDB0008147	1.127	0.9512	1.1019	0.9759	0.7532	1.0686	1.0898	1.1894	0.996	0.8884	0.886	0.8896	1.0406	0.8457	1.0481	0.7225	1.004	0.9872	1.0507	1.0882	1.1541	0.881	1.1414	1.0365	0.9263	1.2467	1.1553	0.7268	0.938	0.8749	0.7614	1.0935
1-linoleoyl-2-arachidonoyl-GPE (18:2/20:4)*	348279332			HMDB0009102	1.194	1.0107	1.0708	1.0396	0.7906	0.9893	0.966	1.204	1.1959	0.9176	0.6905	0.8044	1.2234	0.8666	1.0652	0.8638	0.9137	1.0744	0.9305	1.0206	1.2905	0.8474	0.9488	1.0348	1.0412	1.2851	1.062	0.7524	0.9754	0.7599	0.8493	1.1961
1-linoleoyl-2-linolenoyl-GPC (18:2/18:3)*	52922731			HMDB0008141	0.7212	0.987	0.8714	1.4137	0.6292	1.0582	1.1759	1.1684	0.8658	0.7559	0.9234	0.9437	1.1889	1.2915	1.1453	0.6836	0.9188	0.9439	0.6133	1.0314	1.8423	1.1226	0.9351	0.5926	1.0945	1.2927	1.5105	1.013	1.0477	0.6863	0.5447	1.5078
1-linoleoyl-GPC (18:2)	11988421		C04100	HMDB0010386	0.9425	1.104	0.9957	1.3702	1.5307	0.9041	0.9296	1.1167	0.6449	1.1331	1.5132	0.9545	0.889	0.8996	0.9883	0.8884	1.0227	1.0725	1.1733	0.9502	0.8646	1.1513	1.1198	0.7239	1.0419	1.1283	1.1447	0.7204	0.7579	1.0043	0.4263	1.0549
1-linoleoyl-GPE (18:2)*	52925130			HMDB0011507	1.0115	1.1026	0.8467	1.4104	1.6092	1.0058	0.9746	1.1881	0.8021	1.224	0.7182	1.0159	1.0352	1.0209	0.9942	0.5436	0.9463	1.1339	0.9853	1.0233	0.9633	0.8361	0.665	0.8423	1.0711	1.3157	1.0397	0.6554	0.9603	0.9352	0.6357	1.4029
1-linoleoyl-GPG (18:2)*					0.9612	0.5054	0.6461	0.2597	0.542	0.4874	1.5229	3.2434	0.7726	1.0613	0.3808	0.9287	0.2177	1.029	2.4705	1.7999	0.501	0.6641	0.971	1.0316	1.0637	1.1766	1.8966	2.3925	0.9702	0.9593	0.6682	1.5969	1.634	2.3365	1.3997	3.1588
1-linoleoyl-GPI* (18:2)*	11124828				0.7593	0.8691	0.5612	0.2484	0.4777	0.4886	1.2506	2.5641	0.5977	0.7442	0.3079	0.4781	0.2202	0.7448	1.3897	2.0098	0.7626	0.9622	1.4018	1.3831	1.425	1.0378	2.5479	2.2207	0.7378	1.6405	1.2869	0.5867	2.3915	1.7757	1.1332	4.5407
1-linoleoyl-GPS (18:2)*					1.1221	0.6998	0.9055	0.3106	0.6864	0.5082	1.7123	3.4757	1.1325	1.2663	0.5532	0.7622	0.2618	1.0936	1.8964	1.9443	0.4507	0.6107	0.9666	1.0321	0.7997	0.8462	1.9035	1.9538	0.8322	1.3867	0.5578	0.9679	1.6695	1.5382	1.273	2.9203
1-linoleoylglycerol (18:2)	5283469	2277-28-3		HMDB0011568	0.9078	0.4903	0.7789	0.1803	0.5342	0.5985	3.3443	8.2404	1.0922	1.3376	0.4776	0.8659	0.0841	1.1015	2.1132	2.2082	0.429	0.7661	0.7135	1.1246	0.8743	1.7076	3.4521	3.9641	0.8045	1.9617	0.609	0.7396	4.3353	3.3965	1.6995	5.924
1-methyl-4-imidazoleacetate	75810	2625-49-2	C05828	HMDB0002820	1.1925	0.8518	1.0898	1.0804	0.9998	0.8262	0.9819	0.7583	1.523	1.1429	0.9175	0.9873	1.2034	1.0495	1.0002	0.7989	1.1331	1.2196	0.7223	0.6673	0.7551	1.1644	0.9675	0.7792	1.3042	0.5566	1.0047	1.5576	1.0313	0.7828	0.6961	1.066
1-methyl-5-imidazoleacetate	6451814	4200-48-0		HMDB04988	1.4707	1.1367	1.0269	0.369	0.8991	0.5387	1.4185	1.8404	2.4394	1.0097	1.1013	0.605	1.0497	0.9093	0.9086	1.1168	2.2409	1.7404	0.8379	0.7169	0.825	0.9903	0.9147	1.4205	0.8162	0.8188	0.9762	1.3616	0.6172	1.172	0.9055	2.1422
1-methylhistamine	3614	501-75-7	C05127	HMDB0000898	1.2006	1.1233	1.2456	1.4782	0.932	1.244	1.6897	5.4351	1.4297	0.9317	1.0394	0.7378	1.4153	0.9606	0.8857	0.7597	0.7155	1.4183	0.6036	0.4752	1.6593	1.0586	0.9341	0.7454	0.9561	0.949	1.0527	0.9202	1.1218	0.5862	0.9127	1.4661
1-methylhistidine	92105	332-80-9	C01152	HMDB0000001	0.9839	1.5232	0.8624	1.166	0.9764	0.8551	1.0859	0.8591	0.9969	1.0031	0.7679	1.0486	1.1833	0.7944	0.7568	0.9621	0.9723	1.1538	1.0623	1.3068	1.0324	1.6918	0.8752	0.64	1.3603	0.9566	1.2666	2.1206	0.7852	1.1047	0.7701	1.2935
1-methylnicotinamide	457	1005-24-9	C02918	HMDB0000699	0.9984	1.3677	2.3715	1.8106	0.3641	1.9618	0.9065	1.0659	1.4868	0.6692	1.1803	0.9716	1.855	1.0301	1.5233	1.0016	0.5606	0.608	0.4686	0.4094	0.9909	0.9494	1.1653	0.5022	1.0446	0.5462	0.8029	1.087	2.4069	0.5297	1.2375	0.6661
1-myristoyl-2-arachidonoyl-GPC (14:0/20:4)*	24778634			HMDB0007883	1.2485	0.9293	1.1948	0.9411	1.0543	0.8149	0.9526	1.1169	1.0753	1.1117	1.0636	0.5841	1.0265	1.1168	1.1804	0.6744	0.7977	1.0907	1.3644	0.9735	0.8285	0.6781	1.1884	0.9163	0.8811	1.1592	1.1907	0.7371	0.581	0.9453	0.8161	1.0948
1-myristoyl-2-palmitoyl-GPC (14:0/16:0)	129657	69525-80-0		HMDB0007869	1.5714	1.0017	1.0272	1.1233	1.2329	0.9198	0.8952	1.034	1.2083	1.5859	1.0346	0.9664	0.9497	1.1497	1.5348	0.8274	0.9506	0.9983	1.121	0.8845	0.8508	0.6405	0.7942	0.9693	1.0287	1.075	0.7917	1.188	0.7353	0.9159	1.049	0.8092
1-myristoylglycerol (14:0)	10957631	75685-84-6	C01885	HMDB0011561	1.5558	0.6255	1.0156	0.175	0.5105	0.5307	1.8934	5.5269	1.2334	1.0838	0.3179	0.6807	0.308	0.9245	1.9267	1.7981	0.322	0.9781	0.9844	0.8793	0.4378	0.7996	2.7128	2.9781	1.0757	1.8238	0.546	0.8863	1.8289	2.581	2.4263	3.8974
1-oleoyl-2-arachidonoyl-GPE (18:1/20:4)*	348281223			HMDB0009069	1.1559	0.9544	1.0492	0.9006	0.9787	0.8236	0.9395	1.3765	1.2613	0.9244	0.8811	0.7222	1.0664	1.0101	1.0538	1.0017	0.9741	1.0404	0.9983	1.02	1.0251	0.9517	0.9241	1.1016	1.1835	1.0254	0.9383	0.828	0.9013	0.8789	1.0246	1.0762
1-oleoyl-2-arachidonoyl-GPI (18:1/20:4)*					0.9945	1.0957	0.906	0.87	0.6563	0.885	0.7335	0.9617	1.2431	0.8272	0.6759	0.8072	1.0055	0.8011	0.8165	0.9414	1.0587	1.1692	1.1166	1.2146	1.2334	1.0154	1.1867	1.0324	1.1152	1.3562	1.3226	0.9453	1.3703	0.7314	0.8681	1.1712
1-oleoyl-2-docosahexaenoyl-GPC (18:1/22:6)*	24778955			HMDB0008123	1.2396	0.9496	1.2384	1.0042	0.9923	1.0428	1.0433	1.3524	1.1969	0.9988	0.9921	0.8004	1.0391	0.959	1.0378	0.926	0.9187	0.9353	1.0012	1.0502	0.9759	0.8325	0.9191	1.0532	1.0994	1.0436	0.9759	0.8249	0.8968	0.9438	1.0322	1.0586
1-oleoyl-2-docosahexaenoyl-GPE (18:1/22:6)*	52922113			HMDB0009078	1.0814	0.887	1.0023	0.9824	0.9449	0.7695	1.0136	1.1955	1.1234	0.8511	0.8534	0.7627	1.0703	0.9926	0.854	1.1077	1.0152	0.973	1.0039	1.0852	1.0375	1.0885	0.8517	1.0519	1.1129	1.0671	0.9977	0.7412	0.7673	0.974	1.0098	0.9739
1-oleoyl-2-linoleoyl-GPC (18:1/18:2)*	24778939			HMDB0008105	1.2995	1.052	1.7744	1.3075	0.9281	1.3175	1.0158	1.5864	1.4699	0.9859	1.1065	0.89	1.3634	1.0141	1.0685	0.89	0.7485	0.7901	0.7911	0.781	0.9809	0.6983	0.8189	0.8774	0.9188	0.8807	1.0804	0.7566	1.1469	0.7951	1.121	1.0893
1-oleoyl-2-linoleoyl-GPE (18:1/18:2)*	9546753			HMDB0005349	0.881	1.0406	0.7516	0.923	0.8011	0.8493	0.7251	1.1407	0.967	0.8805	0.6736	0.715	1.0926	0.9513	1.0208	1.0922	1.0012	1.0744	1.0401	1.1606	1.1976	0.9626	1.0112	0.9988	1.0665	1.2287	1.055	0.5928	1.1323	0.8562	0.9531	1.2498
1-oleoyl-2-linoleoyl-GPI (18:1/18:2)*	52928384			HMDB0009838	0.8252	1.3351	0.7209	0.9361	0.6702	1.4504	1	1.555	1.1229	0.9651	0.7408	0.5635	1.2538	0.9397	1.4644	0.9188	0.9945	1.1005	1.0058	1.3167	1.7699	0.7237	1.378	0.7982	0.8928	1.4645	2.2643	0.5635	1.5371	0.7163	0.743	1.5669
1-oleoyl-GPC (18:1)	16081932	19420-56-5	C03916	HMDB0002815	1.4807	1.1621	1.3803	0.9612	1.3495	0.8045	0.8769	1.2687	0.9874	1.1369	1.2788	0.7017	0.8777	0.9196	1.052	0.7557	1.009	1.2133	1.3464	1.0479	0.8621	0.9735	0.8624	0.991	1.1076	1.0845	1.1901	0.7714	0.6386	0.9756	0.7154	1.1685
1-oleoyl-GPE (18:1)	9547071	89576-29-4		HMDB0011506	1.5489	1.0382	1.2125	0.8644	1.1381	0.7117	0.8603	1.216	0.9207	1.0474	1.0735	0.7603	0.9586	0.8999	0.9954	0.9945	0.9915	1.0605	1.1603	1.0121	1.0195	0.9757	0.8441	1.0046	1.0207	1.1417	1.137	0.6838	0.6767	0.941	0.7559	1.1032
1-oleoyl-GPG (18:1)*					1.0471	0.6178	0.9307	0.1266	0.5045	0.323	0.9727	2.4437	0.8954	1.0273	0.3453	0.6945	0.1046	0.8908	1.7298	2.1835	0.4575	0.6567	1.2967	1.1374	0.7917	1.1395	1.7493	2.3115	1.0372	0.9139	0.6267	2.0465	1.569	2.0856	1.895	2.4271
1-oleoyl-GPI (18:1)	86289645			HMDB0061693	1.3604	0.5267	0.7595	0.102	0.342	0.3536	1.4306	1.8475	0.8948	1.0746	0.2241	0.6086	0.1169	0.6921	1.612	2.3196	0.6539	0.754	1.2146	1.3181	1.1244	0.8201	2.1323	2.4091	0.6847	1.1773	0.884	0.9278	1.8136	1.5535	1.0722	2.5727
1-oleoyl-GPS (18:1)	85036846	326589-90-6		HMDB0061694	1.189	0.5783	1.2482	0.1324	0.3661	0.3329	1.115	2.8441	1.1897	1.1144	0.3552	0.4414	0.1484	0.7378	1.2025	2.4287	0.3082	0.5873	1.1128	0.8916	0.8426	0.7105	1.8123	1.659	0.676	1.0051	0.4799	0.9949	1.3443	1.1738	1.6888	1.8952
1-oleoylglycerol (18:1)	5283468	111-03-5		HMDB0011567	1.1575	0.6142	0.9999	0.1474	0.5318	0.4911	1.5744	7.5225	1.1964	1.1405	0.4098	0.536	0.0761	0.9368	1.5283	2.1881	0.4811	1.12	0.8006	1.0001	0.6339	0.9985	2.6498	3.9929	0.9056	1.5976	0.5426	0.6514	3.315	2.8416	2.4964	3.9413
1-palmitoleoyl-2-linolenoyl-GPC (16:1/18:3)*	52922452			HMDB0008008	0.877	1.5518	0.9121	1.1999	0.8491	1.1527	0.9664	0.9927	0.9226	0.5394	0.8103	0.941	0.9168	0.9826	0.8859	0.8768	1.3256	1.3386	1.0073	1.5433	1.0886	1.1718	2.0092	1.0662	1.2755	1.3123	1.6017	0.8605	1.057	0.8544	0.9004	1.8627
1-palmitoleoyl-2-linoleoyl-GPC (16:1/18:2)*	24778768			HMDB0008006	0.7803	1.2126	0.8856	0.8873	0.776	0.9653	0.6877	1.1803	0.9779	0.5694	0.8764	0.6133	1.0003	1.0143	0.8762	0.9997	1.1643	1.2338	0.9501	1.3522	1.0662	1.0429	1.4619	1.0374	1.1043	1.1422	1.2733	0.8308	0.9766	0.8873	1.0116	1.5382
1-palmitoleoyl-GPC* (16:1)*	24779461			HMDB0010383	1.1092	1.4192	1.0701	0.8053	1.1573	0.8342	0.624	0.9757	0.8489	0.7294	1.1572	0.6441	0.84	0.762	0.7387	0.8357	1.1635	1.4033	1.3945	1.3171	0.8479	0.9562	1.3037	1.0443	1.0452	1.1879	1.6218	0.7509	0.6591	1.0243	0.7147	1.5206
1-palmitoleoylglycerol (16:1)*					1.0829	0.9266	0.7566	0.1169	0.4379	0.727	1.3132	4.5704	0.8953	0.7475	0.2847	0.6991	0.0763	0.6178	1.1081	2.4377	0.44	1.1701	1.001	1.3268	0.4532	1	5.3753	3.1815	1	1.3663	0.6625	0.8471	2.2719	2.3507	2.3567	6.0754
1-palmitoyl-2-arachidonoyl-glycosyl-GPE (16:0/20:4)					1.0117	1.2917	0.8526	1.1965	0.7471	1.1335	1.0413	0.7071	0.7959	0.4905	1.0317	1.4985	0.9883	0.8724	0.8667	0.6534	1.1115	1.2407	0.9514	0.9811	1.1045	1.2968	0.8987	0.7957	1.1984	1.11	2.0155	1.0698	0.924	0.9444	0.6263	1.1612
1-palmitoyl-2-arachidonoyl-GPC (16:0/20:4n6)	10747814	35418-58-7	C05208	HMDB0007982	0.9531	0.9945	0.9385	0.9717	0.9668	0.9885	1.1299	0.9404	0.9559	0.9894	0.9125	1.0774	1.1006	1.0055	0.9625	1.0501	1.019	1.0253	1.1172	1.0673	1.1152	1.0955	1.0208	1.0209	1.0641	1.0832	1.0713	0.9703	0.9096	0.9741	0.905	0.9917
1-palmitoyl-2-arachidonoyl-GPE (16:0/20:4)*	9546800		C05210	HMDB0005323	0.9554	1.011	0.7688	0.7359	0.8493	0.7294	0.9022	1.0344	1.0415	0.879	0.7627	0.7724	0.8573	0.8054	1.0169	0.9295	1.101	1.0275	1.0011	1.0473	1.0111	1.0258	1.0292	1.1312	1.0688	1.111	0.8848	0.9989	1.0656	0.8365	0.9472	1.0775
1-palmitoyl-2-arachidonoyl-GPI (16:0/20:4)*				HMDB0009789	0.9049	1.4019	0.7647	0.7645	0.9058	0.7396	0.9002	0.8687	0.9779	0.8677	0.7325	1.0004	0.8392	0.8004	1.2022	0.915	1.4133	1.291	1.1079	1.265	1.1105	1.2406	1.2522	1.1934	1.1942	1.3888	0.9819	1.1545	1.4699	0.9467	0.9996	1.1387
1-palmitoyl-2-arachidonoyl-GPS (16:0/20:4)		474943-16-3			0.8107	1.1345	0.6004	0.7933	0.8911	0.7808	0.8059	0.8874	1.0397	0.9821	0.9157	0.7022	1.0319	0.9487	0.9324	0.7494	1.2327	1.3497	1.2262	1.2237	1.2189	1.2282	0.9483	1.1476	1.0179	1.5159	1.1814	1.0746	1.1236	1.1652	0.9723	0.8318
1-palmitoyl-2-dihomo-linolenoyl-GPC (16:0/20:3n3 or 6)*					0.9348	1.1011	0.8441	0.7885	0.8133	0.8931	0.8314	0.9986	0.8664	0.7939	0.8361	0.8213	0.8822	0.7968	1.0014	1.0588	1.022	1.2711	1.185	1.2936	1.1815	1.0382	1.4161	1.103	0.9648	1.0918	1.0683	0.9461	1.0312	0.9133	1.0063	1.0933
1-palmitoyl-2-docosahexaenoyl-glycosyl-GPE (16:0/22:6)					1.0669	0.9739	0.936	1.5642	0.9219	1.2312	1.3463	0.8686	0.8687	0.6344	1.3742	1.7218	1.0097	1.0761	1.0506	0.5503	1.0728	0.9945	0.7439	0.901	0.8931	1.231	0.716	0.8619	1.1672	1.0055	1.6466	1.1766	0.8038	1.052	0.6102	0.9116
1-palmitoyl-2-docosahexaenoyl-GPC (16:0/22:6)	6441886	59403-54-2		HMDB0007991	0.9146	0.9337	0.806	1.035	0.9878	1.0655	1.1254	0.9604	0.954	0.9861	0.9296	1.0691	1.0461	0.9676	1.0812	0.8957	1.0279	0.9381	0.9849	1.0577	1.0627	1.1239	1.0412	1.0626	1.0432	1.0527	0.9734	1.0319	0.9681	1.0122	0.8856	0.9541
1-palmitoyl-2-docosahexaenoyl-GPE (16:0/22:6)*	9546799			HMDB0008946	0.9784	0.9567	0.7749	0.9328	0.974	0.7979	1.1696	1.0157	1.0319	1.0553	0.8826	0.9775	0.977	0.9934	1.1411	0.9644	1.2204	0.9591	1.0026	1.0347	1.0451	1.1476	0.9829	1.2582	1.1196	1.2142	0.9278	1.0814	1.0321	1.0265	0.9974	0.932
1-palmitoyl-2-gamma-linolenoyl-GPC (16:0/18:3n6)*	24778699			HMDB0007974	0.8977	1.1228	0.6691	0.9001	1.0083	0.885	1.0355	0.7223	0.7001	0.7758	0.7424	0.9917	0.8622	0.782	0.8016	0.9015	1.2354	1.0732	1.1994	1.1836	0.8336	1.379	1.6839	1.2789	1.1662	1.2137	0.973	1.1852	1.0964	1.025	0.8439	1.3681
1-palmitoyl-2-linoleoyl-glycosyl-GPE (16:0/18:2)					0.7199	1.1779	0.6052	1.0502	0.6607	1.2538	1.0381	0.6858	0.5767	0.4257	1.0355	1.5967	0.8831	0.7402	0.7907	0.6113	1.1441	1.1479	0.7918	1.094	1.0733	1.3645	0.8134	0.8152	1.22	1.2215	1.7866	0.9946	0.6987	1.0054	0.6259	1.1452
1-palmitoyl-2-linoleoyl-GPC (16:0/18:2)	5287971	40811-94-7		HMDB0007973	0.8276	1.0208	0.7475	0.9328	0.8809	0.9138	0.9838	0.8985	0.8019	0.8792	0.897	0.9904	0.9913	0.9497	0.998	1.0336	1.087	1.0115	1.0779	1.1502	1.0964	1.2158	1.0883	1.0067	1.0927	1.1325	1.0382	1.002	0.9897	1.0295	0.947	1.0781
1-palmitoyl-2-linoleoyl-GPE (16:0/18:2)	9546747			HMDB0005322	0.7489	1.3444	0.5224	0.6423	0.8002	0.6578	0.7277	0.8777	0.7959	0.865	0.6696	0.7814	0.8291	0.8125	0.9875	1.1655	1.4581	1.1921	1.1498	1.3885	1.1265	1.2092	1.1296	1.2214	1.2119	1.5431	0.9792	0.9392	1.1596	1.0125	1.0646	1.4622
1-palmitoyl-2-linoleoyl-GPG (16:0/18:2)	52927246	322647-44-9		HMDB0010575	0.7538	1.0008	0.7403	1.0906	0.8576	0.9992	0.9869	0.7835	0.874	0.9237	0.7478	1.0816	1.0311	0.851	1.3122	0.8285	1.0752	1.0899	1.0786	1.0262	1.2158	1.2515	1.1221	0.9287	1.0691	1.0655	1.1664	0.8824	1.2525	0.8182	0.6429	0.8542
1-palmitoyl-2-linoleoyl-GPI (16:0/18:2)	46891795			HMDB0009784	0.4928	1.3171	0.2454	0.6225	0.7086	0.6853	0.651	0.8904	0.5709	0.9313	0.4686	0.3552	0.6408	0.6452	1.0687	0.7796	1.4793	1.3146	1.2389	1.7505	1.1277	1.3914	1.7738	1.2851	1.1758	2.0304	1.1156	0.4304	1.8931	1.1314	0.5854	1.5959
1-palmitoyl-2-oleoyl-glycosyl-GPE (16:0/18:1)					1.4747	1.5374	0.4174	0.9957	1.034	1.0475	0.8839	0.9736	0.8062	0.7587	1.088	1.0043	0.8496	0.805	1.0435	0.4657	1.2728	1.1304	1.0923	0.9299	0.5481	0.9413	0.6188	1.2093	1.42	1.3419	1.7812	0.8867	0.6723	1.2021	0.6608	1.4326
1-palmitoyl-2-oleoyl-GPC (16:0/18:1)	6436017	26853-31-6;26853-31-6	C13875	HMDB0007972	1.0113	1.2123	0.802	0.7641	0.97	0.7117	0.7739	0.9946	0.8813	0.9772	0.8947	0.7374	0.8424	0.9075	0.9701	1.1104	1.2132	1.0711	1.1712	1.203	0.916	1.1084	1.0878	1.1922	1.1956	1.226	0.9738	1.0054	0.9295	1.0849	1.2409	1.244
1-palmitoyl-2-oleoyl-GPE (16:0/18:1)	5283496	26662-94-2		HMDB0005320	1.2498	1.1677	0.5828	0.561	1.0325	0.6283	0.6799	1.2458	0.9893	1.2384	0.7434	0.5751	0.7951	0.825	1.2862	0.8719	1.2551	1.0107	1.2664	1.0313	0.6807	0.6647	0.9232	1.4358	1.2203	1.3313	0.7091	0.8084	0.8202	1.0879	1.3856	1.2423
1-palmitoyl-2-oleoyl-GPG (16:0/18:1)	70789105				0.8259	1.2568	0.8622	0.8544	0.9545	0.7247	0.8208	1.0296	0.977	0.8723	0.8706	0.8492	0.7948	0.8895	0.968	0.9475	1.0851	1.2811	1.029	1.1511	1.0168	1.2162	0.9825	1.1631	1.1494	1.1372	1.106	1.0632	1.1188	0.9832	1.1785	1.057
1-palmitoyl-2-palmitoleoyl-GPC (16:0/16:1)*	6443788			HMDB0007969	1.3614	1.9127	0.8523	0.7036	0.9882	0.8745	0.6333	0.8967	0.9336	0.9249	0.9356	0.7628	0.9131	0.8533	0.9246	1.2285	1.4895	1.4835	1.5338	1.4458	0.7541	0.945	1.6207	1.3143	1.2868	1.3392	1.0118	1.1621	0.8914	1.1834	1.5554	1.7276
1-palmitoyl-2-stearoyl-GPC (16:0/18:0)	24778686	59403-51-9	C03889	HMDB0007970	1.3823	0.6978	1.1154	1.1689	1.2485	1.0576	1.4935	1.7019	1.8933	1.3854	1.0525	0.832	1.1367	1.2497	1.8564	0.8835	0.9103	0.8423	0.8433	0.6953	0.936	0.7818	0.7869	1.3117	0.9981	0.9663	0.8685	1.1283	1.0019	0.8153	0.9229	0.6937
1-palmitoyl-2-stearoyl-GPE (16:0/18:0)*	5326793			HMDB08925	1.1211	0.5227	0.5227	0.5227	0.7681	0.5227	0.5227	1.2522	1	1.5057	0.5227	0.5227	0.5227	1.0094	1.4491	0.5227	0.5227	0.5227	0.5227	0.5227	0.5227	0.5227	0.5227	1.1503	0.5775	0.5227	0.5227	0.9868	0.5227	0.6665	0.6203	0.5227
1-palmitoyl-GPC (16:0)	86554	17364-16-8	C04102	HMDB0010382	1.0966	0.9626	0.8832	0.8742	1.2286	0.8396	1.0428	0.9715	0.796	1.0782	1.0473	0.8826	0.8145	0.8981	0.9719	0.8713	1.192	1.1841	1.2757	1.0434	0.934	1.233	0.9437	1.07	1.1022	1.1602	1.1013	0.8977	0.7255	1.0281	0.6482	1.1001
1-palmitoyl-GPE (16:0)	9547069	53862-35-4		HMDB0011503	1.3569	1.027	0.8626	0.8672	1.0359	0.7744	0.9652	1.0099	0.8403	0.9901	0.8983	0.9167	0.8807	0.87	1.0361	1.0464	1.1954	1.0847	1.1635	0.9894	0.9583	1.2466	0.9527	1.0444	1.0752	1.1643	1.0365	0.9658	0.7762	1.0155	0.7975	1.1742
1-palmitoyl-GPG (16:0)*	3300276				1.3519	1.0687	1.1132	0.6814	0.8453	0.8506	0.912	0.8275	0.5328	0.988	0.9106	1.1048	0.7981	0.6241	0.9347	0.8899	1.1484	1.061	1.1429	1.0197	1.1602	1.283	1.0821	1.1645	1.012	0.9828	1.2	0.8564	0.7497	1.1277	0.5847	1.0653
1-palmitoyl-GPI* (16:0)	71296207			HMDB0061695	1.204	0.6778	0.5226	0.0933	0.4384	0.2423	1.4018	1.9385	0.5511	0.9471	0.2168	0.7209	0.1028	0.5959	1.9238	2.916	0.8798	0.8404	1.2008	1.3299	0.7437	1.1108	2.5029	3.9456	0.77	1.4311	0.5608	1.0529	2.0179	2.3501	1.3521	3.5902
1-palmitoyl-GPS (16:0)*	9547100				1.1769	0.6504	0.7496	0.1015	0.2847	0.3096	1.6839	2.6883	0.8363	0.9933	0.2716	0.5501	0.1608	0.6295	1.7856	3.1918	0.5827	0.6815	1.1295	1.0092	0.8378	1.0958	2.9799	2.9943	0.6932	1.8282	0.6438	1.0067	1.7004	2.3949	1.6139	2.8538
1-palmitoylglycerol (16:0)	14900	542-44-9		HMDB0011564	1.0755	0.4483	0.7532	0.1463	0.3797	0.5141	1.9198	5.6017	1.0107	1.0083	0.2809	0.6808	0.14	0.9002	1.9018	3.6458	0.4598	0.5895	0.7626	1.0484	0.7136	1.0471	3.2113	3.9972	0.9128	1.1402	0.5589	0.9917	2.1762	2.2778	2.2145	3.7022
1-ribosyl-imidazoleacetate*	440569	29605-99-0	C05131	HMDB0002331	0.8366	1.3153	0.491	0.5608	0.5836	0.6359	0.3574	0.5016	1.2046	0.8599	0.4937	0.3585	0.6783	1.0492	1.0994	0.695	1.7508	1.3468	1.2336	1.2268	0.9733	0.7205	1.2407	1.4244	1.4566	0.8312	1.2007	0.6213	1.7364	1.0267	1.0365	1.7425
1-stearoyl-2-arachidonoyl-glycosyl-GPE (18:0/20:4)	46891781			HMDB0009003	0.9447	0.9971	0.9761	1.4065	0.8316	1.2573	1.4224	0.8125	0.8144	0.6034	1.2441	1.6499	0.9548	0.9642	1.0834	0.5497	1.1609	1.0392	0.8301	0.8703	1.0029	1.3906	0.7989	1.0091	1.3526	1.0649	1.7063	1.1228	0.9022	1.046	0.6487	0.9367
1-stearoyl-2-arachidonoyl-GPC (18:0/20:4)	16219824	35418-59-8		HMDB0008048	1.1677	0.7859	1.2056	1.3875	1.1824	1.2083	1.5395	1.1881	1.2493	1.1437	1.0699	1.329	1.2301	1.13	1.1789	0.7924	0.8634	0.8454	0.8384	0.8233	0.9817	0.9556	0.8509	0.9927	1.0073	0.94	0.9505	1.0809	0.9039	0.8934	0.8204	0.7036
1-stearoyl-2-arachidonoyl-GPE (18:0/20:4)	5289133		C05210	HMDB0009003	1.0122	0.8752	0.8274	0.9209	0.9842	0.8483	1.1903	1.1501	1.064	0.9998	0.8809	0.9134	0.9464	0.9504	1.1481	0.9605	1.1519	1.0706	1.0002	0.9943	0.9822	1.1601	0.993	1.3338	1.2322	1.1953	0.981	1.0927	1.0934	1.0043	1.0378	0.9367
1-stearoyl-2-arachidonoyl-GPI (18:0/20:4)		383907-33-3		HMDB0009815	1.0121	0.913	0.9145	1.1072	1.0388	0.9323	1.2452	1.2327	1.209	1.1071	0.9695	0.995	1.005	0.9927	1.1854	0.7269	1.0829	1.02	0.8416	0.9329	0.9363	1.0478	0.8421	1.1748	1.1753	1.0819	0.8855	0.9726	1.0153	0.97	0.9783	0.7958
1-stearoyl-2-arachidonoyl-GPS (18:0/20:4)	24779545			HMDB0012383	0.8803	0.8204	0.8502	1.0468	1.0675	0.9272	1.1862	1.3023	1.2451	1.1331	1.007	0.9131	1.0197	1.1259	1.2067	0.6538	1.0145	1.0367	0.8623	0.8615	0.8529	0.9819	0.7939	1.1609	1.1646	1.039	0.8075	0.993	1.1162	0.9434	0.9107	0.7297
1-stearoyl-2-docosahexaenoyl-glycosyl-GPE (18:0/22:6)					1.137	0.8723	0.9007	1.6394	0.9845	1.3565	1.9177	0.8961	0.7013	0.5663	1.2236	1.9235	0.9277	1.1753	1.1076	0.6021	1.2506	1.0809	0.6659	0.8613	0.8687	1.8132	0.7247	1.0971	1.5203	1	1.8029	1.3415	0.8838	1	0.5654	0.9002
1-stearoyl-2-docosahexaenoyl-GPC (18:0/22:6)	24778876	59403-52-0		HMDB0008057	1.1601	0.7288	1.1819	1.4601	1.2512	1.2871	1.5577	1.2261	1.1645	1.1576	1.1414	1.3671	0.9667	1.0258	1.302	0.6945	0.9495	0.7769	0.7779	0.8309	0.7319	0.9745	0.8056	1.0764	0.9857	0.8255	0.7508	1.1865	1.0143	0.9475	0.8627	0.7211
1-stearoyl-2-docosahexaenoyl-GPE (18:0/22:6)*	9546798			HMDB0009012	0.9083	0.7055	0.7389	1.0299	1.0122	0.8432	1.4355	1.0119	0.8502	0.9984	0.9197	1.0737	0.8483	0.9615	1.0016	1.036	1.2482	0.8376	0.8466	1.0367	1.0201	1.4703	0.989	1.2019	1.2939	1.2372	0.9245	1.099	0.9596	0.9791	0.9161	1.0148
1-stearoyl-2-linoleoyl-glycosyl-GPE (18:0/18:2)					0.9093	0.9856	0.8585	1.7816	0.8946	1.5196	1.5719	0.763	0.702	0.5288	1.228	1.8352	1.0437	1.089	1.2826	0.5399	1.1073	1.1222	0.6448	0.8192	0.8802	1.4466	0.7457	1.0169	1.3395	0.8803	1.8085	0.9154	1.1513	0.9171	0.4206	1.0144
1-stearoyl-2-linoleoyl-GPA (18:0/18:2)*	24779559			HMDB0007861	0.3519	1.0048	0.3972	2.3089	7.6279	0.4714	0.2526	3.6702	0.8823	1.4781	1.1675	3.6358	0.7032	0.3033	2.6576	0.5287	1.7883	2.1482	2.7119	0.828	1.6341	0.8412	0.861	0.6778	2.4002	0.8421	0.6369	2.4719	1.7599	1.4488	0.9952	0.3571
1-stearoyl-2-linoleoyl-GPC (18:0/18:2)*	6441487			HMDB0008039	1.0055	0.8462	1.0989	1.2437	1.0589	1.2467	1.345	1.1447	1.0406	0.9029	0.9945	1.2627	1.0767	0.9766	1.1935	0.8106	0.8695	0.8735	0.7804	0.8551	1.0086	1.0232	1.0091	0.9466	1.0308	0.9586	0.885	0.9544	1.1806	0.829	0.9179	0.8811
1-stearoyl-2-linoleoyl-GPE (18:0/18:2)*	9546749			HMDB0008994	0.9019	0.8169	0.7354	1.0107	0.9571	0.8492	1.1877	1.1424	0.9748	1.0331	0.7909	1.0045	0.9372	0.9741	1.3699	0.8707	1.1814	0.93	0.8365	1.0106	1.005	1.1973	0.9963	1.2694	1.2037	1.1905	0.8219	0.8752	1.1785	0.9121	1.0037	1.0367
1-stearoyl-2-linoleoyl-GPI (18:0/18:2)				HMDB0009809	0.5871	1.1033	0.5246	0.8713	0.8755	1.015	0.6948	1.4572	0.7618	0.9451	0.6434	0.5941	0.8398	0.9588	1.3082	0.7539	1.5996	1.1108	1.0641	1.0518	1.6036	1.1413	1.4269	1.4402	0.985	1.5563	1.6158	0.3262	1.7824	0.8527	0.6692	1.5774
1-stearoyl-2-oleoyl-GPC (18:0/18:1)	24778825	56421-10-4		HMDB0008038	1.2472	0.9637	1.3034	1.1783	1.2329	0.9697	1.2601	1.6385	1.3926	0.9783	1.0104	0.9371	0.9083	0.9944	1.336	0.9064	1.0291	0.9756	0.7965	0.8263	0.7156	1.0056	0.9742	1.3148	1.2461	0.9064	0.7926	1.1646	1.262	0.8038	1.1932	0.9852
1-stearoyl-2-oleoyl-GPE (18:0/18:1)	9546742			HMDB0008993	1.1412	0.8932	0.7819	0.9099	1.1322	0.7617	0.9531	1.7453	1.2089	1.2646	0.9093	0.7541	0.9451	1.0354	1.3767	0.9882	1.1313	0.9692	0.8941	0.9037	0.7805	1.0214	1.0233	1.4363	1.2792	1.0118	0.9399	0.8893	1.1164	0.8277	1.0932	1.141
1-stearoyl-2-oleoyl-GPS (18:0/18:1)	9547087			HMDB0010163	0.6508	0.8603	0.6696	1.0087	1.3869	0.9374	1.0628	1.4714	1.2677	1.7521	0.8313	0.728	1.1956	0.9002	1.2397	0.9913	1.4941	1.1987	1.1427	0.865	0.9304	1.2734	0.9373	1.3171	0.969	1.0172	0.7946	0.6664	0.8758	1.0882	1.1253	0.8751
1-stearoyl-GPC (18:0)	497300	19420-57-6		HMDB0010384	1.4915	0.7205	1.3473	1.2769	1.4506	1.1623	1.6089	1.3389	1.0026	1.2104	1.2039	1.1833	0.8831	0.9574	1.2506	0.8401	0.9974	0.9607	0.9609	0.7607	0.7835	1.0169	0.8982	1.1775	1.1698	0.9616	0.8887	1.0564	0.8748	0.9499	0.6438	0.9425
1-stearoyl-GPE (18:0)	9547068	69747-55-3		HMDB0011130	1.3966	0.9027	0.9611	0.9136	1.0326	0.7659	1.0533	0.9617	0.7764	1.0356	1.0095	0.9728	0.8917	0.8541	1.0796	1.1294	1.062	1.0545	1.0669	0.9312	0.9585	1.314	0.8701	1.1567	0.9905	1.1091	1.0354	1.0787	0.8099	1.0683	0.8824	0.8929
1-stearoyl-GPG (18:0)					1.3704	0.3955	0.8231	0.2164	0.3441	0.6523	2.0986	3.3297	0.8041	1.1591	0.3408	1.4609	0.1743	0.8637	2.129	2.4437	0.5764	0.6174	0.806	0.7627	0.8379	1.4335	2.7	3.6387	0.9953	1.0047	0.585	1.6503	1.9591	2.2711	1.557	2.1507
1-stearoyl-GPI (18:0)	71581135;42607495	796963-93-4		HMDB0240261	1.5434	0.8475	0.9927	1.0073	1.8449	0.7877	1.4171	0.8058	0.6911	1.538	1.1473	1.3721	0.8179	0.7625	1.1045	0.9034	1.2258	0.9105	1.0191	1.3867	0.5708	1.182	0.7748	1.3086	1.0435	0.9527	1.1797	1.0256	0.5405	0.8948	0.4576	0.8283
1-stearoyl-GPS (18:0)*	74819135			HMDB0061698	1.4019	1.0247	1.3451	0.967	1.081	0.8163	1.333	1.0537	0.8726	1.0421	1.2702	0.865	1.0074	0.945	0.9276	0.8585	0.9024	0.9625	1.0452	0.9507	0.9408	1.1176	0.9926	1.0615	0.9155	1.3782	1.0817	1.0276	0.8267	1.0524	0.6163	0.8001
10-heptadecenoate (17:1n7)	5312435	29743-97-3		HMDB0060038	1.2341	0.7351	0.8316	0.133	0.7327	0.4389	2.6119	9.1639	0.8226	0.8493	0.3076	0.941	0.0979	0.859	2.6458	3.0061	0.5871	0.832	1.0745	1.2333	0.7122	1.1982	3.4023	4.754	0.8743	1.9445	0.9202	1.059	2.9524	3.8231	2.46	7.2157
10-nonadecenoate (19:1n9)	5312513	73033-09-7		HMDB0013622	1.1799	0.4986	0.8467	0.1455	0.5649	0.4159	2.2516	7.9036	0.9005	1.1293	0.3465	0.7333	0.1094	1.0028	2.6766	2.3556	0.4797	0.5936	1.0759	0.9972	0.7504	0.8507	2.2326	3.8811	0.8558	1.6022	0.6029	1.0314	2.4909	2.779	2.3248	4.2417
12,13-DiHOME	10236635	263399-35-5	C14829	HMDB0004705	1.0236	0.8355	0.5187	1.8271	1.9706	1.2631	1.5545	2.2631	0.7775	1.7375	1.921	1.2848	0.8072	0.8445	1.1977	0.3955	1.2776	0.9878	1.0122	0.9484	1.1868	0.7189	0.4412	0.8657	0.8724	1.4442	1.217	0.7386	0.8289	1.1293	0.3926	0.8477
13-HODE + 9-HODE	5312830;1424;5282947;5282944;5282945		C14767,C14762	HMDB0004667,HMDB0004670	0.8372	0.9221	0.6539	1.4514	1.9478	1.3968	0.5332	1.7176	1.2808	1.0682	0.8647	1.2525	0.7021	1.078	1.2297	0.4672	0.8758	1.2898	0.9446	0.6433	1.3969	0.5372	0.7306	1.0554	1.0685	1.8296	1.7307	0.9136	0.7685	1.0968	0.6532	0.6109
14-HDoHE/17-HDoHE	11566378;6439179			HMDB0010213,HMDB0060044	0.594	1.0284	0.9689	0.8595	2.4244	1.6547	0.3407	0.7393	1.9068	1.9099	2.1402	1.6516	0.9315	1.3407	1.5603	0.7373	0.1232	1.0566	0.9785	1.0215	0.5443	1.4736	0.2635	1.4877	0.3814	3.7695	2.0883	1.393	0.5705	0.2379	0.1182	0.1131
16-hydroxypalmitate	10466	506-13-8	C18218	HMDB0006294	2.2282	1.0316	0.8123	1.3663	1.5576	0.9014	0.9413	0.7487	0.6903	1.3984	1.1397	1.1471	1.3825	0.7508	0.8497	0.6996	1.0714	0.8203	1.2626	0.9772	1.0056	0.745	0.7126	0.7391	1.0606	1.1263	1.2585	1.1007	0.8661	0.9944	0.8094	1.1886
19,20-DiHDPA	16061148			HMDB0010214	1.2725	0.7714	0.648	2.2487	2.5794	1.2243	1.7919	0.924	0.9006	2.0133	1.7105	1.3718	0.9798	1.0651	1.3323	0.4457	1.1483	0.6886	0.768	0.813	1.1119	0.9979	0.4158	0.6505	0.8888	1.0226	1.3979	1.1284	0.8172	1.0021	0.427	0.7815
2'-deoxyadenosine 5'-monophosphate	12599	653-63-4	C00360	HMDB0000905	0.5743	1.0072	0.7778	0.7274	1.3429	0.4048	1.1226	1.6547	0.7768	0.6851	0.8433	0.6207	1.1461	1	0.5719	0.4048	0.7926	1.0557	1.5649	0.7406	0.4048	1.7093	1.0817	0.6759	1.4367	0.4048	0.808	1.776	1.1248	1.0276	1.2701	0.8979
dCMP	13945	1032-65-1	C00239	HMDB0001202	1.3255	1.0613	1.131	0.9557	1.3613	0.8056	1.1031	1.2418	1.2472	0.9921	1.0334	1.2109	1.0685	1.0079	0.86	0.6482	0.8446	1.2057	0.7472	0.907	0.6529	1.1648	0.8826	0.8195	0.9367	0.7216	1.1852	1.2712	0.5845	0.9272	0.7759	1.0702
2'-deoxyinosine	135398593	890-38-0	C05512	HMDB0000071	1.1145	0.9607	1.2689	1.0244	0.8204	1.1286	0.9082	0.8571	1.2827	0.8874	0.8817	0.9958	1.3033	1.0137	1.1164	1.1761	0.834	0.825	0.9761	0.9362	1.534	1.5387	1.2695	0.7175	1.0747	0.6279	1.2795	1.0911	0.6284	0.7488	1.0042	0.9767
2'-deoxyuridine	13712	951-78-0	C00526	HMDB0000012	0.869	1.6725	0.478	1.0925	2.1196	0.6801	0.8494	0.5692	1.1291	1.4573	1.5917	0.7195	1.2571	0.8139	1.1503	0.7506	1.565	0.7446	0.9275	1	2.9262	1.2839	2.4211	0.6233	3.17	0.3895	0.8928	0.3895	3.9534	0.6187	0.5984	2.8296
2'-O-methylcytidine	150971	2140-72-9			0.8566	0.8401	1.4623	1.2487	0.8498	1.1134	0.8044	0.8308	1.1479	0.7585	0.8314	1.1015	0.8854	0.6192	0.6643	0.9256	1.0032	1.2367	0.9968	1.0102	1.0396	1.9425	1.4956	0.8774	1.0623	0.8322	2.3432	1.1194	1.2562	0.8247	0.6072	1.2795
2'-O-methyluridine	102212	2140-76-3			1.0062	0.928	1.1008	1.3892	1.1589	0.7812	0.98	0.7575	1.0721	1.2176	0.9685	1.0684	0.9124	0.8514	0.8832	0.8735	1.2225	1.2259	0.9675	0.9222	1.2439	1.7171	0.9973	1.0027	1.0718	0.8788	1.6804	0.9444	1.1917	0.8535	0.6671	1.0216
2,3-dihydroxy-5-methylthio-4-pentenoate (DMTPA)*				HMDB0240388	1.1686	0.7762	1.341	0.7631	1.4365	1.2055	1.1997	1.0246	1.2192	1.2105	1.2646	1.0689	0.7658	0.9754	1.2862	0.6152	0.7149	0.8745	1.1447	0.6967	1.1066	0.8143	0.8894	1.2064	1.1765	0.8394	0.6978	1.4371	0.8872	0.9643	0.6121	0.872
2,3-dihydroxyisovalerate	677	1756-18-9	C04039	HMDB0012141	3.625	1.0036	0.7078	0.892	0.8807	1.7801	1.2906	0.8924	0.7389	0.7266	0.9964	3.2553	0.5375	0.4321	1.5123	0.8225	1.2769	1.3637	2.0138	2.2022	1.7157	0.6115	0.5784	3.1339	0.9775	2.432	0.9267	1.5805	1.5214	3.1677	0.6771	0.8824
2,4-di-tert-butylphenol		96-76-4			0.8708	0.5715	0.6369	0.0717	0.2863	0.3964	1.6075	1.9635	0.9514	1.015	0.2625	0.8179	0.0804	0.9469	2.3499	1.7065	0.5516	0.7731	0.985	1.1132	1.0516	1.3627	2.9178	2.1388	0.6359	1.3694	0.6301	1.0804	2.5549	2.3514	2.2274	1.4138
2,4-dihydroxybutyrate	192742	1518-62-3		HMDB0000360	1.0012	0.9967	0.7872	0.5216	0.6321	0.5852	0.7479	0.5024	0.5894	0.6453	0.7232	0.6656	0.7758	0.7102	0.9988	1.2288	1.2939	1.6539	1.4448	1.2477	0.9132	0.9459	1.1637	1.5318	1.1455	1.2704	1.2289	1.5997	1.2081	1.4024	1.0036	1.1392
2,6-dihydroxybenzoic acid	9338	303-07-1		HMDB0013676	1.6921	0.6492	0.9734	0.3809	1.5588	0.788	0.8285	0.5058	1.0035	1.7363	1.1218	1.0429	0.631	0.6878	1.8438	0.9671	1.7776	1.2982	1.6863	1.4459	0.4743	0.3072	0.9582	2.6884	0.9965	1.6295	0.4522	1.1421	0.4792	1.9497	0.7197	1.5042
2,8-quinolinediol	97250	15450-76-7	C06342		0.2538	1.9056	0.2538	0.3267	0.8112	0.4059	0.2538	0.2538	0.2739	1.0999	1.11	0.2538	0.6261	0.2538	0.3866	0.2872	3.0771	1.7881	1.0624	0.2538	1.5204	0.4516	1.0256	0.2538	0.2538	2.7232	0.9744	0.7385	1.467	1.0327	0.469	1.6458
2,8-quinolinediol sulfate					0.2908	1.1627	0.2908	1.6849	0.8745	1.0357	0.2908	0.2908	0.4184	1.98	1.1883	0.3999	1.5903	0.38	1.0348	0.3333	2.2256	1.8334	0.9077	0.2908	2.2564	0.5975	0.7291	0.2908	0.2908	2.7478	0.959	0.9652	1.7827	0.7388	0.5664	1.5575
2-aminoadipate	92136	542-32-5;1118-90-7	C00956	HMDB0000510	2.4822	0.6687	0.6461	1.2044	0.6943	2.7287	0.9967	0.4309	0.8494	1.0825	1.2508	1.582	1.9808	1.1695	2.6225	0.5392	0.4826	0.6567	0.9944	1.0033	0.5657	0.3585	3.3945	1.2783	2.8499	1.9201	0.7981	0.9523	0.4096	1.7816	1.0919	0.7718
2-aminoheptanoate	227939	1115-90-8		HMDB0094649	1.5121	0.8408	0.8206	1	1.6499	1.0404	0.5014	0.5014	0.855	2.4525	1.5345	0.5014	0.7568	1.7388	2.0427	0.5014	0.7251	0.8212	1.2901	1.1877	0.5014	0.5014	0.5014	0.917	0.5014	1.3898	0.5014	0.7278	0.9739	1.4465	0.648	0.5014
2-aminooctanoate	69522	644-90-6		HMDB0000991	0.5406	1.2843	0.6508	1.4401	0.7059	0.9399	1.1747	0.5406	1.1823	1.3691	1	0.786	0.7384	1.1755	0.9867	0.5406	0.7929	0.8961	0.5406	0.5406	0.5406	1.073	0.5406	0.7947	1.1383	0.9026	0.5406	1.1457	1.0277	1.0837	0.8266	1.1735
2-aminophenol sulfate	181670			HMDB0061116	0.2109	0.6573	1.0606	1.16	2.5833	0.2747	1.434	1.6813	0.4576	1.713	2.3771	0.2063	0.171	0.1622	0.3822	0.3603	2.4783	0.9394	1.3267	1.1619	0.4324	0.3975	1.464	2.4073	0.1116	2.7482	0.6886	0.4345	1.8365	2.2434	0.8826	3.4423
2-arachidonoylglycerol (20:4)	5282280	53847-30-6	C13856	HMDB0004666	1.3795	0.4829	0.9087	0.107	0.2759	0.4025	1.9987	4.1544	1.2025	1.4748	0.2256	0.511	0.0684	0.8353	2.3605	3.0059	0.4205	0.6914	1.0783	0.8745	0.9244	1.0756	4.0728	4.6658	0.8699	1.2078	0.5241	0.6544	2.342	2.167	1.6301	2.6217
2-butenoylglycine	6303498	71428-89-2			0.8035	1.2467	0.8331	1.8745	0.8338	0.4429	1.4833	0.895	0.6753	1.1108	0.8577	0.8852	0.4282	0.9271	0.8766	0.9626	1.5228	1.5507	1.4799	1.089	1.0491	1.2639	0.7073	0.8511	1.234	1.642	1.7161	0.5464	1.2274	1.0374	0.7096	1.2431
2-docosahexaenoylglycerol (22:6)*	46896303			HMDB0011557	1.3548	0.6073	1.0213	0.1727	0.3237	0.7133	2.4272	3.6209	1.4232	1.3947	0.2688	0.6239	0.0967	0.9692	2.5524	2.713	0.5494	0.8031	0.9732	0.9787	1.3812	1.2646	3.9671	4.2896	0.9464	0.8995	0.6691	0.7126	2.6706	1.9998	1.3649	2.1278
2-eicosapentaenoylglycerol (20:5)*	11660820			HMDB0011550	1	0.2614	0.5815	0.2614	0.2614	0.656	1.9176	5.3025	0.6641	0.7682	0.2614	0.8362	0.2614	0.2614	3.1974	1.9724	0.2614	0.2614	0.2614	0.2614	0.4742	0.9986	4.7902	3.4927	0.5174	0.2614	0.2614	0.2614	2.8741	1.0123	0.2614	4.8039
2-heptadecenoylglycerol (17:1)*					1.0741	0.7408	0.9833	0.2632	0.3013	0.531	1.9414	6.5094	1.298	0.734	0.2632	0.3758	0.2632	0.7108	2.1605	2.9061	0.3695	0.8945	1.071	1.0167	0.5974	0.7341	5.6877	4.4511	0.7586	1.1669	0.4837	0.3818	2.7348	3.1554	2.6187	5.2495
2-hydroxy-3-methylvalerate	164623	488-15-3		HMDB0000317	0.3371	1.0053	1.0871	0.3371	0.4056	0.3371	0.3371	0.3371	0.3371	0.5541	0.3371	0.3371	0.5792	0.6692	0.9474	1.2634	0.8974	1.46	0.6318	0.7092	1.4636	1.4429	1.218	0.9978	2.3855	1	0.7885	1.9609	1.0494	0.9941	1.2272	1.4979
2-hydroxyadipate	193530	18294-85-4	C02360	HMDB0000321	1.0167	0.685	0.6194	3.2149	0.9058	0.8257	0.8042	0.9467	0.4719	1.4149	1.0932	0.7759	0.7333	0.7119	1.2861	0.5018	1.4394	1.4205	1.9737	0.9833	1.291	0.6435	2.2656	1.5242	2.9751	2.0722	1.5607	0.8376	0.8232	1.667	0.9703	1.6178
2-hydroxybutyrate/2-hydroxyisobutyrate	4277439;440864		C21297,C05984	HMDB0000729,HMDB00008	1.1623	0.7237	1.2622	0.9055	1.4906	0.6914	1.3692	0.9577	0.9214	1.5784	1.3152	0.8183	0.7518	1.0177	1.309	0.5892	1.0247	0.7274	1.4786	1.3277	0.6609	0.8618	0.9232	0.9823	1.0284	0.9789	1.5948	1.0858	0.6256	1.2668	0.4956	1.2972
2-hydroxyglutarate	43	40951-21-1	C02630	HMDB0059655	1.207	0.9112	1.0757	0.9766	1.1235	0.8388	1.4025	0.6136	1.1668	1.082	1.0565	0.8932	0.9963	1.5423	1.3579	0.7658	1.1112	0.8876	1.4385	0.9531	0.808	0.8192	1.0167	1.0037	1.0111	0.8437	0.7773	1.0328	0.8332	1.4593	0.793	0.7391
2-hydroxypalmitate	12575964;92836;11065598	764-67-0		HMDB0031057	1.2751	0.5567	0.6497	0.248	0.5066	0.3831	1.7799	3.3801	0.9365	1.1747	0.3636	0.4555	0.2226	0.6888	2.4068	3.1666	0.4948	0.5548	1.1063	0.8919	0.7489	1.0635	2.8751	4.2812	0.8139	1.764	0.565	1.2622	2.0372	3.8726	2.4387	2.9071
2-hydroxystearate	69417;439885;439887	629-22-1	C03045,C03042	HMDB0062549	1.6071	0.5105	0.8128	0.2693	0.4174	0.4573	2.5587	3.5642	0.8746	1.2137	0.3678	0.8776	0.1992	0.9469	3.1144	3.2279	0.4542	0.5939	1.0531	0.9223	0.7058	1.1086	2.966	3.1322	0.7531	1.1814	0.5447	1.3127	2.1404	2.8015	2.8102	2.6697
2-ketogulonate	50	342385-52-8	C15673	HMDB0011732	0.8501	1.5473	0.716	1.5977	1.0621	1.0575	1.3058	0.5975	0.5854	0.8647	0.4801	1.0888	0.6388	0.75	0.7095	0.7075	1.0041	1.2908	1.6024	0.819	0.8039	1.2645	1.2559	0.9959	1.024	0.8613	1.049	0.5267	1.5008	1.4442	0.8962	1.0363
2-linoleoylglycerol (18:2)	5365676	3443-82-1		HMDB0011538	0.9457	0.4923	0.7618	0.1437	0.2724	0.6023	3.0753	6.1716	1.4357	1.1328	0.2477	0.7643	0.0768	1.0543	2.3394	3.1336	0.4285	0.7355	0.7851	0.9348	1.0733	1.588	4.2806	4.1444	0.8027	1.3602	0.5897	0.5559	3.305	2.6678	1.753	3.9002
2-methylbutyrylcarnitine (C5)	6426901	31023-25-3		HMDB0000378	1.0964	0.6902	1.4734	0.2394	0.8587	0.5225	2.1077	0.8343	1.6359	2.7872	1.8967	0.2799	0.7479	1.1425	0.8413	1.543	1.171	0.8633	0.8049	2.4235	0.3401	0.4491	2.3631	1.5202	1.1597	1.9559	0.8064	0.9094	0.4685	1.1931	0.8225	1.0906
2-methylbutyrylglycine (C5)	193872	52320-67-9		HMDB0000339	1.1245	0.9124	0.934	1.855	1.7375	0.4978	1.4117	0.5821	0.6895	2.3294	1.7214	0.5731	0.8669	0.6566	1.0919	0.8636	1.3332	0.8168	0.8313	1.5553	0.7545	0.9977	1.2213	1.2528	0.9294	1.4268	1.3666	1.3079	0.5455	1.0023	0.7792	1.2728
2-methylcitrate/homocitrate	515;439459		C01251	HMDB0003518,HMDB0000379	0.9639	0.6544	0.8738	1.13	1.3375	1.0283	1.3405	1.0714	0.848	1.2283	1.2815	1.1456	1.0173	0.866	0.9976	0.8353	0.9986	0.8235	1.145	0.8244	1.0014	1.3171	0.8008	1.1289	0.9954	0.7735	0.8129	1.6167	0.7622	1.0603	0.8107	1.0383
2-methylmalonylcarnitine (C4-DC)	53481628	149181-64-6		HMDB0013133	0.9416	0.8196	0.2324	0.7739	1.1776	0.9809	0.4684	3.2553	1.2395	1.1229	3.8724	1	1.0064	1.0016	1.4704	0.2324	0.9503	0.8101	1.0775	1.3659	0.779	0.688	0.9369	0.8015	1.174	0.8116	1.2797	1.9317	0.7539	1.226	0.9448	1.0684
2-methylserine	94309		C02115		1.0282	0.8861	1.3004	0.8938	1.1116	0.8579	1.3036	1.0559	1.6742	1.3172	0.938	1.1309	0.8075	1.5609	1.8482	0.7578	1	0.9754	0.8881	1.1959	0.8664	0.766	1.2065	1.1302	0.3613	0.7577	1.2665	1.207	0.3613	0.9445	0.7098	0.7951
2-myristoylglycerol (14:0)	137938	27214-38-6		HMDB0011530	1.7014	0.6062	0.8794	0.1224	0.2585	0.4222	2.7115	5.8411	1.8609	1.0154	0.2035	0.5487	0.1237	0.8863	2.6317	3.3391	0.2623	1.0013	1.2794	0.583	0.3994	0.9987	3.6583	6.3422	0.9189	1.0014	0.6225	0.5459	1.6866	4.3382	3.247	3.993
2-O-methylascorbic acid	54726398	17860-87-6		HMDB0240294	0.7294	1.0936	0.721	0.7554	1.0094	0.8221	0.9906	0.9375	0.8528	0.8169	1.0529	0.7559	0.7322	0.9227	1.0861	0.9599	1.1913	1.2917	1.1863	0.8971	0.9444	1.2838	1.4403	1.0183	1.1824	0.7673	1.1586	1.5922	1.0244	1.1015	0.7128	1.0293
2-oleoylglycerol (18:1)	5319879	3443-84-3		HMDB0011537	1.1944	0.6908	1.0812	0.1332	0.3118	0.5755	1.7016	6.4515	1.4023	1.0258	0.3127	0.5097	0.0813	0.8599	1.6605	3.3495	0.4676	0.9202	0.8618	1.0028	0.7299	0.9972	3.9562	4.8108	0.9442	1.2814	0.5488	0.5146	2.4983	2.4659	2.4685	3.1273
2-oxindole-3-acetate	3080590	2971-31-5		HMDB0035514	2.6296	0.4823	1.009	0.243	0.8908	2.1083	1.6848	0.671	1.0914	0.7395	0.991	1.0117	0.9416	0.349	0.7722	0.8865	2.2321	2.8741	0.8421	1.4875	0.243	0.6031	2.3743	3.1718	0.6393	2.0254	0.3185	1.3448	0.577	1.2447	0.243	1.7002
2-oxoarginine*	558	3715-10-04	C03771	HMDB0004225	1.4226	1.0116	0.7734	0.6605	1.2616	0.6927	1.0164	0.6493	0.6766	1.1527	1.209	0.578	0.9828	0.8873	1.0629	0.6129	1.0546	0.8563	1.314	1.8179	0.6196	0.5724	1.5453	1.4447	1.2784	2.1306	0.9884	0.7235	0.6255	1.5067	0.616	1.606
2-palmitoleoyl-GPC* (16:1)*	122164832			HMDB10383	1.5883	2.1376	1.2305	0.9459	0.956	0.9821	0.7793	0.9739	0.9667	0.9495	1.1914	0.8502	0.9394	0.8218	0.9848	0.9975	1.3122	1.4686	1.7599	1.3277	0.9059	1.0025	1.6237	1.2507	1.3809	1.2587	1.3351	1.0294	0.5098	0.9251	0.9406	1.9831
2-palmitoleoylglycerol (16:1)*	53480960			HMDB0011534	1.2529	1.2481	0.8259	0.1011	0.2619	0.7954	1.1819	3.8432	1.1481	0.6774	0.2146	0.6648	0.0716	0.6108	1.1166	2.8527	0.4823	1.3466	0.9894	1.1101	0.468	0.8236	6.0466	3.6647	0.842	1.0106	0.5899	0.6395	2.0452	1.9162	2.5358	4.2098
2-palmitoyl-GPC* (16:0)*	15061532			HMDB0061702	0.9511	0.3706	0.7587	0.1267	0.4855	0.3465	1.8977	2.7335	0.9068	1.1538	0.2632	0.7443	0.1278	0.9303	1.9315	2.8939	0.6993	0.5697	1.4691	1.0388	0.9612	1.6128	3.1372	3.0928	0.9235	1.5564	0.642	1.165	1.6739	2.3003	1.8091	3.2273
2-palmitoylglycerol (16:0)	123409	23470-00-0		HMDB0011533	1.4358	0.6109	0.8447	0.2143	0.4274	0.6022	1.7953	3.7762	1.3564	1.2025	0.278	0.6697	0.1612	1.0174	2.0923	2.2561	0.6631	0.7119	0.9335	0.9988	0.896	1.0012	2.5967	3.4583	0.8991	1.1368	0.5897	0.9073	1.9043	2.1088	2.2374	2.3642
2-stearoyl-GPE (18:0)*	90658453;53480667			HMDB0011129	1.3579	0.3569	0.8301	0.0941	0.4893	0.2485	2.3099	3.3079	1.0753	1.247	0.2659	0.896	0.0924	1.2275	2.3891	3.9862	0.8117	0.4702	0.3995	0.4887	0.9523	1.0477	1.8148	3.0813	0.4948	0.9148	0.6021	1.3042	2.193	2.5063	2.4141	3.3122
2R,3R-dihydroxybutyrate	13120901	759-06-8		HMDB0000498	0.7521	0.6205	1.0516	0.5208	0.6809	0.9611	0.6454	0.8996	0.8777	1.0659	0.9282	1.0648	0.7716	0.5168	1.0484	1.3324	0.9275	0.9548	1.1797	1.1219	0.9112	1.0389	1.2204	1.3053	1.1358	1.0967	1.1277	1.571	0.7636	1.1608	0.5621	1.1552
2S,3R-dihydroxybutyrate	10964471	5057-93-2		HMDB0002453	0.8404	0.6825	0.5849	0.3917	0.5997	1.252	0.5459	0.5331	0.729	1.3025	0.5261	1.4793	1.0391	0.579	0.7135	1.5261	0.8915	1.4166	1.4101	1.5872	0.8215	1.4504	1.0783	1.679	1.4103	1.1468	0.9372	2.1207	0.9609	1.2133	0.5499	1.297
3'-dephospho-CoA-glutathione*					1.0479	1.011	0.6468	0.9362	1.2222	0.6742	0.917	0.989	0.8875	1.1152	1.2904	0.7689	0.8016	0.7731	0.7657	0.8802	1.2954	1.2597	1.0505	1.014	0.9618	1.2131	0.7625	1.0128	0.9734	1.4313	1.24	1.1699	0.6418	1.0321	0.5896	1.0277
3'-dephosphocoenzyme A	444485	3633-59-8	C00882	HMDB0001373	1.1974	0.9824	1.1951	1.2775	1.0303	1.1842	1.1027	0.8137	0.9823	1.317	1.3378	1.3677	1.3701	1.2541	1.2441	0.5498	1.0881	0.5919	1.0176	0.8963	0.9585	0.8166	0.9275	1.0252	0.9592	0.5668	1.0655	0.9728	0.7109	0.9179	0.5918	0.763
3,5-dichloro-2,6-dihydroxybenzoic acid	24721632				0.7589	1.2532	0.7553	1.151	0.5308	1.2564	0.7244	0.8517	0.7829	0.8808	0.8981	0.8527	0.5704	0.8233	0.8632	1	1.2463	1.3649	1.058	1.0527	1.0533	1.4256	1.0421	1.1185	0.6891	1.1098	1.2463	0.5308	1.0082	0.9674	0.7915	1.2126
3-(3-hydroxyphenyl)propionate sulfate	187488	86321-32-6		HMDB0094710	1	0.9922	1.0592	0.5261	2.0097	0.9787	2.3128	1.432	0.5722	0.7666	1.45	0.1206	0.1871	0.3012	0.7106	0.4451	4.2927	1.8354	1.6893	2.7649	0.3137	0.252	1.518	2.9092	0.1206	7.4741	0.3784	0.5013	1.4292	1.7167	0.247	1.0728
3-(4-hydroxyphenyl)lactate (HPLA)	9378	6482-98-0	C03672	HMDB0000755	1.2254	1.0783	0.9986	0.5819	1.0932	0.6819	1.1923	0.8217	0.7208	1.0014	0.8414	0.633	0.9331	0.9612	0.9618	0.9708	1.1467	1.286	1.2555	1.178	0.8689	0.7455	1.1006	1.3459	1.1665	1.0818	1.1715	0.6765	0.8098	1.2715	0.7612	1.2703
3-amino-2-piperidone	5200225	1892-22-4		HMDB0000323	1.8178	1.43	0.9605	0.9002	1.4712	0.5904	0.9475	0.9279	0.8645	1.5913	1.3619	0.7169	0.5719	0.6469	0.769	0.6409	1.0395	1.1859	1.427	1.1932	0.8835	0.8686	0.4488	1.2598	1.2163	1.2999	1.3334	1.2407	0.4628	1.5244	0.4579	1.529
3-aminoisobutyrate	64956	10569-72-9;214139-20-5	C05145	HMDB0002166	1.2199	0.7101	1.0008	1.1911	1.2017	1.1551	0.8601	0.7191	1.059	1.1295	1.1959	1.3957	0.9992	1.0366	1.4602	0.6358	0.8804	1.0357	0.9814	0.9463	0.8126	0.7583	0.6101	1.0882	1.0763	0.9426	0.6232	1.2946	0.7196	1.1361	0.6118	0.8219
3-formylindole	10256	487-89-8	C08493	HMDB29737	0.707	1.0619	1.288	0.9751	1.145	0.8023	1.2496	1.0167	1.3711	0.6664	1.0751	0.6487	1.0586	1.0413	0.7622	1.1043	0.6671	0.8729	0.6989	0.9795	0.9833	1.4124	1.2109	0.6327	0.8886	0.7385	1.1945	1.103	0.7941	1.0819	0.7919	1.2685
3-hydroxy-2-ethylpropionate	188979	4374-62-3		HMDB0000396	1.2024	0.7786	1.0839	1.0148	0.7195	0.7195	1.3958	0.9562	0.9192	1.1896	0.9862	0.9432	1.1015	0.7195	1.2021	0.8903	0.7195	1.0498	0.7195	1	0.9113	0.7195	1.0316	1.52	0.7195	0.9586	0.7252	1.2212	0.874	0.9605	0.7195	1.0113
3-hydroxy-3-methylglutarate	1662;5459993	503-49-1	C03761	HMDB0000355	0.6852	0.7991	1.7101	2.22	0.9872	0.9025	1.7208	0.8031	2.2172	0.8386	0.8259	1.0584	0.7595	0.5276	0.8391	0.976	1.18	1.5396	1.6342	0.9398	1.673	1.428	2.2752	1.0996	0.713	1.0151	1.1645	1.0128	1.6653	0.8866	0.6084	0.8737
3-hydroxyadipate	151913			HMDB0000345	0.6665	0.7777	0.6545	1.8092	0.9722	1.3347	1.1132	0.8815	0.8387	1.1547	1.0274	1.93	2.2523	2.6476	0.8661	1.8251	0.9487	0.9726	0.8625	0.7747	1.3682	1.411	1.2315	0.7727	0.8988	1.1334	1.8628	2.0187	0.8291	0.6876	0.4358	1.1785
3-hydroxybutyrate (BHBA)	441;94318;92135	625-72-9	C03197,C01089	HMDB0000011,HMDB0000357,HMDB0000442	0.5839	0.7477	0.551	2.0996	1.091	1.1897	1.844	1.036	0.7568	1.4173	1.1193	1.0942	0.859	0.6843	0.7487	0.5234	1.0753	1.0816	0.5129	1.0253	0.9372	1.0668	0.9557	1.0943	0.6433	1.5685	1.1854	0.9231	0.9933	1.0067	0.5131	0.7571
3-hydroxybutyryl CoA	11966146;440045	103404-51-9	C03561	HMDB0001166	0.5917	1.0915	0.937	1.3859	1.0063	0.9611	1.8841	1.2282	1.5628	1.2998	1.4359	0.6274	2.4222	1.5415	1.353	0.5917	1.5693	0.5917	0.9055	0.9937	0.5917	0.9721	0.94	0.982	1.5614	0.5917	0.9573	0.976	0.5917	0.9054	0.9917	0.5917
3-hydroxydecanoate	26612	5561-87-5		HMDB0002203	0.8628	1.1236	0.5579	2.1989	1.0744	0.7767	1.1303	1.0864	0.9414	1.136	1.1668	0.7213	0.8979	0.7584	1.0124	0.6869	0.9609	1.0643	1.3781	0.8921	1.2024	0.8193	0.9876	1.1816	0.8551	1.1905	1.274	0.9097	1.014	1.0954	0.9825	0.6601
3-hydroxydecanoylcarnitine	121454166			HMDB0061636	0.9318	1.2546	0.5797	1.2759	1.0029	0.8774	0.845	0.9406	0.7704	1.2955	0.7178	0.5228	0.9084	1.2036	1.4629	0.5973	0.8212	1.3604	1.4112	1.3749	1.0481	0.7546	0.765	1.3093	1.2141	1.1966	0.8787	0.5228	1.1297	1.8004	1	0.7157
3-hydroxydodecanedioate*	16663321	34574-69-1		HMDB0000413	1.1898	1.4433	0.5553	1.5264	1.1975	1.492	1.1073	0.9211	1.0672	1.0132	0.8949	0.6526	0.9868	0.8936	0.9641	0.5392	1.215	1.7213	1.0801	1.2678	1.2895	0.9304	0.8186	0.8841	0.9015	1.7326	1.7951	0.846	1.2654	0.8584	0.6119	0.9545
3-hydroxyhexanoate	151492	10191-24-9		HMDB0061652,HMDB0010718	1.0425	1.0914	0.8107	1.7728	1.3021	0.7562	1.4138	0.9204	0.7955	1.2008	2.2461	0.4142	0.9346	1.3941	1.0025	0.5841	1.2605	0.902	1.0352	1.2377	0.8688	0.8027	0.9975	1.426	1.0667	1.5655	0.7198	0.807	0.9542	1.3359	0.8903	0.8716
3-hydroxyhexanoylcarnitine (1)					1.5895	1.578	1.28	0.5094	0.5914	0.6452	0.8832	0.6653	1.1429	0.9242	1.2537	0.2477	1.1256	1.8136	0.6535	0.8793	0.938	0.9951	1.2221	1.294	0.5337	0.5105	1.8342	1.0423	1.0049	1.8684	1.2494	0.8552	0.7234	1.4565	1.1664	0.8634
3-hydroxyhexanoylcarnitine (2)					1.7184	1.4297	1.0406	0.3575	0.6041	0.5488	1.1329	0.7667	0.9799	1.0898	1.3574	0.0328	1.1456	1.7081	0.9606	0.655	1.0326	1.0201	1.5765	1.1311	0.4716	0.3742	1.4897	0.8151	0.8412	1.9113	1.1337	0.7906	0.5372	1.6441	0.9494	0.6092
3-hydroxyindolin-2-one	6097	61-71-2	C11130		0.4191	1.0383	0.6109	1.9497	1.036	1.5255	0.6633	0.5165	0.4599	0.4948	0.9085	0.6707	0.4809	0.43	0.6751	0.9694	2.0119	0.9335	1.3691	2.412	1.9346	1.2547	3.8542	1.5553	0.6568	1.5351	1.9427	0.4765	1.5546	1.0306	0.7358	2.1887
3-hydroxyisobutyrate	11966314	2068-83-9	C01188,C06001	HMDB0000023,HMDB0000336	0.9944	0.8418	1.1212	0.9936	1.0956	1.1048	1.5322	0.537	0.8752	1.4212	1.047	0.8368	1.21	1.0644	1.0453	0.7162	0.6933	1.6184	1.0056	1.1073	0.6075	0.5898	0.9384	1.6158	0.9694	2.2802	1.0133	0.9375	0.991	1.4436	0.5436	0.9667
3-hydroxylaurate	94216	53941-38-1		HMDB0000387	0.7743	1.4321	0.5839	2.4617	1.4336	1.6404	0.9233	1.3335	1.1595	1.4741	0.8796	1.3974	1.0007	1.2605	1.1576	0.7459	0.9144	0.8805	0.6139	0.5361	1.4494	1.1683	0.7833	0.7061	1.1043	0.7807	2.0391	0.9993	1.4544	0.8518	0.7945	0.9521
3-hydroxyoctanoate	26613	88930-08-9	C20793	HMDB0001954	0.8822	1.1025	0.8431	1.7679	1.1236	0.7659	1.1379	1.0264	0.8338	1.1175	1.4104	0.7507	0.8103	1.2155	0.8801	0.7181	0.9983	1.0452	1.2521	1.0715	0.7226	0.7672	0.7974	1.171	1.1338	1.1415	0.7113	0.7868	1.0017	1.1364	0.9154	0.8447
3-hydroxyoctanoylglycine					0.2146	2.1564	0.3053	1.0275	0.3583	0.1629	1.1127	0.5347	0.4871	0.3635	0.4183	0.2305	0.1669	0.4378	0.1629	0.876	1.9416	3.5278	1.2218	1	1.7649	5.4653	1.1488	1.004	1.042	0.9825	4.4819	0.3229	1.512	0.8999	1.0682	1.7057
3-hydroxyoleate*					0.677	1.4089	0.5415	0.2868	0.7113	0.8668	0.7362	2.4754	0.8416	1.5287	0.5078	0.8265	0.2265	0.9547	2.8069	1.4714	0.5629	0.7124	1.0791	0.3466	0.8346	1.1792	2.0923	2.0315	0.6125	2.0121	1.6407	1.0453	1.8658	4.2526	1.6782	1.4745
3-hydroxyoleoylcarnitine	129637446				0.838	1.6765	0.6169	1.1083	1.618	1.9252	0.4797	0.9776	0.9455	1.4077	0.9043	0.6606	1.4969	1.4674	1.6644	0.4497	0.7899	1.6563	1.1885	0.4935	1.0224	0.9751	0.6131	0.756	1.2121	1.331	1.356	0.531	1.2562	1.6177	0.6374	0.574
3-hydroxypalmitate	15569776	928-17-6		HMDB0010734	0.8132	1.1091	0.332	0.2217	0.5981	0.5025	1.1362	2.3323	0.6507	0.97	0.3084	1.1894	0.2343	0.7857	2.8019	1.999	0.3965	0.806	0.6254	0.4665	0.6609	1.1124	2.2531	2.1634	0.5047	1.824	1.044	1.03	1.5793	4.2401	1.2602	1.6027
3-hydroxypalmitoylcarnitine	126456228			HMDB0013336	0.8728	1.668	0.4104	0.8739	1.4765	1.1087	0.5142	0.9233	0.7295	1.0988	0.7982	0.8048	1.1163	1.1936	1.5676	0.6788	1.0647	1.6976	1.0325	0.4915	1.0518	1.0338	0.5812	0.8237	0.9716	1.0878	1.0318	0.7473	1.0284	1.8485	0.4571	0.4448
3-hydroxypyridine sulfate		1955-23-3			2.924	0.7733	2.1053	0.9136	2.2509	0.9911	1.905	2.6485	1.3348	1.1555	1.7183	0.9161	1.0434	1.0089	2.4699	0.6596	0.9404	1.2931	0.9239	0.8046	1.1472	0.5106	0.3216	1.2697	0.6959	1.3511	0.2533	0.6906	0.7807	1.1195	0.4691	0.6003
3-hydroxystearate	5282907	45261-96-9		HMDB10737	0.9655	0.8452	0.4715	0.2325	0.5701	0.7599	1.5504	1.7393	0.6857	1.1629	0.4648	0.9918	0.1833	1.0402	1.7729	2.4726	0.5581	0.1833	0.7981	1.0082	1.53	1.0227	1.9894	0.1833	0.1833	1.2333	0.6632	0.9275	1.5756	2.7346	0.1833	2.1541
3-indoxyl sulfate	10258	2642-37-7		HMDB0000682	1.1116	0.503	1.6316	1.7448	1.9007	1.2939	1.6007	1.5448	1.9161	1.3037	1.516	0.7178	1.3449	0.9062	1.3353	0.3985	0.9984	0.824	1.0016	0.985	0.8853	0.4579	0.817	1.1578	0.6051	0.8749	0.5193	0.6097	0.4044	1.0172	0.5588	1.1179
3-methoxytyrosine	9307	300-48-1		HMDB0001434	1.0683	0.8087	0.9893	1.1503	1.2995	0.901	0.769	1.0034	0.8175	0.9824	1.089	1.1657	0.7967	1.0489	1.4183	0.571	0.9966	1.1371	1.2198	0.9227	0.8534	0.6575	0.7141	0.8673	1.2558	1.0725	1.2523	1.1588	0.7351	1.2154	0.9116	1.0514
3-methyladipate	12292	3058-01-03		HMDB0000555	0.1701	0.8431	0.2374	0.2183	0.4014	0.1701	0.1701	0.2124	0.4106	0.1701	0.6187	0.1701	0.1701	0.1701	0.1701	1.2115	2.5677	1.083	1.0412	1.8955	1.8963	2.3685	1.2691	1.1046	0.8521	1.1678	1.7852	0.7805	1.0994	0.6237	0.1701	0.9588
3-methylcytidine	14237477	21028-20-6		HMDB0240577	4.4866	0.8026	1.7971	1.3126	3.0966	0.4779	2.1306	1.7604	1.181	1.4245	1.6351	1.2623	1.156	0.9074	0.9382	0.6377	1.0897	0.886	0.8213	0.3498	0.9324	0.9602	0.3749	1.0398	0.3498	1.0953	0.7908	2.3879	0.3498	0.9111	0.7455	0.8872
3-methylglutarate/2-methylglutarate	12046;12284			HMDB0000752,HMDB0000422	1.0031	0.5593	1.1692	1.5688	0.9797	0.9371	1.2043	0.7167	0.9969	0.8525	1.0061	1.7027	0.8836	0.7152	1.0785	1.0111	0.656	0.6165	0.9029	1.0045	1.2025	1.1785	0.8006	0.7855	0.7288	1.0388	1.152	1.7092	0.8218	1.1046	0.5556	1.3432
3-methylhistidine	64969	368-16-1	C01152	HMDB0000479	1.2044	1.1021	0.9793	0.7745	1.0001	0.7444	1.056	0.9573	1.1444	1.1062	0.9777	0.7952	0.8556	0.742	0.9999	0.6869	1.0543	1.1648	1.209	1.2163	0.8705	1.2844	0.7287	0.6979	1.2716	0.8876	1.2588	1.9306	0.6753	1.0889	0.3651	1.1844
3-phenylpropionate (hydrocinnamate)	107	501-52-0	C05629	HMDB0000764	1.1673	0.6298	0.9978	1.4974	3.3083	0.9097	2.1205	1.2509	0.3362	2.1077	5.5024	1.1489	0.4962	0.5764	0.9215	0.535	2.4702	0.8381	0.7396	2.1307	0.2417	0.4495	2.0897	2.317	0.1746	3.0599	0.6465	0.9323	1.0022	1.5068	0.4347	1.6649
3-phosphoglycerate	724	80731-10-8	C00597	HMDB0000807	1.1712	0.7501	0.8496	0.7868	1.1958	0.801	1.0274	1.1019	1.9464	1.1247	0.8247	0.7697	1.0745	0.898	0.8182	1.8584	0.9264	0.9084	1.119	0.9586	0.9499	0.7618	1.0832	1.2972	1.231	0.8873	0.8927	1.1455	0.9973	1.0789	1.3512	1.0027
3-sulfo-L-alanine	72886	498-40-8	C00506	HMDB0002757	2.1305	0.5367	2.2644	1.1725	1	0.95	1.5575	1.564	1.8469	1.3232	1.5147	1.7548	0.9979	0.8574	1.7298	0.2479	0.4311	0.5156	0.2479	0.5341	0.2479	0.2479	0.5284	0.2479	0.2479	0.6465	0.2479	2.1859	0.2479	0.2479	0.2479	0.604
3-ureidopropionate	111	462-88-4	C02642	HMDB0000026	0.347	1.2678	0.8341	0.3184	1.1601	0.8282	1.0502	0.6434	1.1333	1.6122	1.4267	0.4502	1.1217	0.5877	0.6652	1.6258	1.7384	0.7441	0.9022	1.5466	0.4113	0.5055	2.7128	1.6916	0.7206	1.0697	0.8386	1.5264	0.9638	1.0362	0.8292	1.3874
4-cholesten-3-one	91477	601-57-0	C00599	HMDB0000921	1.8491	0.979	0.7343	1.6769	2.0095	1.4374	1.2487	1.9423	1.4851	1.4481	1.5415	1.7592	2.4008	2.2806	3.0161	1.2194	0.5858	0.8203	0.8431	0.888	0.8698	0.6751	0.3739	0.7437	0.7173	0.8047	0.9794	1.6077	0.7898	0.7313	0.3739	1
4-ethylphenol glucuronide					0.4641	2.6574	0.6121	0.0815	1.0206	0.0815	0.7588	0.7783	0.7082	0.3997	1.107	0.0815	0.2179	0.1514	0.4404	0.5955	2.5927	2.3182	1.1654	1.1781	0.4771	1.5365	3.9054	1.9443	0.2113	1.1125	1.0218	0.9794	1.4211	1.1405	0.5846	3.0392
4-ethylphenyl sulfate	20822574	123-07-9	C13637	HMDB0062551	0.7591	1.766	0.9516	0.1471	1.2915	0.1471	0.89	1.237	1.7932	0.9034	1.2604	0.1471	0.3899	0.2756	1.1277	0.6725	2.6908	2.2368	0.9912	0.7625	0.5171	1.0894	1.6724	1.9259	0.1965	1.0088	0.8104	1.3821	1.4952	0.9484	0.7365	2.8008
4-guanidinobutanoate	500	463-003;463-00-3	C01035	HMDB0003464	1.7216	1.159	0.5534	0.3085	1.6387	0.6417	0.9093	0.822	0.8042	1.6205	1.254	0.6728	0.4047	1.197	1.8422	0.541	1.6067	1.0916	1.0419	0.8743	0.4046	0.375	0.9315	1.8933	1.3344	1.1605	0.5684	1.7598	0.5808	1.9639	0.9581	1.0768
4-hydroxy-nonenal-glutathione	92970719	99927-70-5		HMDB0240578	0.7497	1.0306	0.9047	1.1858	0.8535	1.3717	1.1379	0.8182	1.2114	0.9448	0.9416	1.0262	1.0746	1.104	1.0493	0.9481	0.9989	0.7805	1.0303	1.0011	1.061	0.8155	1.2765	1.0646	0.9309	1.1219	1.1972	0.8405	0.9882	0.8427	0.9978	0.9552
4-hydroxybutyrate (GHB)	10413	502-85-2	C00989	HMDB0000710	1.6967	1.1394	2.4078	1.3444	0.6361	0.6751	2.0972	1.5073	0.7153	0.594	1.2328	0.4767	0.9193	4.5257	1.3852	1.2039	1.4301	0.7291	3.5207	0.874	1.4563	0.7646	0.6211	0.8757	0.9229	1.1328	1.0771	0.6787	0.575	1.3274	0.7542	0.8091
4-hydroxycinnamate sulfate	6070438	376374-66-2			0.89	0.2774	0.6426	0.1676	1.5472	1.3135	0.5045	0.4976	1.8685	1.303	2.0974	1.6176	1	0.6246	1.143	0.4293	1.7406	0.8878	0.8293	2.2736	0.1676	0.1676	0.5004	2.1008	0.7636	2.0162	0.1676	1.5655	0.2541	1.4494	0.2042	3.2876
4-hydroxyglutamate	439902	2485-33-8	C03079	HMDB0001344	0.8	1.6426	0.533	0.6674	1.2029	0.8655	0.4833	0.7473	0.7841	0.8835	1.0924	1.0295	0.8163	0.9282	1.0656	0.7377	1.0688	1.9513	1.3008	1.0026	1.4029	0.9974	0.5295	1.2834	1.7249	1.9248	1.597	1.5574	0.8212	2.1912	0.9715	0.9522
4-hydroxyhippurate	151012	2482-25-9		HMDB0013678	0.4301	0.4301	0.8475	0.4301	0.8054	0.4301	0.4301	0.4301	0.4301	0.4301	1.0363	0.7444	0.4301	0.4301	0.4301	0.9637	1.0375	0.4301	1.249	1.9919	0.5931	0.4802	1.2171	1.1993	0.6422	0.8553	0.4301	1.7753	0.4301	1.2755	0.4301	3.4365
4-hydroxyphenylacetate	127	156-38-7	C00642	HMDB0000020	0.789	1.5833	0.7182	1.7484	1.8993	1.2783	0.6425	1.4274	0.914	0.9465	1.4479	0.614	0.9045	0.739	1.4679	0.8013	1.0535	1.3053	2.0705	1.2157	2.0046	0.37	0.7338	1.8864	0.8191	0.899	1.2703	0.9152	0.9227	2.4193	0.9028	1.1711
4-hydroxyphenylpyruvate	979	156-39-8	C01179	HMDB0000707	1.0023	1.7067	0.9977	1.0031	1.1198	1.2783	0.9508	0.7388	0.5543	0.7204	0.4821	0.9703	1.4407	0.6104	1.0843	1.9033	0.672	0.8855	1.2334	1.8132	2.158	0.3374	1.4675	1.2238	0.7505	0.4187	3.3716	1.0094	0.7142	1.7039	0.6629	0.7319
4-imidazoleacetate	96215	645-65-8	C02835	HMDB0002024	1.1461	1.0686	0.8712	0.9328	0.6602	0.75	0.5055	0.5626	1.2513	0.9227	0.8709	1.0024	1.2147	0.8939	1.1958	1.0247	1.9684	1.468	1.6884	1.8586	0.9232	0.8763	0.9976	2.0516	1.3376	1.1339	0.969	0.9655	0.9931	1.3305	0.6098	2.7391
4-methylcatechol sulfate	54104170			HMDB0240459	0.6584	1.1477	0.7888	1.1802	2.7975	0.3981	1	1.9094	1.1171	0.7537	1.6588	0.3981	0.3981	0.6235	0.5617	0.618	2.8555	2.6257	1.0423	0.8672	0.5595	0.5546	0.9532	3.1223	0.4635	1.3507	0.8244	0.3981	1.0184	2.0916	0.8	4.164
4-methylhexanoylglycine					0.6267	0.988	0.3809	0.9775	1.2008	0.2359	1.1053	0.5202	0.6427	1.7155	1.1028	0.2708	0.7726	0.4895	0.5443	0.7914	1.6723	1.077	0.7013	2.0027	1.0578	1.2376	1.4881	1.776	1.012	1.5954	1.6776	0.625	0.5546	1.0659	0.6897	1.4012
4-vinylphenol sulfate	6426766	2628-17-3	C05627	HMDB0062775	1.3036	0.6055	1	0.1352	1.3617	0.4741	0.5047	1.3879	1.7896	1.6389	1.0902	0.7777	0.8597	0.602	1.0858	1.1915	1.1864	0.7737	1.1936	1.0529	0.3781	0.2059	0.2155	1.6904	0.837	1.2622	0.1352	0.4054	0.2956	1.4539	0.8735	1.9883
5,6-dihydrouridine	94312	5627-05-04		HMDB0000497	0.9905	0.7724	0.756	1.2803	0.9653	1.026	1.1418	0.8414	1.4021	0.911	1.0451	0.9204	1.2469	0.6829	0.7695	1.0369	0.9837	1.2967	0.98	1.0309	1.0095	1.8911	0.9785	0.8006	1.2131	1.0977	1.4399	2.2986	0.6673	0.6805	0.711	1.7002
5-(galactosylhydroxy)-L-lysine	66995551	32448-36-5			1.2978	0.9413	1.0192	1.0927	1.1845	0.9275	1.0433	1.0565	1.156	1.0076	1.0962	1.0583	1.0526	0.9836	1.0551	0.9717	0.9492	0.9207	0.8765	0.8918	0.9439	1.1051	0.8433	0.951	0.9924	0.7455	1.123	1.4401	0.701	0.9786	0.6943	1.0286
5-aminovalerate	138	660-88-8	C00431	HMDB0003355	2.8481	0.5516	1.0039	1.2526	0.8285	1.4428	2.2532	0.7834	1.1077	1.0236	0.731	1.5228	1.3775	1.0801	1.8783	0.5258	0.7918	0.5258	0.847	1.487	0.8436	0.5974	0.9961	1.1391	0.9474	0.9618	1.0961	0.9102	0.5258	1.0409	0.7284	0.8813
5-dodecenoate (12:1n7)	5312378	2430-94-6		HMDB0000529	0.3982	1.1575	0.2047	2.5274	1.2874	1.7119	0.851	0.6384	0.6958	0.624	0.7769	1.1276	0.7404	0.701	0.7486	0.6975	1.0167	0.9833	0.6446	1.107	1.6356	1.7642	1.1697	0.7157	1.3879	0.7267	2.3092	1.5708	1.6692	1.0846	0.7765	1.5511
5-hydroxyhexanoate	170748	44843-89-2		HMDB0000525,HMDB0000409	0.8949	1.0154	0.4119	1.7567	0.688	0.9567	1.8496	0.9364	0.5488	1.1928	1.8509	0.4119	0.4119	0.856	0.5857	0.8648	1.7191	1.153	0.6426	2.0603	2.5502	0.715	1.049	1.2394	0.8078	1.3957	1.6156	0.9576	0.9846	1.0508	0.5259	1.1825
5-hydroxylysine	3032849	13204-98-3	C16741	HMDB0000450	1.4287	0.8328	0.908	0.4214	1.2285	0.9429	2.2741	0.9867	1.5966	1.0133	1.2863	1.1714	0.6886	0.8609	1.2008	1.5033	1.2597	0.7195	1.2256	0.9425	0.7971	0.6967	1.0152	1.1057	1.6885	1.0456	0.8411	1.9209	0.781	0.8997	0.7961	0.7179
5-methyltetrahydrofolate (5MeTHF)	3729	68703-91-3;68792-52-9	C00440	HMDB0001396	0.5478	0.6717	0.3434	3.5407	2.302	1.4217	0.6963	1.2214	0.8815	1.4251	0.9546	1.7205	0.9648	0.9034	0.8958	0.7692	1.2771	0.9115	0.6235	1.4078	3.0975	1.7543	0.5235	1.0352	0.87	0.5951	1.5591	1.9325	1.7351	1.1103	0.4605	1.4951
5-methylthioadenosine (MTA)	439176	2457-80-9	C00170	HMDB0001173	0.4802	1.0306	0.9496	1.6078	0.461	1.1684	0.5122	1.0881	0.8857	0.4861	0.6873	0.7699	1.0023	1.1678	0.9915	1.1244	0.8468	1.3821	0.9116	0.6748	1.4367	1.9551	1.0098	0.9858	1.3994	0.5418	1.0331	0.6436	1.3024	0.9977	1.0932	1.0413
5-methyluridine (ribothymidine)	445408	1463-10-1		HMDB0000884	1.8807	0.8885	0.7192	1.2885	1.4107	1.873	0.9144	1.0901	0.6039	0.719	0.9449	1.8192	0.7322	0.6337	0.7681	0.919	1.1199	1.0093	0.9627	1.2912	1.1435	1.5541	0.7681	0.964	0.9907	0.7136	1.4994	1.8881	1.0693	1.2564	0.6955	1.1933
5-oxoproline	439685;7405	98-79-3	C01879,C02237	HMDB0000267	1.1247	0.9356	0.8969	1.2616	1.4843	0.9798	1.0948	0.9981	1.0051	1.0841	1.0596	0.9907	0.832	0.9795	0.978	0.699	1.171	1.1243	1.0583	0.9099	1.1153	1.1599	0.6777	0.9023	0.958	1.0198	1.15	1.0019	0.8708	1.1414	0.7212	0.8423
6-hydroxyindole sulfate	122198196			HMDB0000682	0.5258	0.5258	0.7755	1.3976	1.0078	1.1811	0.9381	1.1965	1.0927	0.7463	0.694	0.5258	0.6495	0.5258	0.5563	0.5258	1.092	1.0311	1.083	0.9576	0.9922	0.5258	1.0334	1.1737	0.5258	0.9604	0.5258	0.5258	0.5258	0.8251	0.5258	1.0792
6-phosphogluconate	91493	921-62-0;53411-70-4	C00345	HMDB0001316	1.6028	1.0208	1.1363	1.1763	0.9089	0.9326	1.0466	0.968	1.4082	0.7818	0.8084	1.2004	1.3096	1.254	1.2625	0.7894	0.9374	1.0453	0.82	0.7991	1.1292	0.9593	0.6225	0.8855	1.113	0.5025	1.12	1.3175	1.1296	0.9792	0.9345	0.9759
7,8-dihydrofolate	135398604	4033-27-6	C00415	HMDB0001056	1.0141	1.7727	0.8213	0.926	1.6885	0.8139	1.2278	0.9151	0.9726	1.049	1.5918	0.7781	0.9557	0.7875	0.7991	0.8036	1.3745	1.4933	1.3205	1.1308	0.886	1.2213	0.5888	0.9971	1.231	1.4814	1.2485	0.9595	0.6233	1.2107	0.6546	1.0029
7-HOCA	3081085	115538-85-7	C17337	HMDB0012458	2.1161	1.7694	1.9412	1.4846	2.0564	0.9824	2.011	0.9637	2.0073	1.321	1.6439	0.9376	1.6871	1.2264	2.1194	0.4721	0.5967	0.573	0.9299	0.9067	0.8928	0.4502	1.399	0.8762	0.4483	0.5344	1.0176	1.5639	0.4877	1.3234	0.5271	0.8731
7-ketodeoxycholate	188292	911-40-0		HMDB0000391	0.9186	1.6694	0.3521	2.8971	1.3286	0.9284	1.2615	6.1648	1.8647	1.8487	0.1598	1.1484	0.3847	2.3056	0.1603	0.7108	0.8138	1.6973	0.3275	0.8548	7.8256	1.4823	1.1181	0.727	4.8105	0.4446	1.0108	0.8932	0.9892	0.3092	0.3125	3.6749
7-methylguanine	135398679	578-76-7	C02242	HMDB0000897	1.4026	0.6477	1.2004	1.535	0.879	0.7421	0.7188	1.0213	1.1732	1.2262	1.1972	1.1915	1.1025	0.4184	0.8152	0.9805	0.8203	1.3425	0.6478	0.484	0.973	1.9875	0.8219	0.4184	1.0851	0.7059	1.7335	1.2503	1	0.6384	0.8087	1.6339
8-hydroxyoctanoate	69820	764-89-6		HMDB0061914	0.2826	2.3136	1.0323	1.2674	0.7918	0.2826	0.2826	1.917	0.6539	0.8016	0.2826	0.2826	0.7601	0.8756	1.2663	1.6441	1.3642	0.8664	0.8726	0.8227	1.568	0.2826	0.458	0.6943	1.9665	1.1029	2.6216	0.2826	2.3507	1	0.7733	0.2826
9,10-DiHOME	9966640	263399-34-4	C14828	HMDB0004704	1.5261	0.6978	0.6967	2.8469	2.3365	1.7296	1.8359	1.9338	1.0074	1.1825	1.7461	1.3232	0.8796	1	1.7357	0.3783	0.8058	0.9248	0.8565	0.6139	1.1343	0.6318	0.5559	0.8166	0.8906	1.1565	1.2511	0.9058	1.2323	0.8955	0.3783	0.7534
acetyl-CoA	444493	102029-73-2	C00024	HMDB0001206	0.5344	0.6374	0.7166	0.6642	0.915	0.5344	0.6088	0.5344	2.0823	1.526	0.8658	0.5344	0.9582	1.3181	0.6802	0.6366	1.6562	2.0641	1.0551	1.0657	0.5344	0.6611	4.0116	1.6212	1.91	2.0159	0.5344	0.5344	0.5344	1	1.4339	0.8971
acetylcarnitine (C2)	7045767	5080-50-2	C02571	HMDB0000201	0.6027	1.0101	1.1632	0.2522	0.4564	0.4002	0.861	0.9899	3.106	1.1277	0.614	0.2415	0.7435	1.8975	0.7961	3.0082	0.8687	1.4249	0.7852	2.0557	0.3463	0.4807	7.0716	1.1606	1.704	2.1985	0.5124	0.3317	1.6322	1.0827	2.6763	1.2784
acetylphosphate	186	94249-01-1	C00227	HMDB0001494	1.0727	1.3641	1.5591	1.0325	0.8069	1.0439	0.5924	0.4514	1.586	0.6922	0.4514	0.7504	1.4801	1.3608	0.4514	0.7893	1.1659	1.3916	0.6026	0.5524	0.8777	1.074	0.9592	1	1.0478	0.5528	0.7319	0.7072	1.1002	0.9368	1.5408	0.4514
aconitate [cis or trans]	643757;444212		C02341,C004174	HMDB0000958,HMDB000072	0.8337	1.3363	0.8603	0.9229	1.0779	0.8935	0.3401	0.8249	1.1772	1.4446	1.1045	0.842	0.9896	1.0427	1.2693	1.0867	0.944	1.1157	0.9193	0.8928	1.1003	0.6794	1.4363	0.7057	0.9663	1.0717	1.7593	1.505	0.9586	1.0479	0.418	1.0104
adenine	190	73-24-5	C00147	HMDB0000034	1.2678	0.9998	1.01	0.8837	1.3634	0.9182	1.3302	1.0973	0.882	1.2432	1.2103	0.8946	0.7973	0.978	1.0002	0.6491	1.317	1.008	0.8966	1.0775	0.8953	0.9689	1.0821	1.1123	0.9458	1.1188	0.9175	1.1049	0.8414	0.9771	0.8043	1.0497
adenosine	60961	58-61-7	C00212	HMDB0000050	0.6792	1.0371	0.9452	1.0763	0.8593	1.1721	1.0183	1.1064	0.9187	0.924	1.0944	0.8259	1.0156	1.016	1.0243	0.5455	1.0184	1.1133	0.9694	0.9552	0.9927	1.0073	1.0663	0.8984	1.1223	1.1045	0.8356	0.8418	1.0441	0.9919	0.8472	0.9776
2'-AMP	94136	130-49-4	C00946	HMDB0011617	4.5841	1.0375	1.3864	1.3796	2.1665	0.7848	1.1797	0.8789	1.193	1.5041	1.6764	1.7519	1.2383	1.1399	1.1491	0.6453	0.9765	0.7867	0.7501	0.5919	0.9823	1.059	0.3931	0.5496	0.6871	0.514	1.0177	3.0173	0.7684	0.9055	0.6417	0.4874
adenosine 3',5'-cyclic monophosphate (cAMP)	6076	60-92-4	C00575	HMDB0000058	0.762	1.1726	0.9314	0.8459	1.231	0.7647	1.2127	0.9169	0.8566	0.8891	1.1205	0.9865	0.9378	0.9855	0.9899	0.8858	1.2751	1.0317	1.0871	1.0674	0.9355	1.2982	1.2487	1.0478	1.0101	0.7074	1.182	1.1436	0.9724	1.333	0.828	1.0337
adenosine 3',5'-diphosphate	159296	75431-54-8	C00054	HMDB0000061	2.1576	1.0632	0.7217	0.8377	1.6126	0.5059	1.1365	1.0614	0.9482	1.1674	1.1165	0.82	0.6851	0.6355	0.5704	0.5245	1.4791	1.4084	1.0099	1.0947	0.8629	1.4883	0.8296	1.0814	0.9901	0.8047	1.1174	1.6708	0.8691	1.0855	0.5872	0.9477
3'-AMP	41211	84-21-9	C01267	HMDB0003540	0.9217	1.0694	0.5267	0.9212	1.2604	0.7448	1.3059	0.8818	0.6498	1.0201	0.8911	0.976	0.882	0.616	0.6912	0.8971	1.4542	1.0084	1.3136	1.1756	1.0409	2.4494	1.0312	0.8075	1.4079	0.6316	1.1421	1.925	1.199	1.0181	0.8461	0.9916
ADP	6022	20398-34-9	C00008	HMDB0001341	0.5282	0.7552	0.4818	0.6838	0.7845	0.7082	1.0988	1.4597	1.0034	1.0973	0.9966	0.5541	0.7063	0.7911	0.7292	0.7648	1.6587	1.3304	1.0582	1.4437	0.7321	1.1461	1.2735	1.4786	1.3111	1.026	1.0637	0.8108	0.874	1.38	0.7688	1.6299
adenosine 5'-diphosphoribose (ADP-ribose)	192	68414-18-6	C00301	HMDB0001178	0.0971	1.143	0.5264	1.1656	1.0385	0.9489	0.6059	0.5208	0.8135	1.1209	1.016	0.7103	1.2599	2.0834	1.6102	0.8021	0.9141	1.0064	0.9945	0.8402	1.2879	1.1414	1.3385	0.846	1.6521	0.7352	1.8347	0.8094	0.942	0.914	1.0055	1.1919
AMP	6083	149022-20-8	C00020	HMDB0000045	0.4626	1.6271	0.7273	0.7047	0.6256	0.9412	0.7881	0.827	0.9493	0.7087	0.9309	0.6718	0.8953	1.0886	1.0993	0.8131	1.5565	1.7411	1.3447	1.456	1.0007	1.5941	1.9437	1.2142	1.8121	0.9924	1.5207	0.9556	1.4164	1.3991	0.9993	1.7197
adenosine-5'-diphosphoglucose	16500	15839-70-0;102129-65-7	C00498	HMDB0006557	1.8855	0.9723	0.5035	0.5453	2.2703	0.4275	0.7762	1.4835	0.5049	2.6996	1.6303	0.4275	0.666	0.9489	0.4275	0.4913	1.7739	0.9146	1.2083	1.2764	0.4275	0.7695	0.4275	1.4508	0.4275	1.2272	1.3333	1.5877	0.4275	1	0.4275	0.9944
adenylosuccinate	440122	19046-78-7	C03794	HMDB0000536	0.7298	0.9879	0.4253	0.9196	1.3486	1.1432	0.6169	1.197	1.511	1.1826	1.3128	0.8681	1.1	0.9503	1.119	0.4519	0.8942	1.5272	0.7238	0.8111	1.1048	0.8346	0.785	0.613	1.153	1.1975	2.0295	1.4087	1.3234	1.0121	0.6991	0.7132
adipate	196	124-04-9	C06104	HMDB0000448	0.7522	1.1691	0.5371	0.9479	1.0533	0.8349	1.6574	0.9051	0.6859	1.0413	1.1235	1.1092	0.844	0.644	1.0787	0.7492	1.5128	1.3568	0.9438	1.1391	0.9154	1.0356	0.9509	0.8795	0.9644	1.2078	1.215	1.2825	0.9119	1.0823	0.5951	1.1049
adipoylcarnitine (C6-DC)	71296139			HMDB0061677	0.5412	1.1351	0.3159	1.3719	0.9295	1.5488	1.8434	1.2589	1.1088	0.395	1.3332	1.1513	0.7331	1.1046	0.6985	0.4837	0.8744	1.2012	0.7195	0.9074	0.7313	1.0534	1.6985	0.6399	0.6321	0.9466	1.3937	1.544	1.0571	0.6168	0.7544	1.1049
adrenate (22:4n6)	5497181;5282844	2091-25-0	C16527	HMDB0002226	1.034	0.3526	0.5059	0.2202	0.5003	0.2202	2.075	4.4607	0.7458	1.1215	0.3168	0.6195	0.2202	0.862	2.5685	2.3811	0.4629	0.5702	1.0592	0.966	0.6211	0.9314	1.8377	4.1398	0.8861	1.7432	0.5733	1.3282	1.8997	3.1118	1.9075	2.9346
AICA ribonucleotide	65110	3031-94-5	C04677	HMDB0001517	0.9757	0.7746	1.6348	1.1686	1.3272	0.7679	2.5971	1.205	1.0658	0.1473	1.2132	1.0243	0.8463	0.8607	0.7053	1.5391	0.9049	0.7223	1.2465	0.1473	1.1408	2.1621	2.1148	0.7315	0.1473	0.6035	1.6245	0.7533	0.3663	0.8262	0.7922	1.1826
ala-ile-ala	18218408				0.9879	1.2678	1.1519	1.5242	0.8337	0.8427	1.1349	0.9321	0.7599	1.1512	1.0028	0.9433	1.1313	0.9457	1.2627	0.3947	0.9341	0.8225	1.1273	1.0253	0.9431	1.1504	1.0043	1.2032	1.3422	0.6373	0.9972	1.2775	0.7648	1.2758	0.6493	0.8413
ala-leu-ala	23080784				0.7881	1.0794	0.8549	1.0181	0.8675	1.1565	0.8298	1.1421	0.995	1.0342	1.1678	0.8079	1	1.3114	1.1179	0.7136	1.1442	0.8503	1.1429	1.0043	0.9984	1.1706	0.6493	1.1297	1.0404	0.5101	0.8305	0.9052	0.7867	0.5101	0.5856	1.4256
alanine	5950	56-41-7	C00041	HMDB0000161	1.1634	0.8811	1.028	0.8426	1.0411	0.9821	0.9232	0.7968	0.9085	1.0083	0.9542	1.1787	0.9072	1.0268	1.2016	0.8744	0.9575	1.217	1.2574	1.0762	0.9964	0.9288	0.8158	1.0036	1.1232	1.0539	1.1445	1.0897	0.7688	1.043	0.7466	0.9022
alanylleucine	259583	1638-60-4		HMDB0028691	1.0127	0.6109	0.8733	1.0652	0.7494	1.0256	0.6316	0.9866	0.9937	1.1208	0.9246	0.7118	1.0063	1.1074	1.6324	1.7787	1.0742	1.2597	1.2673	1.0527	1.4278	0.6855	0.6906	1.8212	1.0911	0.7142	0.8018	0.8253	0.5405	1.844	0.7135	0.8255
allantoic acid	203	99-16-1	C00499	HMDB0001209	1.2757	0.1101	1.2578	1.0207	1.1005	0.9577	0.8763	0.9935	1.4355	1	1.2349	1.0187	1.2503	1.0819	1.1867	0.1101	0.1165	0.1771	0.1101	0.1101	0.1101	0.1101	0.1528	0.1726	0.184	0.1101	0.1414	1.0856	0.1101	0.1101	0.1101	0.1141
allantoin	204;439714;439713	97-59-6	C02350,C02348,C01551	HMDB0000462	0.9743	1.1585	0.9615	1.0624	0.9467	1.231	0.7581	0.9677	1.0064	0.9367	0.8634	1.1231	1.0259	0.7801	1.01	0.9215	0.9584	1.2092	1.1212	0.8748	1.1523	1.046	1.0252	1.001	0.9576	1.3761	1.2462	0.8937	0.999	1.2175	0.862	0.9644
alpha-CEHC glycine*					0.9454	0.5009	0.5009	0.5009	0.5009	0.5009	0.5009	0.8476	0.9403	2.1678	1.0657	0.5009	0.7865	0.6906	1.0342	0.5009	1.4903	0.9911	0.889	1.16	1.2608	0.9983	1.0017	0.5009	0.5009	1.0576	1.5097	0.7562	0.5009	1.1551	0.9404	1.5623
alpha-CMBHC glucuronide					0.9195	0.4291	0.3278	0.4299	1.4096	0.6224	1.1571	2.209	1.1784	2.3665	1.5015	0.5172	0.6666	0.7036	0.4665	0.3278	0.9607	0.8553	0.5598	1.1753	2.0541	1.3027	1.8405	0.3278	1.1324	0.994	2.0806	1.1169	0.7147	1.006	0.6346	1.1331
alpha-hydroxycaproate	99824	6064-63-7		HMDB0001624	0.9705	0.8933	0.8705	1.1393	0.6788	0.7237	1.1353	0.7127	1.0795	2.0631	0.6788	1.0706	1.3022	0.9986	0.7048	0.9555	1.1194	0.6788	0.7593	0.8563	1.1857	0.6788	0.861	1.1218	0.6788	1.1491	0.7752	1.0061	1.031	1.1187	0.7351	1.0014
alpha-hydroxyisocaproate	92779;83697;439960	10303-64-7	C03264	HMDB0000665,HMDB0000624,HMDB00746	0.422	0.422	0.422	0.422	0.4318	0.422	2.464	0.422	0.422	0.5551	0.422	0.422	0.422	0.422	0.9243	1.1398	0.7059	1.1899	2.798	0.8443	0.8816	0.935	1.571	1.2333	1.786	0.7615	2.5873	1.3209	0.644	1.065	0.75	1.2932
alpha-hydroxyisovalerate	99823	600-37-3		HMDB0000407	0.3243	1.065	0.3493	0.3062	0.3294	0.2781	0.3029	0.2941	0.3975	0.4389	0.3783	0.4088	0.4303	0.5183	0.7453	1.1868	1.2368	1.7287	1.4929	1.2481	1.3169	1.4299	1.2031	1.1404	2.1003	1.2705	1.5541	1.269	0.7799	1.1331	0.935	1.5606
alpha-ketoglutaramate*	48	18465-19-5	C00940	HMDB0001552	1.5001	0.5853	1.1141	0.991	1.0327	1.1205	1.4666	0.9348	1.3737	0.8145	1.036	0.9085	1.009	0.9312	1.5182	0.9027	0.8851	1.258	1.3807	1.1651	0.8454	1.1543	0.9703	0.7487	0.9401	0.5479	1.1564	1.2987	0.8939	1.1346	0.5316	0.6301
alpha-ketoglutarate	51	305-72-6;328-50-7;22202-68-2	C00026	HMDB0000208	0.6428	0.7138	0.6482	1.4397	0.7629	1.7403	0.9878	0.8941	0.964	0.9339	0.8821	0.7683	1.4758	1.121	0.7993	1.8272	0.9106	0.8098	1.6146	1.1338	2.8149	0.8303	1.0855	0.9928	1.0769	1.0072	1.1094	0.7146	1.1942	1.3353	1.1877	1.0625
alpha-muricholate	53477700	2393-58-0	C17647	HMDB0000506	2.2161	1.9178	0.9882	1.1625	0.7624	0.4103	1.7646	7.2503	2.6255	1.9391	0.3966	1.6838	0.048	1.4508	0.048	0.6989	1.0456	0.7718	0.5775	2.3915	2.4694	0.9551	0.364	0.6823	1.965	0.5949	1.1804	0.9622	0.4496	1	0.3779	1.6435
alpha-tocopherol	86472	59-02-9;10191-41-0	C02477	HMDB0001893	1.1251	0.8914	1.0243	1.0099	1.1132	0.7404	1.0566	1.3419	1.0664	1.0843	0.9381	0.8103	1.0855	1.0442	1.0872	0.9134	1.0406	1.0071	0.8455	0.7757	0.8644	0.9291	0.8159	1.0036	1.0635	0.9993	0.8574	0.8335	0.9767	0.8777	0.7712	1.0007
anserine	112072	10030-52-1	C01262	HMDB0000194	0.827	1.5495	0.8755	0.8506	1.0838	0.7133	1.0663	0.8117	1.1797	0.9517	0.826	0.577	0.9814	0.6843	0.596	1.0042	1.2826	1.3794	1.0364	1.1269	1.1957	1.3835	1.1722	0.9958	1.0979	2.2211	1.0441	0.8246	0.608	0.9319	0.6865	1.8876
anthranilate	227	118-92-3	C00108	HMDB0001123	1.4595	1.2855	0.5699	0.9641	2.1651	0.5927	0.9934	0.881	0.6785	1.8175	1.4929	0.7136	0.5818	0.2758	0.6689	0.5801	1.2074	1.1649	0.9773	1.3558	0.8716	1.0658	1.0585	1	0.835	1.8982	1.4722	1.3887	0.8314	1.3348	0.2758	1.3371
arabitol/xylitol	6912;94154		C00542,C01904,C00379	HMDB0002917,HMDB0001851,HMDB0000568	1.4308	1.0562	1.3032	0.9226	0.9717	0.7393	1.0662	0.794	1.1396	1.0703	1.0507	0.9495	1.0896	0.8555	1.1644	1.1985	1.1339	1.0632	1.0877	0.8593	0.8779	0.7058	0.8539	1.0792	0.9406	0.8513	1.0283	0.9014	0.4837	1.1188	0.6003	0.8876
arabonate/xylonate	122045;6602431		C00502,C05411	HMDB0000539	1.591	1.3258	1.05	1.1353	1.6449	1.1479	0.9533	0.8161	1.2396	1.0167	1.0735	0.9887	0.9632	0.776	1.3341	0.5747	0.7046	1.054	1.1257	0.6961	0.8383	0.638	0.5348	0.7017	0.7723	1.0399	1.0356	1.0113	0.4449	1.4033	0.4465	0.6271
arachidate (20:0)	10467	506-30-9	C06425	HMDB0002212	0.7808	0.8036	0.5663	0.1319	0.2944	0.3315	1.5074	3.2515	0.8309	0.962	0.2956	0.6506	0.1192	0.848	2.1331	3.6055	0.8889	1.038	1.4034	1.6335	1.1109	1.7968	4.6161	5.7158	0.8578	2.3589	0.8544	0.8963	3.8976	4.252	3.2101	4.1436
arachidonate (20:4n6)	444899	506-32-1	C00219	HMDB0001043	1.3452	0.9507	0.7418	0.9662	2.1733	0.7257	1.3579	1.2044	0.7477	1.3076	1.63	1.0703	0.893	0.8734	0.9624	0.8524	0.9556	0.9882	1.0406	1.0499	0.937	1.1479	0.4825	1.0118	0.9433	1.6123	1.3253	1.5048	0.5476	1.1858	0.6528	1.0255
arachidonoylcarnitine (C20:4)	136212424			HMDB0006455	1.0775	1.0624	1.0198	0.7555	1.3391	0.9084	1.2893	1.135	0.8814	1.082	1.4843	1.0056	0.9241	1.2431	1.3848	0.3662	1.0318	1.3293	0.9871	1.0813	0.8005	0.815	0.6962	0.806	1.0845	0.9944	0.7725	0.7207	0.5641	1.2649	0.4298	0.7499
arachidoylcarnitine (C20)*	53477833			HMDB0006460	0.2489	1.1987	0.266	0.9113	0.9639	0.7485	4.0035	1.1593	0.6168	0.5184	0.6352	0.4423	0.2678	1.0578	0.3363	0.6914	2.2461	1.3471	0.8734	1.3964	1.5844	2.9037	1.6692	1.0294	2.0916	1.8328	1.2048	0.9706	1.7981	0.8837	0.7155	1.6174
argininate*	160437	157-07-3		HMDB0003148	1.459	1.1775	0.8206	0.6424	1.5342	0.5643	1.0519	0.9527	0.897	1.6138	1.4003	0.5186	0.8197	0.733	1.0301	0.4926	1.3924	1.1882	1.0241	1.3568	0.4329	0.5213	1.1039	1.4296	0.9759	1.7444	0.6237	0.9363	0.4179	1.5542	0.6442	1.3778
arginine	6322	1119-34-2	C00062	HMDB0000517	1.2908	0.5457	1.089	0.7028	0.6397	0.7278	0.9697	1.0132	0.9453	0.8214	0.9053	0.9735	0.995	1.005	1.4006	1.69	1.0319	0.792	1.2239	1.2802	1.0791	1.0126	0.9802	1.1206	1.0848	0.7331	1.3939	0.9594	0.692	1.325	0.828	1.054
argininosuccinate	60150382	156637-58-0	C03406	HMDB0000052	2.7706	1.0315	1.2557	0.9422	1.497	0.9565	0.7988	0.8035	0.9238	1.1588	0.8672	1.3645	1.6993	1.0352	1.7414	0.9409	0.7442	0.7624	1.0459	1.024	1.5515	0.8896	0.9447	1.0104	0.9475	0.8355	2.4626	1.4674	0.4763	1.7065	0.6589	0.9896
ascorbate (Vitamin C)	54670067	134-03-2	C00072,D00018	HMDB0000044	1.0426	0.9196	1.1737	0.9846	1.1655	0.9413	1.1009	0.8137	1.1132	1.0248	1.2197	1.1223	1.0108	1.1948	1.1919	0.6419	1.1262	0.973	0.8	0.8288	0.6776	1.0821	1.14	0.9974	0.925	0.619	0.7062	1.2069	0.9775	1.0026	0.8814	0.743
ascorbic acid 2-sulfate	54676864			HMDB0060649	2.2227	0.2172	3.2568	0.9995	2.1522	1.5708	1.4806	1.1628	4.1395	2.5314	2.2756	1	2.5818	1.6021	2.2024	0.2172	0.6158	0.448	0.2172	0.2172	0.2172	0.348	0.4331	0.4341	0.2172	0.2172	0.2182	0.5503	0.5138	0.6104	0.4472	0.2172
ascorbic acid 3-sulfate*	11425365				1.6145	0.6521	2.05	1.777	1.3558	1.7236	1.5357	1.274	2.2656	1.2959	1.5892	1.4096	1.8164	1.319	1.5033	0.6771	0.7011	0.7471	0.6218	0.4774	0.7454	0.9559	1.0441	0.5521	0.7655	0.6008	0.8758	1.5355	0.7389	0.7942	0.6234	0.5429
asparagine	6267	70-47-3	C00152	HMDB0000168	1.3158	1.0075	0.9535	1.1999	1.0509	0.8905	0.9954	0.8208	1.0584	0.9976	0.9071	1.1378	0.9446	0.9642	1.0935	0.904	1.1034	1.0133	1.0024	0.9539	1.0622	1.0938	0.8147	0.9431	0.8627	0.8551	1.2966	1.171	0.7378	1.2791	0.6589	1.2505
aspartate	5960	56-84-8	C00049	HMDB0000191	1.1477	1.0032	0.8444	1.0595	1.3145	1.014	0.9158	1.0801	0.9794	1.0124	1.095	1.1587	0.8532	0.9193	1.2379	0.6935	1.0134	0.9968	0.9265	0.9103	1.0801	1.1525	0.5716	0.7934	0.9617	0.7941	1.1271	1.2493	0.876	1.0198	0.5641	0.8362
behenoyl dihydrosphingomyelin (d18:0/22:0)*	44260132			HMDB0012091	1.2575	0.998	0.6821	1.5653	1.2646	1.0318	1.3351	2.1784	1.7791	1.628	0.8803	0.9198	0.8061	0.9476	1.8677	0.6721	1.5538	1.002	0.6142	0.8932	0.8705	1.2066	0.702	2.1573	1.4508	0.9207	0.703	0.8802	1.2671	1.1341	0.9659	0.8702
behenoyl sphingomyelin (d18:1/22:0)*	44260125			HMDB0012103	0.741	1.2092	0.6139	0.689	0.6532	0.5971	0.8599	0.8574	0.8656	0.7591	0.5638	0.6469	0.6625	0.6022	0.8345	1.1093	1.7892	1.2969	1.0219	1.4358	0.9781	1.5164	1.2737	1.497	1.2909	1.4556	1.1477	0.5966	1.2109	1.0276	1.0582	1.3501
behenoylcarnitine (C22)*	71464577			HMDB0062468	0.0736	1.9457	0.0736	0.0736	0.1006	0.0736	0.2593	0.1436	0.1026	0.0806	0.1533	0.0742	0.0736	0.1592	0.0736	0.3438	1.8902	2.6029	0.8932	1.4526	1.1488	1.2929	1.9455	1.1141	1.0292	3.3775	0.9708	0.0736	1.9324	1.072	0.6931	1.0505
benzoate	243	65-85-0	C00180	HMDB0001870	1.7991	1.1126	0.9666	1.5785	1.3391	0.8776	1.1064	1.1552	0.9751	1.075	1.4777	0.8841	0.9088	1.3968	0.9971	0.8373	0.9786	1.0029	1.0909	0.8744	1.0029	0.8843	0.9671	0.9461	1.0682	1.2719	0.8356	0.9246	1.3602	0.8112	0.8109	1.0216
beta-alanine	239	56-41-7;107-95-9	C00099	HMDB0000056	1.2904	0.9175	0.8096	0.8574	1.5567	0.7391	1.1903	0.9766	1.0092	1.7279	1.4838	0.9614	0.8762	0.8498	1.1411	0.8877	1.3166	1.0619	1.2037	1.2136	0.8824	0.801	0.7295	1.3567	0.9908	1.5213	0.9501	1.582	0.6772	1.2961	0.6849	1.0775
beta-guanidinopropanoate	67701	353-09-3	C03065	HMDB0013222	1.1366	1.3203	1.0324	0.526	0.833	0.4834	1.1224	1.0217	1.0439	0.7293	0.8373	0.5737	0.7294	0.9602	0.8084	0.946	1.0157	1.1992	0.9843	1.1023	0.6511	1.2947	1.0417	1.2262	1.0625	0.7268	0.8729	1.2431	0.8105	1.1299	0.8648	1.2365
beta-hydroxyisovalerate	69362	625-08-1		HMDB0000754	0.9444	1.12	0.8983	0.9445	1.2454	0.7652	0.978	0.8316	0.8919	1.0925	1.0147	0.86	1.0645	0.8957	1.0555	0.8703	1.0299	1.3342	0.9172	0.9968	1.0511	0.8902	0.9163	1.2538	1.0032	1.3927	1.1483	1.2078	0.8604	1.2403	0.8217	1.0912
beta-hydroxyisovaleroylcarnitine		99159-87-2			1.0602	1.1748	1.0394	0.6973	1.0118	0.7437	1.0103	0.9897	1.1107	0.8964	1.0462	0.7855	0.6562	1.0142	1.0125	0.6503	1.0294	1.045	1.1732	1.2484	0.9128	0.8791	0.824	1.1025	0.9046	0.8625	0.8343	1.4085	0.8382	1.1861	0.8946	0.8349
beta-muricholate	5283853	2393-59-1	C17726	HMDB0000415	1.6496	1.2452	0.5513	2.3073	2.1256	0.778	2.238	1.4713	1.4921	2.0735	0.6136	1.1883	0.5174	0.8777	0.4709	0.7171	1.5415	0.8518	0.7157	1.253	1.1223	0.7582	0.8386	1.4795	0.6754	0.6976	1.5275	1.1455	0.4405	0.595	0.2144	1.4342
betaine	247	107-43-7	C00719	HMDB0000043	0.7519	0.9142	1.0266	0.6835	1.0091	0.7537	0.9002	0.949	0.9529	1.2848	1.1401	0.7318	0.5006	0.9865	1.134	0.7415	1.0095	1.1297	1.697	1.4228	0.8249	0.9944	0.7615	1.7735	1.4117	1.0056	0.9354	1.2678	1.1042	1.9545	1.3551	0.8419
betaine aldehyde	249	7758-31-8	C00576	HMDB0001252	1.1805	2.2767	0.4971	1.6453	2.2756	0.922	0.4109	1.38	0.6072	0.9306	1.2332	0.9748	0.8018	0.7083	1.0252	0.7191	0.9089	1.5577	1.1346	0.7931	1.7955	1.1684	0.5055	0.8657	0.8561	1.5446	1.5794	1.3391	1.2019	1.9379	0.6654	0.7011
bilirubin	5280352	635-65-4	C00486	HMDB0000054	1.2621	0.8084	0.9232	0.7545	1.2081	1.0299	1.3623	1.1577	1.1484	1.0288	1.0716	1.2162	0.9643	0.7471	0.6519	0.5986	0.755	1.073	0.7819	1.1376	1.0645	2.2435	1.0016	0.5132	0.9984	1.1668	1.3164	0.851	0.4597	0.8855	0.4644	0.7907
biliverdin	5280353	55482-27-4;55482-27-4	C00500	HMDB0001008	0.9706	0.7244	1.0715	0.7291	1.2548	1.005	1.3409	1.8819	1.7177	0.9883	1.0142	0.9207	1.0776	0.981	0.8268	1.8797	0.9813	1.0565	0.8016	1.1697	0.9451	1.5481	0.9162	0.7433	1.4074	1.4047	1.2162	1.848	0.7791	0.6786	0.657	0.995
biopterin	445040	22150-76-1	C06313	HMDB0000468	1.1391	1.4135	0.3745	0.9266	1.1752	1.0711	1.1855	1.8156	0.748	0.8879	0.9214	0.5422	0.5047	0.7996	0.9431	0.9935	1.0065	1.1428	1.7869	0.6637	1.2913	1.1065	0.9139	1.8386	0.8422	1.8237	2.7218	0.538	0.7109	1.4952	0.7427	1.9003
butyryl/isobutyryl CoA	122283;265		C00136	HMDB0001088	0.2734	0.3824	1.306	1.0036	0.7813	0.6424	1.7718	1.6525	1.5658	0.9851	1.7045	0.5702	0.8815	1.8345	1.0367	0.4561	1.4794	1.1547	1.0562	0.8704	0.6416	0.984	1.5376	1.4308	2.2061	0.2707	0.9292	0.781	0.8373	0.9964	1.1597	1.1145
butyrylcarnitine (C4)	439829	25576-40-3	C02862	HMDB0002013	0.6037	0.6831	1.3127	0.7174	0.6879	0.4854	1.6324	1.3711	1.1199	0.7874	1.1186	0.3991	0.5003	1.5292	1.1865	0.6386	1.1743	1.08	1	1.1328	0.5951	0.9236	1.1946	1.1027	2.0461	0.3991	0.5214	0.6524	0.7195	1.247	0.9629	1.0698
butyrylglycine (C4)	88412	20208-73-5		HMDB0000808	1.1236	1.0249	1.1868	1.5244	1.0203	0.2267	1.2388	0.6465	0.6628	1.3536	1.5248	0.3084	0.5729	0.8711	0.9219	0.7392	1.0411	0.8327	1.3792	0.9955	0.5522	0.8695	1.5648	0.9752	1.0584	0.8646	1.1676	1.1196	0.6534	0.8546	1.3401	1.0045
C-glycosyltryptophan	10981970	180509-18-6		HMDB0240296	0.7937	1.1285	0.7958	0.9957	1.1457	0.7145	0.9317	0.8629	0.8631	0.9227	1.0576	0.9197	0.8391	0.8375	0.9864	1.0043	1.3333	1.1722	1.2632	1.1968	1.1627	1.2373	1.1174	0.8985	1.1892	1.1885	1.3392	1.1553	0.8236	0.9519	0.5391	1.2344
campesterol	173183	474-62-4	C01789	HMDB0002869	0.8069	0.9101	1.0956	0.6488	0.9432	0.7153	0.8534	1.102	1.0761	0.8105	0.8541	0.9262	1	0.903	1.0068	1.0688	1.1547	1.3774	0.9363	0.6488	0.948	1.4772	1.3923	1.5801	1.3051	1.1046	1.0469	0.7157	1.3314	0.9723	0.8123	1.1146
caprate (10:0)	2969	334-48-5	C01571	HMDB0000511	1.3558	0.9041	0.9602	1.7298	1.5596	0.7386	1.2878	1.3083	0.8875	1.1892	2.0067	0.7731	0.9919	1.1543	1.1193	1.0081	1.0544	1.0714	1.1827	0.8309	0.8129	0.8213	0.6897	1.0934	0.8427	1.1929	0.8706	0.9409	1.3224	0.7689	0.7727	0.8077
caproate (6:0)	8892	142-62-1	C01585	HMDB0000535	4.9932	0.7325	1.4327	1.1924	0.5267	0.5267	1.578	1.1111	1.1751	0.9989	1.1806	1.0223	0.5267	1.1917	1.1391	0.8132	0.9428	0.9527	1.2265	0.9493	0.7056	1.0011	0.7645	0.9464	0.7489	0.9886	1.0172	2.3509	0.842	0.7212	0.8932	1.3448
carboxyethyl-GABA	2572	4386-03-02		HMDB0002201	1.2704	0.9189	0.9607	1.0904	0.9925	1.194	0.9669	0.7505	0.9778	1.4528	1.3529	1.191	1.1043	0.6988	1.3141	0.9465	1.1112	0.8479	0.9592	0.875	0.9857	1.0075	1.5258	1.0479	1.1827	1.1106	1.2282	0.9594	1.0218	0.8499	0.7924	0.8425
carnitine	288	461-05-2	C00487,C00308	HMDB0000062	1.2778	1.1076	1.2816	0.6576	0.7973	1.2151	1.3551	0.859	1.3194	1.1218	1.0056	0.8705	1.2581	1.2837	1.1892	0.825	1.0035	0.9448	1.0728	1.1678	0.7715	0.5688	0.8697	0.9646	1.1101	0.9965	0.7649	0.7942	0.7444	1.1513	0.7677	0.8583
carotene diol (1)					1.1301	0.6118	1.259	0.6342	0.9157	0.6642	1.3276	1.0036	0.8047	1.0482	1.2918	1.0151	1.4637	1.6426	1.7059	0.5389	1.0876	1.0623	0.9344	0.5323	1.0457	1.0699	1.0034	0.5976	1.0648	0.7186	0.8555	0.7994	0.7545	0.8288	0.8331	0.9966
catechol sulfate	3083879	4918-96-1		HMDB0059724	0.2929	1.0198	1.1875	1.4138	1.9256	0.2777	0.9802	1.4508	0.6937	0.8627	2.3414	0.2801	0.1883	0.2532	0.4943	0.497	3.0147	1.4982	1.3251	1.3696	0.3626	0.5063	2.1272	3.1413	0.1421	2.9652	0.884	0.4883	1.4195	1.7764	0.6593	3.3683
ceramide (d16:1/24:1, d18:1/22:1)*					0.5098	2.0936	0.439	0.0682	0.6585	0.0682	0.3395	0.9464	0.6105	0.3674	0.3821	0.0682	0.0682	0.3945	0.4609	1.3722	1.3691	1.2726	1.0536	1.5968	0.5374	1.1625	1.5444	1.3587	0.1425	1.3308	1.3606	0.0682	1.379	0.8212	1.2868	1.5893
ceramide (d18:1/14:0, d16:1/16:0)*					1.531	0.9029	1.6461	2.188	1.7872	1.7848	1.7268	2.1306	1.7262	1.055	1.4776	1.665	1.8649	1.2082	1.7779	0.3781	0.8036	0.6621	0.7075	0.4304	0.7157	0.6633	0.5126	0.9214	0.8687	0.6753	0.7265	2.4011	0.928	1.0113	0.9887	0.5559
ceramide (d18:1/17:0, d17:1/18:0)*					1.1434	0.43	0.5847	1.1127	1.1276	1.1072	1.5297	1.9898	1.074	0.917	0.9328	0.8947	1	0.8926	0.8942	0.43	0.43	0.43	0.43	0.43	0.43	0.43	0.43	0.4496	0.43	0.43	0.43	1.1352	0.43	0.43	0.43	0.43
ceramide (d18:2/24:1, d18:1/24:2)*					1.3825	0.9743	1.0014	0.9949	1.2496	0.7488	1.1613	1.56	1.4039	1.1818	1.0695	0.8632	1.2242	1.2142	1.6209	0.8176	0.9986	0.971	0.7166	0.6801	0.917	0.7917	0.6827	1.2669	1.0327	0.9369	0.8881	2.0081	1.2069	0.985	1.3181	0.7313
cholate	221493	81-25-4	C00695	HMDB0000619	1.7251	1.2122	0.7351	7.8514	1.7334	1.4105	2.7825	10.8305	5.5028	3.9712	0.4832	6.7136	0.8411	4.6051	0.8512	0.4563	0.5684	0.985	0.1451	0.7389	5.3127	0.8726	0.5379	0.3809	6.0255	0.493	1.015	1.78	0.6971	0.2391	0.2598	3.4401
cholate sulfate					0.2551	1	0.3351	1.8458	0.34	1.0395	0.69	1.8203	1.2274	0.2551	0.2551	0.9246	0.6437	0.4201	0.2804	0.4775	0.596	0.8318	0.2551	1.2071	7.3791	1.6292	1.7893	0.2551	2.6031	0.2551	2.6607	0.2551	1.0108	0.2551	0.487	3.866
cholesterol	6432564;11025495;5997	57-88-5	C00187	HMDB0000067	1.0579	0.8591	0.7665	0.9625	1.0205	0.9426	1.138	1.1308	0.9031	1.0447	0.8835	0.9105	0.9119	1.0864	1.2755	0.9577	1.1502	0.9598	1.0315	0.9463	0.9748	1.142	1.0295	1.226	1.0648	1.1139	0.9008	1.0737	0.9035	0.9795	0.8572	1.0735
cholesterol sulfate	65076	2864-50-8	C18043	HMDB00653	1.7588	0.739	1.2135	1.9291	2.1428	1.4187	1.7968	1.4653	1.2707	2.3577	1.8229	2.3241	1.7573	1.3574	1.7595	0.5146	0.9295	0.7555	0.7419	0.7345	0.5924	0.6304	0.6275	0.9415	0.8787	0.9266	0.6537	1.226	0.9908	1.0092	0.6949	0.6589
choline	305	67-48-1	C00114	HMDB0000097	0.8699	1.0092	0.7014	0.9929	1.3496	0.6347	0.8784	1.0589	0.6994	0.9998	1.0111	1.0356	0.6727	0.7537	0.9026	0.7959	1.0907	1.0988	1.0002	1.0177	0.9054	1.347	0.8606	0.9666	1.0988	1.011	1.0877	1.1537	0.9089	1.0779	0.7521	1.0701
phosphocholine	1014	72556-74-2	C00588	HMDB0001565	0.7679	1.2985	1.0914	0.7821	1.5672	1.3941	1.519	1.1508	0.958	0.8559	1.271	1.6637	0.7822	0.7152	1.0174	0.709	1.2574	0.8568	1.0249	1.0217	0.7582	0.9826	1.2631	0.8914	0.9271	0.9169	0.6873	1.0419	2.0835	1.1454	0.709	0.923
cinnamoylglycine	709625	16534-24-0		HMDB0011621	0.1552	1.3804	0.6977	1.0998	0.673	0.3647	0.5561	1.0509	0.6289	0.5868	0.7653	0.6392	0.1777	0.2695	0.2451	1.484	3.9626	3.3373	2.469	2.5146	0.735	2.0907	2.9523	3.0774	0.493	4.3829	2.6881	0.5155	1.8638	2.1929	0.9491	4.6599
cis-3,4-methyleneheptanoylglycine					0.2184	1.1822	0.6821	1.5045	1.4935	1.4332	1.3014	1.1338	1.744	0.4621	0.9784	1.0618	0.7974	0.9646	0.4829	0.4039	0.9275	1.5143	0.5469	0.9289	1.4185	1.819	1.469	0.5647	0.9915	0.6284	1.3024	1.0085	1.2118	0.7778	0.5807	2.0926
cis-4-decenoylcarnitine (C10:1)	57357170	98930-66-6		HMDB0013205	0.4568	0.3749	1.2945	1.1596	1.063	0.3749	1.4461	1.8511	1.3973	0.526	1.0919	0.3749	1.0496	1.0064	1.0598	0.9094	0.9936	0.3749	0.8588	0.7908	0.9236	0.6434	0.3749	0.9463	1.0465	1.5239	0.3749	1.1971	0.8587	0.8563	0.3749	0.8801
citrate	311	77-92-9	C00158	HMDB0000094	0.8272	1.2931	0.6154	1.0527	0.9771	1.0943	0.4807	1.0221	1.1595	1.2713	0.946	0.8154	1.0604	0.9766	1.1742	0.7449	0.8972	1.2041	0.8246	0.8259	1.0363	0.8558	1.107	0.8202	1.0314	1.1823	1.4857	1.1457	1.2188	0.9779	0.7265	0.8177
citrulline	9750	372-75-8	C00327	HMDB0000904	1.3173	1.0882	1.5513	0.6029	1.2456	0.4178	0.8527	0.6341	0.9175	1.4331	1.2472	0.5344	0.7063	0.6893	0.9659	0.8523	1.0585	1.2603	1.6896	1.2234	0.562	0.7439	1.0546	1.6118	1.0855	1.0341	0.63	0.9275	0.6151	1.3505	0.895	1.5061
CoA-glutathione*	46873828	6477-52-7	C00920		0.6834	0.8577	0.6595	1.0611	1.6175	0.7847	1.1847	1.2826	1.165	1.5625	1.5736	0.7695	0.9774	0.8916	0.7889	0.7023	1.2508	1.4092	0.9344	1.0191	0.7069	1.1512	0.9493	0.9809	1.1474	1.2201	1.1764	1.2579	0.766	0.965	0.7003	1.0635
CoA	87642	85-61-0;18439-24-2	C00010	HMDB0001423	0.8912	0.918	1.2191	1.3578	1.1821	1.2043	1.2589	1.0783	1.4356	1.594	1.4263	1.2434	1.5005	1.5544	1.3791	0.502	0.9937	0.6668	0.8137	0.8447	0.7189	0.6726	1.1197	1.0165	1.0063	0.3974	0.9131	0.9334	0.8224	0.7771	0.7523	0.7245
corticosterone	5753	50-22-6	C02140	HMDB0001547	0.9489	2.7842	0.2973	0.1606	1.7143	0.673	1.3099	0.8273	0.8331	0.2897	1.9542	0.147	1.1391	0.6885	0.798	0.5346	2.6652	1.1248	0.4895	1.9035	0.3823	0.9659	2.1489	2.4499	1.6926	1.0341	1.037	2.3876	0.0858	2.7597	0.286	3.1855
creatine	586	57-00-1	C00300	HMDB0000064	1.0192	1.0478	1.1349	0.7704	0.9421	0.8718	1.1696	1.1231	1.1976	0.9145	1.0186	0.8253	1.0663	1.1087	0.8636	1.0041	0.9789	1.0921	0.9977	0.9491	1.0023	0.7106	0.8928	1.0274	1.0302	1.1611	0.8983	0.6964	0.7861	1.0031	0.8591	0.9265
creatinine	588	60-27-5	C00791	HMDB0000562	0.9898	1.0641	1.0215	0.8752	1.0335	0.8814	1.1107	1.2396	1.4054	0.958	0.9025	0.9557	1.2167	0.966	0.8305	0.9259	1.1325	1.3161	0.8753	0.9577	1.0379	1.204	0.9348	1.0102	1.1333	1.0178	1.0773	0.8395	0.7923	0.8071	0.7292	1.2973
cystathionine	439258	535-34-2	C02291	HMDB0000099	1.5775	0.6747	1.3287	0.6429	1.6506	0.6806	0.6051	0.7945	1.0025	1.4087	1.571	1.112	0.6172	0.6433	1.6475	0.5553	0.9734	0.9897	1.8069	1.3083	0.4089	0.5533	0.6157	1.5487	0.9975	1.1138	1.0537	1.0517	0.5175	1.6006	0.5575	1.3027
cysteine	5862	52-90-4;56-89-3	C00097	HMDB0000574	1.1988	0.9952	1.4101	1.2532	1.5309	0.9632	1.3651	0.9988	1.1019	1.4796	1.3242	1.4479	0.8089	1.0012	1.3738	0.4998	1.1664	0.7745	0.7435	1.1309	0.6926	0.79	0.9208	1.068	0.8181	0.7405	0.7898	1.16	0.7053	0.9872	0.4356	1.1143
cysteine sulfinic acid	109	207121-48-0	C00606	HMDB0000996	2.1659	0.3063	1.6006	1	1.1704	0.6788	1.4931	1.0716	1.4459	1.7295	1.5661	1.6209	0.831	0.755	1.5346	0.1238	0.1238	0.1238	0.1238	0.37	0.1238	0.1238	0.1991	0.1435	0.1238	0.3339	0.2496	1.214	0.1238	0.1238	0.1238	0.6696
cysteine-glutathione disulfide	3080690	13081-14-6	R00900	HMDB0000656	0.8681	1.1783	1.0462	1.0017	1.2081	0.6599	1.403	0.9088	0.9754	0.9959	0.939	1.0014	0.3938	0.5362	0.7605	1.0928	1.3218	1.5314	1.1112	1.1125	0.8214	1.2206	0.9379	1.1435	0.9173	1.1887	1.5095	0.9986	0.3749	0.7677	0.3868	1.2513
cysteinylglycine	439498	19246-18-5	C01419	HMDB0000078	1.2394	0.9714	1.4368	1.4169	0.9606	1.5739	1.3223	0.9714	1.2846	1.2181	1.0012	1.7777	1.4258	1.4569	1.8124	0.4087	0.9944	0.533	0.7876	1.0953	0.8838	0.5807	1.2255	0.962	0.9988	0.538	0.7413	1.0134	1.0111	0.9985	0.625	0.8926
cytidine	6175	65-46-3	C00475	HMDB0000089	1.6063	1.0385	0.9655	1.2583	1.5217	0.9413	1.319	1.1228	0.8223	1.0336	1.1863	1.3328	1.0376	0.898	0.9161	0.7517	0.8346	0.8877	0.8865	0.9503	0.9294	1.2569	0.8819	0.6179	0.9504	1.4243	1.1176	1.3157	0.998	0.8297	1.002	1.0152
CDP-choline	13804	33818-15-4	C00307	HMDB0001413	1.0148	1.034	0.9217	0.5497	1.1534	0.715	1.05	1.0062	0.9938	1.0274	1.2731	0.866	0.7218	1.0224	0.8065	0.8709	1.3218	1.1778	0.9423	1.116	0.8219	1.1801	1.0423	1.0401	0.9231	0.9427	0.9676	1.2537	0.7426	0.9735	0.6737	1.0641
CMP	6131	63-37-6	C00055	HMDB0000095	0.9995	1.1354	0.8312	0.863	1.0978	0.8262	1.0363	1.0467	0.9826	0.8422	1.1412	0.848	1.0116	1.0573	1.0491	0.5855	1.0381	1.0005	0.9255	0.9532	0.7577	1.1082	0.9852	0.7787	1.0761	0.8545	1.1511	1.145	0.8548	1.0171	0.7268	1.053
CDP-ethanolamine	123727	72842-05-8	C00570	HMDB0001564	0.8297	1.1428	0.8604	0.5943	1.049	0.5421	0.8073	1.0098	0.968	0.7708	1.5415	0.7103	0.7081	0.8947	0.6413	1.0648	1.4213	1.5683	0.9436	1.1915	0.7798	1.8617	1.1072	1.1612	1.2597	0.9057	0.9902	1.7389	0.769	1.1926	1.0394	1.3105
cytosine	597	71-30-7	C00380	HMDB0000630	1.0703	0.7145	0.7412	0.6272	0.9608	0.7221	0.9845	0.8367	1.0991	1.2555	1.0509	0.9769	1.0414	0.9925	1.1441	1.1693	1.0875	1.7218	0.9968	0.8364	1.127	0.8788	1.0225	1.121	0.8863	1.771	0.7502	1.063	0.9183	1.0032	0.8106	1.0448
daidzein	5281708	486-66-8	C10208	HMDB0003312	1.3804	0.4887	1.1856	0.1718	1.5085	0.7322	0.526	0.4351	0.4683	1.4174	1.0928	1.0715	0.9027	0.8207	2.0469	1.215	0.9967	0.5915	1.9132	1.533	0.8004	0.1512	0.66	2.5153	1.2847	2.1124	0.1092	1.0001	0.9999	2.1396	0.9175	1.1479
daidzein 7-O-glucuronide	11316354			HMDB41718	1.0056	0.5473	1.8633	0.1834	1.7809	0.675	0.7015	1.0189	0.5665	1.0122	1.3292	0.8436	1.0636	0.594	1.0394	0.6767	1.0587	0.7179	1.6254	1.6371	0.5169	0.1795	0.5475	1.262	1.7218	1.7247	0.097	1.3505	0.7872	2.1853	0.7514	0.9944
daidzein sulfate (2)	12114465				1.4527	0.4114	1.8336	0.428	1.5891	1.7309	0.6227	0.9772	1.0463	1.3818	1.2868	2.1137	1.5807	1.0031	2.3797	0.6962	0.8745	0.686	0.9147	1.3946	0.7649	0.0901	0.6514	1.5393	1.2072	1.7758	0.0805	0.9969	0.9124	1.3665	0.657	0.9741
decanoylcarnitine (C10)	10245190	1492-27-9		HMDB0000651	1.6644	0.8052	1.0561	0.8033	1.2495	0.5472	1.259	1.1124	0.974	1.2096	1.1168	0.3384	0.6448	0.9301	0.9145	1.0013	0.9987	1.111	1.0341	2.1861	0.6601	0.4253	0.9294	2.1063	1.1905	0.9425	0.6002	0.8735	1.1569	1.3463	1.2691	0.7043
dehydroascorbate	440667	490-83-5	C05422	HMDB0001264	1.0098	0.9309	1.0483	0.837	0.7734	0.927	0.9927	1.065	1.3589	0.6806	0.9899	1.029	0.9786	0.7701	1.1339	1.1765	1.3053	1.5934	1.0925	0.8395	1.0073	1.2847	1.1866	1.0869	1.1105	0.6966	1.0155	0.8458	0.7332	0.9369	0.6617	0.6441
deoxycarnitine	22620	6249-56-5	C01181	HMDB0001161	0.976	0.9104	1.512	1.2352	0.7914	1.3428	1.3423	0.7896	1.7421	1.019	0.839	1.6849	1.2778	1.2475	0.981	0.6209	0.9391	0.9807	0.8216	0.888	0.8176	0.9198	1.1983	1.0913	1.0218	1.1571	1.3344	1.0776	1.062	0.8149	0.7116	0.8958
deoxycholate	222528;440355	83-44-3	C04483	HMDB0000626	8.5026	0.5165	0.5044	1.0745	3.3302	0.9792	3.207	1.6718	1.2374	6.0623	1.3119	0.9135	1.6695	1.2515	0.7422	0.3519	0.6419	1.1613	0.2514	0.6664	1.5863	0.4911	0.4385	0.7373	0.5088	4.2767	1.0208	1.3471	0.4195	0.6764	0.2226	1.8647
diacylglycerol (16:1/18:2 [2], 16:0/18:3 [1])*					0.6142	1.4169	0.6985	1.1602	1.0807	2.2349	1.0842	1.6061	0.9961	0.4682	0.9122	1.2996	0.8567	0.733	0.61	1.0039	1.2059	1.601	0.5823	1.1708	0.7997	1.0309	1.55	0.9193	0.9834	0.792	1.0731	0.8228	1.0222	0.8433	0.8057	1.63
dihomolinoleate (20:2n6)	6439848	2091-39-6	C16525	HMDB0005060	1.0253	0.4384	0.6934	0.1196	0.5002	0.312	2.5351	8.9254	0.8923	0.9931	0.2974	0.5406	0.079	0.9527	3.0267	2.9324	0.4372	0.5858	1.0069	1.0648	0.9882	1.0909	2.5583	4.583	0.7878	1.8095	0.5953	1.0216	3.1047	3.58	2.4746	4.4321
dihomolinolenate (20:3n3 or 3n6)	5280581	17046-59-2	C03242	HMDB0002925	1.1111	0.53	0.5729	0.0809	0.6133	0.3602	2.0405	3.7251	0.747	0.9379	0.2474	0.795	0.0519	0.735	2.0862	2.3598	0.5702	0.7101	1.0621	1.1921	0.9089	1.2696	2.51	3.2396	0.8364	1.6272	0.7808	1.2178	2.2146	2.643	1.7621	3.233
dihomo-linolenoylcarnitine (C20:3n3 or 6)*					1.1043	1.5551	0.8734	0.4545	1.3478	0.6828	0.8246	0.9754	0.6649	0.8353	1.0195	0.5896	0.6344	0.9758	1.1876	0.6053	1.2968	1.7655	1.3833	1.1501	1.1465	0.789	1.1141	1.1022	1.0592	1.1684	0.9805	0.6099	0.7408	1.3717	0.5954	1.0459
dihomo-linoleoylcarnitine (C20:2)*					0.4676	0.8372	0.7893	2.2165	0.9819	0.8511	2.6686	1.9398	1.0418	0.9009	1.1724	0.6999	0.6618	1.7981	1.0181	0.4676	1.111	0.5993	0.7021	0.8185	1.3663	1.4428	1.261	0.7038	1.1995	2.1276	1.316	0.8198	0.9131	1.1154	0.4676	0.979
dihydrobiopterin	135402011	6779-87-9	C00268	HMDB0000038	1.5653	1.3485	0.9153	1.0034	1.4331	0.9428	1.2724	0.9966	0.9922	1.2473	1.1411	0.8706	0.8248	1.0977	1.2683	0.5987	1.5007	1.4004	1.0563	0.9782	0.9508	0.9953	0.8818	1.2202	0.8497	0.7878	1.1353	0.7046	1.0124	1.3999	0.614	0.8569
dihydroferulic acid sulfate	187489			HMDB0041724	0.5529	0.2742	2.1639	0.9225	1.49	1.557	0.8502	1.8898	1	0.6337	2.8205	0.6238	0.5639	0.5349	1.853	0.4446	1.0902	1.4005	0.2742	1.1724	0.6418	0.2742	0.5688	1.2784	0.2742	4.6931	0.2742	0.9982	1.8118	1.1845	0.2742	0.6954
dihydroxyacetone phosphate (DHAP)	668	102783-56-2	C00111	HMDB0001473	1.0839	1.3211	0.9759	1.2849	0.5152	1.0241	0.5341	0.7458	1.1329	0.7369	0.6481	0.8242	1.9421	1.3838	1.5159	1.4889	0.8265	1.0557	1.1375	0.8207	1.6152	0.7831	0.849	0.8593	0.8942	0.9257	1.1459	0.811	1.3927	1.1468	1.6183	0.6185
dimethylarginine (ADMA + SDMA)	123831;169148	102783-24-4	C21189,C03626	HMDB0003334,HMDB0001539	2.4065	1.4767	1.0486	1.3434	1.7824	0.5971	1.0765	0.9159	0.9411	1.2855	1.1275	1.2129	0.8276	0.7904	1.1919	0.6247	1.0673	0.8943	1.0636	0.9842	1.0967	0.9268	0.4675	1.014	0.9318	0.812	0.97	1.631	0.574	1.4285	0.588	0.986
dimethylglycine	673	1118-68-9	C03626	HMDB0000092	1.4076	0.9832	1.3163	0.3718	1.5253	0.6006	1.2421	0.7998	1.0534	1.4819	1.2233	1.0332	0.8143	0.8672	1.4399	0.7713	1.0605	0.7918	1.4443	1.1824	0.5231	0.6925	0.8213	1.0112	1.1883	0.9888	0.8154	1.3761	0.584	1.4274	0.8218	0.9439
docosadienoate (22:2n6)	5282807	7370-49-2	C16533	HMDB0061714	0.5762	0.8806	0.3496	0.0804	0.2728	0.1758	1.3361	2.8458	0.5509	0.5124	0.2062	0.2844	0.0489	0.5428	1.2625	3.4755	0.9281	1.0719	1.5543	2.0893	1.381	1.3343	3.6154	3.9586	0.84	2.8497	0.8122	0.8802	3.6385	2.3283	2.0168	4.391
docosahexaenoate (DHA; 22:6n3)	445580	6217-54-5	C06429	HMDB0002183	1.1961	0.426	0.6267	0.0855	0.5989	0.4174	2.5665	3.499	0.9184	1.3919	0.2312	1.0095	0.0426	0.8735	2.0752	2.2548	0.4911	0.5363	0.8217	0.982	0.9905	1.7523	2.3384	2.8189	0.7827	1.4761	0.8333	1.1606	2.4295	2.4457	1.3902	2.873
docosahexaenoylcarnitine (C22:6)*					1.0866	0.996	1.0234	0.839	1.5966	0.9558	1.0555	0.9943	1.0551	1.3406	1.1345	0.8998	0.7416	1.0634	1.6098	0.4349	1.2241	1.8815	1.4157	0.921	1.004	0.7719	0.6302	1.1225	1.4178	0.6701	0.626	0.79	0.9393	1.9089	0.4739	0.6871
docosapentaenoate (DPA; 22:5n3)	6441454	2234-74-4	C16513	HMDB0001976,HMDB0006528	1.0196	0.4563	0.4565	0.112	0.5892	0.4203	2.9903	7.0274	0.6283	1.0376	0.2528	0.9804	0.0765	0.6618	3.0196	2.6758	0.5238	0.6098	0.8732	1.0789	0.7543	1.524	2.811	5.1826	0.8976	1.744	0.5929	1.3585	2.6246	4.3122	1.8808	5.181
docosapentaenoate (n6 DPA; 22:5n6)	6441454	25182-74-5	C16513	HMDB0001976	0.9928	0.461	0.5709	0.0563	0.5879	0.2041	1.7683	2.7259	0.9213	1.5249	0.2715	0.696	0.037	1.0072	2.0601	1.7971	0.5591	0.5583	1.3548	1.0895	0.8766	0.8901	1.6511	2.9512	0.8305	1.5619	0.598	1.7133	1.9894	2.6037	1.7926	2.5732
docosatrienoate (22:3n3)	5312556	59708-86-0	C16534	HMDB0002823	0.4553	0.6825	0.3024	0.0444	0.3082	0.1901	1.3835	3.8653	0.4757	0.5666	0.2203	0.3625	0.0444	0.5989	1.4708	3.4321	0.7553	0.9254	1.3268	1.7869	1	1.2953	4.1424	4.9271	0.8232	2.3736	0.7626	1.0078	3.1796	2.9855	1.9457	5.0947
docosatrienoate (22:3n6)*	75955220				1.2182	0.3366	0.7597	0.034	0.3748	0.21	1.8156	7.1115	1	1.1432	0.2614	0.381	0.034	0.7327	2.8367	2.8716	0.3458	0.4795	1.2538	0.8385	0.5601	0.525	1.7611	5.7492	0.8317	1.4429	0.3271	1.4407	2.3691	3.8412	3.1545	2.7127
eicosapentaenoate (EPA; 20:5n3)	446284	10-2005-9;10417-94-4	C06428	HMDB0001999	1.1264	0.5045	0.4753	0.2635	1.0006	0.6592	3.6304	6.4089	0.6334	0.9089	0.3189	1.9783	0.114	0.6457	2.4092	2.248	0.4833	0.6434	0.6307	0.9994	0.6693	1.9749	3.2048	3.7739	0.7301	1.5414	0.7615	1.3509	2.1212	3.5106	1.3053	5.4057
eicosenoate (20:1n9 or 1n11)	5282769;5282768;94159		C16526	HMDB0002231,HMDB0062436	0.7895	0.7373	0.7053	0.0942	0.3659	0.2904	1.8119	7.0917	0.7754	0.6997	0.2615	0.4099	0.0639	0.6292	1.9105	4.7638	0.668	0.9053	1.6031	1.8648	1.0332	1.3789	4.3383	5.9318	1.0524	2.7395	0.7112	0.9668	3.6419	3.6088	3.6232	5.845
eicosenoylcarnitine (C20:1)*					0.3432	0.7951	0.6082	2.3684	1.0574	1.004	3.3652	1.7909	0.8368	0.6636	1.0299	0.5543	0.5618	1.3341	0.5	0.3698	1.101	0.6089	0.4714	0.836	1.0756	1.3538	2.0966	0.6105	1	1.9435	1.4047	1.0206	1.1071	0.5859	0.3432	0.9885
enterolactone	114739	78473-71-9	C18165	HMDB0006101	0.2502	1.0991	0.1704	0.1704	0.2242	0.1914	0.344	1.2969	0.4665	0.3671	0.196	0.1704	0.1704	0.1704	0.1704	1.7538	1	0.8164	1.6774	2.0874	1.5937	0.8961	5.0902	4.3713	0.8668	2.3851	1.1977	0.184	0.9101	1.1099	1.2492	4.0458
enterolactone sulfate				HMDB0240506,HMDB0240505	0.4203	1.9092	0.3463	0.6438	0.6161	0.7275	0.3251	0.8022	0.794	0.5449	0.506	0.2311	0.3513	0.437	0.2537	0.6597	1.756	2.0901	2.6983	2.7242	1.8453	1.1978	2.5158	2.5298	2.2697	2.5167	2.3838	0.3806	1.203	1.5614	1.9308	3.5541
equol	91469	531-95-3;94105-90-5	C14131	HMDB0002209	0.3029	0.9851	0.2923	0.2923	0.2923	0.2923	0.9027	0.6417	0.4886	0.3258	0.3026	0.2923	0.2923	0.2923	0.3204	2.7023	1.6846	0.6185	1.6989	1.5564	1.4333	1.253	6.9918	5.6251	0.3976	1.8423	0.6613	0.516	1.4464	1.5352	1.0149	4.2942
equol glucuronide	46781484				0.3298	1.5669	0.5993	0.4986	0.8274	0.5794	1.1187	0.9563	0.9677	0.3904	0.9955	0.2774	0.1949	0.1687	0.2313	0.9163	2.7049	1.7023	1.9796	1.9533	1.3845	2.0573	5.5767	2.5309	1.0045	2.1353	1.4821	0.8055	1.4169	1.4443	0.7398	2.7277
equol sulfate					0.5357	1.4301	0.5627	0.7344	0.9108	0.6997	0.9318	0.6874	0.9273	0.5152	1.108	0.4223	0.3369	0.2254	0.4894	0.9729	1.9397	1.5475	1.77	1.8231	1.1034	1.3535	2.9768	2.2575	0.8954	1.5474	1.0271	1.1034	1.149	1.3196	0.9015	2.2637
ergothioneine	5351619	58511-63-0	C05570	HMDB0003045	0.8293	1.5186	0.9869	1.0165	0.7366	1.1333	1.1203	0.7589	1.0269	0.4706	0.568	1.02	0.9078	0.776	0.7461	0.7704	1.2427	1.2708	1.0518	1.4574	1.0296	1.0506	1.0573	0.9936	0.9612	1.0704	0.8821	0.442	0.8918	1.0064	0.8394	1.212
erucate (22:1n9)	8216;5281116	112-86-7	C08316	HMDB0002068	0.2888	1.0576	0.3241	0.0478	0.1918	0.1938	0.9913	1.7424	0.4119	0.3497	0.1389	0.2442	0.046	0.4441	0.7363	4.6589	1.0133	1.1299	1.553	2.1334	1.0087	1.3893	4.9138	3.6438	0.8602	2.73	0.6855	0.5824	3.1761	1.6092	2.3088	5.6719
erucoylcarnitine (C22:1)*					0.122	2.4484	0.2555	0.6917	0.6332	0.5087	2.8334	1	0.8043	0.4015	0.8063	0.122	0.1685	0.6763	0.2569	0.5566	2.2218	3.1762	1.2232	1.9298	2.1677	1.7801	3.1551	1.374	1.8636	4.7452	1.3514	0.5204	3.2385	0.8858	0.8485	2.3075
erythritol	222285	149-32-6	C00503	HMDB0002994	1.206	1.2748	1.3136	0.9225	0.6454	1.0902	1.0005	0.6737	1.2304	0.7821	0.8942	0.9177	0.9995	0.7358	1.0657	1.448	1.3714	0.8909	0.7459	1.2783	1.4872	0.8465	1.2391	1.1106	1.1604	0.8434	1.5341	0.803	0.7071	0.7665	0.8231	1.0666
erythronate*	2781043	88759-55-1		HMDB0000613	1.399	1.0221	1.1911	0.8848	0.8647	0.9112	1.1445	0.8556	1.0524	0.7726	0.9488	1.1824	1.0474	1.0587	1.3862	0.8924	0.9522	1.1771	0.9449	1.0275	0.8344	0.8926	1.0983	0.9394	1.1808	0.9067	1.1905	1.2604	0.6684	1.0804	0.5631	0.9779
ethyl alpha-glucopyranoside	11127487	34625-23-5		HMDB0029968	0.9441	1.0559	1.3835	0.5676	1.2719	0.6962	0.3556	1.9229	2.0562	0.695	5.1687	1.4827	0.7188	0.1401	1.2884	0.9369	0.8756	3.395	1.858	0.8539	0.6916	1.4931	0.5085	1.1629	0.6755	16.4799	1.0944	2.1415	0.6134	1.5926	0.9224	0.3476
ethyl beta-glucopyranoside	121667			HMDB0029968	0.9197	1.1545	1.1467	1.2558	1.2689	0.6336	0.364	0.991	1.3146	0.8535	1.0785	0.9438	1.3408	0.8293	1.0065	0.4757	1.4698	1.1031	0.9184	0.934	0.6993	1.1252	0.7063	1.1383	1.3214	0.9935	0.6378	0.7313	1.2922	1.3239	1.2774	0.8412
ethyl glucuronide	18392195	17685-04-0		HMDB0010325	0.4447	2.0335	1.4379	0.4447	0.7236	0.4447	0.4447	0.4447	0.4609	0.4447	3.2338	0.4447	0.4783	0.4447	0.4447	0.5324	1.3041	0.9965	1.0035	0.4447	0.4447	0.7713	0.5815	0.4447	1.0246	1.2834	0.8498	0.4447	0.5082	1.8705	1.5972	1.4557
ethylmalonate	11756	601-75-2		HMDB0000622	2.6622	0.9227	2.1359	0.785	0.7542	0.4035	1.0629	0.7653	0.7121	1.3327	1.7128	0.3794	0.9577	1.3559	1.649	1.2421	1.0274	0.7699	1.782	0.9726	0.7038	0.6548	2.1784	1.5715	1.2928	0.6092	0.9449	1.2195	0.8316	1.0867	1.628	0.7541
ferulic acid 4-sulfate	6305574	86321-29-1		HMDB0029200	0.6928	0.4366	0.9542	0.2466	1.5409	1.2026	0.4189	0.6816	1.0331	1.0275	1.3954	1.1252	0.9103	0.6652	1.1228	0.4937	1.0815	0.9871	1.0296	1.3573	0.2682	0.2525	0.6879	1.5309	1.0129	1.8166	0.0988	1.8145	0.3626	1.2247	0.4646	1.0534
FAD	643975	146-14-5;84366-81-4	C00016	HMDB0001248	1.001	0.9838	0.8622	1.1192	1.3696	0.899	1.1297	1.0844	1.0005	1.2985	1.2682	1.0551	1.0528	0.9447	0.9847	0.5606	1.2537	1.1071	0.9983	0.9695	0.95	1.0027	0.8909	0.9168	1.0596	1.0072	1.0385	0.9726	0.8619	0.9995	0.6882	0.8986
FMN	643976	130-40-5	C00061	HMDB0001520	0.9022	0.8289	0.707	1.0199	1.4035	0.8135	1.0746	1.0093	0.9345	1.3896	1.3707	1.0465	1.0009	0.8811	0.8314	0.6362	1.0617	1.0128	1.0172	1.0075	0.9623	1.2118	0.9106	0.8642	1.0078	1.1505	0.9434	1.0472	0.8676	0.9991	0.6244	0.9121
folate	6037	59-30-3	C00504	HMDB0000121	1.7597	1.6306	1.7872	1.1704	0.728	0.9383	1.4461	1.6241	0.9473	0.4281	1.3835	0.3966	1.2444	1.5599	1.3614	0.7106	0.5935	1.2147	1.4579	0.8226	0.4349	1.4203	0.8074	1.0017	1.2419	1.2993	0.3615	0.5872	0.9983	0.6979	0.8843	0.7677
formiminoglutamate	439233	816-90-0	C00439	HMDB0000854	2.4055	0.7043	1.5571	3.1918	3.7036	0.9675	0.9625	1.3588	1.7899	1.9962	0.9302	1.6232	1.025	1.5739	1.3367	0.5811	0.7308	0.7439	0.682	0.6604	1.4655	0.8371	0.5665	0.8306	0.8486	1.4844	0.975	1.4603	0.6397	1.2801	0.9348	1.2089
fructose	2723872	57-48-7	C00095	HMDB0000660	1.1389	1.887	1.4738	1.6063	0.1942	1.5652	0.4351	0.3811	1.0021	0.1947	0.4423	1.4917	1.6672	1.2337	1.5101	0.7857	0.4351	1.0044	0.9979	0.3861	1.6142	0.8703	1.4487	0.526	1.1267	0.5023	1.0804	0.583	1.0285	0.6784	0.9909	0.5162
Isobar: hexose diphosphates	10404962;3934;90658350;124383956;4453;445557;718;82400		C05378,C00354,C01231	HMDB0003514,HMDB0001058	1.1	1.1133	1.0796	0.5442	1.0056	0.5657	0.8348	1.2867	1.4501	1.0428	1.0032	0.3083	1.2773	1.1833	1.03	0.8635	0.9137	1.1017	1.0478	0.7837	0.9315	0.9508	0.6076	0.9595	1.0924	0.6414	0.7607	0.8211	0.9968	1.0744	1.3101	0.8226
fructose 6-phosphate	440641	103213-47-4	C05345	HMDB0003971	1.0782	1.4827	0.9784	0.9629	0.7155	0.9147	0.4686	0.8067	1.6433	0.596	1.0171	0.5205	1.6094	1.1028	1.037	1.0775	0.8926	1.6669	1.0973	0.5188	1.163	0.9788	0.8072	0.9073	1.0266	1.0816	0.9829	0.7146	1.173	1.1975	1.2038	0.6044
fructosyllysine	9839580	21291-40-7		HMDB0034879	1.6746	0.9084	1.4261	1.1576	0.8815	0.8375	1.0912	1.547	1.0812	0.9193	1.1449	1.1771	0.6522	0.6453	0.8186	0.9721	1.0431	1.0286	1.1243	0.9264	0.8377	1.2626	0.767	1.5971	0.9519	0.8698	1.5584	1.0068	0.6296	0.9932	0.4543	1.5641
fumarate	444972	100-17-8	C00122	HMDB0000134	1.1999	0.9336	0.8184	1.0489	0.7807	1.3416	0.6143	0.9906	1.0942	1.0094	0.9672	0.9484	1.1882	0.963	1.3929	0.7878	0.8975	1.0947	1.0156	1.0303	1.46	0.8476	0.7331	0.9392	1.1837	1.0179	1.1576	0.9604	1.0353	1.0894	0.8544	0.8418
galactonate	12310779;128869	299-28-5	C15930,C00880	HMDB0000565	0.6183	0.8653	0.7878	1.5826	1.613	1.3497	1.6023	0.4741	0.7974	0.7839	0.8706	3.2821	0.6811	0.896	0.9198	0.8725	1.34	2.4537	1.1816	1.0482	0.991	1.6712	1.8402	0.9577	0.7883	1.4753	1.1333	1.3259	0.9381	1.0425	0.5087	1.009
galactose 1-phosphate	123912	19046-60-7	C00446	HMDB0000645	0.1517	1.0749	1.3919	1.3854	0.1517	1.5034	0.6926	0.1517	1.9241	0.1517	0.1517	1.7164	0.669	0.9225	0.3185	1.0147	0.1517	0.1517	1.2406	0.4878	1.2272	0.1517	1.013	0.1517	0.987	0.3877	0.8554	1.077	0.6225	0.1517	0.3016	0.1517
gamma-carboxyglutamate	40772	56271-99-9		HMDB0041900	1.2256	0.8568	1.0028	0.9874	1.4713	0.5764	1.1033	1.0539	1.1905	1.2858	1.34	0.8086	0.8326	1.0013	0.8986	0.6659	1.1073	0.983	1.0622	0.9238	0.8117	1.2026	0.7482	0.9987	1.1071	0.836	1.1827	1.2999	0.6818	1.0807	0.7251	0.8861
gamma-glutamyl-epsilon-lysine	7015685	17105-15-6		HMDB0003869	1.0771	1.0258	0.9587	1.0537	1.3631	0.748	0.9093	0.8862	0.9911	1.0512	1.1099	0.9664	0.8899	0.8535	0.9064	1.0709	0.9789	1.0104	1.179	0.9587	1.0538	1.2768	0.8998	1.0089	1.1729	0.8001	1.1588	1.3466	0.6099	1.1624	0.6054	0.9729
gamma-glutamylalanine	440103	5875-41-2	C03738	HMDB0029142	0.5534	0.9135	0.5534	0.5534	0.5534	0.5866	0.5814	0.5534	0.5534	0.5534	0.7225	0.9863	0.5534	1.5345	0.7826	1.346	0.8731	1.7092	2.4784	1.4261	3.0608	1.3133	0.572	1	2.9267	0.5574	2.5612	1.0731	0.9543	1.5131	1.768	0.8159
gamma-glutamylcysteine	123938	636-58-8	C00669	HMDB0001049	0.8344	0.8366	0.8332	1.0021	0.6828	1.1462	1.2325	0.5592	0.6536	0.8994	0.7009	1.6351	0.862	1.2204	1.663	0.5812	1.4643	0.6323	1.2943	1.7225	1.4702	0.895	1.2167	1.3596	1.3182	0.3546	1.4169	0.8688	0.9979	1.2138	0.5177	1.1798
gamma-glutamylglutamate	92865	1116-22-9	C05282	HMDB0011737	1.0581	1.1766	0.9672	0.9753	1.1562	0.9191	1.0301	1.0046	1.0532	0.9674	1.1684	0.8991	0.8795	0.8307	0.9222	0.7534	1.04	0.9954	1.1765	1.0788	0.9094	1.0108	0.5612	1.0394	0.9786	1.0233	1.0089	1.0336	0.6761	1.1662	0.7715	0.9533
gamma-glutamylglutamine	150914	10148-81-9	C05283	HMDB0011738	0.6675	1.026	0.8234	1.3214	0.8102	0.9453	0.8165	0.9433	0.9955	0.7098	1.0562	1.0815	0.6128	0.8105	0.9986	0.9843	1.2547	1.1421	1.3159	1.3057	1.6169	1.3486	0.8267	1.0014	1.1079	0.8641	1.468	1.2337	0.7406	1.3809	0.9399	1.1672
gamma-glutamylglycine	100099	1948-29-4		HMDB0011667	0.4862	1.2846	0.1986	0.3337	0.3115	0.4633	0.548	0.3597	0.3377	0.3254	0.3033	0.3461	0.4688	1.2932	0.4689	2.9667	2.8463	3.9227	3.5702	1.235	3.4015	4.0881	0.9382	1.5281	4.3845	0.5923	3.3463	0.5037	1.9336	2.7721	3.4515	1.0618
gamma-glutamylhistidine	7017195	37460-15-4		HMDB0029151	0.8174	1.0321	0.7439	1.2304	1.3141	0.5934	0.6102	0.7657	0.6918	0.6895	0.8418	0.7889	0.5242	0.7008	0.8419	0.7655	1.2844	1.482	1.5873	1.1485	1.1125	1.4559	1.0435	0.9679	1.2529	1.54	1.4068	1.051	0.5401	1.1593	0.7413	1.2517
gamma-glutamylisoleucine*	22885096			HMDB0011170	0.8315	0.6291	0.4523	1.4175	1.0562	1.3561	0.69	0.9196	0.7226	0.7388	0.842	0.8515	1.0707	1.4958	0.9862	1.1096	1.1869	1.592	1.1249	0.6999	1.858	2.4952	0.9857	0.7064	1.6172	0.6115	2.6718	1.0016	0.8952	1.3766	1.0782	0.9984
gamma-glutamylleucine	151023	2566-39-4		HMDB0011171	0.816	0.8373	0.5958	1.2313	1.2673	0.8865	0.7812	0.8957	0.6521	0.8022	0.8878	0.6896	0.7868	1.2417	0.9902	1.1713	1.6421	2.0161	1.7377	0.9232	1.5368	1.9341	1.0637	1.321	1.7876	0.7611	1.7099	0.8493	1.0098	2.0038	1.113	0.9864
gamma-glutamylphenylalanine	111299	7432-24-8		HMDB0000594	0.762	1.1713	0.6841	0.9	1.1468	0.8254	0.7416	0.6692	0.7137	0.9436	1.0036	0.862	0.6145	0.9756	0.9964	0.9271	1.6637	1.689	1.6061	1.3321	0.9384	1.1747	1.1138	1.7431	1.371	1.3675	1.2119	1.0839	0.8827	1.973	0.6571	1.439
gamma-glutamylthreonine	76078708	5652-48-2		HMDB0029159	0.6353	1.1287	0.2419	0.5413	0.3788	0.7387	0.8118	0.492	0.4263	0.4091	0.3752	0.4737	0.5634	0.8713	0.5342	1.9677	3.9753	3.2025	5.0188	2.5704	3.6968	5.9926	2.0191	2.6803	3.4103	0.8683	7.987	0.4215	2.5747	4.9689	1.7665	1.3361
gamma-glutamyltryptophan	3989307	66471-20-3		HMDB0029160	0.5781	1.7509	0.5781	0.8744	1.8595	0.6283	0.6431	0.799	0.5781	0.5781	0.8881	0.7234	0.5781	0.5781	0.5781	0.5781	2.0083	1.499	0.8927	1.4423	0.5781	1.2329	1.9979	1.8863	0.9781	1.3073	0.9629	0.7846	1	1.4347	0.5781	1.7016
gamma-glutamylvaline	7015683	2746-34-1		HMDB0011172	0.5751	0.9326	0.3575	1.1969	0.64	1.0345	0.5122	0.6892	0.4953	0.5273	0.6648	0.6531	0.8801	1.105	0.6027	1.9095	1.5584	2.0484	1.439	1.1382	2.4757	4.56	1.3684	0.9855	1.8257	0.7406	4.568	0.8523	0.9815	1.3295	1.0145	1.2776
gamma-tocopherol/beta-tocopherol			C14152,C02483	HMDB0006335,HMDB0001492	0.7562	0.6974	1.2625	2.6258	1.5536	1.2345	0.9099	1.2622	1.0478	0.8977	0.9048	0.8986	0.9686	1.0191	1.779	0.753	1.367	0.6623	1.0301	0.7232	0.9597	0.5263	1.0414	1.575	0.6021	1.094	0.599	1.4157	1.4842	0.9744	0.9809	1.146
genistein	5280961	446-72-0	C06563	HMDB0003217	2.0989	0.3741	1.4318	0.1557	1.552	0.9199	0.7665	0.9416	0.6162	1.7212	0.951	1.269	0.5193	0.7826	2.5822	1.8596	0.8896	0.4786	1.5198	1.7497	0.8916	0.1288	0.9825	3.3063	1.0961	2.674	0.105	1.0175	1.4019	2.5113	0.8784	1.1818
genistein glucuronide*					1.1857	0.5087	1.6704	0.2925	1.7243	1.0311	0.8541	1.3099	0.858	1.272	1.268	0.9552	0.9955	0.6613	1.1272	0.7897	1.0045	0.5816	1.7464	1.905	0.7849	0.2047	0.7238	1.3992	1.7856	1.9448	0.1556	1.578	0.7591	2.2051	0.6349	0.8761
genistein sulfate*					1.416	0.3889	1.3963	0.2909	1.4397	1.29	1.0332	0.7303	0.6521	1.5664	1.1789	1.3065	0.9901	0.7569	1.946	0.8023	0.9714	0.7466	1.0393	1.6131	0.7251	0.1103	0.6511	1.4255	1.0099	1.702	0.1158	0.88	0.922	1.5833	0.5571	1.0825
gluconate	3085666;10690	527-07-1	C00257	HMDB0000625	1.4943	1.0604	0.986	1.2973	2.2471	1.0511	0.9956	0.6939	0.7262	0.75	0.9431	1.6821	0.7225	0.8587	1.7169	0.4904	2.97	1.1429	1.1686	0.5567	1.4239	0.8711	0.3762	1.1249	1.0311	0.3525	0.7951	1.0044	0.7621	3.1935	1.2965	0.5611
glucose	5793	50-99-7	C00031	HMDB0000122	1.0472	1.1263	1.3094	1.2418	0.4062	1.2778	1.0209	0.7304	1.1613	0.597	0.7159	1.3098	1.125	1.0401	1.1054	1.0259	0.9189	0.9547	0.9679	0.7547	1.2108	0.9734	1.2813	0.884	1.1604	0.5695	1.2222	0.6977	0.9791	0.8314	0.8844	0.8235
glucose 6-phosphate	5958	103192-55-8	C00092	HMDB0001401	0.3277	1.0707	1.5294	1.5893	0.2164	1.7889	0.5297	0.4533	1.6004	0.2045	0.2303	1.2064	2.1454	1.5877	1.2641	1.3593	0.4214	1.0607	0.7478	0.4143	1.6484	0.9393	1.6651	0.6875	1.3913	0.4335	0.7583	0.5018	1.7542	0.4518	2.1841	0.7059
glucuronate	441478;94715;23677976;65041;444791	207300-70-7	C16245	HMDB0000127	0.751	1.2059	1.1742	1.1147	0.8025	0.5174	1.0652	0.8526	0.5377	0.5616	1.1505	0.9809	0.98	0.602	0.5247	0.7113	0.9154	1.0641	1.3303	1.0996	0.5876	1.6003	1.628	0.8271	1.0315	0.7676	1.1902	1.3568	1.0191	1.4131	0.924	1.2696
glutamate	33032	56-86-0	C00025,C00217	HMDB0000148	1.0599	1.0326	0.9887	1.3005	1.1473	0.9783	0.9961	1.0039	1.0661	1.0149	1.0764	0.9914	0.8313	1.2138	1.1166	0.7402	0.9414	0.9639	1.0468	0.9155	1.0855	1.0877	0.9076	0.8153	0.9909	0.8104	1.0842	1.0865	0.8478	1.0131	0.7273	0.909
glutamate, gamma-methyl ester	68662	1499-55-4;1499-55-4		HMDB0061715	0.9611	0.9945	1.105	1.2057	0.8748	1.0579	1.021	1.0402	1.1002	0.8472	0.9758	0.9337	0.8535	1.0396	1.0733	0.9759	1.0012	0.9852	1.1202	0.9988	1.2801	1.2044	1.1064	0.8867	0.9599	0.8242	1.1975	1.0519	0.9204	0.9625	0.8015	1.0302
glutamine	5961	56-85-9	C00064	HMDB0000641	0.9352	0.425	1.4473	1.7433	0.6131	1.9113	1.3354	1.0718	1.4577	0.5972	0.5551	1.3415	0.8044	0.9522	1.3274	1.3212	1.0981	0.9783	0.9221	1.2685	1.6594	1.8012	1.1042	0.7673	0.5561	0.51	1.8739	0.8714	1.0216	0.7184	0.8656	0.8859
glutamine_degradant*		2353-44-8			1.572	1.1915	1.0399	0.6653	0.6416	0.7821	0.8251	0.7582	1.2491	0.8072	1.0008	0.7358	0.9852	1.4269	1.0026	0.8485	1.0402	1.1736	1.1381	0.8618	0.6723	0.8329	1.2767	1.3006	1.3461	0.7806	0.8959	1.5099	0.7101	1.1996	1.3278	0.9992
glutarate (C5-DC)	743;4418048	110-94-1	C00489	HMDB0000661	1.8493	0.7951	0.76	0.8541	0.98	0.4417	1.8198	0.552	1.02	1.0922	1.2608	0.7209	1.8067	1.1416	1.611	0.4512	0.7272	0.2301	1.2643	1.0825	0.4405	0.5072	1.5001	0.7706	1.4138	0.916	1.0828	1.5387	0.3213	1.2308	0.6649	1.1237
glutarylcarnitine (C5-DC)	71317118	102636-82-8		HMDB0013130	0.9186	0.9103	0.9046	0.9797	1.3745	1.3745	1.2032	1.0573	1.3075	1.1948	1.2018	1.5881	1.1811	1.1176	1.0331	0.5353	1.0415	0.8315	0.7892	0.9942	0.7875	0.8791	1.0259	0.6784	0.9816	0.9913	1.3347	1.6073	0.8533	0.8241	0.6692	1.0058
glutathione, oxidized (GSSG)	65359	103239-24-3	D00031,C00127	HMDB0003337	1.0264	1.1373	0.8295	0.9651	1.0651	0.8688	1.0505	0.9622	1.1209	0.9301	1.0065	0.7824	0.8077	0.8594	1.0429	0.6604	1.1214	1.108	1.0458	1.0195	0.771	0.8687	1.0253	0.983	0.8798	1.3351	0.9946	1.0054	0.7992	1.0191	0.6154	1.0563
glutathione, reduced (GSH)	124886	70-18-8	D00014,C00051	HMDB0000125	1.1052	0.9317	1.1993	1.2589	1.011	1.319	1.1985	0.9084	1.1312	1.1709	0.9951	1.2877	1.2582	1.2402	1.3857	0.4495	1.0049	0.6077	0.9306	1.0118	0.8009	0.6685	1.1613	0.9692	0.9534	0.6371	0.8528	0.9383	1.0381	0.9848	0.6388	0.9434
glycerate	752;439194	600-19-1	C00258	HMDB0006372,HMDB0000139	1.09	1.101	1.0893	0.967	0.8685	0.9225	1.1675	0.99	1.0024	0.7973	0.9423	1.0829	0.9976	1.0255	1.1455	0.9117	1.0715	1.12	0.9452	1.0232	0.8489	1.1367	1.1157	0.9789	1.0601	0.796	1.0443	1.2581	0.829	0.9594	0.6784	0.9431
glycerol	753	56-81-5	C00116	HMDB0000131	0.8387	0.8164	0.8954	1.1006	1.0545	1.0049	1.1709	1.0351	0.6791	0.9702	1.4623	1.0861	0.5737	0.7761	0.9767	0.7786	1.0825	0.8345	1.2194	1.0707	0.9204	1.1194	0.7766	1.059	1.2811	0.9951	1.4157	1.0817	0.7939	0.9287	0.5337	1.1161
glycerol 3-phosphate	754	29849-82-9	C0093	HMDB0000126	1.0031	0.4476	1.7858	0.5149	1.492	0.7912	2.1295	1.6459	1.4172	1.3361	1.4962	0.8273	0.7384	1.4976	0.9395	0.5295	2.1804	0.772	0.5636	1.3632	0.5531	2.0197	1.1451	0.9697	0.9969	0.3642	1.1177	1.0545	0.9101	0.8636	0.8923	1.5017
glycerophosphoethanolamine	123874	33049-08-0	C01233	HMDB0000114	0.4351	1.0042	0.6697	0.4792	0.4596	0.6178	0.3402	0.6749	0.8534	1.0203	1.0273	0.6295	0.8553	1.9467	1.3856	1.4723	1.01	1.3614	0.9746	0.8413	0.9958	2.0027	1.3424	0.8033	1.8505	0.4813	1.5683	0.4551	1.4132	1.2241	1.5723	2.8238
glycerophosphoglycerol	54575349		C03274	HMDB0240316	0.7723	1.009	1.0982	1.2197	0.8694	1.4106	0.4247	0.912	1.5008	1.4471	1.2644	0.991	1.6006	1.6529	1.7835	0.7994	0.8056	1.0452	0.8888	0.7232	0.9892	1.0367	1.198	0.6474	1.1806	0.5029	1.3398	0.5322	0.7593	0.9656	0.7754	1.1955
glycerophosphoinositol*	167572	16824-65-0			1.3684	0.8999	1.257	0.5596	1.1696	0.5719	1.2906	0.6884	0.8842	1.0048	0.929	0.744	0.6401	0.6365	0.9663	0.9952	1.2717	1.1978	1.4338	1.2366	0.7036	1.1312	0.9776	1.1822	0.9358	1.0615	1.3742	1.0411	0.6825	1.0148	0.5495	1.109
glycerophosphorylcholine (GPC)	71920	28319-77-9	C00670	HMDB0000086	0.474	1.0043	0.9135	0.6049	0.3128	0.9459	0.4427	0.7458	1.0436	0.8652	0.932	0.7073	1.203	1.9761	1.5118	1.4841	0.9118	1.0537	0.9977	0.8645	1.1821	1.5138	1.4788	0.8164	1.4536	0.558	1.612	0.4443	1.2997	1.0023	1.2622	1.7883
glycerophosphoserine*	3081457				1.2504	1.0339	1.2872	0.8552	1.3707	0.785	1.1521	1.0054	1.3542	1.2189	1.2046	0.7325	0.92	1.1646	1.173	0.9209	0.9946	1.1591	0.9776	0.9543	0.7444	1.1337	1.0959	0.8695	1.0509	0.798	1.2067	0.926	0.7834	0.9547	0.6283	0.9826
glycine	750	56-40-6	C00037	HMDB0000123	1.1155	1.1181	1.0026	1.075	1.0583	0.6749	0.9744	0.9415	0.9164	1.0647	1.0588	0.924	0.8948	0.9332	1.0353	0.764	1.1185	1.1497	1.1498	0.9439	0.9073	1.0933	0.8097	0.8973	1.0522	1.0055	1.1266	0.9815	0.7596	0.9974	0.7799	1.0736
glycine conjugate of C10H14O2 (1)*					0.5382	1.2824	1.0826	0.8251	0.8661	0.3058	0.5432	0.5893	1.0669	0.6469	0.7337	0.559	0.8092	0.8593	0.652	1.1581	1.3303	2.0457	1.6846	0.918	1.3906	2.3487	0.9453	0.892	1.7257	1.0547	1.6063	0.7407	2.1344	1.3652	1.5841	1.5301
glycitein	5317750	40957-83-3	C14536	HMDB0005781	1.5116	0.3453	1.8221	0.2563	2.4856	0.9849	1.2886	0.6969	0.6642	1.6066	2.2908	1.1721	0.6748	0.3816	1.8936	1.1247	0.6489	0.4315	1.1395	1.2374	0.8999	0.1364	0.7594	2.8711	0.7447	2.6394	0.1364	1.0151	0.7083	2.0575	0.1364	0.6279
glyco-beta-muricholate					0.2738	1.3293	0.6564	2.343	1.4914	0.7112	0.5818	7.0631	1.7225	2.2584	0.8894	1.9711	0.424	2.3441	2.2745	0.3977	0.4945	1.1413	1.3357	1.8958	1.512	0.6001	0.4398	0.9916	1.5335	1.0084	0.9325	0.3309	0.8757	0.5331	0.2698	1.931
glycocholate	10140	475-31-0;863-57-0	C01921	HMDB0000138	0.5644	0.9423	0.9103	1.1617	1.871	0.5643	1.3402	7.3955	2.1289	2.7459	1.0249	1.6346	0.4307	1.7036	1.0468	0.4538	0.6548	1.0172	0.5591	1.3088	1.7407	0.9349	0.5456	0.8957	1.8956	0.5963	0.999	1.001	0.4324	0.5408	0.4037	2.5646
glycocholenate sulfate*					0.1934	1.3378	0.2743	0.9293	1.0181	1.1264	0.5632	2.2318	1.413	1.3037	0.7638	1.2051	0.454	0.801	0.5009	0.7247	1.1961	1.4246	0.6873	0.6567	1.9583	1.5285	0.9819	0.7974	1.8966	1.0958	1.4842	0.8927	1.1693	0.7574	0.5738	1.0438
glycodeoxycholate	3035026	360-65-6	C05464	HMDB00631	0.8542	0.2752	0.2752	0.2752	0.654	0.2752	0.2752	1.524	1.0621	1.6834	0.2752	0.2752	0.7651	1	0.9763	0.2752	0.2752	0.2752	0.7868	1.0969	1.1515	0.2752	0.2752	0.2752	0.2752	0.3561	1.4737	0.2752	0.2752	0.2752	0.2752	2.5273
glycosyl ceramide (d18:1/20:0, d16:1/22:0)*					0.7261	0.8121	0.9992	1.0324	1.3424	1.0187	1.4146	1.3976	1.5682	1.4621	0.9553	0.8201	0.9705	1.0008	1.5508	0.9941	0.9544	0.8953	1.0284	0.4864	1.3416	1.3188	0.4634	1.8695	1.2912	0.8656	0.691	0.872	0.9118	1.4417	1.2698	0.4744
glycosyl ceramide (d18:2/24:1, d18:1/24:2)*					1.0988	0.4255	0.7562	0.8902	1.152	0.6247	1.0993	1.7766	1.3434	1.5801	1.08	0.5385	1.1452	1.4179	2.2144	0.7131	0.6754	0.7064	0.5494	0.4255	1.1202	0.7861	0.4255	1.3299	1.148	0.5038	0.4255	1.3297	0.7452	0.6414	0.92	0.4255
glycosyl-N-palmitoyl-sphingosine (d18:1/16:0)					1.0219	0.6791	1.0139	1.1454	1.2345	1.053	1.389	1.4374	1.2905	0.9861	1.1207	1.3852	1.2538	1.1806	1.5677	0.9265	0.7854	0.8738	0.6453	0.5199	1.0874	0.977	0.5589	0.9141	1.1673	0.6007	0.6349	1.5723	0.9742	0.8053	0.9502	0.4737
glycosyl-N-stearoyl-sphingosine (d18:1/18:0)					1.0536	0.2158	1.4426	1.5856	1.6321	1.5709	2.2371	2.39	2.0613	1.8235	1.4286	1.1093	1.168	1.3219	1.3379	0.4704	0.4303	0.3353	0.2979	0.2158	0.4355	0.4257	0.2158	0.9464	0.7466	0.2315	0.3139	1.2555	0.445	0.8138	0.6486	0.2268
glycoursodeoxycholate	12310288	64480-66-6		HMDB0000708	1.0013	0.7821	0.5684	0.9907	1.3882	0.4831	0.633	3.3872	1.1314	2.0287	0.6977	0.8374	0.8192	0.9987	1.4056	0.4831	0.4831	0.5987	1.8026	1.0255	1.3357	0.6678	0.4831	0.4831	0.4831	1.3306	1.0708	0.4831	0.4831	0.5662	0.4831	2.0026
glycylisoleucine	259613	19461-38-2		HMDB0028844	1.2677	0.8853	0.9276	1.0836	0.7563	0.909	0.8661	0.9552	1.1441	1.1309	1.099	0.7637	0.8013	0.9955	1.0568	0.8013	1.1818	1.4469	1.2227	0.931	1.1241	1.0044	0.692	1.5342	1.3024	0.6755	1.1805	0.8834	0.7272	1.4175	0.48	1.3753
glycylleucine	92843	869-19-2	C02155	HMDB0000759	1.475	0.9229	0.9259	0.8752	0.9238	0.8622	0.7367	0.7708	0.9015	1.2037	0.9552	0.9831	1.0169	1.1665	1.451	1.3035	1.0647	0.9486	1.1941	1.1223	1.3606	0.7358	0.4875	1.5733	1.0489	0.6343	1.2035	1.0944	0.4913	1.9134	0.7015	1.0458
glycylvaline	2724807	1963-21-9		HMDB0028854	1.7842	1.0106	0.9893	1.2522	1.2539	0.8777	0.8708	0.8866	0.88	1.2163	1.0415	1.1655	0.8632	0.967	1.223	0.8177	0.9894	0.902	1.0405	0.9873	1.1893	1.0309	0.5237	1.1327	0.958	0.8219	1.1	1.2962	0.5372	1.3686	0.4953	1.045
guanidinoacetate	763	352-97-6	C00581	HMDB0000128	0.7917	0.6262	0.5526	1.583	1.4614	1.1252	1.3354	0.7403	0.8949	1.1593	1.3799	1.2707	0.7922	0.8137	0.9585	0.9279	0.9748	1.062	0.8556	0.9483	1.0844	1.1953	0.941	1.0068	1.0059	1.0528	0.9941	1.5681	1.0469	0.9143	0.5727	1.1942
guanidinosuccinate	439918	6133-30-8	C03139	HMDB0003157	1.3855	0.5637	1.9087	2.3945	1.4303	2.3795	1.7154	2.233	2.5682	1.2665	1.2891	1.5058	1.7833	2.0427	1.0035	0.394	0.3844	0.7747	0.6081	0.4153	0.9693	0.262	0.8875	0.6721	1.1773	0.9965	1.0381	0.0892	0.2408	0.7314	0.5565	0.7092
guanine	135398634	73-40-5	C00242	HMDB0000132	1.2209	0.86	1.3007	1.3703	1.5873	0.9316	1.4413	1.2609	0.8771	1.4644	1.4888	1.2532	0.9965	0.8982	0.8123	0.6776	1.0413	0.7578	1.0148	0.8382	1.0154	0.9807	0.7535	1.0035	0.7175	1.3991	0.8986	1.2398	0.574	1.0601	0.6213	0.9106
guanosine	6802	118-00-3	C00387	HMDB0000133	1.3398	0.9791	1.6279	1.3613	2.0191	0.9544	1.9067	1.3367	1.0361	1.3556	1.5789	1.6242	1.2583	1.1271	0.9559	0.6221	1.0374	0.7931	0.9555	0.8426	0.9341	1.0566	0.9091	0.837	0.7682	1.0209	0.9756	1.3764	0.6981	0.9453	0.8367	0.9156
guanosine 5'-diphospho-fucose		15839-70-0			0.6575	0.9578	0.6003	1.3156	0.92	0.6716	0.9922	1.0457	1.2558	1.1198	1.0078	0.8372	1.2468	0.9545	0.9553	0.7503	1.2107	1.4455	1.0431	1.0663	0.8171	1.0875	0.8013	0.8717	1.2373	0.918	1.1834	1.3174	1.2268	0.8576	0.8279	1.2549
5'- GMP	6804	5550-12-09	C00144	HMDB0001397	0.4249	1.2514	0.7075	0.7992	0.6884	0.8559	0.8713	0.9477	1.0961	0.7997	0.9307	0.6982	0.8377	0.956	0.9098	1.044	1.3445	1.4285	1.0744	1.3727	0.9394	1.7083	1.6818	1.0456	1.4599	0.9268	1.4438	1.0733	1.1105	1.2293	0.9168	1.5617
gulonate*	152304	20246-53-1	C00800	HMDB0003290	0.8665	1.354	0.7946	0.5092	0.9468	0.6138	1.4504	0.8774	0.5792	0.8334	1.0247	0.8027	0.6411	0.6381	0.6445	1.2134	1.504	1.794	1.5199	1.6489	0.7115	1.4583	1.472	1.595	1.1556	1.3679	1.3712	0.9753	0.9311	1.6686	0.6368	1.5211
heneicosapentaenoate (21:5n3)	11998573	24257-10-1			1.0922	0.3222	0.4608	0.0812	0.545	0.3061	3.0893	6.5498	1.207	1.1816	0.2364	0.6609	0.0812	0.6968	1.9324	1.6966	0.3361	0.47	0.6461	1	0.8142	1.4708	1.2439	4.2452	0.7494	1.7289	0.7265	0.8958	2.053	4.0063	1.3292	3.1856
heptadecasphingosine (d17:1)	5283557	6918-48-5			1.1395	0.8843	1.1176	1.2052	1.0131	0.9553	1.0192	1.1315	1.0125	0.977	0.904	1.2239	1.3219	0.9875	0.9521	0.778	0.7069	0.8238	0.7521	1.2396	0.7681	1.1409	1.1147	0.6025	0.8965	2.5129	1.0535	1.2453	0.7206	0.6939	0.6329	1.4435
heptadecatrienoate (17:3)*	16061034		C16344		0.6809	0.6022	0.5487	0.5464	1.4766	0.5056	1.5244	2.1094	0.5362	0.7597	0.7457	1.0247	0.3867	0.3867	0.9753	1.1831	0.7306	0.8806	0.8306	1.0735	0.3867	1.6458	1.6711	1.5304	0.5877	1.5278	1.3903	1.5792	1.378	1.8613	0.538	3.6389
heptanoyl glycine	10932172	23783-23-5		HMDB0013010	0.3486	1.6068	0.3069	0.6099	1.0702	0.2588	0.8582	0.6748	0.4427	1.1038	0.886	0.2477	0.3492	0.4749	0.3862	0.9298	2.7576	1.9131	1.4082	2.034	1.1076	1.921	1.0935	1.6547	1.5044	1.9082	1.5514	0.4743	0.6731	1.5727	0.7473	2.5228
hexadecadienoate (16:2n6)	13932172	28290-73-5		HMDB0000477	0.6106	0.7457	0.4941	1.028	1.5015	0.8906	1.7933	2.6109	0.5729	0.7259	0.7903	1.2709	0.4308	0.7039	0.9707	1.1451	0.7753	0.902	0.6684	1.0286	0.972	1.6599	1.2078	1.5425	0.8771	1.2324	1.3999	1.0828	1.4771	1.5829	0.6551	2.0724
hexadecanedioate (C16)	10459	505-54-4	C19615	HMDB0000672	1.5912	1.0985	0.7569	2.9993	2.1792	1.0276	3.528	1.706	1.5295	1.6218	1.5641	0.896	1.0082	1.396	1.0385	0.4311	1.3087	0.9141	0.9918	0.9882	1.0426	0.9694	0.6576	0.6359	0.9489	0.8781	1.4778	0.8197	0.6376	0.9263	0.6415	0.987
hexadecatrienoate (16:3n3)	91820460	7561-64-0			0.6315	1.0157	0.6941	1.6655	2.0028	1.2336	1.8665	1.6734	0.6878	0.8869	1.1367	2.2026	0.7284	0.8062	1.0949	0.5376	0.7742	0.8948	0.5321	0.7815	1.1133	1.8285	0.9459	0.995	1.005	1.2728	1.9215	1.8754	0.9525	0.932	0.6139	2.0543
hexadecenedioate (C16:1-DC)*					1.3522	0.9012	0.7299	2.2319	2.1743	1.072	2.5353	1.1122	1.3059	2.2166	1.5011	0.6071	0.9622	1.2009	1.0154	0.3974	1.0649	0.6375	0.9905	0.8886	1.2512	1.0095	0.8352	0.7392	0.6334	0.5112	1.4738	0.7033	0.6571	0.7994	0.5488	1.0248
hexanoyl CoA	449118;3246937		C05270	HMDB0002845	0.378	0.378	1.2855	0.951	1.2691	0.378	4.1681	0.9484	1	0.8179	1.601	0.5165	0.378	1.7303	0.378	1.1051	0.7687	0.3847	1.1278	0.9062	0.378	0.6076	1.4417	0.7251	2.3433	0.378	0.6963	1.8635	0.378	0.5491	1.1552	1.101
hexanoylcarnitine (C6)	6426853	6920-35-0		HMDB0000756	0.986	0.5916	1.0761	0.6831	0.9169	0.4056	1.7809	1.2	1.0342	0.7823	0.9768	0.2726	0.4671	1.4371	0.8928	1.2699	1.0516	1.0722	1.4322	1.2299	0.5544	0.5042	1.0986	1.2629	1.8362	0.3379	0.4031	0.6785	0.6402	1.4816	1.4924	1.014
hexanoylglycine (C6)	99463	24003-67-6		HMDB0000701	0.8884	1.6738	0.9008	0.9937	0.7047	0.1177	1.0577	0.6311	0.5484	0.8145	0.9801	0.13	0.3898	0.7729	0.5768	1.0911	1.7799	1.5701	2.7062	1.566	0.7411	2.0653	1.7845	1.421	1.866	1.0063	1.5565	0.7099	0.6694	1.3823	2.0884	1.595
hippurate	464	495-69-2	C01586	HMDB0000714	0.4821	0.8809	1.1713	1.2717	1.555	0.8078	0.79	1.3897	2.048	0.7407	2.4808	1.0103	0.385	0.3462	0.5428	0.7227	2.3566	0.9402	1.0005	2.0989	0.4886	0.98	3.1612	1.7632	0.2489	1.3802	0.9995	1.6912	0.9651	1.816	0.6142	4.302
histidine	6274	5934-29-2	C00135	HMDB0000177	1.064	0.8979	1.0857	1.0625	1.4076	0.9293	0.8942	1.0351	0.9721	1.2041	1.1035	0.9414	0.6693	0.8219	0.942	0.7343	0.9926	1.19	1.1767	1.0072	1.0757	1.1137	0.8536	1.0197	0.9928	0.8908	1.1925	0.9026	0.9209	1.0623	0.7926	1.0542
histidine betaine (hercynine)*	3083620	534-30-5			0.7294	1.3361	0.5982	0.761	0.8335	0.984	1.2303	1.3701	1.109	0.4851	0.5878	0.982	0.7816	0.7847	0.8876	0.9783	1.5339	1.3481	1.1157	1.6654	0.925	1.016	1.0915	1.9119	0.9839	1.2365	1.0386	0.465	0.8484	1.3324	1.1924	1.7122
histidine methyl ester	92893	1499-46-3			1.1077	1.2818	1.0031	0.953	1.0338	0.8849	0.8435	1.0368	0.961	1.0322	1.0647	0.7238	0.7347	0.9721	0.9149	0.6228	1.0861	1.0848	1.1583	0.9969	1.0194	0.9301	0.8801	1.1063	1.0912	0.727	1.0633	0.8058	0.8181	1.2449	0.652	1.1268
homocitrulline	65072	1190-49-4	C02427	HMDB0000679	1.5013	0.7457	1.7004	2.0334	1.0177	1.6704	2.6375	0.9896	1.4124	1.347	0.9784	2.1373	1.7099	0.8956	0.5467	0.3662	0.7885	0.987	0.7232	1.3438	0.965	1.2408	0.7802	0.9495	0.7455	1.0682	0.629	1.4819	0.6363	1.0996	0.6127	1.0104
homogentisate	780	306-08-1;451-13-8	C00544	HMDB0000130	0.7431	0.9508	0.8237	1.169	1.1277	1.4227	0.7017	1.1944	0.7604	0.8371	0.9722	0.7297	0.8257	0.8648	1.5371	1.2523	1.0043	1.923	2.0924	1.3393	2.1667	0.4884	0.7958	2.0387	1.0204	0.7689	1.3871	0.9957	0.75	2.2832	0.6035	1.0508
homostachydrine*	441447	1195-94-4	C08283	HMDB0033433	1.1014	0.7007	0.5644	0.3959	0.8137	0.4227	0.8621	1.2613	0.5454	1.1441	1.298	0.4256	0.2582	0.7673	4.6953	0.7825	0.8971	1.6176	1.8593	1.5198	1.5347	0.8592	1.1993	2.2112	0.8986	0.4289	1.4953	2.5038	1.4011	2.1923	1.3773	0.6553
hydroxy-N6,N6,N6-trimethyllysine*					1.3718	0.9038	1.0973	1.8337	1.1571	0.7344	1.1594	1.3012	0.8701	0.7791	1.4818	0.735	1.0625	0.6827	0.6831	0.6772	0.9502	0.8339	1.0976	1.3086	1	0.4569	1.1253	0.936	0.8114	1.1267	1.4434	0.8843	0.4569	1.0416	0.5633	1.5746
hydroxypalmitoyl sphingomyelin (d18:1/16:0(OH))					0.9054	0.8473	1.1848	1.4518	1.1335	0.6789	0.6789	1.5291	2.2498	1.2983	1.2219	0.919	0.9228	1.0168	1.2835	1.0916	0.823	1.2513	0.7718	0.6789	0.9564	0.9832	0.7153	0.7642	0.9158	1.11	0.9139	1.5385	1.0818	0.9162	1.0807	0.6922
hypotaurine	107812	300-84-5	C00519	HMDB0000965	1.2521	0.997	0.8711	0.6896	1.5584	0.5146	1.0487	1.2461	0.8585	1.7309	1.7231	0.8579	0.8987	0.9047	2.025	0.6509	0.8299	0.8934	0.8396	1.3741	1.003	0.795	1.1187	0.6794	1.032	1.8239	1.056	1.2264	0.7788	0.7168	1.0438	1.2816
hypoxanthine	790;135398638	68-94-0	C00262	HMDB0000157	1.6873	1.0629	1.092	1.2321	1.8144	0.8277	1.1753	1.1019	1.0651	1.329	1.4527	1.1917	1.0168	1.0096	0.9904	0.6054	1.0614	0.894	0.9891	0.8352	0.9147	0.9847	0.486	0.8543	0.8617	0.8838	0.9818	1.3296	0.6281	1.0707	0.6327	0.8874
imidazole lactate	793	14403-45-3	C05568	HMDB0002320	0.3029	2.2451	0.5424	0.1971	0.2251	0.3095	0.2655	0.2114	0.3908	0.2111	0.2067	0.1974	0.3215	0.2562	0.2729	1.2688	1.495	1.9614	1.5694	1.3724	1.5477	1.3129	2.1603	1.0835	1.1586	1.4412	1.8008	0.2949	1.1082	1.0067	0.9933	1.7554
imidazole propionate	70630	1074-59-5		HMDB0002271	1.4927	0.6574	1.2195	5.0213	0.8191	1.4095	2.54	0.7197	3.3989	0.7776	0.9869	0.733	3.109	2.7826	1.174	0.5754	0.8624	1.0067	0.5371	1.2523	1.2801	0.4441	1.1135	0.9933	0.7925	0.6686	1.1006	0.7922	2.1726	0.8428	0.3296	1.4015
indole-3-carboxylate	69867	771-50-6	C19837	HMDB0003320	0.7976	1.0166	1.234	1.918	0.6525	0.9834	0.7447	1.2372	1.3334	0.8029	0.7995	0.8346	0.8412	0.6539	0.5479	0.7665	1.4413	0.9214	1.4126	1.2338	1.216	1.4343	1.6513	1.2737	0.6127	1.1391	2.2466	1.0777	0.9454	0.837	0.832	1.8027
indoleacetate	802	6505-45-9	C00954	HMDB0000197	1.0397	0.5301	0.9147	0.6259	1.7465	0.5583	0.6084	0.5753	0.5806	1.0609	1.1147	1.1811	1.2833	0.5327	1.1134	0.5301	0.5301	0.5301	0.5626	0.5301	0.5301	0.5301	0.5301	1.0065	0.5301	1.1689	0.5301	1.4224	0.5301	0.9935	0.5301	0.5301
indoleacetylglycine	446640				0.5777	1.2669	1.4883	0.3498	1.0396	0.3103	0.4321	0.6318	1.0465	0.5612	0.9209	0.5423	0.7217	0.3443	0.6371	1.0083	1.9348	1.6099	1.9455	1.5105	0.8683	0.517	1.8135	1.8792	1.2341	1.331	0.9917	0.9577	1.4058	1.5147	0.8601	3.8467
indolelactate	92904	832-97-3	C02043	HMDB0000671	1.2646	0.9231	1.0077	0.6231	1.4378	0.7554	1.1422	0.9195	1.225	1.3618	0.9725	0.9222	1.1381	0.7611	1.1452	0.8476	1.1247	0.9041	1.1684	0.9431	0.4722	0.6735	1.1255	1.0932	1.1549	1.075	0.8353	1.1	0.5951	0.9923	0.5115	1.2963
indolepropionate	3744	830-96-6		HMDB0002302	0.771	0.5053	0.8814	1.0899	1.3189	0.7676	1.056	0.8766	1.7831	1.5342	1.2341	0.8341	0.9585	0.5992	1.6234	1.1753	1.9297	1.3213	1.1655	0.5961	0.9579	0.9723	1.4222	1.2234	0.3956	1.0277	0.6997	1.2155	0.6339	0.8132	0.594	1.0287
indoxyl glucuronide	2733785	35804-66-1		HMDB0010319	0.1769	1.943	0.4007	0.7621	0.6126	0.6113	0.5305	0.5159	0.4418	0.1769	0.4856	0.2399	0.1769	0.1769	0.1769	0.5973	2.0606	1.4886	1.8102	3.6444	1.4137	1.0271	4.3532	1.3665	0.5123	1.4565	1.3499	0.1769	1	1.3699	0.4273	2.2261
inosine	6021	58-63-9	C00294	HMDB0000195	1.3163	0.9579	1.2214	1.2284	1.2672	0.9521	1.338	1.0717	1.0085	1.032	1.2457	1.1961	1.0673	0.9894	1.0024	0.6873	1.0614	0.8871	0.9976	0.9133	1.0312	1.0354	0.7445	0.8601	0.8684	0.8785	0.9862	1.0568	0.6667	0.901	0.7451	0.9744
inosine 5'-monophosphate (IMP)	8582	4691-65-0	C00130	HMDB0000175	0.3869	1.3597	0.6643	0.7991	0.4557	0.632	0.8211	0.8448	0.6929	0.6728	0.7666	0.5186	0.7458	1.0024	0.8883	1.2644	1.3061	1.6198	1.0826	1.4115	1.2281	2.4168	2.3444	0.9976	1.6581	0.6122	1.9528	0.7172	1.0342	1.1285	1.273	1.6726
inositol 1-phosphate (I1P)	440194	573-35-3;106032-59-1	C01177	HMDB0000213	1.1553	0.6302	0.5747	1.0444	1.6485	0.8368	1.3898	1.2368	0.7794	1.6279	0.9588	1.3799	0.5923	0.4837	0.6761	1.3039	1.1665	0.9946	1.1777	1.188	0.8404	1.0054	0.7681	1.3974	0.789	2.0111	1.7687	1.5236	0.8003	0.8124	0.6256	0.9128
isobutyrylcarnitine (C4)	168379	25518-49-4		HMDB0000736	0.6296	1.0797	1.6283	0.2068	0.4112	0.3825	1.3723	0.6503	1.3854	1.06	1.2429	0.2068	1.4562	1.3656	0.9301	0.94	0.702	0.8067	0.5574	2.0621	0.4111	0.2068	3.3385	1.7477	0.8349	3.664	0.6135	0.5261	1.2493	0.6004	1.2906	1.1711
isocaproylglycine	28777652				0.6337	1.2627	0.4822	1.1865	1.0555	0.2288	1.022	0.5666	0.447	1.3902	0.9962	0.2253	1.0038	0.4563	0.5531	1.0112	1.7665	0.8875	0.7888	2.206	1.3864	1.8192	1.5702	2.1154	0.9937	1.3882	1.7075	0.5764	0.81	0.831	0.8841	1.3917
isoleucine	6306	73-32-5	C16424,C00407,C06418	HMDB0000172	1.1307	0.9993	1.0672	1.2736	1.0937	0.9265	1.0076	1.1689	1.0007	1.0172	1.038	0.9928	0.8964	0.897	0.9749	0.8924	0.9883	1.0856	0.9781	0.9965	1.0393	1.3558	0.9378	0.8832	0.9629	0.836	1.484	1.0755	1.0079	0.9784	0.7281	1.3266
isoleucylglycine	342532	868-28-0		HMDB0028907	1.1881	1.0029	0.9971	0.7433	0.6052	1.0276	0.6739	0.746	0.9552	1.0771	0.9303	0.8922	1.2371	1.0982	1.4008	1.8005	0.9637	0.9487	1.2901	1.1428	1.4372	0.6392	0.678	1.5738	1.0097	0.7015	1.3077	0.9091	0.4803	1.5452	0.837	1.0604
isovalerylglycine	546304	16284-60-9		HMDB00678	2.0132	0.9825	1.3115	0.4948	1.8925	0.2304	0.5848	0.687	0.6348	1.8639	1.1129	0.4622	1.2445	0.745	1.0512	0.6762	0.9291	1.2525	1.0206	1.0284	0.5359	0.9069	0.9884	1.3158	0.8356	1.3098	1.2132	1.0116	0.7677	1.1357	0.885	2.1228
itaconate	811	97-65-4	C00490	HMDB0002092	1.2865	0.4446	1.2488	1.3062	0.9471	0.795	1.7969	0.8293	1.0529	1.7353	1.222	5.2221	1.8878	2.2969	4.0969	6.8001	0.8186	0.6593	0.4986	0.4538	2.3623	1.5649	0.7044	0.5909	1.9164	0.3343	0.5648	5.0787	0.8339	0.6159	0.656	0.4397
kojibiose	164939	2140-29-6	G00404,C19632	HMDB0011742	1.4227	1.4567	1.2456	0.9183	0.2975	0.8555	0.9903	0.9356	0.992	0.4168	0.8339	1.0554	0.8144	0.8543	1.2649	1.008	1.3079	1.332	1.3583	0.9406	1.2238	1.0667	0.4859	1.3803	1.2022	0.8257	1.0991	0.8615	1.0236	1.5947	0.9019	0.9241
kynurenate	3845	492-27-3	C01717	HMDB0000715	0.9965	1.7172	0.655	0.5717	1.1477	0.6275	0.6932	0.8837	0.6916	0.879	1.3199	0.9592	1.0035	0.4647	0.655	1.0523	1.5203	0.8056	1.567	1.3858	0.4695	1.123	2.2738	1.3048	0.7253	1.6011	1.3198	1.5373	0.604	1.1498	0.4317	1.9602
kynurenine	161166	2922-83-0	C00328	HMDB0000684	1.4411	1.1389	0.4254	0.6819	1.7911	0.3765	0.6477	1.2415	0.5512	1.7247	1.6936	0.6075	0.593	0.234	0.5674	0.6684	1.3498	1.4397	0.9727	1.0273	0.6264	1.2292	0.8937	1.5905	0.7866	1.9159	1.8353	1.4311	0.3876	1.2785	0.426	2.3688
L-urobilin	5280818	34217-90-8	C05793	HMDB0004159	1.1575	1.3698	0.2699	0.4644	0.2587	1.1521	1.1213	8.1177	2.3692	0.1291	1	0.6392	0.5938	1.2498	0.2061	0.4709	1.5418	1.9967	0.7659	1.402	0.1291	1.6952	0.1291	1.2662	1.8251	1.761	0.3279	0.1291	0.2185	0.5047	0.7175	0.7617
lactate	612	79-33-4	C00186	HMDB0000190	1.2487	1.0543	1.2389	0.7247	0.7261	0.9024	0.9798	0.8465	0.9947	1.0231	0.935	0.8956	0.9728	1.0053	1.2071	1.1083	1.2048	1.1277	1.2317	0.9778	1.0086	0.8779	1.0578	1.0944	1.0359	0.9326	1.2658	0.9766	0.8377	1.0848	0.9126	0.9946
lanthionine	98504	3183-08-02			1.4169	0.9207	1.0393	1.2298	2.2948	0.5912	0.8342	1.0768	0.7904	1.1375	1.7502	1.1203	0.272	0.272	1.0827	0.272	0.9607	0.5893	0.272	0.7914	0.4613	0.2973	0.272	1.2199	0.272	1.1797	0.5313	1.0822	0.5769	0.9352	0.272	1.1765
laurylcarnitine (C12)	168381	25518-54-1		HMDB000225	0.7693	1.0019	0.4732	1.4421	1.4924	0.7962	0.9981	1.9297	0.4732	1.1133	0.7248	0.7587	0.6873	1.0432	0.7157	0.7373	0.7512	1.2885	0.5795	0.7478	1.1609	1.0455	1.5414	0.793	1.258	0.4758	0.4732	0.9026	1.1289	1.0316	1.1124	1.2645
leucine	6106	61-90-5	C00123	HMDB0000687	1.2181	1.0203	0.9837	1.1059	1.1059	0.9126	0.9467	1.0526	0.9536	1.008	1.0181	0.9408	0.8396	0.9075	0.9902	0.8541	0.992	1.0729	1.0115	1.0876	1.0426	1.1744	0.8571	0.938	0.976	0.9471	1.2499	1.0295	0.8574	1.1263	0.6829	1.1774
leucylglutamine*	4305457			HMDB0028927	0.8829	1.1595	0.8683	0.7974	0.603	1.0413	0.7681	0.9904	1.0374	0.9376	1.3579	0.6178	0.8626	1.2153	1.4069	1.6724	1.4575	1.1706	1.458	1.2657	1.183	0.7128	0.7629	2.462	1.1173	0.6275	0.9479	0.7568	0.5413	1.6625	0.8022	1.0096
lignoceroyl sphingomyelin (d18:1/24:0)		60037-60-7			1.0551	0.9794	0.7642	0.7664	0.9441	0.7451	1.1076	1.3723	1.2218	1.0372	0.813	0.8014	0.7894	0.8847	1.2916	0.8358	1.3357	1.0698	0.7463	1.0013	0.9047	1.062	0.9987	1.3547	1.1582	1.3107	1.0586	0.7185	1.0698	0.922	0.93	1.1721
lignoceroylcarnitine (C24)*					0.2664	1.888	0.2664	0.2664	0.2664	0.2664	0.2664	0.5632	0.2664	0.2664	0.2664	0.3244	0.2664	0.2664	0.2664	0.4411	1.6856	2.3289	0.6458	1.1697	1.5889	0.9707	1.7524	0.8433	0.6388	3.1755	0.7218	0.2664	1.7172	1.1262	0.2664	1
linoleate (18:2n6)	5280450	60-33-3	C01595	HMDB0000673,HMDB0006270	1.0494	0.5555	0.6502	0.1677	0.82	0.4993	2.0387	2.7556	0.807	1.0193	0.3831	1.181	0.0761	0.9364	1.6549	1.5247	0.5833	0.631	0.7571	0.9807	0.8605	1.3521	1.4972	1.7696	0.7936	1.2944	0.9268	1.1988	1.611	1.827	1.2095	2.2019
linolenate (18:3n3 or 3n6)	5280933;5280934		C06426,C06427	HMDB0001388,HMDB0003073	0.9586	0.5435	0.5257	0.2962	1.0465	0.5694	3.7006	6.9845	0.7146	0.9297	0.4417	1.7394	0.1542	0.9366	2.473	1.7229	0.4836	0.6147	0.5426	0.86	0.7504	1.6576	2.5953	2.5502	0.6836	1.5258	1.0414	1.6682	2.0369	2.8702	1.1751	5.4263
linoleoyl ethanolamide	5283446	68171-52-8		HMDB0012252	1.184	0.5269	0.5846	0.1427	0.4806	0.3551	1.6361	4.2824	0.6229	0.8237	0.2306	0.9734	0.0928	0.8134	2.2478	1.5812	0.4698	0.8488	0.953	1.2552	0.7382	1.7952	1.9202	3.2433	1.0266	1.5571	0.5615	1.603	2.515	2.9544	1.3934	3.1467
linoleoyl-arachidonoyl-glycerol (18:2/20:4) [1]*	9543796			HMDB0007257	0.9239	0.9316	0.5033	1.1105	1.6301	0.6478	1.3345	1.6017	0.7704	0.9939	1.3713	1.2653	0.9134	0.9601	0.9424	0.7101	1.3898	1.4206	0.6427	1.2845	0.8487	1.1333	0.5569	1.1981	1.0061	1.2924	0.8613	0.9312	1.0605	1.2699	0.6997	1.2503
linoleoyl-arachidonoyl-glycerol (18:2/20:4) [2]*	9543796			HMDB0007257	0.8315	0.7849	0.6088	0.9986	1.2127	1.0014	1.2757	1.2038	0.9578	1.0259	1.1161	0.8969	0.7375	0.929	1.0093	1.0761	1.3664	1.138	0.8343	1.3027	0.8409	1.1389	0.8116	1.429	1.0159	1.3333	0.7845	0.8494	0.7333	1.0535	0.619	0.9879
linoleoyl-docosahexaenoyl-glycerol (18:2/22:6) [2]*	9543899			HMDB0007266	0.7046	0.7283	0.6803	1.5856	1.2231	1.4471	1.6987	1.2936	1.1113	1.1966	1.4407	1.5628	0.9365	1.0711	0.8983	0.8824	0.9833	0.9615	0.4578	1.1627	1.2462	1.5887	0.695	0.9349	0.7894	0.9307	1.0167	0.6566	1.1403	0.8017	0.4235	1.0268
linoleoyl-linolenoyl-glycerol (18:2/18:3) [1]*	14275409			HMDB0007249	0.3898	0.8642	0.3954	2.0024	1.3673	2.0286	2.1178	1.936	0.7277	0.5704	1.521	1.7356	1.1679	1.0957	0.9064	0.2947	0.5958	1.0631	0.3076	1.2015	1.0721	1.6387	0.7157	0.7044	0.8859	0.8407	1.1841	0.9369	1.4314	0.7336	0.4624	2.0148
linoleoyl-linolenoyl-glycerol (18:2/18:3) [2]*	9543737			HMDB0007250	0.655	0.8729	0.6399	1.5194	1.1656	2.2364	1.6151	1.8395	1.0192	0.6023	1.0613	1.7972	1.2309	1.3344	1.0631	0.6308	0.9463	1.0967	0.3574	0.8401	1.3826	1.5004	0.8312	0.7253	0.765	0.7448	1.1549	0.8049	0.9808	0.7461	0.448	1.3275
linoleoyl-linoleoyl-glycerol (18:2/18:2) [1]*	9543729			HMDB0007248	0.6248	0.6161	0.4769	1.6832	1.6711	1.3022	1.6676	1.925	0.8168	0.7808	1.2442	1.1717	0.9364	1.033	0.871	0.5222	0.9654	1.0414	0.4047	1.0555	1.022	1.5342	0.502	0.7341	0.8278	1.0967	1.0512	0.7119	1.1344	0.978	0.4667	1.268
linoleoyl-linoleoyl-glycerol (18:2/18:2) [2]*	9543729			HMDB0007248	0.6614	0.6512	0.5842	1.9839	1.0149	1.5429	1.8632	1.669	1.1167	0.8928	0.9147	1.371	1.0881	1.5666	0.8729	0.6623	1.2025	0.9973	0.5417	1.0027	1.5221	1.7523	0.7681	1.0857	0.8147	0.844	0.7804	0.4459	0.9914	1.1153	0.4237	1.5396
linoleoylcarnitine (C18:2)*	6450015	36816-10-1		HMDB0006469	0.9069	1.2402	0.7651	0.8795	1.6388	0.9947	1.0051	1.1783	0.9243	1.0381	1.0049	0.8894	0.9504	0.9473	1.5663	0.6239	1.2008	1.9905	1.3549	0.9951	1.4131	0.8022	1.0165	1.222	1.3087	1.2748	0.7917	0.571	0.9214	1.7205	0.5234	0.738
linoleoylcholine*	53481656			HMDB0013213	0.4086	0.6762	0.2195	1.7625	2.5962	0.6862	1.3341	1.1308	0.1533	0.9766	0.9632	2.9511	0.2428	0.6552	0.8645	0.4117	1.8943	0.5159	0.7341	1.4484	1.5094	4.043	0.7449	1.1916	1.0234	0.392	1.623	1.7331	1.5075	1.3579	0.226	1.5365
lysine	5962	56-87-1	C00047,C00739	HMDB0003405	1.3111	0.9828	1.3676	0.9898	1.1355	0.7927	0.9887	1.1072	1.0937	1.014	1.1405	1.0231	0.748	0.7822	0.9321	0.7504	0.9716	1.0306	1.1035	0.9954	0.8361	1.0115	0.7517	1.0967	0.8545	0.9839	1.1363	1.0046	0.7407	1.0827	0.6323	1.0867
lyxonate					1.1816	2.1014	0.7938	1.3583	1.252	1.6234	0.6801	1.027	1.2681	0.6837	1.1322	0.9094	1.1376	0.8669	1.0788	0.7135	0.8212	1.1427	1.0143	0.6687	1.3534	0.7673	0.6466	0.8037	0.6602	1.106	1.4033	0.9857	0.8289	1.6913	0.665	0.6324
malate	525	6915-15-7	C00497,C00149,C00711	HMDB0000744,HMDB0031518,HMDB0000156	1.1494	0.9841	0.9476	1.0004	0.9355	1.2019	0.8281	0.9808	1.0439	0.9738	0.9625	1.0595	1.1451	1.0063	1.2222	0.9638	0.8741	0.9901	0.9996	1.054	1.1895	0.9151	0.8971	0.905	1.0708	1.005	1.216	1.0792	1.0169	1.0071	0.9545	0.8969
maleate	444266	110-16-7	C01384	HMDB0000176	1.1017	0.8783	0.654	0.764	0.9763	1.2665	0.5948	1.2823	1.1863	1.288	1.0648	0.9213	1.1776	1.025	1.6819	0.5424	0.8626	0.7701	0.8996	1.1398	1.2322	0.676	0.7692	1.1509	1.0016	0.9984	0.9864	1.028	1.063	1.3765	0.7847	0.9708
malonate	867	141-82-2;26522-22-85-0	C00383	HMDB0000691	1.0575	1.2611	0.9788	0.5527	1.3628	0.862	1.0596	1.2866	1.0853	1.3933	1.3175	0.7768	0.7532	0.8322	1.1404	0.6778	0.9668	1.333	0.9245	0.9121	0.9864	1.0136	1.0572	1.3671	0.7583	1.0572	0.7329	0.8144	0.8843	1.0359	1.2095	0.9408
malonylcarnitine	22833583	853728-01-5		HMDB0002095	0.6127	1.4765	0.5515	0.5503	0.6607	0.7253	0.7406	0.7143	0.7188	0.6773	0.7504	0.699	0.5821	0.8222	0.8325	1.0995	1.8626	2.0007	1.5444	2.317	1.3209	1.3763	1.4108	1.3414	1.5876	1.0346	1.3955	0.7075	0.9654	1.3872	1.1823	1.6469
maltopentaose	13489094	34620-76-3	C06218	HMDB0012254	0.2624	1.6388	1.9186	1.6985	0.1157	2.1428	0.2405	0.1157	0.9466	0.1157	0.1157	1.9763	2.2912	1.7645	1.7521	1.1395	0.1157	0.3926	0.6585	0.2329	1.5428	0.679	1.1971	0.4491	1	0.1157	0.5026	0.341	1.5941	0.3035	1.8709	0.5082
maltose	10991489	6363-53-7	C00208	HMDB0000163	1.6222	1.4765	1.3655	1.155	0.0652	1.0162	0.8136	0.7245	1.0939	0.2307	0.5037	1.3513	1.0369	0.9218	1.3004	0.8913	0.8316	1.0778	1.1085	0.8017	1.3487	1.0305	0.6166	0.9838	1.0854	0.4762	1.0636	0.8104	0.8845	1.1256	0.8291	0.848
maltotetraose	439639	34612-38-9	C02052	HMDB0001296	0.8166	1.8611	2.3185	2.3725	0.0477	2.3403	0.4481	0.1968	1.3504	0.0477	0.0477	2.6166	2.218	1.8143	1.7574	1.0704	0.2671	0.5129	0.7186	0.3636	2.0409	0.9296	1.2044	0.5426	1.2234	0.0673	0.8241	0.4437	1.2976	0.4656	1.5794	0.6252
maltotriose	439586	1109-28-0	C01835	HMDB0001262	1.3224	1.7644	1.886	1.7861	0.0052	1.594	0.6839	0.4251	1.3194	0.0535	0.1666	1.93	1.6388	1.3916	1.54	0.98	0.5306	0.757	0.9566	0.6085	1.6168	1.0565	0.9757	0.719	1.1859	0.1796	1.02	0.6398	1.0876	0.7468	1.2084	0.7807
mannitol/sorbitol	6251;5780		C00392,C00794	HMDB0000247,HMDB0000765	1.6587	1.1542	1.9993	1.941	0.3384	1.3192	1.2933	0.6448	1.2347	0.4359	0.6157	2.2727	1.4458	1.4951	1.7666	0.8702	1.0074	0.8525	0.9926	0.7309	1.5134	1.0705	0.8998	0.8434	1.6345	0.3114	1.2049	0.7488	0.8778	0.837	0.949	0.8018
mannonate*	3246006	642-99-9			1.3764	0.7371	1.2431	1	1.2304	1.1768	1.6148	0.9492	1.4805	0.9595	1.0926	1.3842	1.6906	1.0648	1.1613	0.8149	0.0625	0.0625	0.6913	0.6269	0.0625	1.289	0.8754	0.0625	0.0625	0.6232	0.6717	1.6839	0.6092	0.0625	0.548	0.673
mannose	185698;82308;18950;439680	3458-28-4	C00159,C02209,C00936	HMDB0000169	1.0639	1.5051	1.2789	1.6816	0.2495	1.0436	0.7319	0.5511	1.0157	0.2582	0.4849	1.3698	1.2907	1.2473	1.2143	0.8464	0.5783	0.9234	0.9843	0.5586	1.3286	1.0708	0.9425	0.6346	1.1144	0.39	1.088	0.7461	1.1828	0.7719	1.1517	0.7118
margarate (17:0)	10465	506-12-7		HMDB0002259	1.1468	0.3893	0.6688	0.1299	0.418	0.3141	3.0017	5.9824	0.7953	1.0874	0.2664	0.82	0.1018	1.0768	3.0464	2.6479	0.4784	0.5453	0.9414	0.9378	0.7429	1.1805	2.7441	3.9196	0.7908	1.6585	0.5259	1.0586	2.7051	3.2258	2.338	4.1508
margaroylcarnitine (C17)*	53477803	106182-29-0		HMDB0006210	0.8306	0.7179	0.5762	1.2882	1.2457	0.9285	2.0064	1.4821	0.827	1.3195	1.0756	1.1164	0.6012	1.188	1.1203	0.5873	1.0814	0.6949	0.5445	0.6092	0.9583	1.0928	1.3484	0.7328	1.0902	0.705	1.2151	1.0682	0.8098	1.0417	0.462	0.7525
mead acid (20:3n9)	5312531	20590-32-3		HMDB0010378	1.442	0.4175	0.9453	0.0629	0.6028	0.3598	2.0602	4.2893	1.0547	1.1255	0.2279	0.6691	0.0459	0.7446	2.1898	1.9402	0.3952	0.5453	1.3357	0.9199	0.4732	0.7154	2.0728	4.1956	0.8757	1.6267	0.4885	1.4249	1.9148	3.295	2.7918	2.817
mesaconate (methylfumarate)	638129	498-24-8	C01732	HMDB0000749	1.0792	0.4453	1.1093	0.7102	0.9492	0.4453	0.9791	0.6932	2.162	0.4453	0.7371	1.6986	0.8849	0.4453	1.6404	1.1197	1.4202	0.4453	0.4453	0.4453	0.4453	0.827	0.6499	1.2697	0.5337	0.4453	0.4453	2.0291	1.0941	0.8536	0.4453	1.0209
methionine	6137	63-68-3	C00073	HMDB0000696	1.407	1.025	1.0525	1.0535	1.3212	0.7998	1.0157	0.9506	0.9186	1.1337	1.1326	1.1626	0.866	0.9084	1.1527	0.7706	1.0186	1.0002	1.0829	0.9998	0.9641	0.9595	0.6795	0.9653	0.9001	0.9019	1.0042	1.1858	0.6768	1.1706	0.6275	0.959
methionine sulfone	69961	820-10-0		HMDB0062174	1.328	0.563	1.0738	0.563	0.9051	0.9644	1.0356	0.6316	1.2703	1.0454	0.563	0.8143	0.563	0.9618	1.7317	0.563	0.563	0.563	0.563	0.563	0.563	0.563	0.563	0.6361	0.563	0.563	0.563	1.0382	0.563	0.563	0.563	0.563
methionine sulfoxide	158980	3226-65-1	C02989	HMDB0002005	1.7955	0.8149	0.7732	0.8926	1.4502	0.7548	1.0539	1.377	0.8527	1.411	1.1733	1.1084	0.7559	0.9461	1.6911	0.8606	0.9346	0.9223	1.4261	1.1008	0.8998	0.9152	0.7023	1.4461	0.8879	1.3715	1.625	1.2403	0.5224	1.5242	0.6896	1.3212
methyl glucopyranoside (alpha + beta)	445238;3036743;2108			HMDB0029965	1.041	1.5204	0.9033	1.1898	0.3533	1.2243	0.8292	1.1706	0.8083	0.5019	0.7023	0.7374	0.8988	0.8938	1.1839	0.7227	1.0376	1.0629	1.1782	1.1558	1.3884	0.9624	0.7628	1.1312	1.0599	0.7016	0.8418	0.6563	1.1233	1.2779	0.826	1.0546
methylmalonate (MMA)	487	516-05-2	C02170	HMDB0000202	1.385	0.863	0.7911	0.4546	0.7119	1.0997	0.6346	0.6715	0.6581	1.1817	0.9251	1.1772	1.0605	1.0071	1.7352	1.1427	0.9939	0.8732	1.0078	1.0085	1.214	0.6127	0.6598	1.0189	1.2817	0.6843	1.228	1.0061	0.8185	1.1211	0.6642	0.8984
methylphosphate	13130	7023-27-0		HMDB61711	0.7561	2.2469	2.0597	1.1731	0.5521	1.2248	0.7575	0.8999	1.332	0.6173	0.8447	0.7348	1.3558	1.9263	2.1513	0.6934	0.7987	1.2495	0.9831	0.5674	1.0916	1.0581	1.6823	1.0169	1.123	0.4157	0.6908	0.4589	1.8275	0.8685	1.432	0.6342
methylsuccinate	10349	498-21-5		HMDB0001844	1.5905	0.6995	1.7267	1.9542	1.2632	1.0256	1.6289	0.8252	1.5571	0.9583	1.2557	1.5982	1.3566	0.8528	1.6395	0.9136	1.0439	0.7479	0.9193	0.7975	1.0001	0.9543	1.3682	0.9999	0.8622	0.399	0.9657	2.7014	1.1225	0.9754	0.7152	0.922
methylsuccinoylcarnitine					0.6557	0.9936	0.4498	0.7011	0.6563	0.9011	0.549	0.8134	0.9377	0.659	0.7783	0.7231	1.0064	0.6547	1.0453	1.1874	1.8608	1.5138	0.9224	1.2098	1.3974	1.1153	1.2591	0.7042	1.4505	1.4873	1.4089	2.5346	0.3845	1.4152	1.0067	1.2838
myo-inositol	892	87-89-8	C00137	HMDB0000211	1.0601	0.8882	0.9875	0.8904	1.2673	0.7554	1.0209	1.4231	1.1552	1.3024	1.3372	0.8241	0.8745	1.067	1.0223	0.7715	1.1223	1.136	1.0125	0.9526	0.8702	1.1462	0.9435	1.0499	1.0197	0.9094	0.8846	0.9789	0.9708	1.0864	0.7786	0.9574
myristate (14:0)	11005	544-63-8	C06424	HMDB0000806	1.3076	0.7141	0.7446	0.2821	0.9986	0.4577	2.3316	4.8199	0.8735	0.9454	0.4874	1.0315	0.1906	0.9335	2.396	2.2466	0.5206	0.8513	0.8975	1.0014	0.6365	1.1119	2.936	3.1006	0.8992	1.5173	0.8146	1.286	1.5724	3.0029	1.8873	3.9458
myristoleoylcarnitine (C14:1)*	129691961	889848-55-9		HMDB0240588	0.5384	1.1771	0.7246	1.8331	1.6745	1.0912	1.9931	1.6234	1.4103	1.4313	0.98	1.2906	0.4916	0.9909	0.7156	0.4916	0.7922	1.0091	0.4916	0.4916	0.8724	0.9756	1.5237	0.606	1.3662	0.4916	1.417	0.9398	1.3228	0.9708	0.5827	0.8455
myristoylcarnitine (C14)	6426854	18822-89-4		HMDB000506	0.5578	1.174	0.6014	1.1157	1.7373	1.0496	1.1399	2.2286	0.9352	1.3391	0.6243	0.6026	0.8375	1.1795	0.9302	0.6093	1.056	1.5708	0.9789	1.0211	1.0707	0.9334	1.3549	0.8449	1.5202	0.8907	0.9499	0.6584	1.0707	1.2744	0.9497	0.8261
N('1)-acetylspermidine	496	14278-49-0	C00612	HMDB0001276	1.4233	1.2258	1.5355	1.0008	1.2893	0.7551	0.9404	0.853	1.36	1.0822	1.3732	0.9992	1.0198	0.7306	0.9004	1.0373	1.1563	0.8506	0.9471	1.0181	0.8095	1.1629	0.9272	0.9544	0.9693	0.8065	1.0944	2.1162	0.8538	1.0267	0.8025	0.909
N,N,N-trimethyl-5-aminovalerate	14274897				1.1088	0.9543	1.1331	2.4045	1.7265	2.5608	1.3479	1.1913	1.2633	1.8369	1.9255	2.7908	1.3215	1.0624	0.8079	0.9045	0.8142	0.8441	0.9323	1.0457	0.5872	1.1032	0.9068	0.922	2.0415	0.9062	0.8366	0.9063	0.6363	0.917	0.692	0.8221
N,N,N-trimethyl-alanylproline betaine (TMAP)				HMDB0240365	1.1914	0.9904	1.0534	1.0416	1.1998	0.7904	1.0197	0.8103	1.3303	1.24	0.7476	0.7882	1.0979	0.8759	0.9249	0.0574	1.0096	1.1207	0.8586	0.9087	0.0574	1.1517	1.1322	0.8127	1.1359	1.2243	0.8975	1.3616	0.6352	0.8365	0.0574	0.1256
N,N-dimethylalanine	5488191	2812-31-9			1.1991	1.1137	1.0055	0.776	0.4188	0.8015	0.6686	1.1165	1.1646	0.607	0.5807	1.5167	1.9949	1.3857	1.9458	1.2537	0.7207	1.0342	0.8403	0.7248	1.7621	0.9637	0.9229	0.6421	1.3917	1.3199	0.5972	2.8414	1.5712	0.758	0.9945	0.6754
N-acetyl-1-methylhistidine*	53859791				0.5116	1.8532	0.4652	0.3863	0.486	0.4749	0.4935	0.5065	0.5367	0.5445	0.7386	0.5111	0.5141	0.6672	0.4976	1.1569	1.4273	1.6639	1.4432	1.612	1.2213	1.9293	0.7545	1.0004	1.6747	1.2265	1.6417	1.173	1.0276	1.0956	0.9996	1.4746
N-acetyl-2-aminooctanoate*	95555			HMDB0059745	0.0645	1.5483	0.0929	0.108	0.0935	0.2389	0.1482	0.0999	0.1908	0.1505	0.1453	0.0994	0.1531	0.1576	0.1631	1.4041	1.4681	1.8657	1.0152	0.9848	1.3551	1.7394	1.4492	1.1438	1.9033	1.0293	1.1761	0.372	1.6541	1.1331	1.2579	2.1868
N-acetyl-3-methylhistidine*	193270	37841-04-6			0.7919	1.2258	0.7764	0.6989	1.0586	0.5766	0.9978	0.9433	0.9921	1.1609	1.3106	0.8626	1.1068	0.966	1.0103	0.7282	1.0297	0.9884	1.1329	0.9293	0.9402	0.9495	0.0455	1.0022	1.525	1.2996	1.0474	1.4886	0.7546	1.1886	1.1122	1.3033
N-acetyl-glucosamine 1-phosphate	440364	31281-59-1	C04256	HMDB0001367	1.0565	0.9207	1.4176	1.0617	1.2507	0.8573	1.1729	0.9939	1.0029	1.1646	1.0968	0.9971	1.2823	0.8772	1.0517	0.5898	0.9772	1.0399	1.0544	0.7218	0.862	1.0219	0.7765	0.959	1.04	0.724	0.8366	0.8298	1.5674	1.0322	0.9147	0.8497
N-acetyl-isoputreanine	131802901				2.2176	0.8916	1.2145	1.0989	2.0727	0.997	1.0319	1.1738	1.4024	2.9729	2.8221	1.1047	1.2175	1.5639	1.3586	0.7561	0.7847	0.7676	0.6594	0.6962	0.6029	0.7506	0.5905	0.798	1.1552	0.86	1.003	2.6463	0.8688	0.9468	0.5858	0.9232
N-acetylalanine	88064	97-69-8	C02847	HMDB0000766	1.4889	1.1589	0.9053	1.0859	1.5483	0.6491	0.84	1.0468	0.8417	1.1107	1.0807	1.0556	0.8468	0.9125	1.132	0.7774	1.0044	0.976	1.0594	0.8705	1.051	0.9843	0.4875	0.8631	0.9956	0.7945	1.1238	1.2845	0.7608	1.3937	0.6748	1.0884
N-acetylarginine	67427	155-84-0	C02562	HMDB0004620	0.6916	1.9018	0.501	0.3398	0.5173	0.3999	0.5274	0.447	0.4375	0.576	0.511	0.4468	0.4117	0.4608	0.6575	1.2222	2.323	1.9336	3.3271	3.4543	1.2271	1.4594	2.1736	2.4139	2.1687	3.8499	1.6338	0.5655	1.0492	2.7294	0.9508	3.277
N-acetylasparagine	99715	4033-40-3		HMDB0006028	0.7778	0.9912	0.6783	0.9542	1.0096	0.8698	0.572	0.7765	0.7371	1.2244	0.9933	0.8953	0.8778	0.709	1.1009	0.8819	1.0963	1.3144	1.1132	1.1378	1.1525	1.0828	0.7902	1.0067	1.0731	1.5033	1.4185	0.7781	1.0825	1.1433	0.6458	1.0377
N-acetylaspartate (NAA)	65065	997-55-7;997-55-7	C01042	HMDB0000812	0.8083	0.7861	0.9791	1.1768	0.9492	0.9068	1.1104	0.9086	1.3429	0.9222	1.0543	1.0062	0.9938	1.0135	1.1333	1.0143	1.2283	1.0607	0.7803	0.7889	1.1609	2.3373	0.913	0.6689	1.3888	0.5884	1.5628	1.3478	1.0598	0.9892	0.5942	0.9365
N-acetylcitrulline	656979	33965-42-3	C15532,C02851	HMDB0000856	1.0558	1.4443	0.461	0.2543	1.4304	0.1622	0.521	0.3252	0.3935	1.8876	1.7561	0.2492	0.4335	0.64	0.7727	0.8132	3.0277	1.6772	2.69	4.1766	0.5657	1.0231	0.9769	2.8061	1.5877	3.3008	0.6227	1.2905	0.729	2.2383	0.7454	2.4979
N-acetylcysteine	12035	616-91-1	C06809	HMDB0001890	0.6678	1.0701	0.7375	0.7725	1.4051	0.9202	0.8248	0.9645	0.9215	1.003	1.3612	0.997	0.7864	0.6592	0.8601	0.7815	1.3923	1.1037	1.0486	1.0986	0.9795	1.0058	1.451	1.2996	1.1155	1.1897	1.1121	0.8923	0.9073	1.2518	0.696	1.5
N-acetylglucosamine 6-phosphate	439219	102029-88-9	C00357	HMDB0002817	1.2652	0.8093	0.9487	1.1286	2.1465	0.9723	1.3264	1.1902	1.1544	1.5733	1.2546	1.2231	1.1343	0.9801	0.9675	0.7539	1.0833	1.0938	0.8338	0.8673	0.8801	1.0541	0.6337	0.787	0.9995	1.3337	1.0005	1.4081	0.8878	0.9004	0.7417	0.9804
N-acetylglucosamine/N-acetylgalactosamine	84265;439174		C01074	HMDB0000212,HMDB0000215	1.1773	1.1785	1.0611	1.0223	1.5186	0.7655	0.8107	0.9748	0.9016	1.1234	1.3	1.2047	0.7813	0.5868	0.921	0.5654	1.041	0.9971	1.1395	0.8243	1.0879	1.0029	0.5645	0.8539	0.7992	1.1124	1.1534	1.53	0.7021	1.0832	0.6169	0.7778
N-acetylglucosaminylasparagine	123826	2776-93-4	C04540	HMDB0000489	1.3949	0.5963	1.5237	1.6355	1.9702	1.4917	1.5745	1.7509	1.8895	1.4353	1.8977	1.2349	1.3065	1.802	1.6218	0.4795	0.669	0.7344	0.6323	0.5652	0.6845	0.6849	0.6906	0.7852	1.041	0.4629	0.959	1.9125	0.6417	0.8422	0.6569	0.6335
N-acetylglutamate	70914	5817-08-03	C00624	HMDB0001138	1.4612	0.9017	0.8685	0.7065	1.1067	0.5778	0.8537	0.4478	0.5373	1.4599	1.1018	0.9981	1.0175	0.9971	1.3496	0.6022	1.1587	1.0777	1.2862	1.4411	0.5569	0.5656	0.9066	1.3368	1.3903	1.4789	0.7116	1.2816	0.633	1.6135	0.7818	1.0019
N-acetylglutamine	182230	2490-97-3	C02716	HMDB0006029	0.7247	1.2186	0.8471	0.6306	0.5581	0.7482	0.5088	0.6376	0.621	0.7467	0.6986	0.783	0.797	0.8302	0.9347	1.5693	1.415	1.3296	1.3554	1.3166	1.2553	1.2063	1.0739	1.1592	1.0744	1.1326	1.1912	0.7061	1.0367	1.0813	0.9633	1.1719
N-acetylglycine	10972	543-24-8		HMDB0000532	0.689	1.2683	0.6668	1.2314	0.638	0.4837	1.1792	0.9744	0.7585	0.9256	0.7083	1.0277	0.8228	0.8167	0.8634	1.0105	1.3086	1.9754	1.1043	1.0922	0.9895	1.8618	0.8527	1.0327	1.144	1.5106	1.7785	1.473	0.9753	0.897	0.7087	1.4971
N-acetylhistamine	69602	673-49-4	C05135	HMDB0013253	3.1278	0.3505	0.557	5.6041	2.0477	2.86	1.1347	0.5822	2.5561	0.3505	0.3505	0.66	2.53	1.2017	0.8034	0.3505	0.3505	0.4686	0.3505	0.3505	1.5578	0.3505	0.8653	0.4699	0.3505	0.3505	0.3505	0.3505	2.2632	0.7548	0.3505	0.5791
N-acetylhistidine	75619	39145-52-3	C02997	HMDB0032055	0.9145	1.0959	0.9508	0.6888	0.8286	0.6545	0.6708	0.5694	0.6942	1.0147	0.9555	0.9493	0.9003	0.9152	1.0349	0.9793	1.3714	1.4785	1.6921	1.3899	1.223	1.1639	1.0962	1.369	1.7394	1.248	1.1585	0.7654	0.9853	1.343	0.898	1.1788
N-acetylhomocitrulline					1.0931	1.3328	1.1358	0.7837	0.7992	0.8401	1.424	0.7272	0.7141	0.8064	1.0256	1.3815	1.1238	0.902	0.7498	0.6769	1.1053	1.1446	1.5007	1.6581	0.9593	0.9744	0.8723	1.252	1.1227	1.3527	0.7491	0.9136	0.7457	1.2499	0.6582	1.5083
N-acetylisoleucine	306109	3077-46-1		HMDB0061684	0.9147	1.0475	0.8464	0.7526	1.0384	0.557	0.4672	0.8612	0.741	1.0458	0.9663	0.5497	0.5237	0.5871	0.6739	1.0406	1.253	1.7263	1.2012	1.3839	1.0526	2.1114	1.3068	0.9993	1.0007	1.22	2.8146	0.7008	1.275	0.9583	0.4746	2.6852
N-acetylleucine	70912	1188-21-2	C02710	HMDB0011756	0.7474	1.2244	0.4929	0.3952	0.6021	0.4811	0.3781	0.6174	0.5228	1	0.8812	0.3919	0.4911	0.5602	0.774	1.7469	1.9956	2.2197	1.4978	2.0714	1	2.0793	2.1882	1.604	1.5222	1.6237	2.7326	0.6233	1.3439	1.3963	0.6623	2.7768
N-acetylmethionine	448580	65-82-7	C02712	HMDB0011745	0.975	1.1771	0.8219	0.7282	1.318	0.5538	0.9776	0.7266	0.7723	1.0992	1.1618	0.9824	0.8735	0.8432	1.0536	0.91	1.3315	1.0149	1.2855	1.1577	0.9124	1.0282	0.9851	1.1201	1.0491	0.9342	1.2431	1.4335	0.7368	1.3313	0.662	1.2173
N-acetylmethionine sulfoxide	11902949	108646-71-5			0.8878	0.9564	0.5406	0.5879	1.1273	0.4022	0.8685	0.9091	0.4963	1.0436	1.0887	0.7602	0.6182	0.6668	1.0572	1.1207	1.2613	0.8593	1.3548	1.3341	0.7804	1.0705	1.1273	1.8006	0.9471	1.2258	1.9452	1.3473	0.7455	1.5299	0.8834	1.6975
N-acetylneuraminate	439197	131-48-6	C00270	HMDB0000230	1.3112	0.9164	1.098	0.8265	1.5309	0.7696	1.4959	0.9751	0.9024	1.3694	1.4732	0.945	1.5441	0.9358	1.3871	0.7723	1.1098	1.0181	1.1023	0.8181	0.8159	0.7913	0.9072	1.1344	1.3633	0.786	0.9819	1.2041	1.1431	1.4193	0.7108	0.8618
N-acetylphenylalanine	74839	2018-61-3	C03519	HMDB0000512	0.5792	0.9607	0.4883	0.7926	1.0968	0.7346	0.3977	0.9834	0.8069	0.9534	1.3183	0.6303	0.6646	0.5882	1.0299	0.751	1.6202	1.5771	1.0166	0.9768	1.3144	1.5028	1.3027	1.257	1.684	1.2293	1.6531	0.8435	1.1593	1.3851	0.6342	1.7103
N-acetylputrescine	122356	18233-70-0	C02714	HMDB0002064	2.0946	0.8646	0.9566	0.8857	0.8841	0.7441	1.0802	0.9183	1.0174	1.0621	1.4571	0.916	1.211	1.008	1.1044	0.9472	0.9827	1.1485	0.9873	0.7417	0.7698	1.1099	0.992	1.088	1.2595	0.822	0.8313	2.2495	0.9016	1.1149	1.3389	1.0404
N-acetylpyrraline			C01227		1.1758	1.0597	0.4188	0.1925	1.6633	0.5131	0.6685	0.5345	0.5168	1.3081	1.3562	0.5965	0.4094	0.3985	0.6842	1.3027	3.2658	3.9342	3.0244	3.4411	0.9403	0.7818	0.6097	3.7804	1.4139	5.093	0.2248	0.9041	1.9356	3.4852	0.6235	1.4835
N-acetylserine	65249	97-14-3		HMDB0002931	0.8967	1.3114	0.6892	0.9098	0.9324	0.7296	0.6414	0.7823	0.6607	0.9525	0.8415	0.8402	0.759	0.7385	0.9585	1.1634	1.4207	1.7366	1.6354	1.5733	1.4434	1.4678	1.0415	1.2099	1.1977	1.7217	1.7811	0.8676	1.2966	1.5834	0.8613	1.6427
N-acetyltaurine	159864			HMDB0240253	0.8191	1.3269	0.8538	0.8749	1.7575	0.951	0.8506	1.339	1.1039	0.8506	2.1469	1.049	0.7213	0.4233	0.3339	0.6174	2.1575	1.9009	0.6675	1.1543	0.5813	1.5298	1.4665	1.7934	1.1247	1.431	0.7182	0.9493	0.8278	1.1747	0.8003	1.1421
N-acetylthreonine	152204	17093-74-2		HMDB0062557	1.5902	1.0044	0.935	1.2339	1.2985	0.6017	1.0531	0.9405	0.7534	1.0536	0.9617	1.006	0.9378	0.8144	1.0532	0.7178	1.1267	1.0469	1.2331	0.9884	0.9779	1.2084	0.7763	0.9956	0.9459	0.903	1.3535	1.1371	0.7268	1.2622	0.4746	1.4177
N-acetyltryptophan	439917;700653	1218-34-4	C03137	HMDB0013713	0.3721	1.0838	0.4317	0.5109	0.9162	0.4593	0.3887	0.6316	0.7338	0.6924	0.8939	0.3888	0.4429	0.2599	0.7066	2.5574	2.7472	1.3651	1.6033	1.6735	1.8675	2.11	3.6808	1.3434	1.8634	1.4148	1.926	0.6846	1.3191	1.2093	0.5761	2.658
N-acetyltyrosine	68310	537-55-3		HMDB0000866	0.7494	0.8305	0.6379	0.757	1.4578	0.8595	0.4588	1.0095	0.9942	1.0061	1.2862	0.8254	0.7048	0.6999	1.0242	0.6028	1.3051	1.3846	0.7339	0.7808	1.1618	1.0193	1.0058	1.0831	1.3329	1.3775	1.4078	0.669	0.9655	1.1805	0.6027	1.3702
N-acetylvaline	66789	96-81-1		HMDB0011757	1.5405	1.3248	0.8337	1.3002	1.5855	0.6301	0.9472	1.1143	0.7871	1.2737	1.7213	0.6592	0.7662	0.683	0.7222	0.9507	1.4079	1.4081	0.9625	0.8414	1.1119	1.5931	0.9581	1.3036	0.99	1.0489	2.4421	0.8634	0.5697	1.01	0.5605	2.1497
N-alpha-acetylornithine	439232	6205-08-09	C00437	HMDB0003357	0.9976	1.7034	0.5669	0.5121	1.0024	0.3844	0.5923	0.8882	0.6218	1.3563	1.2012	0.3683	0.5493	0.9262	0.7764	0.8105	1.7821	1.3805	1.648	1.8469	0.7851	1.0849	1.0113	1.8042	1.3312	2.0703	0.8794	0.7832	0.799	1.8427	1.0101	1.7802
N-arachidonoyltaurine	42607331	119959-65-8			2.5581	0.5487	0.7582	0.0982	1	0.228	3.2745	2.9734	0.8081	0.9033	0.2851	1.224	0.0982	0.2943	1.0988	1.5238	0.6659	0.9177	1.2751	0.9475	0.3962	1.1119	1.3486	3.7077	0.8621	1.3628	0.1443	2.6207	0.8456	2.7201	1.2592	1.1841
N-delta-acetylornithine	9920500		C00437	HMDB0003357	1.0595	0.3995	0.9857	1.2618	0.5841	1.0358	1.3516	0.9912	0.7746	1.2028	1.3911	1.4508	0.8582	0.7186	1.2301	0.402	1.0286	1.312	0.8933	0.6534	0.8572	1.141	0.7126	1.0088	0.8062	1.2633	0.8529	1.2512	0.7742	1.4056	0.6173	1.1807
N-formylmethionine	439750	4289-98-9	C03145	HMDB0001015	0.9151	1.6488	0.9342	0.913	0.7445	0.6728	0.947	0.8483	0.6749	0.821	0.8876	0.662	0.7585	0.9925	0.9967	1.3192	1.919	1.6373	1.7919	1.7362	0.9956	1.6429	1.6752	1.5446	1.1149	1.0033	1.6107	0.9073	1.3738	1.3041	1.0071	3.0609
N-glycolylneuraminate	123802	1113-83-3	C03410	HMDB0000833	0.8745	0.9445	0.8007	1.0057	1.5172	0.9126	1.1955	0.8471	0.9123	1.0804	1.1388	1.07	1.048	0.7937	0.9975	0.8936	1.0279	0.9738	1.0173	1.0378	1.0025	0.9791	1.0144	0.8961	1.1019	1.0439	0.9786	1.3722	1.1213	0.9596	0.6038	0.8435
N-linolenoyltaurine*					1.7249	0.8813	1.0339	0.7089	1.4759	1.0025	3.3329	3.9849	0.9975	0.5101	0.7583	2.7331	0.2814	0.6068	1.0603	0.5929	0.7574	1.0759	0.7684	0.8937	0.5955	1.5307	1.3944	1.6587	1.0952	0.9459	0.3975	2.6659	0.9828	1.7265	0.7156	1.5889
N-linoleoylglycine	6433346	2764-03-06			1.124	0.5707	0.6147	0.4053	0.8399	0.3265	2.0369	5.9785	0.9663	1.0624	0.4143	0.9808	0.1549	0.837	2.7425	0.963	0.7498	1.0332	1.0192	0.7474	1.0805	1.9824	1.2254	3.1721	0.9459	1.3093	0.6015	0.9293	2.1023	3.0075	1.0672	3.0948
N-linoleoyltaurine*	52922081				2.0395	0.6682	0.9139	0.2498	0.9507	0.4908	4.2464	5.9393	1.0374	0.5371	0.3681	2.1927	0.1143	0.4826	1.3631	1.1381	0.7203	0.9013	0.9368	1.01	0.5401	1.6801	1.4917	3.2649	0.99	0.9102	0.3165	2.071	1.4363	2.9825	1.1736	1.876
N-methyl-GABA	70703	1119-48-8	C15987		0.9689	1.4346	0.973	0.7335	0.9251	0.7536	0.8192	0.7166	1.0475	0.9901	0.7463	0.7362	0.5289	0.907	1.1237	0.9497	1.2506	1.2842	1.0311	1.0748	0.8113	1.0782	1.5766	1.2584	1.2473	1.0099	0.9748	1.4384	1.0264	1.1517	0.9587	1.4171
N-methylproline	643474	475-11-6		HMDB0094696	1.4696	0.9208	0.9272	1.3187	1.0554	1.3299	0.837	1.01	0.8453	0.9678	1.1018	1.0817	1.1431	1.3617	1.6421	0.7553	1.0632	1.4404	0.8851	0.8402	0.9363	0.5873	1.041	1.1948	0.99	0.8378	0.6572	0.8132	0.641	1.2126	0.8658	1.2915
N-monomethylarginine	132862	53308-83-1	C03884	HMDB0029416	1.7966	0.9708	1.1831	1.2193	1.4786	0.8337	1.2903	0.9892	1.0665	1.2155	1.1604	1.2753	0.8309	1.0108	1.3397	0.6157	0.9073	0.8283	1.1372	0.9801	0.8076	0.8164	0.5457	1.1229	1.0564	0.839	0.8453	1.4087	0.535	1.3438	0.5663	0.9391
N-octanoylglycine	84290	14246-53-8		HMDB0000832	0.7078	1.6363	0.6114	1.4558	0.5641	0.1224	1.2466	0.7138	0.5548	0.4634	0.8353	0.1053	0.326	1.0701	0.4808	0.4067	1.3955	1.5235	2.4632	1.2031	0.7789	2.9133	1.1581	0.9299	2.1113	0.8576	1.2815	0.4435	1.0931	1.4343	1.9826	1.4876
N-oleoylserine	44190514				1.1986	0.4889	0.8589	0.499	0.9378	0.6781	1.4372	7.246	2.0228	1.0651	0.4889	1.0066	0.4889	0.8245	0.9934	0.4889	0.4889	0.4889	0.4889	0.4889	0.7473	1.0558	0.4889	0.4889	0.4889	1.0841	0.4889	0.595	1.361	2.2428	0.9278	0.4889
N-oleoyltaurine	6437033	52514-04-2			2.4442	0.5775	1.336	0.1547	0.7055	0.4549	3.3416	5.508	1.2927	0.4879	0.2802	1.5741	0.0875	0.4169	1.1763	1.3235	0.5487	0.71	0.8348	0.7772	0.3853	1.2427	1.4719	3.1184	0.8766	0.6152	0.205	1.8064	1.1234	2.4853	1.4207	1.7918
N-palmitoleoyltaurine*					1.6014	1.2109	0.8828	0.3014	0.9337	0.6643	1.8166	3.778	0.8571	0.2241	0.4674	1.4689	0.1308	0.2222	0.4658	1.0351	0.6672	1.3147	1.0035	1.0669	0.2863	1.0571	2.3508	2.4851	0.9965	0.8806	0.2725	1.9144	0.9331	1.8497	1.2817	1.9045
N-palmitoyl-heptadecasphingosine (d17:1/16:0)*					1.4227	0.8748	1.1318	1.4699	1.2125	1.4304	1.3683	1.613	1.3676	1.1628	1.1392	1.5849	1.3603	1.0185	1.3786	0.4294	0.7207	0.6958	0.7005	0.6664	0.8147	0.8106	0.4689	0.8116	0.9081	0.9815	0.7708	1.6979	1.131	0.7781	0.7741	0.6055
N-palmitoyl-sphingadienine (d18:2/16:0)*					1.1971	0.9947	0.8222	1.3295	1.1496	1.0671	0.9483	1.5447	0.9506	1.1273	1.1614	1.337	1.2477	0.8884	1.455	0.8191	0.8634	1.0192	0.94	0.8659	1.0051	0.9949	0.7709	0.9084	0.9037	1.192	0.9604	3.166	1.4872	0.9934	1.0303	0.7564
N-palmitoyl-sphinganine (d18:0/16:0)	5283572	5966-29-0		HMDB11760	1.3744	0.8582	0.784	1.3805	1.7049	1.2244	1.8813	2.2293	1.3684	1.442	1.4102	1.2441	0.9718	1.2426	1.8139	0.8965	0.9262	0.6864	0.7255	0.7143	1.1008	0.9174	0.8967	1.0032	1.1244	0.9968	0.893	1.9884	0.9427	0.9422	0.9509	0.7625
N-palmitoyl-sphingosine (d18:1/16:0)	5283564	24696-26-2		HMDB0004949	1.3721	0.8302	1.0034	1.3333	1.1827	1.1468	1.3409	2.0713	1.332	1.0143	1.1666	1.3429	1.3002	1.0142	1.4728	0.7337	0.7905	0.7014	0.6228	0.6083	0.8656	0.9379	0.5934	0.8894	0.9966	0.769	0.7484	2.3354	0.9628	0.8334	1.0239	0.6166
N-palmitoylglycine	151008	2441-41-0		HMDB0013034	1.2262	0.7429	0.7649	0.2904	0.6553	0.4101	2.1636	4.7784	1.0527	1.2514	0.3606	0.8954	0.1398	0.8874	2.3259	1.3307	0.6583	0.9473	1.0888	0.9324	0.7811	1.5367	1.6766	3.0777	0.8768	1.4266	0.5276	0.857	2.1197	2.6972	1.4152	3.245
N-palmitoyltaurine	14504290	83982-06-3			2.5782	0.6134	0.9521	0.1214	0.491	0.3831	3.328	4.6181	1.1416	0.6545	0.2614	1.1888	0.0904	0.4225	1.3234	1.6018	0.4894	0.7227	0.8551	0.8002	0.3783	1.2838	2.2217	2.9663	0.7537	1.1572	0.2287	1.7329	1.0479	2.5384	1.3687	2.1831
N-stearoyl-sphingosine (d18:1/18:0)*	5283565	104404-17-3		HMDB0004950	2.1456	0.4597	1.5354	2.7	2.6232	2.4562	3.67	4.1108	2.4368	1.5815	2.0245	2.3955	1.8922	1.6826	1.9163	0.4968	0.4822	0.3774	0.386	0.3284	0.6146	0.6569	0.3464	0.9475	0.9132	0.5176	0.4839	3.1815	0.5842	0.9884	1.0116	0.4171
N-stearoyltaurine	168274	63155-80-6			1.6779	0.1996	0.9403	0.1996	0.5956	0.2842	2.8006	5.3007	0.864	0.6342	0.1996	0.6849	0.1996	0.4023	1.0734	2.097	0.4435	0.4603	0.416	0.5617	0.3757	1.2738	2.0424	2.9485	0.3924	1.0597	0.1996	1.3968	1.2144	1.5868	1.32	1.6467
N1-Methyl-4-pyridone-3-carboxamide	440810	769-49-3	C05843	HMDB0004194	1.1189	1.7212	1.4589	0.9792	1.1634	0.5329	0.8226	0.9507	1.0568	1.1445	0.8376	0.7555	0.865	0.594	1.1304	0.8831	1.2591	1.4304	0.8181	0.7314	1.0852	1.0208	0.8504	0.8869	1.2726	0.7506	1.0248	0.8984	2.0969	1.2451	0.8076	1.0863
1-methyladenosine	27476	15763-06-1	C02494	HMDB0003331	1.2048	1.0013	1.1335	1.1952	0.8225	0.9987	1.0123	1.3342	1.1433	0.8972	0.9937	0.9667	0.886	0.7896	0.7726	1.0941	0.9019	1.1503	0.8431	0.7529	0.9051	1.663	1.02	1.0726	1.0787	0.6064	2.0575	1.5259	0.7072	0.7152	0.7128	1.4685
N1-methylinosine	650095	20245-33-4		HMDB0002721	1.0919	0.8348	0.9246	0.9146	0.9633	0.8723	0.8987	1.1841	1.3339	0.8252	0.6694	0.9055	1.1426	1.1027	0.6714	1.0694	0.8052	1.1115	0.6694	0.6694	0.6694	2.085	1.0437	0.6694	1.0367	0.6694	1.4809	2.0688	0.779	0.6694	0.7735	1.3271
N2-acetyllysine	92907	1946-82-3	C12989	HMDB0000446	0.6053	1.4393	0.4982	0.3544	0.5264	0.4135	0.5178	0.7201	0.5925	0.7441	0.7209	0.3271	0.5613	0.8896	0.6081	1.381	1.4713	1.5132	1.4991	1.6865	1.0471	1.9247	1.8125	1.2553	1.5191	1.2891	1.3492	0.5951	1.2334	1.2331	0.9529	2.8321
N6,N6,N6-trimethyllysine	440120	23284-33-5	C03793	HMDB0001325	0.9836	0.749	1.2335	1.196	1.0951	0.8201	1.224	1.3593	1.3546	0.9732	1.0527	0.9396	0.9994	0.7327	0.8279	1.2447	0.8001	0.9281	1.2234	1.0006	1.0235	1.4636	1.2166	0.795	0.8896	0.9809	1.5754	1.4564	0.7715	0.7421	0.6452	1.2333
N6,N6-dimethyllysine	193344	2259-86-1	C05545	HMDB0013287	1.5119	0.9939	1.0495	1.447	1.5189	0.8148	0.9962	1.1116	1.0352	1.2671	1.2104	1.2793	0.8346	0.7844	1.2206	0.7585	0.974	0.9513	0.9881	0.8127	1.0038	1.0511	0.614	0.9715	0.85	0.739	1.0445	1.0621	0.7431	1.1811	0.549	1.0279
N6-acetyllysine	92832	692-04-6	C02727	HMDB0000206	1.7117	0.9124	1.3549	1.2254	1.7673	0.731	1.516	1.3701	1.3602	1.3545	1.4639	0.976	1.0978	0.9393	0.9257	0.6064	0.971	1.0324	1.1003	0.9687	0.7627	1.0027	0.8281	1.0821	0.9588	1.0388	0.9973	0.9502	0.6201	1.2696	0.682	0.9576
N6-carbamoylthreonyladenosine	161466	24719-82-2		HMDB0041623	0.7934	0.8001	1.3574	2.0751	1.3198	1.1997	0.9398	1.4156	1.5021	0.995	1.0354	1.3062	1.0196	0.7409	0.6804	0.742	0.803	0.8686	0.7914	0.6274	1.0974	2.2749	1.1542	0.6499	0.8916	0.67	2.385	1.0418	1.005	0.5071	0.5441	1.1552
N6-carboxymethyllysine	123800	5746-04-03		HMDB0240347	0.4756	0.5538	0.581	1.0657	0.3867	1.2077	0.1802	0.8335	0.5961	0.7196	0.9513	0.1802	1.0624	0.9679	1.059	1.0924	0.8268	1.1179	1.1777	1.1457	1.9178	1.0461	0.6565	1.0683	1.0321	0.1802	0.1802	0.1802	0.1802	1.0743	0.3624	0.1802
N6-methyllysine	164795	1188-07-4	C02728	HMDB0002038	1.4646	0.8329	1.4251	1.2311	1.351	0.9926	1.758	1.2063	1.5546	1.4972	1.3675	1.0987	0.9082	0.7916	1.2598	0.6151	1.0591	0.9433	0.9761	1.0211	0.5822	1.0074	0.6995	1.0757	0.6658	0.838	0.5398	0.8505	0.5986	1.1698	0.625	0.8048
N6-succinyladenosine	165243	4542-23-8		HMDB0000912	0.943	0.8318	0.4847	0.977	1.2776	1.9412	0.6199	0.9727	1.2002	1.1566	1.6299	1.1466	1.1258	1.023	1.3696	0.3455	0.8155	1.2092	0.7692	0.6786	1.4763	0.647	0.7779	0.5735	1.1132	1.1281	2.3768	1.2852	1.2022	0.9293	0.5004	0.55
nervonoylcarnitine (C24:1)*					0.1751	2.8776	0.1751	0.1751	0.1751	0.1751	0.1751	0.2269	0.1899	0.21	0.1751	0.1751	0.1751	0.1751	0.1751	0.4849	1.8103	2.8502	0.9331	1.7777	1.5003	0.8307	1.9303	1.0669	0.9183	3.1091	1.1362	0.2013	2.6821	0.7259	0.667	1.7683
nicotinamide	936	98-92-0	C00153	HMDB0001406	0.9814	1.0576	0.9383	0.9909	1.0066	1.0232	0.9934	1.0355	0.9906	0.9833	1.0786	0.9765	0.9809	0.9834	1.0152	0.8148	1.0419	1.1122	1.0244	0.9622	1.051	1.082	0.956	1.0236	1.1558	0.9706	1.1	0.8521	0.8775	1.0439	0.8544	1.1259
NAD+	5892	53-84-9	C00006	HMDB0000217	1.0439	0.7927	0.8879	1.0216	1.6714	0.8556	1.5826	1.1419	1.1561	1.5318	1.4668	1.1469	0.9202	0.9001	0.997	0.6545	1.3025	1.0624	0.7997	0.9162	0.7538	1.003	1.3014	0.965	1.0582	0.8005	0.9647	1.0104	0.7765	1.0465	0.7387	0.9721
nicotinamide N-oxide	72661	1986-81-8		HMDB0002730	0.8904	1.8822	0.5846	0.9757	1.0646	0.5421	0.6651	0.8624	0.4638	0.4984	0.5182	1.1055	0.5395	0.7648	1.1277	0.8424	1.8633	2.048	2.0187	1.4485	2.1045	1.1864	0.6614	2.0679	1.4882	0.9136	1.2538	0.5733	1.383	2.6708	0.895	1.0243
nicotinamide ribonucleotide (NMN)	14180	1094-61-7	C00455	HMDB0000229	0.4297	0.4445	0.8845	0.8793	2.7756	0.642	1.7747	1.2386	1.8245	2.4994	1.5328	1.4373	1.2205	1.0732	0.8577	0.7416	1.277	0.4649	0.7998	0.9405	0.4798	1.1006	0.7036	1.001	1.301	0.337	1.1873	1.2567	0.7866	0.9903	0.999	1.6741
nicotinamide riboside	439924	1341-23-7	C03150	HMDB0000855	0.7396	0.4693	1.0593	1.4019	2.5799	0.6498	1.6978	1.4642	0.8367	2.0432	1.5842	1.6124	1.0116	0.8678	1.0934	0.5719	1.3586	0.5682	0.8183	0.7149	0.6566	1.3308	0.3615	0.9884	1.1319	0.3203	1.0782	1.1814	0.566	0.7443	0.5536	1.7401
nicotinate	938	59-67-6	C00253	HMDB0001488	1.7308	0.939	0.9847	1.2532	1.7804	0.7425	1.4854	0.9637	1.1635	1.0115	1.4614	1.8587	1.5478	1.3501	1.7827	0.8514	1.1306	0.5878	1.1318	0.9074	0.8524	0.9885	0.5894	0.9075	1.1166	0.7213	1.284	0.8696	0.5974	1.3981	0.9132	0.9611
nisinate (24:6n3)	11792612	68378-49-4		HMDB0013025	0.9781	0.5441	0.6597	0.0909	0.6945	0.4653	2.1228	4.3618	1.0131	1.0729	0.3276	0.8979	0.0453	0.8613	2.4399	1.9648	0.4663	0.7901	1.0574	1.098	0.8422	0.9784	2.5397	3.269	0.9869	1.7133	0.69	1.3789	2.8095	2.7215	1.8632	3.3224
nonadecanoate (19:0)	12591	646-30-0	C16535	HMDB0000772	0.8933	0.5901	0.5777	0.1686	0.4032	0.3452	1.5094	2.6541	0.7717	0.9754	0.3242	0.7754	0.1732	0.7899	1.9039	2.2203	0.7073	0.723	1.0718	1.1433	1.0246	1.1823	2.4602	2.6095	0.8184	1.5035	0.7599	1.0385	2.5852	2.1699	1.8593	2.9741
nonanoylcarnitine (C9)	91825642			HMDB0013288	1.502	0.7456	1.1242	0.806	1.3155	0.9637	1.6773	0.9883	1.0534	1.4849	0.9661	0.6884	0.7803	1.4055	0.5618	1.7253	1.0554	0.7636	0.3377	1.8809	0.6271	0.2872	1.1546	1.4835	0.8938	0.7311	0.8826	0.9817	2.3828	1.2923	1.6982	1.0117
noradrenaline	439260	51-41-2	D00076,C00547	HMDB0000216	2.1116	0.765	1	1.5397	1.5565	1.6727	0.7277	1.3718	0.9413	1.8597	1.7888	1.1683	0.8247	1.337	2.0973	0.1972	0.9886	0.6163	0.4124	1.6482	0.1972	0.9091	0.5922	1.1233	1.7948	0.6251	1.0021	1.9614	0.7543	0.7284	0.504	0.9765
O-methyltyrosine	441350;2723935	1080-06-4	D00762	HMDB0014903	1.3524	1.1945	1.0392	0.9816	0.9967	0.8673	1.0084	1.0537	0.9989	1.1737	1.1196	0.7609	0.7803	0.9353	0.9242	0.6951	1.0695	0.9489	1.2487	0.9315	1.0011	0.9278	0.7267	1.1968	1.1005	0.6875	1.0489	1.0279	0.6188	1.252	0.5613	1.1487
O-sulfo-L-tyrosine	514186				1.3066	0.7982	1.1262	1.0418	1.2943	1.1227	1.1085	0.9146	1.1331	1.3591	1.1295	1.1496	1.3176	0.7477	1.0209	0.6988	1.0308	0.7688	0.926	0.8203	0.8033	1.042	0.8937	0.8907	0.8484	0.8934	1.1415	1.1842	0.9791	0.7711	0.5702	0.9352
[truncated: 197 more rows]

## Sheet:  Table S1c-brain
Supplementary Table S1c. Total Metabolites Identified in Brain of Slc13a5 Deficiency Mice
[truncated: 657 more rows]

## Sheet: Table S2
Supplementary Table S2. Molecules Perturbed in Slc13a5 Deficiency Mouse Tissues as Determined by CTD Analysis
[truncated: 72 more rows]

[truncated: 3 more sheets: Table S3, Table S4, Table S5]
